# Supplementary material for: Genome architecture evolution in an invasive copepod species complex
Source: Research Square preprint supplement (doi:10.21203/rs.3.rs-4536365/v1), 2024-06-28
Supplement: Supplementary file 1 [file 9b12a43dfa6cf6fb28a9a200.xlsx]

## Sheet: Title
Supplementary Tables
Genome architecture evolution in an invasive copepod species complex
Zhenyong Du1,*, Johannes Wirtz2, Yifei Joye Zhou1, Anna Jenstead1, Taylor Opgenorth1, Angelise Puls1, Cullan Meyer1, Gregory W. Gelembiuk1, Carol Eunmi Lee1,*
Table of contents:
Table S1. Genome assembly statistics of three reference genomes of the Eurytemora affinis complex.
Table S2. Repetitive sequences in the genome of the Gulf clade of the Eurytemora affinis complex (E. gufia sp. nov.).
Table S3. Repetitive sequences in the genome of Europe clade of the Eurytemora affinis complex (E. affinis proper).
Table S4. Functional annotation of protein-coding genes in the genomes of Gulf and Europe clades of the Eurytemora affinis complex.
Table S5. Copepod and daphnid genome assemblies used in the comparative genomic analyses.
Table S6. GO enrichment of expanded genes in the Eurytemora affinis complex.
Table S7. GO enrichment of contracted genes in the Eurytemora affinis complex.
Table S8. GO enrichment of unique genes in the Eurytemora affinis complex.
Table S9. GO enrichment of lost genes in the Eurytemora affinis complex.
Table S10. Key ion transporter gene positions relative to the edges of each chromosome in the three clades of the Eurytemora affinis complex.
Table S11. GO enrichment of genes under selection associated with salinity adaptation in the Atlantic clade of the Eurytemora affinis complex.
Table S12. GO enrichment of genes under selection associated with salinity adaptation in the Gulf clade of the Eurytemora affinis complex.
Table S13. Statistical analyses on selection signatures associated with salinity adaptation in the Atlantic clade of the Eurytemora affinis complex.
Table S14. Statistical analyses on selection signatures associated with salinity adaptation in the Gulf clade of the Eurytemora affinis complex.
Table S15. GC contents of telomere regions and fusion sites of each chromosome in the Atlantic and Gulf clades of the Eurytemora affinis complex.
Table S16. Morphological data of female copepod samples used for the PCA analysis of the Eurytemora affinis complex.
Table S17. Morphological data of male copepod samples used for the PCA analysis of the Eurytemora affinis complex.
Table S18. Sample information used in the population genomic analyses of the Eurytemora affinis complex.
1Department of Integrative Biology, 430 Lincoln Drive, Birge Hall, University of Wisconsin, Madison, WI 53706, U.S.A.
2CEFE, Université de Montpellier, CNRS, EPHE, IRD, Montpellier 34090, France
*Corresponding Authors:
Zhenyong Du, zdu53@wisc.edu; Carol E. Lee, carollee@wisc.edu

## Sheet: Table S1
Table S1. Genome assembly statistics of three reference genomes of the Eurytemora affinis complex.
Features	E. carolleeae	E. gulfia	E. affinis
Assembly level	Chromosome	Chromosome	Chromosome
Genome size (Mb)	529.3 Mb	521.1 Mb	670.9 Mb
Number of chromosomes	4	7	15
Number of scaffolds	1203	196	721
Scaffold N50 (Mb)	140.6 Mb	69.6 Mb	42.5 Mb
Number of contigs	325	338	1342
Contig N50 (Mb)	4.2 Mb	3.6 Mb	1.0 Mb
GC content (%)	0.33	0.327	0.33
Repeat content (%)	0.4612	0.4552	0.502
Number of protein-coding genes	20262	22391	24176
Complete BUSCO	0.931	0.92	0.916

## Sheet: Table S2
Table S2. Repetitive sequences in the genome of the Gulf clade of the Eurytemora affinis complex (E. gufia sp. nov.).
Type of elements		Number of elements	Length occupied (bp)	Percentage of sequence (%)
Retroelements	Retroelements	286048	78478367	15.06
	SINEs:	3629	522254	0.1
	Penelope	3800	1442521	0.28
	LINEs:	25456	11228771	2.15
	CRE/SLACS	623	138087	0.03
	L2/CR1/Rex	10582	3791786	0.73
	R1/LOA/Jockey	1518	669489	0.13
	R2/R4/NeSL	1130	1136365	0.22
	RTE/Bov-B	2255	612861	0.12
	L1/CIN4	1275	864077	0.17
	LTR elements:	256963	66727342	12.81
	BEL/Pao	6541	3999961	0.77
	Ty1/Copia	71025	10072725	1.93
	Gypsy/DIRS1	115141	41845586	8.03
	Retroviral	7553	1637322	0.31
DNA transposons	DNA transposons	516204	81428556	15.63
	hobo-Activator	213917	34451356	6.61
	Tc1-IS630-Pogo	177608	25508686	4.9
	En-Spm	0	0	0
	MULE-MuDR	0	0	0
	PiggyBac	4407	872571	0.17
	Tourist/Harbinger	40927	5319460	1.02
	Other	1681	465816	0.09
Rolling-circles		34739	5663726	1.09
Unclassified:		359058	47757012	9.17
Total interspersed repeats:			207663935	39.85
Small RNA:		2767	234117	0.04
Satellites:		7163	1671240	0.32
Simple repeats:		157681	20375405	3.91
Low complexity:		24229	1526562	0.29
Total repeats:			237134238	45.51

## Sheet: Table S3
Table S3. Repetitive sequences in the genome of Europe clade of the Eurytemora affinis complex (E. affinis proper).
Type of elements		Number of elements	Length occupied (bp)	Percentage of sequence (%)
Retroelements	Retroelements	240074	123252781	18.37
	SINEs:	2687	419595	0.06
	Penelope	4937	1955214	0.29
	LINEs:	31398	15112753	2.25
	CRE/SLACS	4	136	0
	L2/CR1/Rex	12050	5291007	0.79
	R1/LOA/Jockey	1661	365253	0.05
	R2/R4/NeSL	1288	1048043	0.16
	RTE/Bov-B	4101	1316469	0.2
	L1/CIN4	1375	405705	0.06
	LTR elements:	205989	107720433	16.06
	BEL/Pao	12347	12401971	1.85
	Ty1/Copia	35193	8468844	1.26
	Gypsy/DIRS1	112961	73443859	10.95
	Retroviral	11081	2359856	0.35
DNA transposons	DNA transposons	687821	116909120	17.43
	hobo-Activator	289663	49714363	7.41
	Tc1-IS630-Pogo	244967	37135958	5.54
	En-Spm	0	0	0
	MULE-MuDR	0	0	0
	PiggyBac	4678	1662828	0.25
	Tourist/Harbinger	27842	3190439	0.48
	Other	2004	295796	0.04
Rolling-circles		82198	13094238	1.95
Unclassified:		352720	49637960	7.4
Total interspersed repeats:			289799861	43.2
Small RNA:		19135	2723679	0.41
Satellites:		8423	2621797	0.39
Simple repeats:		186653	26524931	3.95
Low complexity:		28100	1940295	0.29
Total repeats:			336704320	50.19

## Sheet: Table S4
Table S4. Functional annotation of protein-coding genes in the genomes of Gulf and Europe clades of the Eurytemora affinis complex.
Species	E. gulfia sp. nov (Gulf clade)		E. affinis proper (Europe clade)
Database	Gene number	Percentage (%)	Gene number	Percentage (%)
Combined annotation	22385	99.97	24117	99.76
Refseq_invertebrate	22093	98.67	23730	98.16
UniProtKB/Swiss-Prot	21804	97.38	23150	95.76
RefSeq_Ecar (GCF_000591075.1-RS_2023_10)	22338	99.76	24022	99.36
GO	6451	28.81	3769	15.59
KEGG	5263	23.5	3147	13.02
COG	7579	33.85	4385	18.14
eggNOG	7691	34.35	4427	18.31
pfam	10021	44.75	5680	23.49

## Sheet: Table S5
Table S5. Copepod and daphnid genome assemblies used in the comparative genomic analyses.
No.	Order	Species name	Assembly level	Genome size	Contig	N50	Scaffold	N50	Chromosome	Protein-coding genes	GC content	Link
1	Branchiopoda	Daphinia pulex	Chromosome	133.2 Mb	16	8.3 Mb	12	12.3 Mb	12	15295	0.405	https://www.ncbi.nlm.nih.gov/genome/?term=Daphinia+pulex
2		Daphnia magna	Chromosome	161.5 Mb	432	1.5 Mb	308	12.5 Mb	10	16891	0.395	https://www.ncbi.nlm.nih.gov/genome/?term=Daphnia+magna
3		Daphnia pulicaria*	Chromosome	185.1 Mb	299	3.5 Mb	155	18.9 Mb	12	16865	0.41	https://www.ncbi.nlm.nih.gov/genome/?term=Daphnia+pulicaria
4		Daphnia sinensis*	Chromosome	119.6 Mb	450	3.1 Mb	377	8.9 Mb	10	16955	0.405	https://www.ncbi.nlm.nih.gov/genome/?term=Daphnia+sinensis
5	Copepoda	Lepeophtheirus salmonis	Chromosome	647.2 Mb	8670	4.5 Mb	8065	48.5 Mb	15	13081	0.305	https://www.ncbi.nlm.nih.gov/genome/?term=Lepeophtheirus+salmonis
6		Tigriopus californicus	Chromosome	191.1 Mb	11341	44.4 Kb	459	15.8 Mb	12	15500	0.42	https://www.ncbi.nlm.nih.gov/genome/?term=Tigriopus+californicus
*These two genomes are only used in the divergence time estimation.

## Sheet: Table S6
Table S6. GO enrichment of expanded genes in the Eurytemora affinis complex.
Class	GO name	GO ID	GO level	P-value	Enrichment score	Hits genes counts in selected set	Hits genes counts in background	All genes counts in selected set	All genes counts in background	Genes of selected set in GO term
Molecular function	structural constituent of muscle	GO:0008307	3	0	2.93277	63	97	2671	12061	Egulf18131-RA,Eaff17998-RA,Eaffi19653-RA,Eaffi12832-RA,Eaff13293-RA,Egulf07727-RA,Eaffi12946-RA,Eaffi15418-RA,Eaffi23452-RA,Eaff02890-RA,Eaffi05569-RA,Eaff09656-RA,Eaffi23121-RA,Egulf00432-RA,Eaffi02849-RA,Eaffi21583-RA,Eaffi15214-RA,Eaffi02248-RA,Eaffi24006-RA,Eaffi12661-RA,Eaff04392-RA,Egulf20022-RA,Egulf20214-RA,Eaff06505-RA,Egulf18288-RA,Eaffi04589-RA,Eaffi13100-RA,Eaffi13522-RA,Egulf07430-RA…
Molecular function	P-type sodium transporter activity	GO:0008554	9	0	4.25751	33	35	2671	12061	Eaff17998-RA,Egulf21938-RA,Egulf18406-RA,Eaffi21837-RA,Eaffi05864-RA,Eaff19987-RA,Egulf07745-RA,Eaffi07240-RA,Eaffi18038-RA,Egulf18400-RA,Eaff09762-RA,Egulf04479-RA,Eaff09487-RA,Eaff12348-RA,Eaff05782-RA,Eaff18149-RA,Eaff16080-RA,Eaff01559-RA,Egulf18367-RA,Eaff09732-RA,Egulf15768-RA,Egulf01323-RA,Egulf09502-RA,Egulf13577-RA,Eaff09765-RA,Egulf14045-RA,Eaffi10227-RA,Egulf18404-RA,Egulf19507-RA,Eaff…
Molecular function	monoatomic ion channel activity	GO:0005216	6	0	2.16865	219	456	2671	12061	Eaff06489-RA,Eaff07460-RA,Egulf13360-RA,Eaffi06167-RA,Eaff10158-RA,Egulf09425-RA,Egulf02334-RA,Egulf18921-RA,Eaff16308-RA,Eaff11639-RA,Egulf07470-RA,Eaffi20233-RA,Eaff13502-RA,Egulf10934-RA,Eaff16598-RA,Eaff16787-RA,Eaff15089-RA,Eaffi16810-RA,Eaff02324-RA,Egulf05955-RA,Eaff00486-RA,Eaff11087-RA,Egulf00537-RA,Eaff10561-RA,Eaff01648-RA,Eaffi01328-RA,Eaff03120-RA,Egulf13623-RA,Eaff20005-RA,Egulf1660…
Molecular function	extracellular ligand-gated monoatomic ion channel activity	GO:0005230	9	0	2.95409	70	107	2671	12061	Egulf13360-RA,Eaff10158-RA,Egulf07470-RA,Eaff13502-RA,Egulf10934-RA,Eaff16598-RA,Eaff16787-RA,Eaff00486-RA,Eaff01648-RA,Eaffi01328-RA,Eaff03120-RA,Egulf01295-RA,Eaff04968-RA,Egulf02145-RA,Egulf01899-RA,Eaffi13417-RA,Egulf09416-RA,Egulf10849-RA,Eaff03814-RA,Egulf18192-RA,Egulf19242-RA,Eaff04548-RA,Egulf02856-RA,Egulf04530-RA,Eaff14433-RA,Eaff10566-RA,Eaffi15959-RA,Eaffi06391-RA,Egulf18239-RA,Egulf…
Molecular function	gap junction channel activity	GO:0005243	7	0	4.51554	25	25	2671	12061	Egulf04654-RA,Eaffi03766-RA,Eaff12204-RA,Egulf17966-RA,Egulf05598-RA,Eaff12203-RA,Egulf05945-RA,Egulf11353-RA,Eaff17232-RA,Eaff03321-RA,Eaffi05274-RA,Eaff14985-RA,Eaff12200-RA,Eaff16467-RA,Eaff11103-RA,Eaffi13415-RA,Egulf05949-RA,Egulf05597-RA,Eaff14984-RA,Eaffi05782-RA,Egulf21680-RA,Eaff11110-RA,Eaff04966-RA,Egulf18332-RA,Egulf04662-RA,
Molecular function	voltage-gated monoatomic ion channel activity	GO:0005244	8	0	2.48355	99	180	2671	12061	Eaff06489-RA,Egulf13360-RA,Eaffi06167-RA,Egulf09425-RA,Eaff16308-RA,Eaff11639-RA,Eaffi20233-RA,Eaff16598-RA,Eaffi16810-RA,Eaff02324-RA,Eaff11087-RA,Egulf00537-RA,Eaff03120-RA,Egulf13623-RA,Eaff20005-RA,Egulf17829-RA,Eaff13349-RA,Eaff14897-RA,Eaff05741-RA,Eaff12671-RA,Egulf09416-RA,Eaff19403-RA,Egulf18099-RA,Egulf19307-RA,Eaffi18104-RA,Eaff15766-RA,Egulf14970-RA,Egulf05093-RA,Eaffi18296-RA,Egulf04…
Molecular function	signaling receptor activity	GO:0038023	3	0	1.7361	208	541	2671	12061	Egulf20802-RA,Eaffi04572-RA,Eaff07460-RA,Eaff11702-RA,Egulf13360-RA,Eaff10158-RA,Eaff10707-RA,Egulf04654-RA,Eaff16534-RA,Eaff18894-RA,Egulf16154-RA,Egulf18372-RA,Eaff07423-RA,Egulf17362-RA,Eaffi20515-RA,Eaff10384-RA,Eaff11639-RA,Eaff03216-RA,Egulf07470-RA,Eaff12097-RA,Eaff13502-RA,Egulf10934-RA,Eaff16598-RA,Eaff16787-RA,Eaffi04076-RA,Egulf19357-RA,Egulf10298-RA,Eaff00486-RA,Eaffi03766-RA,Eaffi045…
Molecular function	potassium channel activity	GO:0005267	8	0	2.61229	70	121	2671	12061	Eaff06489-RA,Egulf09425-RA,Eaff16308-RA,Eaff15089-RA,Eaffi16810-RA,Eaff02324-RA,Eaff00486-RA,Eaff03120-RA,Egulf13623-RA,Egulf01295-RA,Eaff13349-RA,Egulf09416-RA,Eaff19403-RA,Egulf18099-RA,Egulf19307-RA,Eaffi18104-RA,Egulf14970-RA,Egulf04530-RA,Egulf13735-RA,Egulf01842-RA,Egulf17008-RA,Egulf08386-RA,Egulf04910-RA,Eaff18470-RA,Egulf03276-RA,Egulf18604-RA,Egulf19251-RA,Eaff03131-RA,Egulf19665-RA,Eaf…
Molecular function	salt transmembrane transporter activity	GO:1901702	4	0	1.98655	282	641	2671	12061	Eaff06489-RA,Eaff07460-RA,Eaff17478-RA,Egulf13360-RA,Eaffi06167-RA,Eaff10158-RA,Egulf09425-RA,Eaff17998-RA,Eaff04677-RA,Egulf02334-RA,Eaff16308-RA,Eaff11639-RA,Egulf21938-RA,Egulf07470-RA,Eaffi20233-RA,Eaff13502-RA,Egulf10934-RA,Egulf06466-RA,Eaff16598-RA,Eaff16787-RA,Eaff15089-RA,Eaffi16810-RA,Eaff02324-RA,Eaff00486-RA,Eaff11087-RA,Egulf00537-RA,Eaff10561-RA,Eaffi13587-RA,Eaff01648-RA,Eaffi01328…
Molecular function	metal ion transmembrane transporter activity	GO:0046873	6	0	2.00503	238	536	2671	12061	Eaff06489-RA,Eaff17478-RA,Egulf13360-RA,Eaffi06167-RA,Egulf09425-RA,Eaff17998-RA,Eaff04677-RA,Egulf02334-RA,Eaff16308-RA,Eaff11639-RA,Egulf21938-RA,Eaffi20233-RA,Egulf06466-RA,Eaff16598-RA,Eaff15089-RA,Eaffi16810-RA,Eaff02324-RA,Eaff00486-RA,Eaff11087-RA,Egulf00537-RA,Eaff10561-RA,Eaffi13587-RA,Eaff03120-RA,Egulf13623-RA,Egulf02095-RA,Egulf18406-RA,Eaff20005-RA,Egulf16606-RA,Eaffi21837-RA,Eaff166…
Molecular function	identical protein binding	GO:0042802	4	0	1.31103	628	2163	2671	12061	Egulf04437-RA,Eaffi21345-RA,Eaffi21906-RA,Eaff06489-RA,Egulf01045-RA,Eaff12123-RA,Eaff18587-RA,Eaff01580-RA,Eaff01338-RA,Egulf01708-RA,Egulf06159-RA,Eaffi16694-RA,Eaff11931-RA,Eaff04731-RA,Eaff01936-RA,Egulf18131-RA,Eaff00291-RA,Eaff10158-RA,Eaffi18953-RA,Eaff07804-RA,Eaff17172-RA,Eaff08581-RA,Eaff14623-RA,Eaffi09470-RA,Eaff01363-RA,Egulf20904-RA,Eaff14226-RA,Egulf01655-RA,Eaff00635-RA,Eaff17998-…
Molecular function	actin filament binding	GO:0051015	6	0	2.48445	137	249	2671	12061	Eaffi21345-RA,Egulf18131-RA,Eaffi18953-RA,Eaff17998-RA,Eaffi19653-RA,Eaffi12832-RA,Eaff13293-RA,Egulf21488-RA,Egulf07727-RA,Eaffi12946-RA,Eaff02890-RA,Eaffi05569-RA,Eaff09656-RA,Eaff10212-RA,Eaffi23121-RA,Egulf05014-RA,Egulf11514-RA,Egulf00537-RA,Egulf00432-RA,Eaffi02849-RA,Eaffi08671-RA,Eaffi03609-RA,Eaffi21583-RA,Egulf07505-RA,Eaffi15214-RA,Eaff15663-RA,Eaffi02248-RA,Eaffi12714-RA,Egulf14314-RA…
Molecular function	transmitter-gated monoatomic ion channel activity	GO:0022824	10	0	3.02497	69	103	2671	12061	Egulf13360-RA,Eaff10158-RA,Egulf07470-RA,Eaff13502-RA,Egulf10934-RA,Eaff16598-RA,Eaff16787-RA,Eaff00486-RA,Eaff01648-RA,Eaffi01328-RA,Eaff03120-RA,Egulf01295-RA,Eaff04968-RA,Egulf02145-RA,Egulf01899-RA,Eaffi13417-RA,Egulf09416-RA,Egulf10849-RA,Egulf18192-RA,Egulf19242-RA,Eaff04548-RA,Egulf02856-RA,Egulf04530-RA,Eaff14433-RA,Eaff10566-RA,Eaffi15959-RA,Eaffi06391-RA,Egulf18239-RA,Egulf17008-RA,Egul…
Molecular function	voltage-gated channel activity	GO:0022832	7	0	2.48355	99	180	2671	12061	Eaff06489-RA,Egulf13360-RA,Eaffi06167-RA,Egulf09425-RA,Eaff16308-RA,Eaff11639-RA,Eaffi20233-RA,Eaff16598-RA,Eaffi16810-RA,Eaff02324-RA,Eaff11087-RA,Egulf00537-RA,Eaff03120-RA,Egulf13623-RA,Eaff20005-RA,Egulf17829-RA,Eaff13349-RA,Eaff14897-RA,Eaff05741-RA,Eaff12671-RA,Egulf09416-RA,Eaff19403-RA,Egulf18099-RA,Egulf19307-RA,Eaffi18104-RA,Eaff15766-RA,Egulf14970-RA,Egulf05093-RA,Eaffi18296-RA,Egulf04…
Molecular function	ligand-gated channel activity	GO:0022834	7	0	2.38398	85	161	2671	12061	Egulf13360-RA,Eaff10158-RA,Egulf07470-RA,Eaff13502-RA,Egulf10934-RA,Eaff16598-RA,Eaff16787-RA,Eaffi16810-RA,Eaff00486-RA,Eaff01648-RA,Eaffi01328-RA,Eaff03120-RA,Eaff20005-RA,Egulf01295-RA,Eaff04968-RA,Egulf02145-RA,Egulf01899-RA,Eaffi13417-RA,Egulf09416-RA,Egulf10849-RA,Eaff03814-RA,Egulf18192-RA,Egulf18099-RA,Egulf19242-RA,Eaff04548-RA,Egulf02856-RA,Egulf04530-RA,Eaff14433-RA,Egulf05093-RA,Eaff1…
Molecular function	transmitter-gated channel activity	GO:0022835	8	0	2.91189	69	107	2671	12061	Egulf13360-RA,Eaff10158-RA,Egulf07470-RA,Eaff13502-RA,Egulf10934-RA,Eaff16598-RA,Eaff16787-RA,Eaff00486-RA,Eaff01648-RA,Eaffi01328-RA,Eaff03120-RA,Egulf01295-RA,Eaff04968-RA,Egulf02145-RA,Egulf01899-RA,Eaffi13417-RA,Egulf09416-RA,Egulf10849-RA,Egulf18192-RA,Egulf19242-RA,Eaff04548-RA,Egulf02856-RA,Egulf04530-RA,Eaff14433-RA,Eaff10566-RA,Eaffi15959-RA,Eaffi06391-RA,Egulf18239-RA,Egulf17008-RA,Egul…
Molecular function	transmembrane transporter activity	GO:0022857	3	0	1.67134	456	1232	2671	12061	Eaff06489-RA,Eaff15515-RA,Eaffi04572-RA,Eaff07460-RA,Eaff17478-RA,Egulf13360-RA,Eaffi06167-RA,Eaff10158-RA,Egulf09425-RA,Eaffi15139-RA,Egulf04654-RA,Eaff17998-RA,Eaff13715-RA,Eaff04677-RA,Eaff09690-RA,Eaffi00389-RA,Egulf02334-RA,Egulf18921-RA,Eaff16419-RA,Eaff03123-RA,Eaff16308-RA,Eaff11639-RA,Egulf21938-RA,Eaff04805-RA,Egulf07470-RA,Eaffi20233-RA,Eaff12097-RA,Eaff13502-RA,Eaffi16011-RA,Egulf1093…
Molecular function	inorganic cation transmembrane transporter activity	GO:0022890	5	0	1.79449	306	770	2671	12061	Eaff06489-RA,Eaffi04572-RA,Eaff17478-RA,Egulf13360-RA,Eaffi06167-RA,Egulf09425-RA,Eaff17998-RA,Eaff13715-RA,Eaff04677-RA,Egulf02334-RA,Egulf18921-RA,Eaff03123-RA,Eaff16308-RA,Eaff11639-RA,Egulf21938-RA,Egulf07470-RA,Eaffi20233-RA,Eaff12097-RA,Egulf06466-RA,Eaff02648-RA,Eaff16598-RA,Eaff15089-RA,Eaffi16810-RA,Egulf00886-RA,Eaff02324-RA,Egulf05955-RA,Eaff00486-RA,Eaff11087-RA,Egulf00537-RA,Eaff1056…
Molecular function	ADP binding	GO:0043531	9	0	3.07878	75	110	2671	12061	Eaffi18953-RA,Eaff17998-RA,Eaffi16723-RA,Egulf21488-RA,Eaffi16338-RA,Eaff07714-RA,Egulf21938-RA,Egulf11514-RA,Egulf19787-RA,Eaffi08671-RA,Egulf18406-RA,Eaffi21837-RA,Egulf03699-RA,Egulf00032-RA,Egulf13025-RA,Eaff15663-RA,Eaff17002-RA,Eaffi05864-RA,Eaff19987-RA,Egulf14314-RA,Egulf07745-RA,Eaffi14977-RA,Eaff00672-RA,Eaffi07240-RA,Egulf21483-RA,Eaffi08670-RA,Eaffi18038-RA,Egulf18400-RA,Egulf19785-RA…
Molecular function	ligand-gated monoatomic ion channel activity	GO:0015276	8	0	2.38398	85	161	2671	12061	Egulf13360-RA,Eaff10158-RA,Egulf07470-RA,Eaff13502-RA,Egulf10934-RA,Eaff16598-RA,Eaff16787-RA,Eaffi16810-RA,Eaff00486-RA,Eaff01648-RA,Eaffi01328-RA,Eaff03120-RA,Eaff20005-RA,Egulf01295-RA,Eaff04968-RA,Egulf02145-RA,Egulf01899-RA,Eaffi13417-RA,Egulf09416-RA,Egulf10849-RA,Eaff03814-RA,Egulf18192-RA,Egulf18099-RA,Egulf19242-RA,Eaff04548-RA,Egulf02856-RA,Egulf04530-RA,Eaff14433-RA,Egulf05093-RA,Eaff1…
Molecular function	cytoskeletal protein binding	GO:0008092	4	0	1.49689	361	1089	2671	12061	Eaffi21345-RA,Eaff01580-RA,Eaff01338-RA,Egulf06159-RA,Eaff11931-RA,Egulf18131-RA,Eaff00291-RA,Eaffi18953-RA,Eaff08581-RA,Eaff09398-RA,Egulf11154-RA,Eaff17998-RA,Egulf14305-RA,Eaffi19653-RA,Eaffi12832-RA,Eaff13293-RA,Egulf18372-RA,Egulf21488-RA,Egulf07727-RA,Egulf10541-RA,Eaffi12946-RA,Eaff17989-RA,Eaffi15418-RA,Eaff17680-RA,Eaffi23452-RA,Eaff02890-RA,Egulf21938-RA,Eaffi05569-RA,Eaff09656-RA,Eaff1…
Molecular function	P-type potassium transmembrane transporter activity	GO:0008556	9	1.11022e-16	4.24992	32	34	2671	12061	Eaff17998-RA,Egulf21938-RA,Egulf18406-RA,Eaffi21837-RA,Eaffi05864-RA,Eaff19987-RA,Egulf07745-RA,Eaffi07240-RA,Eaffi18038-RA,Egulf18400-RA,Eaff09762-RA,Egulf04479-RA,Eaff09487-RA,Eaff12348-RA,Eaff05782-RA,Eaff18149-RA,Eaff16080-RA,Eaff01559-RA,Egulf18367-RA,Eaff09732-RA,Egulf15768-RA,Egulf01323-RA,Egulf09502-RA,Eaff09765-RA,Egulf14045-RA,Eaffi10227-RA,Egulf18404-RA,Egulf19507-RA,Eaff08954-RA,Eaffi…
Molecular function	transporter activity	GO:0005215	2	1.11022e-16	1.48521	471	1432	2671	12061	Eaff06489-RA,Eaff15515-RA,Eaffi04572-RA,Eaff07460-RA,Eaff17478-RA,Egulf13360-RA,Eaffi06167-RA,Eaff10158-RA,Egulf09425-RA,Eaffi15139-RA,Egulf04654-RA,Eaff17998-RA,Eaff13715-RA,Eaff04677-RA,Eaff09690-RA,Eaffi00389-RA,Egulf02334-RA,Egulf18921-RA,Eaff16419-RA,Eaff03123-RA,Eaff16308-RA,Eaff10441-RA,Eaff11639-RA,Egulf21938-RA,Eaff04805-RA,Egulf07470-RA,Eaffi20233-RA,Eaff12097-RA,Egulf13205-RA,Eaff13502…
Molecular function	monoatomic cation channel activity	GO:0005261	7	1.11022e-16	2.16599	177	369	2671	12061	Eaff06489-RA,Egulf13360-RA,Eaffi06167-RA,Egulf09425-RA,Egulf02334-RA,Egulf18921-RA,Eaff16308-RA,Eaff11639-RA,Egulf07470-RA,Eaffi20233-RA,Eaff16598-RA,Eaff15089-RA,Eaffi16810-RA,Eaff02324-RA,Egulf05955-RA,Eaff00486-RA,Eaff11087-RA,Egulf00537-RA,Eaff10561-RA,Eaff03120-RA,Egulf13623-RA,Eaff20005-RA,Egulf16606-RA,Egulf01295-RA,Egulf17829-RA,Eaff13349-RA,Egulf06586-RA,Eaff14897-RA,Egulf10123-RA,Eaff05…
Molecular function	P-type sodium:potassium-exchanging transporter activity	GO:0005391	10	1.11022e-16	4.24992	32	34	2671	12061	Eaff17998-RA,Egulf21938-RA,Egulf18406-RA,Eaffi21837-RA,Eaffi05864-RA,Eaff19987-RA,Egulf07745-RA,Eaffi07240-RA,Eaffi18038-RA,Egulf18400-RA,Eaff09762-RA,Egulf04479-RA,Eaff09487-RA,Eaff12348-RA,Eaff05782-RA,Eaff18149-RA,Eaff16080-RA,Eaff01559-RA,Egulf18367-RA,Eaff09732-RA,Egulf15768-RA,Egulf01323-RA,Egulf09502-RA,Eaff09765-RA,Egulf14045-RA,Eaffi10227-RA,Egulf18404-RA,Egulf19507-RA,Eaff08954-RA,Eaffi…
Molecular function	wide pore channel activity	GO:0022829	6	1.11022e-16	3.99948	31	35	2671	12061	Egulf04654-RA,Eaffi03766-RA,Eaff12204-RA,Egulf17829-RA,Egulf17966-RA,Eaff14897-RA,Egulf05598-RA,Eaff05741-RA,Eaff12203-RA,Egulf05945-RA,Egulf11353-RA,Eaff17232-RA,Eaff03321-RA,Eaffi05274-RA,Eaff14985-RA,Eaff14896-RA,Egulf21983-RA,Eaff12200-RA,Eaffi21805-RA,Eaff16467-RA,Eaff11103-RA,Eaffi13415-RA,Egulf05949-RA,Egulf05597-RA,Eaff14984-RA,Eaffi05782-RA,Egulf21680-RA,Eaff11110-RA,Eaff04966-RA,Egulf18…
Molecular function	voltage-gated monoatomic cation channel activity	GO:0022843	9	1.11022e-16	2.56438	92	162	2671	12061	Eaff06489-RA,Egulf13360-RA,Eaffi06167-RA,Egulf09425-RA,Eaff16308-RA,Eaff11639-RA,Eaffi20233-RA,Eaff16598-RA,Eaffi16810-RA,Eaff02324-RA,Eaff11087-RA,Egulf00537-RA,Eaff03120-RA,Egulf13623-RA,Eaff20005-RA,Eaff13349-RA,Eaff12671-RA,Egulf09416-RA,Eaff19403-RA,Egulf18099-RA,Egulf19307-RA,Eaffi18104-RA,Eaff15766-RA,Egulf14970-RA,Egulf05093-RA,Eaffi18296-RA,Egulf04030-RA,Egulf13735-RA,Eaffi15959-RA,Egulf…
Molecular function	monoatomic ion transmembrane transporter activity	GO:0015075	4	1.11022e-16	1.71264	388	1023	2671	12061	Eaff06489-RA,Eaff15515-RA,Eaffi04572-RA,Eaff07460-RA,Eaff17478-RA,Egulf13360-RA,Eaffi06167-RA,Eaff10158-RA,Egulf09425-RA,Eaffi15139-RA,Eaff17998-RA,Eaff13715-RA,Eaff04677-RA,Eaff09690-RA,Egulf02334-RA,Egulf18921-RA,Eaff03123-RA,Eaff16308-RA,Eaff11639-RA,Egulf21938-RA,Egulf07470-RA,Eaffi20233-RA,Eaff12097-RA,Eaff13502-RA,Egulf10934-RA,Egulf06466-RA,Eaff02648-RA,Eaff16598-RA,Eaff16787-RA,Eaff15089-…
Molecular function	potassium ion transmembrane transporter activity	GO:0015079	7	1.11022e-16	2.65198	111	189	2671	12061	Eaff06489-RA,Egulf09425-RA,Eaff17998-RA,Eaff16308-RA,Egulf21938-RA,Eaff15089-RA,Eaffi16810-RA,Eaff02324-RA,Eaff00486-RA,Eaff10561-RA,Eaff03120-RA,Egulf13623-RA,Egulf18406-RA,Eaffi21837-RA,Egulf01295-RA,Eaff13349-RA,Eaffi05864-RA,Eaff19987-RA,Egulf07745-RA,Eaffi07240-RA,Egulf09416-RA,Eaff19403-RA,Egulf18099-RA,Egulf19307-RA,Eaffi18104-RA,Eaffi18038-RA,Egulf14970-RA,Egulf18400-RA,Egulf04530-RA,Eaff…
Molecular function	calcium channel activity	GO:0005262	8	2.22045e-16	2.76406	101	165	2671	12061	Egulf13360-RA,Eaffi06167-RA,Egulf02334-RA,Eaff11639-RA,Eaffi20233-RA,Eaff16598-RA,Eaff11087-RA,Egulf00537-RA,Eaff10561-RA,Eaff03120-RA,Eaff20005-RA,Egulf16606-RA,Egulf01295-RA,Eaff12371-RA,Eaff12943-RA,Eaff12671-RA,Egulf09416-RA,Eaff03814-RA,Egulf18192-RA,Eaff15766-RA,Egulf19242-RA,Egulf09620-RA,Eaff01680-RA,Egulf04530-RA,Egulf05093-RA,Eaffi18296-RA,Eaff10566-RA,Egulf04030-RA,Eaffi06805-RA,Eaffi1…
Molecular function	inorganic molecular entity transmembrane transporter activity	GO:0015318	4	2.22045e-16	1.69333	366	976	2671	12061	Eaff06489-RA,Eaff15515-RA,Eaffi04572-RA,Eaff07460-RA,Eaff17478-RA,Egulf13360-RA,Eaffi06167-RA,Eaff10158-RA,Egulf09425-RA,Eaff17998-RA,Eaff13715-RA,Eaff04677-RA,Egulf02334-RA,Egulf18921-RA,Eaff03123-RA,Eaff16308-RA,Eaff11639-RA,Egulf21938-RA,Egulf07470-RA,Eaffi20233-RA,Eaff12097-RA,Eaff13502-RA,Egulf10934-RA,Egulf06466-RA,Eaff02648-RA,Eaff16598-RA,Eaff16787-RA,Eaff15089-RA,Eaffi16810-RA,Egulf00886…
Molecular function	microfilament motor activity	GO:0000146	3	3.33067e-16	3.69453	63	77	2671	12061	Egulf18131-RA,Eaffi18953-RA,Eaff17998-RA,Eaffi19653-RA,Eaffi12832-RA,Eaff13293-RA,Egulf07727-RA,Eaffi12946-RA,Eaff02890-RA,Eaffi23121-RA,Egulf00432-RA,Eaffi08671-RA,Eaffi21583-RA,Eaffi15214-RA,Eaff15663-RA,Eaffi02248-RA,Egulf14314-RA,Eaffi24006-RA,Eaffi12661-RA,Eaff04392-RA,Eaffi08670-RA,Egulf20022-RA,Eaffi04589-RA,Eaffi13100-RA,Eaffi13522-RA,Eaffi09054-RA,Eaffi23123-RA,Egulf11145-RA,Egulf11811-R…
Molecular function	ankyrin binding	GO:0030506	5	3.33067e-16	3.26987	42	58	2671	12061	Egulf21938-RA,Eaffi02849-RA,Egulf03616-RA,Egulf18406-RA,Eaffi21837-RA,Eaffi05864-RA,Egulf14236-RA,Eaff19987-RA,Egulf07745-RA,Eaffi07240-RA,Egulf22296-RA,Eaffi18038-RA,Egulf18400-RA,Eaff01680-RA,Eaff09762-RA,Eaffi24131-RA,Egulf00082-RA,Egulf04479-RA,Eaff12348-RA,Egulf14879-RA,Eaff13076-RA,Eaff05782-RA,Eaff15916-RA,Eaffi21202-RA,Eaff01559-RA,Eaffi18458-RA,Egulf22300-RA,Eaff17861-RA,Eaff07830-RA,Egu…
Molecular function	neurotransmitter receptor activity	GO:0030594	4	3.33067e-16	2.51954	77	138	2671	12061	Egulf13360-RA,Eaff10158-RA,Egulf07470-RA,Eaff13502-RA,Egulf10934-RA,Eaff16598-RA,Eaff16787-RA,Eaff00486-RA,Eaff01648-RA,Eaffi01328-RA,Eaff03120-RA,Egulf01295-RA,Eaff04968-RA,Egulf02145-RA,Egulf01899-RA,Eaffi13417-RA,Egulf09416-RA,Egulf10849-RA,Egulf18192-RA,Egulf16156-RA,Egulf19242-RA,Eaff04548-RA,Egulf02856-RA,Egulf04530-RA,Eaff14433-RA,Eaff10566-RA,Eaffi15959-RA,Eaffi06391-RA,Egulf18239-RA,Egul…
Molecular function	actin binding	GO:0003779	5	3.33067e-16	1.86107	190	461	2671	12061	Eaffi21345-RA,Egulf06159-RA,Egulf18131-RA,Eaffi18953-RA,Eaff08581-RA,Eaff17998-RA,Egulf14305-RA,Eaffi19653-RA,Eaffi12832-RA,Eaff13293-RA,Egulf21488-RA,Egulf07727-RA,Eaffi12946-RA,Eaff17989-RA,Eaffi15418-RA,Eaff17680-RA,Eaff02890-RA,Eaffi05569-RA,Eaff09656-RA,Eaff10212-RA,Eaffi23121-RA,Egulf05014-RA,Egulf11514-RA,Egulf19416-RA,Egulf00537-RA,Egulf00432-RA,Eaffi02849-RA,Eaffi08671-RA,Eaff13289-RA,Eg…
Molecular function	monoatomic cation transmembrane transporter activity	GO:0008324	5	4.44089e-16	1.78335	312	790	2671	12061	Eaff06489-RA,Eaff15515-RA,Eaffi04572-RA,Eaff17478-RA,Egulf13360-RA,Eaffi06167-RA,Egulf09425-RA,Eaff17998-RA,Eaff13715-RA,Eaff04677-RA,Egulf02334-RA,Egulf18921-RA,Eaff03123-RA,Eaff16308-RA,Eaff11639-RA,Egulf21938-RA,Egulf07470-RA,Eaffi20233-RA,Eaff12097-RA,Egulf06466-RA,Eaff02648-RA,Eaff16598-RA,Eaff15089-RA,Eaffi16810-RA,Egulf00886-RA,Eaff02324-RA,Egulf05955-RA,Eaff00486-RA,Eaff11087-RA,Egulf0053…
Molecular function	high voltage-gated calcium channel activity	GO:0008331	11	4.44089e-16	4.51554	26	26	2671	12061	Eaffi06167-RA,Eaffi20233-RA,Eaff11087-RA,Egulf00537-RA,Eaff12671-RA,Eaff15766-RA,Eaffi18296-RA,Egulf14908-RA,Eaffi05023-RA,Eaff08233-RA,Eaffi03176-RA,Eaff15736-RA,Eaff06204-RA,Egulf05959-RA,Egulf08312-RA,Eaffi08938-RA,Egulf18650-RA,Eaff17885-RA,Egulf14505-RA,Eaff09988-RA,Eaffi20721-RA,Egulf05728-RA,Eaffi10354-RA,Egulf14503-RA,Eaffi18487-RA,Egulf04090-RA,
Molecular function	structural constituent of cytoskeleton	GO:0005200	3	4.44089e-16	2.63136	81	139	2671	12061	Egulf15820-RA,Eaffi21676-RA,Egulf14468-RA,Eaff17680-RA,Eaff05626-RA,Eaff05180-RA,Eaff11035-RA,Egulf13954-RA,Eaff12603-RA,Eaffi02849-RA,Eaff04981-RA,Eaffi03609-RA,Egulf00181-RA,Egulf07505-RA,Eaff14106-RA,Eaffi12714-RA,Eaff18111-RA,Egulf02238-RA,Eaffi05191-RA,Eaffi03711-RA,Egulf22296-RA,Egulf22158-RA,Eaff16646-RA,Egulf13362-RA,Eaffi07840-RA,Eaffi11705-RA,Eaff17432-RA,Egulf05016-RA,Egulf00184-RA,Eaf…
Molecular function	passive transmembrane transporter activity	GO:0022803	4	4.44089e-16	2.19945	264	542	2671	12061	Eaff06489-RA,Eaff07460-RA,Egulf13360-RA,Eaffi06167-RA,Eaff10158-RA,Egulf09425-RA,Egulf04654-RA,Eaff13715-RA,Egulf02334-RA,Egulf18921-RA,Eaff16308-RA,Eaff11639-RA,Egulf07470-RA,Eaffi20233-RA,Eaff13502-RA,Egulf10934-RA,Eaff02648-RA,Eaff16598-RA,Eaff16787-RA,Eaff15089-RA,Eaffi16810-RA,Eaff02324-RA,Egulf05955-RA,Eaff00486-RA,Eaff11087-RA,Egulf00537-RA,Eaffi03766-RA,Eaff10561-RA,Eaff01648-RA,Egulf0361…
Molecular function	calcium ion transmembrane transporter activity	GO:0015085	7	4.44089e-16	2.269	101	201	2671	12061	Egulf13360-RA,Eaffi06167-RA,Egulf02334-RA,Eaff11639-RA,Eaffi20233-RA,Eaff16598-RA,Eaff11087-RA,Egulf00537-RA,Eaff10561-RA,Eaff03120-RA,Eaff20005-RA,Egulf16606-RA,Egulf01295-RA,Eaff12371-RA,Eaff12943-RA,Eaff12671-RA,Egulf09416-RA,Eaff03814-RA,Egulf18192-RA,Eaff15766-RA,Egulf19242-RA,Egulf09620-RA,Eaff01680-RA,Egulf04530-RA,Egulf05093-RA,Eaffi18296-RA,Eaff10566-RA,Egulf04030-RA,Eaffi06805-RA,Eaffi1…
Molecular function	channel activity	GO:0015267	5	4.44089e-16	2.19945	264	542	2671	12061	Eaff06489-RA,Eaff07460-RA,Egulf13360-RA,Eaffi06167-RA,Eaff10158-RA,Egulf09425-RA,Egulf04654-RA,Eaff13715-RA,Egulf02334-RA,Egulf18921-RA,Eaff16308-RA,Eaff11639-RA,Egulf07470-RA,Eaffi20233-RA,Eaff13502-RA,Egulf10934-RA,Eaff02648-RA,Eaff16598-RA,Eaff16787-RA,Eaff15089-RA,Eaffi16810-RA,Eaff02324-RA,Egulf05955-RA,Eaff00486-RA,Eaff11087-RA,Egulf00537-RA,Eaffi03766-RA,Eaff10561-RA,Eaff01648-RA,Egulf0361…
Molecular function	gated channel activity	GO:0022836	6	5.55112e-16	2.42626	180	335	2671	12061	Eaff06489-RA,Eaff07460-RA,Egulf13360-RA,Eaffi06167-RA,Eaff10158-RA,Egulf09425-RA,Eaff16308-RA,Eaff11639-RA,Egulf07470-RA,Eaffi20233-RA,Eaff13502-RA,Egulf10934-RA,Eaff16598-RA,Eaff16787-RA,Eaff15089-RA,Eaffi16810-RA,Eaff02324-RA,Eaff00486-RA,Eaff11087-RA,Egulf00537-RA,Eaff01648-RA,Eaffi01328-RA,Eaff03120-RA,Egulf13623-RA,Eaff20005-RA,Egulf01295-RA,Egulf17829-RA,Eaff13349-RA,Eaff04968-RA,Egulf02145…
Molecular function	monoatomic ion gated channel activity	GO:0022839	7	5.55112e-16	2.42626	180	335	2671	12061	Eaff06489-RA,Eaff07460-RA,Egulf13360-RA,Eaffi06167-RA,Eaff10158-RA,Egulf09425-RA,Eaff16308-RA,Eaff11639-RA,Egulf07470-RA,Eaffi20233-RA,Eaff13502-RA,Egulf10934-RA,Eaff16598-RA,Eaff16787-RA,Eaff15089-RA,Eaffi16810-RA,Eaff02324-RA,Eaff00486-RA,Eaff11087-RA,Egulf00537-RA,Eaff01648-RA,Eaffi01328-RA,Eaff03120-RA,Egulf13623-RA,Eaff20005-RA,Egulf01295-RA,Egulf17829-RA,Eaff13349-RA,Eaff04968-RA,Egulf02145…
Molecular function	molecular transducer activity	GO:0060089	2	9.99201e-16	1.73612	213	554	2671	12061	Egulf20802-RA,Eaffi04572-RA,Eaff01580-RA,Eaff07460-RA,Eaff11702-RA,Egulf13360-RA,Eaff10158-RA,Eaff10707-RA,Egulf04654-RA,Eaff16534-RA,Eaff18894-RA,Egulf16154-RA,Egulf18372-RA,Eaff07423-RA,Egulf17362-RA,Eaffi20515-RA,Eaff10384-RA,Eaff11639-RA,Eaff03216-RA,Egulf07470-RA,Eaff12097-RA,Eaff13502-RA,Egulf10934-RA,Eaff16598-RA,Eaff16787-RA,Eaffi04076-RA,Egulf19357-RA,Egulf10298-RA,Eaff00486-RA,Eaffi0376…
Molecular function	cytoskeletal motor activity	GO:0003774	2	1.55431e-15	2.18494	90	186	2671	12061	Egulf18131-RA,Eaffi18953-RA,Egulf01364-RA,Eaff17998-RA,Eaffi19653-RA,Eaffi12832-RA,Eaff13293-RA,Egulf07727-RA,Egulf10541-RA,Eaffi12946-RA,Eaff02890-RA,Eaffi23121-RA,Egulf00432-RA,Eaffi08671-RA,Eaffi21583-RA,Eaffi15214-RA,Eaff15663-RA,Eaffi02248-RA,Egulf14314-RA,Eaffi24006-RA,Eaff08392-RA,Eaffi12661-RA,Egulf03789-RA,Eaff04392-RA,Eaffi08670-RA,Egulf20022-RA,Eaff16556-RA,Eaffi04589-RA,Egulf05152-RA,…
Molecular function	sodium ion transmembrane transporter activity	GO:0015081	7	1.88738e-15	2.10867	99	212	2671	12061	Eaff17478-RA,Eaff17998-RA,Eaff04677-RA,Egulf21938-RA,Egulf06466-RA,Eaff00486-RA,Eaff10561-RA,Eaff03120-RA,Egulf02095-RA,Egulf18406-RA,Eaffi21837-RA,Egulf01295-RA,Egulf20268-RA,Eaffi05864-RA,Eaff00425-RA,Egulf16610-RA,Eaff19987-RA,Egulf10123-RA,Egulf07745-RA,Eaff10850-RA,Eaffi02118-RA,Eaffi07240-RA,Egulf09416-RA,Egulf11029-RA,Eaffi18038-RA,Egulf18400-RA,Egulf04530-RA,Eaffi06805-RA,Eaff09762-RA,Egu…
Molecular function	pre-mRNA binding	GO:0036002	6	6.55032e-15	2.58031	60	105	2671	12061	Eaff18587-RA,Eaff18703-RA,Egulf07306-RA,Egulf18552-RA,Eaffi16011-RA,Eaff15146-RA,Eaff19614-RA,Eaffi01285-RA,Eaffi06050-RA,Egulf15213-RA,Eaffi02155-RA,Egulf21377-RA,Egulf13675-RA,Eaffi09601-RA,Eaffi06013-RA,Egulf04607-RA,Eaffi15366-RA,Eaffi19879-RA,Egulf10874-RA,Egulf17630-RA,Eaff12808-RA,Eaff17428-RA,Egulf12171-RA,Eaffi20077-RA,Eaff16485-RA,Egulf15211-RA,Egulf13489-RA,Egulf18551-RA,Eaff09864-RA,E…
Molecular function	kainate selective glutamate receptor activity	GO:0015277	12	1.70974e-14	4.51554	21	21	2671	12061	Eaff00486-RA,Eaff03120-RA,Egulf01295-RA,Egulf09416-RA,Egulf04530-RA,Egulf17008-RA,Egulf10471-RA,Egulf01294-RA,Egulf01081-RA,Eaff16050-RA,Eaff04144-RA,Eaff08927-RA,Eaff01920-RA,Eaff12302-RA,Egulf09415-RA,Eaffi03621-RA,Egulf06523-RA,Egulf08016-RA,Eaffi08153-RA,Egulf14076-RA,Eaff08743-RA,
Molecular function	potassium ion binding	GO:0030955	7	3.05311e-14	3.83136	28	33	2671	12061	Egulf21938-RA,Eaff10561-RA,Egulf18406-RA,Eaffi21837-RA,Eaffi05864-RA,Eaff19987-RA,Egulf07745-RA,Eaffi07240-RA,Eaffi18038-RA,Egulf18400-RA,Eaffi06805-RA,Eaff09762-RA,Egulf04479-RA,Eaff12348-RA,Eaff05782-RA,Egulf19178-RA,Eaff01559-RA,Egulf09502-RA,Eaffi06909-RA,Eaff09765-RA,Eaff10492-RA,Egulf18404-RA,Egulf19507-RA,Eaffi06809-RA,Egulf19246-RA,Eaffi23876-RA,Egulf19177-RA,Eaffi01721-RA,
Molecular function	protein dimerization activity	GO:0046983	4	4.09672e-14	1.33084	486	1649	2671	12061	Eaffi21345-RA,Eaffi21906-RA,Eaff06489-RA,Egulf20802-RA,Egulf01045-RA,Eaff12123-RA,Eaff18587-RA,Eaff01580-RA,Eaff01338-RA,Egulf01708-RA,Egulf06159-RA,Eaffi16694-RA,Eaff04731-RA,Egulf13360-RA,Egulf18131-RA,Egulf09425-RA,Eaff08581-RA,Eaff14623-RA,Egulf20904-RA,Eaff14226-RA,Eaff16534-RA,Egulf01655-RA,Egulf13179-RA,Eaff17998-RA,Eaffi19653-RA,Eaffi12832-RA,Eaff13293-RA,Egulf18372-RA,Egulf07727-RA,Eaffi…
Molecular function	steroid hormone binding	GO:1990239	5	7.61613e-14	4.51554	20	20	2671	12061	Egulf21938-RA,Egulf18406-RA,Eaffi21837-RA,Eaffi05864-RA,Eaff19987-RA,Egulf07745-RA,Eaffi07240-RA,Eaffi18038-RA,Egulf18400-RA,Eaff09762-RA,Egulf04479-RA,Eaff12348-RA,Eaff05782-RA,Eaff01559-RA,Egulf09502-RA,Eaff09765-RA,Egulf18404-RA,Egulf19507-RA,Eaffi23876-RA,Eaffi01721-RA,
Molecular function	amyloid-beta binding	GO:0001540	5	1.20681e-13	2.87947	44	69	2671	12061	Eaffi06179-RA,Egulf21938-RA,Egulf18406-RA,Egulf19943-RA,Eaffi05864-RA,Eaff19987-RA,Egulf07745-RA,Eaffi07240-RA,Egulf18192-RA,Eaffi18038-RA,Egulf19242-RA,Egulf18400-RA,Egulf16620-RA,Eaff10566-RA,Eaff09762-RA,Egulf18239-RA,Eaff01192-RA,Egulf11950-RA,Egulf04479-RA,Eaff12348-RA,Eaff09795-RA,Eaff09544-RA,Eaff05782-RA,Eaff10560-RA,Eaff09600-RA,Eaffi05420-RA,Egulf18655-RA,Eaff01559-RA,Egulf01081-RA,Egul…
Molecular function	voltage-gated calcium channel activity	GO:0005245	10	1.24678e-13	3.11983	38	55	2671	12061	Eaffi06167-RA,Eaff11639-RA,Eaffi20233-RA,Eaff11087-RA,Egulf00537-RA,Eaff20005-RA,Eaff12671-RA,Eaff15766-RA,Egulf05093-RA,Eaffi18296-RA,Egulf04030-RA,Egulf14908-RA,Eaffi05023-RA,Eaff08233-RA,Eaffi03176-RA,Eaff15736-RA,Eaff06204-RA,Egulf05959-RA,Egulf08312-RA,Egulf05346-RA,Eaffi08938-RA,Eaffi03115-RA,Eaffi04579-RA,Egulf18650-RA,Eaff17885-RA,Egulf14505-RA,Eaff02396-RA,Eaff11833-RA,Eaff09988-RA,Eaffi…
Molecular function	transmembrane signaling receptor activity	GO:0004888	4	1.25122e-13	1.76156	142	364	2671	12061	Egulf20802-RA,Eaff07460-RA,Egulf13360-RA,Eaff10707-RA,Eaff16534-RA,Eaff18894-RA,Egulf16154-RA,Eaff07423-RA,Egulf17362-RA,Eaff10384-RA,Eaff11639-RA,Eaff03216-RA,Egulf07470-RA,Eaff13502-RA,Eaff16598-RA,Eaff16787-RA,Eaffi04076-RA,Egulf10298-RA,Eaff00486-RA,Eaff01648-RA,Eaffi01328-RA,Eaff03120-RA,Egulf01295-RA,Egulf04927-RA,Egulf15225-RA,Eaff07643-RA,Eaff18857-RA,Egulf13427-RA,Eaffi01325-RA,Egulf0941…
Molecular function	P-type sodium:potassium-exchanging transporter activity involved in regulation of cardiac muscle cell membrane potential	GO:0086037	11	3.46057e-13	4.51554	19	19	2671	12061	Egulf21938-RA,Egulf18406-RA,Eaffi05864-RA,Eaff19987-RA,Egulf07745-RA,Eaffi07240-RA,Eaffi18038-RA,Egulf18400-RA,Eaff09762-RA,Egulf04479-RA,Eaff12348-RA,Eaff05782-RA,Eaff01559-RA,Egulf09502-RA,Eaff09765-RA,Egulf18404-RA,Egulf19507-RA,Eaffi23876-RA,Eaffi01721-RA,
Molecular function	ionotropic glutamate receptor activity	GO:0004970	11	4.46865e-13	3.78722	26	31	2671	12061	Egulf13360-RA,Eaff16598-RA,Eaff00486-RA,Eaff03120-RA,Egulf01295-RA,Egulf09416-RA,Egulf04530-RA,Eaffi15959-RA,Egulf17008-RA,Egulf10471-RA,Egulf01294-RA,Egulf01081-RA,Eaff16050-RA,Eaff04144-RA,Eaff08927-RA,Eaff01920-RA,Eaff16597-RA,Eaff12302-RA,Egulf09415-RA,Eaffi03621-RA,Egulf06523-RA,Egulf08016-RA,Eaffi08153-RA,Eaffi15958-RA,Egulf14076-RA,Eaff08743-RA,
Molecular function	delayed rectifier potassium channel activity	GO:0005251	11	1.03839e-12	3.99451	23	26	2671	12061	Eaff06489-RA,Egulf09425-RA,Eaff02324-RA,Egulf13623-RA,Eaff13349-RA,Eaff19403-RA,Eaffi18104-RA,Egulf14970-RA,Egulf08386-RA,Egulf04910-RA,Egulf03276-RA,Egulf19251-RA,Eaff03131-RA,Egulf04523-RA,Eaffi09942-RA,Eaff17938-RA,Egulf16856-RA,Eaff12309-RA,Eaffi24088-RA,Eaffi19331-RA,Eaffi19868-RA,Eaff12000-RA,Eaff10567-RA,
Molecular function	amino acid:sodium symporter activity	GO:0005283	10	1.03839e-12	3.99451	23	26	2671	12061	Egulf06466-RA,Egulf02095-RA,Egulf20268-RA,Eaff00425-RA,Egulf16610-RA,Eaff10850-RA,Eaffi02118-RA,Eaffi01162-RA,Eaff01053-RA,Eaff19211-RA,Egulf21912-RA,Eaff14243-RA,Egulf07189-RA,Egulf07190-RA,Eaff07294-RA,Egulf20267-RA,Eaff00740-RA,Eaffi00430-RA,Eaff18036-RA,Egulf21655-RA,Eaff06001-RA,Egulf15113-RA,Egulf19575-RA,
Molecular function	ligand-gated monoatomic anion channel activity	GO:0099095	9	1.56919e-12	3.38665	30	40	2671	12061	Eaff10158-RA,Egulf07470-RA,Eaff13502-RA,Egulf10934-RA,Eaff16787-RA,Eaff01648-RA,Eaffi01328-RA,Eaff04968-RA,Egulf02145-RA,Egulf01899-RA,Eaffi13417-RA,Egulf10849-RA,Eaff04548-RA,Egulf02856-RA,Eaff14433-RA,Eaffi06391-RA,Egulf11685-RA,Eaff01292-RA,Eaff04595-RA,Eaff05258-RA,Egulf20678-RA,Egulf13030-RA,Egulf11354-RA,Eaffi16722-RA,Egulf10869-RA,Eaff07012-RA,Egulf07844-RA,Egulf18832-RA,Eaffi13744-RA,Egul…
Molecular function	transforming growth factor beta binding	GO:0050431	5	4.17866e-12	3.97367	22	25	2671	12061	Egulf20802-RA,Egulf16154-RA,Eaff11639-RA,Eaff18857-RA,Eaffi20926-RA,Egulf04030-RA,Egulf08691-RA,Eaff01192-RA,Egulf11950-RA,Egulf06374-RA,Eaff02009-RA,Egulf05346-RA,Eaffi03115-RA,Eaffi04579-RA,Egulf20876-RA,Egulf20016-RA,Eaff07515-RA,Eaff12726-RA,Eaff07111-RA,Eaff00345-RA,Eaff07178-RA,Eaff17575-RA,
Molecular function	glycine-gated chloride ion channel activity	GO:0022852	11	7.12308e-12	4.51554	17	17	2671	12061	Eaff10158-RA,Egulf07470-RA,Egulf10934-RA,Eaff04968-RA,Egulf02145-RA,Egulf01899-RA,Eaffi13417-RA,Eaff04548-RA,Eaff14433-RA,Eaffi06391-RA,Eaff04595-RA,Egulf20678-RA,Egulf11354-RA,Egulf10869-RA,Eaff07012-RA,Egulf18832-RA,Egulf21404-RA,
Molecular function	heparan sulfate proteoglycan binding	GO:0043395	5	1.02943e-11	3.1814	31	44	2671	12061	Egulf21938-RA,Eaff03977-RA,Egulf18406-RA,Egulf04927-RA,Eaffi05864-RA,Eaff19987-RA,Egulf07745-RA,Eaffi07240-RA,Eaffi18038-RA,Egulf18400-RA,Eaff09762-RA,Eaff11986-RA,Eaffi04079-RA,Egulf04479-RA,Eaff12348-RA,Eaff05782-RA,Egulf04928-RA,Eaff11984-RA,Eaff01559-RA,Egulf20876-RA,Egulf09502-RA,Eaff03976-RA,Eaff09765-RA,Egulf10293-RA,Eaff03778-RA,Egulf18404-RA,Egulf19507-RA,Eaffi23876-RA,Eaff07178-RA,Eaffi…
Molecular function	organic acid binding	GO:0043177	4	1.44552e-11	1.81293	108	269	2671	12061	Eaff12123-RA,Egulf13360-RA,Eaffi23551-RA,Eaff10158-RA,Eaff07804-RA,Egulf16866-RA,Egulf05101-RA,Eaffi12423-RA,Eaff04805-RA,Egulf13564-RA,Egulf10934-RA,Eaff16598-RA,Eaff12733-RA,Egulf19357-RA,Eaffi07931-RA,Egulf21604-RA,Eaff03120-RA,Egulf02644-RA,Eaff10663-RA,Eaff20005-RA,Eaff11796-RA,Egulf00032-RA,Eaff04968-RA,Eaffi03890-RA,Egulf05810-RA,Egulf06761-RA,Egulf02145-RA,Eaff11236-RA,Egulf01899-RA,Eaffi…
Molecular function	ATPase-coupled intramembrane lipid transporter activity	GO:0140326	5	2.14527e-11	3.82084	22	26	2671	12061	Eaff09690-RA,Eaff16419-RA,Eaffi01694-RA,Eaff09367-RA,Egulf07721-RA,Eaff12436-RA,Eaff12110-RA,Egulf01764-RA,Eaff01792-RA,Egulf18312-RA,Eaffi00359-RA,Eaffi03497-RA,Egulf01765-RA,Egulf04379-RA,Egulf08159-RA,Egulf04769-RA,Eaff01542-RA,Eaffi07544-RA,Eaffi05757-RA,Egulf04378-RA,Eaffi07546-RA,Eaff18076-RA,
Molecular function	protein homodimerization activity	GO:0042803	5	3.01216e-11	1.34295	367	1234	2671	12061	Eaffi21345-RA,Eaffi21906-RA,Egulf01045-RA,Eaff12123-RA,Eaff18587-RA,Eaff01580-RA,Eaff01338-RA,Egulf01708-RA,Egulf06159-RA,Eaffi16694-RA,Eaff04731-RA,Egulf18131-RA,Eaff08581-RA,Eaff14623-RA,Egulf20904-RA,Eaff14226-RA,Egulf01655-RA,Eaff17998-RA,Eaffi19653-RA,Eaffi12832-RA,Eaff13293-RA,Egulf18372-RA,Egulf07727-RA,Eaffi12946-RA,Eaffi13736-RA,Eaff07714-RA,Eaff19173-RA,Eaff17989-RA,Egulf05137-RA,Egulf2…
Molecular function	benzodiazepine receptor activity	GO:0008503	5	3.23164e-11	4.51554	16	16	2671	12061	Egulf07470-RA,Eaff13502-RA,Eaff16787-RA,Eaff01648-RA,Eaffi01328-RA,Egulf10849-RA,Egulf02856-RA,Egulf11685-RA,Eaff01292-RA,Eaff05258-RA,Egulf20678-RA,Egulf13030-RA,Eaffi16722-RA,Eaff07012-RA,Egulf07844-RA,Eaffi13744-RA,
Molecular function	tachykinin receptor activity	GO:0004995	8	3.23164e-11	4.51554	16	16	2671	12061	Eaff18894-RA,Eaff07423-RA,Egulf10298-RA,Eaff07643-RA,Eaff16995-RA,Eaff04008-RA,Egulf01239-RA,Egulf20133-RA,Egulf09641-RA,Egulf10392-RA,Eaff03099-RA,Egulf10325-RA,Eaff18714-RA,Eaff03983-RA,Egulf13125-RA,Egulf19880-RA,
Molecular function	inhibitory extracellular ligand-gated monoatomic ion channel activity	GO:0005237	10	8.26337e-11	3.79305	21	25	2671	12061	Eaff10158-RA,Egulf07470-RA,Egulf10934-RA,Eaff01648-RA,Eaffi01328-RA,Eaff04968-RA,Egulf02145-RA,Egulf01899-RA,Eaffi13417-RA,Eaff04548-RA,Eaff14433-RA,Eaffi06391-RA,Eaff01292-RA,Eaff04595-RA,Egulf20678-RA,Egulf11354-RA,Egulf10869-RA,Eaff07012-RA,Egulf07844-RA,Egulf18832-RA,Egulf21404-RA,
Molecular function	amino acid:monoatomic cation symporter activity	GO:0005416	8	8.94954e-11	3.4959	24	31	2671	12061	Egulf06466-RA,Egulf02095-RA,Egulf20268-RA,Eaff00425-RA,Egulf16610-RA,Eaff10850-RA,Eaffi02118-RA,Eaffi01162-RA,Eaff01053-RA,Eaff19211-RA,Egulf21912-RA,Eaff14243-RA,Egulf07189-RA,Egulf07190-RA,Eaff07294-RA,Egulf20267-RA,Eaff00740-RA,Eaff05809-RA,Eaffi00430-RA,Eaff18036-RA,Egulf21655-RA,Eaff06001-RA,Egulf15113-RA,Egulf19575-RA,
Molecular function	extracellularly glycine-gated ion channel activity	GO:0016933	11	1.01535e-10	4.26467	17	18	2671	12061	Eaff10158-RA,Egulf07470-RA,Egulf10934-RA,Eaff04968-RA,Egulf02145-RA,Egulf01899-RA,Eaffi13417-RA,Eaff04548-RA,Eaff14433-RA,Eaffi06391-RA,Eaff04595-RA,Egulf20678-RA,Egulf11354-RA,Egulf10869-RA,Eaff07012-RA,Egulf18832-RA,Egulf21404-RA,
Molecular function	nitric-oxide synthase binding	GO:0050998	5	1.05637e-10	3.11787	29	42	2671	12061	Egulf21938-RA,Egulf18406-RA,Eaffi21837-RA,Eaffi05864-RA,Eaff19987-RA,Egulf07745-RA,Eaffi07240-RA,Eaffi18038-RA,Egulf18400-RA,Eaff09762-RA,Egulf04479-RA,Eaff09487-RA,Eaff12348-RA,Eaff05782-RA,Eaff18149-RA,Eaff16080-RA,Eaff13428-RA,Eaff01559-RA,Egulf18367-RA,Eaff09732-RA,Egulf15768-RA,Egulf01323-RA,Egulf09502-RA,Eaff09765-RA,Egulf18404-RA,Egulf19507-RA,Eaff08954-RA,Eaffi23876-RA,Eaffi01721-RA,
Molecular function	monoatomic anion channel activity	GO:0005253	7	1.31575e-10	2.32619	51	99	2671	12061	Eaff07460-RA,Eaff10158-RA,Egulf07470-RA,Eaff13502-RA,Egulf10934-RA,Eaff16787-RA,Eaff01648-RA,Eaffi01328-RA,Egulf17829-RA,Eaff04968-RA,Egulf02145-RA,Eaff14897-RA,Egulf01899-RA,Eaff05741-RA,Eaffi13417-RA,Egulf10849-RA,Eaff04548-RA,Egulf02856-RA,Eaff14433-RA,Eaffi06391-RA,Egulf11685-RA,Eaff01292-RA,Egulf01248-RA,Eaff04595-RA,Eaffi22638-RA,Eaff05258-RA,Egulf20678-RA,Egulf12865-RA,Eaff14896-RA,Egulf13…
Molecular function	sodium ion binding	GO:0031402	7	1.33997e-10	3.16088	28	40	2671	12061	Egulf21938-RA,Eaff10561-RA,Egulf18406-RA,Eaffi21837-RA,Eaffi05864-RA,Eaff19987-RA,Egulf07745-RA,Eaffi07240-RA,Eaffi18038-RA,Egulf18400-RA,Eaffi06805-RA,Eaff09762-RA,Egulf04479-RA,Eaff12348-RA,Eaff05782-RA,Egulf19178-RA,Eaff01559-RA,Egulf09502-RA,Eaffi06909-RA,Eaff09765-RA,Eaff10492-RA,Egulf18404-RA,Egulf19507-RA,Eaffi06809-RA,Egulf19246-RA,Eaffi23876-RA,Egulf19177-RA,Eaffi01721-RA,
Molecular function	carboxylic acid binding	GO:0031406	5	1.40313e-10	1.78199	103	261	2671	12061	Eaff12123-RA,Egulf13360-RA,Eaffi23551-RA,Eaff10158-RA,Eaff07804-RA,Egulf16866-RA,Egulf05101-RA,Eaffi12423-RA,Eaff04805-RA,Egulf13564-RA,Egulf10934-RA,Eaff16598-RA,Eaff12733-RA,Egulf19357-RA,Eaffi07931-RA,Egulf21604-RA,Eaff03120-RA,Egulf02644-RA,Eaff10663-RA,Eaff11796-RA,Egulf00032-RA,Eaff04968-RA,Eaffi03890-RA,Egulf05810-RA,Egulf06761-RA,Egulf02145-RA,Eaff11236-RA,Egulf01899-RA,Eaffi04301-RA,Eaff…
Molecular function	sulfur compound binding	GO:1901681	3	2.15773e-10	1.78152	101	256	2671	12061	Eaff01580-RA,Eaffi16694-RA,Eaff10158-RA,Eaff10707-RA,Egulf05101-RA,Eaff19173-RA,Eaff10441-RA,Egulf21938-RA,Egulf10934-RA,Eaff17367-RA,Eaff03977-RA,Eaffi17950-RA,Egulf18406-RA,Eaff20005-RA,Eaff11796-RA,Eaff04968-RA,Egulf04927-RA,Eaffi05864-RA,Egulf05810-RA,Egulf15225-RA,Egulf02145-RA,Eaff11236-RA,Egulf05413-RA,Egulf01899-RA,Eaff19987-RA,Egulf19131-RA,Eaff15853-RA,Eaffi04301-RA,Egulf07745-RA,Egulf1…
Molecular function	histone arginine N-methyltransferase activity	GO:0008469	9	4.35405e-10	4.24992	16	17	2671	12061	Eaffi16694-RA,Eaff17367-RA,Eaff02506-RA,Eaff15853-RA,Eaffi13655-RA,Eaff15344-RA,Egulf17307-RA,Eaff10511-RA,Eaffi23329-RA,Egulf17308-RA,Egulf19452-RA,Egulf11594-RA,Eaff05175-RA,Egulf14413-RA,Egulf07925-RA,Egulf12247-RA,
Molecular function	arginine N-methyltransferase activity	GO:0016273	7	4.35405e-10	4.24992	16	17	2671	12061	Eaffi16694-RA,Eaff17367-RA,Eaff02506-RA,Eaff15853-RA,Eaffi13655-RA,Eaff15344-RA,Egulf17307-RA,Eaff10511-RA,Eaffi23329-RA,Egulf17308-RA,Egulf19452-RA,Egulf11594-RA,Eaff05175-RA,Egulf14413-RA,Egulf07925-RA,Egulf12247-RA,
Molecular function	protein-arginine N-methyltransferase activity	GO:0016274	8	4.35405e-10	4.24992	16	17	2671	12061	Eaffi16694-RA,Eaff17367-RA,Eaff02506-RA,Eaff15853-RA,Eaffi13655-RA,Eaff15344-RA,Egulf17307-RA,Eaff10511-RA,Eaffi23329-RA,Egulf17308-RA,Egulf19452-RA,Egulf11594-RA,Eaff05175-RA,Egulf14413-RA,Egulf07925-RA,Egulf12247-RA,
Molecular function	alkanesulfonate binding	GO:0043210	5	6.64545e-10	4.51554	14	14	2671	12061	Eaff10158-RA,Egulf10934-RA,Eaff04968-RA,Egulf02145-RA,Egulf01899-RA,Eaffi13417-RA,Eaff04548-RA,Eaff14433-RA,Eaffi06391-RA,Eaff04595-RA,Egulf11354-RA,Egulf10869-RA,Egulf18832-RA,Egulf21404-RA,
Molecular function	taurine binding	GO:0030977	6	6.64545e-10	4.51554	14	14	2671	12061	Eaff10158-RA,Egulf10934-RA,Eaff04968-RA,Egulf02145-RA,Egulf01899-RA,Eaffi13417-RA,Eaff04548-RA,Eaff14433-RA,Eaffi06391-RA,Eaff04595-RA,Egulf11354-RA,Egulf10869-RA,Egulf18832-RA,Egulf21404-RA,
Molecular function	toxic substance binding	GO:0015643	3	7.63982e-10	4.04022	17	19	2671	12061	Egulf18192-RA,Egulf19242-RA,Eaff10566-RA,Egulf18239-RA,Eaffi07936-RA,Eaff09081-RA,Eaff09795-RA,Eaff09544-RA,Egulf01458-RA,Eaff10560-RA,Eaff09600-RA,Eaffi05420-RA,Egulf18432-RA,Eaff09082-RA,Eaffi19495-RA,Eaff09545-RA,Egulf19250-RA,
Molecular function	cGMP binding	GO:0030553	9	1.03494e-09	3.87046	18	21	2671	12061	Eaffi16810-RA,Eaff11504-RA,Eaffi08650-RA,Eaffi08649-RA,Eaff07985-RA,Eaff11503-RA,Eaff18470-RA,Eaffi04814-RA,Egulf19665-RA,Eaff08474-RA,Egulf00774-RA,Egulf00777-RA,Egulf05514-RA,Eaffi03605-RA,Egulf14548-RA,Eaffi04815-RA,Eaff08475-RA,Egulf00273-RA,
Molecular function	myosin light chain binding	GO:0032027	6	1.20791e-09	3.51208	21	27	2671	12061	Eaffi18953-RA,Eaff17998-RA,Eaff09599-RA,Eaffi08671-RA,Eaff15663-RA,Egulf14314-RA,Eaffi08670-RA,Eaffi05196-RA,Eaff10921-RA,Eaff08446-RA,Egulf19517-RA,Eaff10923-RA,Eaffi07254-RA,Eaffi10227-RA,Egulf19516-RA,Eaff10922-RA,Egulf19519-RA,Eaffi18954-RA,Egulf15056-RA,Eaffi05489-RA,Egulf00743-RA,
Molecular function	glutamate-gated calcium ion channel activity	GO:0022849	12	1.24928e-09	3.61243	20	25	2671	12061	Egulf13360-RA,Eaff16598-RA,Eaff03120-RA,Egulf01295-RA,Egulf09416-RA,Egulf04530-RA,Eaffi15959-RA,Egulf17008-RA,Egulf10471-RA,Egulf01294-RA,Eaff04144-RA,Eaff08927-RA,Eaff01920-RA,Eaff16597-RA,Eaff12302-RA,Egulf09415-RA,Eaffi03621-RA,Egulf08016-RA,Eaffi08153-RA,Eaffi15958-RA,
Molecular function	amino acid binding	GO:0016597	6	1.32844e-09	2.03199	63	140	2671	12061	Eaff12123-RA,Egulf13360-RA,Eaff10158-RA,Eaff07804-RA,Egulf16866-RA,Egulf10934-RA,Eaff16598-RA,Egulf21604-RA,Eaff03120-RA,Egulf00032-RA,Eaff04968-RA,Eaffi03890-RA,Egulf05810-RA,Egulf02145-RA,Eaff11236-RA,Egulf01899-RA,Eaffi14977-RA,Eaff00672-RA,Egulf16277-RA,Eaffi13417-RA,Egulf09416-RA,Eaff04548-RA,Eaff14433-RA,Egulf19785-RA,Eaff12976-RA,Eaffi15959-RA,Eaffi06391-RA,Eaffi00679-RA,Eaff12122-RA,Egulf…
Molecular function	filamin binding	GO:0031005	5	1.86033e-09	4.23332	15	16	2671	12061	Eaff01580-RA,Eaff01338-RA,Eaffi01840-RA,Eaffi17950-RA,Egulf05810-RA,Eaff11236-RA,Egulf16277-RA,Egulf07507-RA,Eaff19409-RA,Eaffi05099-RA,Eaff01581-RA,Eaff18958-RA,Egulf07766-RA,Egulf07853-RA,Eaffi01745-RA,
Molecular function	ATPase-coupled transmembrane transporter activity	GO:0042626	6	2.1927e-09	1.76778	92	235	2671	12061	Eaffi04572-RA,Eaffi15139-RA,Eaff17998-RA,Eaff09690-RA,Eaffi00389-RA,Eaff16419-RA,Egulf21938-RA,Eaff12097-RA,Eaff16832-RA,Eaffi13587-RA,Egulf09059-RA,Eaffi03763-RA,Egulf18406-RA,Eaffi01694-RA,Eaffi21837-RA,Eaff11643-RA,Eaffi19291-RA,Eaffi05864-RA,Eaff19987-RA,Eaffi19287-RA,Egulf07745-RA,Eaffi18218-RA,Eaffi07240-RA,Eaff09367-RA,Egulf07721-RA,Egulf05340-RA,Eaffi18038-RA,Eaff02834-RA,Egulf18400-RA,Ea…
Molecular function	piRNA binding	GO:0034584	7	3.01221e-09	4.51554	13	13	2671	12061	Eaff12249-RA,Eaff12209-RA,Egulf18605-RA,Egulf04503-RA,Egulf04651-RA,Eaff09789-RA,Eaff12096-RA,Egulf04469-RA,Eaff12062-RA,Eaff12208-RA,Eaffi05893-RA,Eaffi03598-RA,Eaffi03425-RA,
Molecular function	ligand-gated monoatomic cation channel activity	GO:0099094	9	3.08284e-09	2.1047	55	118	2671	12061	Egulf13360-RA,Eaff16598-RA,Eaffi16810-RA,Eaff00486-RA,Eaff03120-RA,Eaff20005-RA,Egulf01295-RA,Egulf09416-RA,Eaff03814-RA,Egulf18192-RA,Egulf18099-RA,Egulf19242-RA,Egulf04530-RA,Egulf05093-RA,Eaff10566-RA,Eaffi15959-RA,Egulf18239-RA,Egulf17008-RA,Eaff09795-RA,Egulf04910-RA,Eaff18470-RA,Eaff09544-RA,Egulf19665-RA,Eaff10560-RA,Egulf10471-RA,Egulf01294-RA,Eaff09600-RA,Eaffi05420-RA,Egulf01081-RA,Eaff…
Molecular function	calmodulin binding	GO:0005516	4	3.71647e-09	1.91568	70	165	2671	12061	Eaff06489-RA,Eaffi04572-RA,Egulf13360-RA,Eaffi18953-RA,Egulf18372-RA,Eaff12097-RA,Eaff16598-RA,Eaffi02849-RA,Eaffi08671-RA,Eaffi03763-RA,Egulf13623-RA,Eaff20005-RA,Eaff11643-RA,Eaff15663-RA,Eaff09736-RA,Egulf14314-RA,Eaffi08650-RA,Egulf17103-RA,Eaffi08649-RA,Eaffi08670-RA,Egulf05340-RA,Egulf05093-RA,Egulf18370-RA,Eaffi15959-RA,Eaff02977-RA,Egulf13558-RA,Eaffi05822-RA,Eaff10921-RA,Eaff08446-RA,Eaf…
Molecular function	extracellularly glutamate-gated ion channel activity	GO:0005234	11	3.81961e-09	3.38665	21	28	2671	12061	Eaff10158-RA,Egulf10934-RA,Eaff03120-RA,Eaff04968-RA,Egulf02145-RA,Egulf01899-RA,Eaffi13417-RA,Egulf09416-RA,Eaff04548-RA,Eaff14433-RA,Eaffi06391-RA,Eaff04595-RA,Egulf01294-RA,Egulf01081-RA,Egulf11354-RA,Egulf10869-RA,Eaffi03621-RA,Egulf18832-RA,Egulf08016-RA,Egulf21404-RA,Eaff08743-RA,
Molecular function	glutamate binding	GO:0016595	7	4.10002e-09	2.76461	30	49	2671	12061	Egulf13360-RA,Eaff10158-RA,Egulf10934-RA,Eaff16598-RA,Eaff03120-RA,Eaff04968-RA,Egulf02145-RA,Egulf01899-RA,Eaffi14977-RA,Eaffi13417-RA,Egulf09416-RA,Eaff04548-RA,Eaff14433-RA,Egulf19785-RA,Eaffi15959-RA,Eaffi06391-RA,Eaff07715-RA,Eaff04595-RA,Egulf01294-RA,Eaffi14979-RA,Egulf11354-RA,Egulf10869-RA,Eaff16597-RA,Eaffi03621-RA,Egulf18832-RA,Eaffi14978-RA,Egulf08016-RA,Eaffi15958-RA,Egulf21404-RA,Eg…
Molecular function	adenylate cyclase binding	GO:0008179	5	4.28158e-09	3.47349	20	26	2671	12061	Egulf14305-RA,Egulf18192-RA,Egulf19242-RA,Eaff10566-RA,Egulf18239-RA,Eaff09795-RA,Eaff09544-RA,Eaff10560-RA,Eaff09600-RA,Eaffi05420-RA,Eaff13428-RA,Egulf01081-RA,Eaff15658-RA,Egulf18432-RA,Eaffi19495-RA,Eaff09545-RA,Egulf19250-RA,Eaff03849-RA,Egulf10169-RA,Eaff08743-RA,
Molecular function	proteoglycan binding	GO:0043394	4	6.44521e-09	2.45698	37	68	2671	12061	Egulf21938-RA,Eaff03977-RA,Egulf18406-RA,Egulf04927-RA,Eaffi05864-RA,Eaff19987-RA,Egulf07745-RA,Eaff06883-RA,Eaffi07240-RA,Eaffi14602-RA,Eaffi18038-RA,Egulf18400-RA,Egulf18979-RA,Eaff09762-RA,Eaff06884-RA,Eaff11986-RA,Eaffi04079-RA,Egulf04479-RA,Egulf20546-RA,Eaff12348-RA,Eaff05782-RA,Egulf04928-RA,Eaff11984-RA,Eaff01559-RA,Egulf20876-RA,Egulf09502-RA,Eaff03976-RA,Eaff09765-RA,Egulf10293-RA,Eaff0…
Molecular function	hormone binding	GO:0042562	3	6.61194e-09	2.08409	54	117	2671	12061	Eaff18894-RA,Egulf21938-RA,Egulf18406-RA,Eaffi21837-RA,Egulf19943-RA,Eaffi05864-RA,Eaff19987-RA,Egulf07745-RA,Eaffi07240-RA,Egulf18192-RA,Eaff16995-RA,Eaffi18038-RA,Egulf19242-RA,Egulf18400-RA,Egulf01239-RA,Eaff10566-RA,Eaff09762-RA,Egulf18239-RA,Eaff06642-RA,Egulf04479-RA,Eaff12348-RA,Eaff09795-RA,Eaff09544-RA,Egulf16146-RA,Eaff05782-RA,Eaff10560-RA,Eaff09600-RA,Eaffi05420-RA,Eaff01559-RA,Eaffi1…
Molecular function	cyclic nucleotide binding	GO:0030551	6	7.07892e-09	3.14719	23	33	2671	12061	Eaffi16810-RA,Eaff11504-RA,Eaffi08650-RA,Eaffi08649-RA,Eaff07985-RA,Eaff11503-RA,Eaff18470-RA,Eaffi04814-RA,Eaffi03193-RA,Egulf19665-RA,Eaff08474-RA,Egulf00774-RA,Egulf00777-RA,Egulf05514-RA,Eaffi03605-RA,Egulf14548-RA,Eaff12657-RA,Eaffi04815-RA,Eaff15790-RA,Egulf04103-RA,Eaff08475-RA,Egulf00273-RA,Egulf14477-RA,
Molecular function	glutamate receptor activity	GO:0008066	5	7.2347e-09	2.9351	26	40	2671	12061	Egulf13360-RA,Eaff16598-RA,Eaff00486-RA,Eaff03120-RA,Egulf01295-RA,Egulf09416-RA,Egulf04530-RA,Eaffi15959-RA,Egulf17008-RA,Egulf10471-RA,Egulf01294-RA,Egulf01081-RA,Eaff16050-RA,Eaff04144-RA,Eaff08927-RA,Eaff01920-RA,Eaff16597-RA,Eaff12302-RA,Egulf09415-RA,Eaffi03621-RA,Egulf06523-RA,Egulf08016-RA,Eaffi08153-RA,Eaffi15958-RA,Egulf14076-RA,Eaff08743-RA,
Molecular function	extracellularly glycine-gated chloride channel activity	GO:0016934	12	7.91624e-09	4.2145	14	15	2671	12061	Eaff10158-RA,Egulf10934-RA,Eaff04968-RA,Egulf02145-RA,Egulf01899-RA,Eaffi13417-RA,Eaff04548-RA,Eaff14433-RA,Eaffi06391-RA,Eaff04595-RA,Egulf11354-RA,Egulf10869-RA,Egulf18832-RA,Egulf21404-RA,
Molecular function	protein-arginine omega-N asymmetric methyltransferase activity	GO:0035242	9	7.91624e-09	4.2145	14	15	2671	12061	Eaffi16694-RA,Eaff17367-RA,Eaff15853-RA,Eaffi13655-RA,Eaff15344-RA,Egulf17307-RA,Eaff10511-RA,Eaffi23329-RA,Egulf17308-RA,Egulf19452-RA,Egulf11594-RA,Eaff05175-RA,Egulf14413-RA,Egulf12247-RA,
Molecular function	chondroitin sulfate binding	GO:0035374	5	7.91624e-09	4.2145	14	15	2671	12061	Egulf04927-RA,Egulf05810-RA,Eaff11236-RA,Egulf16277-RA,Eaff11986-RA,Eaffi04079-RA,Eaff19409-RA,Eaffi05099-RA,Egulf04928-RA,Eaff11984-RA,Egulf20876-RA,Eaff18958-RA,Eaff07178-RA,Eaff11985-RA,
Molecular function	voltage-gated potassium channel activity	GO:0005249	10	8.03419e-09	2.25777	44	88	2671	12061	Eaff06489-RA,Egulf09425-RA,Eaff16308-RA,Eaffi16810-RA,Eaff02324-RA,Egulf13623-RA,Eaff13349-RA,Eaff19403-RA,Egulf18099-RA,Egulf19307-RA,Eaffi18104-RA,Egulf14970-RA,Egulf13735-RA,Egulf08386-RA,Egulf04910-RA,Eaff18470-RA,Egulf03276-RA,Egulf19251-RA,Eaff03131-RA,Egulf19665-RA,Eaff08106-RA,Eaffi07003-RA,Eaff10609-RA,Egulf04523-RA,Egulf00400-RA,Egulf05129-RA,Eaffi04326-RA,Eaffi05670-RA,Eaffi09942-RA,Ea…
Molecular function	alkali metal ion binding	GO:0031420	6	8.07715e-09	2.80967	28	45	2671	12061	Egulf21938-RA,Eaff10561-RA,Egulf18406-RA,Eaffi21837-RA,Eaffi05864-RA,Eaff19987-RA,Egulf07745-RA,Eaffi07240-RA,Eaffi18038-RA,Egulf18400-RA,Eaffi06805-RA,Eaff09762-RA,Egulf04479-RA,Eaff12348-RA,Eaff05782-RA,Egulf19178-RA,Eaff01559-RA,Egulf09502-RA,Eaffi06909-RA,Eaff09765-RA,Eaff10492-RA,Egulf18404-RA,Egulf19507-RA,Eaffi06809-RA,Egulf19246-RA,Eaffi23876-RA,Egulf19177-RA,Eaffi01721-RA,
Molecular function	histone methyltransferase activity	GO:0042054	7	8.43714e-09	2.37981	39	74	2671	12061	Eaffi16694-RA,Egulf15807-RA,Egulf05137-RA,Eaff17367-RA,Egulf01469-RA,Eaffi18129-RA,Egulf01470-RA,Eaff02506-RA,Eaffi13385-RA,Eaff15853-RA,Egulf09394-RA,Eaffi13655-RA,Eaff15344-RA,Eaff08341-RA,Eaff16174-RA,Egulf17307-RA,Eaff09093-RA,Eaffi07912-RA,Eaffi00359-RA,Eaff10511-RA,Eaffi18131-RA,Eaffi23329-RA,Egulf17308-RA,Egulf13913-RA,Eaffi10856-RA,Egulf20305-RA,Egulf00635-RA,Egulf19452-RA,Eaff04116-RA,Ea…
Molecular function	excitatory extracellular ligand-gated monoatomic ion channel activity	GO:0005231	10	1.24235e-08	2.3832	38	72	2671	12061	Eaff10158-RA,Egulf07470-RA,Egulf10934-RA,Eaff03120-RA,Eaff04968-RA,Egulf02145-RA,Egulf01899-RA,Eaffi13417-RA,Egulf09416-RA,Eaff03814-RA,Egulf18192-RA,Egulf19242-RA,Eaff04548-RA,Eaff14433-RA,Eaff10566-RA,Eaffi06391-RA,Egulf18239-RA,Eaff09795-RA,Eaff09544-RA,Eaff04595-RA,Eaff10560-RA,Egulf20678-RA,Egulf01294-RA,Eaff09600-RA,Eaffi05420-RA,Egulf01081-RA,Egulf11354-RA,Egulf10869-RA,Eaff07012-RA,Eaffi0…
Molecular function	primary active transmembrane transporter activity	GO:0015399	5	1.28534e-08	1.61269	115	322	2671	12061	Eaffi04572-RA,Eaffi15139-RA,Eaff17998-RA,Eaff09690-RA,Eaffi00389-RA,Eaff16419-RA,Eaff03123-RA,Egulf21938-RA,Eaff04805-RA,Eaff12097-RA,Eaff16832-RA,Eaffi13587-RA,Egulf09059-RA,Egulf15931-RA,Eaffi03763-RA,Egulf18406-RA,Eaffi01694-RA,Eaffi21837-RA,Eaff11643-RA,Eaffi19291-RA,Eaffi05864-RA,Eaff18674-RA,Eaff19987-RA,Eaffi19287-RA,Egulf07745-RA,Egulf03578-RA,Eaffi18218-RA,Eaffi07240-RA,Eaff02222-RA,Eaff…
Molecular function	fatty acid transmembrane transporter activity	GO:0015245	7	1.36495e-08	4.51554	12	12	2671	12061	Eaffi19542-RA,Eaff13187-RA,Eaffi02589-RA,Eaff12985-RA,Egulf03636-RA,Egulf19658-RA,Eaffi07422-RA,Egulf16688-RA,Eaff13053-RA,Egulf03498-RA,Eaff19267-RA,Egulf03711-RA,
Molecular function	GABA receptor activity	GO:0016917	5	1.50113e-08	3.43181	19	25	2671	12061	Egulf07470-RA,Eaff13502-RA,Eaff16787-RA,Eaff01648-RA,Eaffi01328-RA,Egulf10849-RA,Egulf02856-RA,Egulf11685-RA,Eaff01292-RA,Eaff08114-RA,Eaff05258-RA,Egulf00403-RA,Egulf20678-RA,Eaff08115-RA,Egulf13030-RA,Eaffi16722-RA,Eaff07012-RA,Egulf07844-RA,Eaffi13744-RA,
Molecular function	GABA-A receptor activity	GO:0004890	6	1.55991e-08	3.80256	16	19	2671	12061	Egulf07470-RA,Eaff13502-RA,Eaff16787-RA,Eaff01648-RA,Eaffi01328-RA,Egulf10849-RA,Egulf02856-RA,Egulf11685-RA,Eaff01292-RA,Eaff05258-RA,Egulf20678-RA,Egulf13030-RA,Eaffi16722-RA,Eaff07012-RA,Egulf07844-RA,Eaffi13744-RA,
Molecular function	GABA-gated chloride ion channel activity	GO:0022851	11	1.55991e-08	3.80256	16	19	2671	12061	Egulf07470-RA,Eaff13502-RA,Eaff16787-RA,Eaff01648-RA,Eaffi01328-RA,Egulf10849-RA,Egulf02856-RA,Egulf11685-RA,Eaff01292-RA,Eaff05258-RA,Egulf20678-RA,Egulf13030-RA,Eaffi16722-RA,Eaff07012-RA,Egulf07844-RA,Eaffi13744-RA,
Molecular function	ligand-gated calcium channel activity	GO:0099604	10	1.56095e-08	2.86351	26	41	2671	12061	Egulf13360-RA,Eaff16598-RA,Eaff03120-RA,Eaff20005-RA,Egulf01295-RA,Egulf09416-RA,Eaff03814-RA,Egulf04530-RA,Egulf05093-RA,Eaffi15959-RA,Egulf17008-RA,Egulf10471-RA,Egulf01294-RA,Eaff04144-RA,Eaff08927-RA,Eaff11833-RA,Eaffi04288-RA,Eaff01920-RA,Eaff16597-RA,Eaff12302-RA,Egulf09415-RA,Eaffi03621-RA,Eaffi04286-RA,Egulf08016-RA,Eaffi08153-RA,Eaffi15958-RA,
Molecular function	chloride channel activity	GO:0005254	8	1.92643e-08	2.2076	44	90	2671	12061	Eaff07460-RA,Eaff10158-RA,Egulf07470-RA,Eaff13502-RA,Egulf10934-RA,Eaff16787-RA,Eaff01648-RA,Eaffi01328-RA,Eaff04968-RA,Egulf02145-RA,Egulf01899-RA,Eaffi13417-RA,Egulf10849-RA,Eaff04548-RA,Egulf02856-RA,Eaff14433-RA,Eaffi06391-RA,Egulf11685-RA,Eaff01292-RA,Egulf01248-RA,Eaff04595-RA,Eaff05258-RA,Egulf20678-RA,Egulf12865-RA,Egulf13491-RA,Eaff09513-RA,Egulf13030-RA,Egulf11354-RA,Eaff09222-RA,Eaffi1…
Molecular function	calcium ion binding	GO:0005509	6	1.93898e-08	1.60964	113	317	2671	12061	Eaffi09126-RA,Egulf13360-RA,Eaff16534-RA,Eaff17680-RA,Eaff04805-RA,Eaffi21005-RA,Eaff16598-RA,Eaffi10278-RA,Eaff03977-RA,Egulf01012-RA,Eaff01862-RA,Eaffi02849-RA,Eaff10561-RA,Eaff20005-RA,Eaff08079-RA,Egulf14626-RA,Egulf06838-RA,Egulf13427-RA,Egulf11046-RA,Eaff02222-RA,Eaff06660-RA,Egulf22158-RA,Eaff16646-RA,Eaff12317-RA,Egulf13362-RA,Egulf19094-RA,Eaff00927-RA,Egulf05016-RA,Egulf05093-RA,Eaffi06…
Molecular function	intramolecular oxidoreductase activity	GO:0016860	4	2.72376e-08	2.23121	42	85	2671	12061	Egulf21133-RA,Egulf01388-RA,Eaffi21005-RA,Eaffi14067-RA,Egulf16380-RA,Eaff01862-RA,Eaffi11588-RA,Eaff04750-RA,Eaff03298-RA,Eaff06660-RA,Eaff13253-RA,Egulf11112-RA,Eaffi04095-RA,Egulf01854-RA,Eaffi14298-RA,Eaff06661-RA,Egulf14385-RA,Egulf03414-RA,Egulf20960-RA,Eaff14096-RA,Egulf08078-RA,Egulf09851-RA,Egulf00337-RA,Eaff14652-RA,Eaffi18282-RA,Eaff08044-RA,Eaff15894-RA,Eaffi18404-RA,Eaff06488-RA,Eaff…
Molecular function	growth factor binding	GO:0019838	4	3.30485e-08	2.31879	38	74	2671	12061	Egulf20802-RA,Egulf16154-RA,Eaff11639-RA,Eaffi04076-RA,Eaffi15933-RA,Eaff18857-RA,Eaff06883-RA,Eaffi14602-RA,Eaffi20926-RA,Egulf18979-RA,Egulf04030-RA,Egulf08691-RA,Eaff06884-RA,Eaff01192-RA,Egulf11950-RA,Egulf06374-RA,Eaff06642-RA,Egulf20546-RA,Eaff16575-RA,Egulf16146-RA,Eaff02009-RA,Egulf05346-RA,Eaffi03115-RA,Eaffi04579-RA,Eaffi14283-RA,Egulf20978-RA,Eaff06644-RA,Egulf20876-RA,Egulf20016-RA,Ea…
Molecular function	ion channel regulator activity	GO:0099106	4	3.52217e-08	1.96478	57	131	2671	12061	Eaffi21345-RA,Eaff09398-RA,Eaff03683-RA,Eaffi01410-RA,Egulf00537-RA,Eaff16655-RA,Eaffi13559-RA,Egulf10123-RA,Egulf02286-RA,Eaff12671-RA,Egulf18192-RA,Egulf19242-RA,Egulf04717-RA,Eaff10566-RA,Egulf18239-RA,Eaff11178-RA,Eaff20185-RA,Egulf17769-RA,Eaff09795-RA,Eaff09544-RA,Eaff08233-RA,Eaffi03176-RA,Eaff10560-RA,Eaff12155-RA,Eaff15736-RA,Eaff05094-RA,Egulf09610-RA,Eaff09600-RA,Egulf04135-RA,Eaffi054…
Molecular function	extracellularly glutamate-gated chloride channel activity	GO:0008068	12	5.03076e-08	3.9511	14	16	2671	12061	Eaff10158-RA,Egulf10934-RA,Eaff04968-RA,Egulf02145-RA,Egulf01899-RA,Eaffi13417-RA,Eaff04548-RA,Eaff14433-RA,Eaffi06391-RA,Eaff04595-RA,Egulf11354-RA,Egulf10869-RA,Egulf18832-RA,Egulf21404-RA,
Molecular function	prostaglandin-D synthase activity	GO:0004667	5	6.18333e-08	4.51554	11	11	2671	12061	Eaffi21005-RA,Eaff01862-RA,Eaff06660-RA,Eaffi14298-RA,Eaff06661-RA,Egulf20960-RA,Egulf08078-RA,Eaffi21006-RA,Egulf09639-RA,Eaff01863-RA,Egulf08077-RA,
Molecular function	NADH binding	GO:0070404	9	6.18333e-08	4.51554	11	11	2671	12061	Eaff04278-RA,Eaff04696-RA,Eaff09647-RA,Eaffi04844-RA,Eaffi02937-RA,Egulf10578-RA,Eaff12524-RA,Egulf03884-RA,Eaffi03377-RA,Egulf04258-RA,Eaff19641-RA,
Molecular function	transforming growth factor beta receptor activity, type I	GO:0005025	10	6.18333e-08	4.51554	11	11	2671	12061	Egulf20802-RA,Egulf16154-RA,Eaff18857-RA,Eaffi20926-RA,Egulf08691-RA,Egulf06374-RA,Eaff02009-RA,Egulf20016-RA,Eaff07515-RA,Eaff07111-RA,Eaff00345-RA,
Molecular function	vitamin D 24-hydroxylase activity	GO:0070576	5	6.18333e-08	4.51554	11	11	2671	12061	Eaff02583-RA,Eaff03795-RA,Eaffi22535-RA,Eaffi21130-RA,Egulf10113-RA,Eaffi20239-RA,Egulf17791-RA,Eaffi09879-RA,Eaffi16074-RA,Eaffi17219-RA,Eaff17445-RA,
Molecular function	vitamin D 25-hydroxylase activity	GO:0070643	5	6.18333e-08	4.51554	11	11	2671	12061	Eaff02583-RA,Eaff03795-RA,Eaffi22535-RA,Eaffi21130-RA,Egulf10113-RA,Eaffi20239-RA,Eaffi09879-RA,Eaffi16074-RA,Eaffi17219-RA,Eaff17445-RA,Eaffi11346-RA,
Molecular function	obsolete eye pigment precursor transporter activity	GO:0005395	0	6.18333e-08	4.51554	11	11	2671	12061	Eaffi15139-RA,Eaff16832-RA,Egulf09059-RA,Eaff02834-RA,Eaff02837-RA,Eaff09004-RA,Egulf09064-RA,Egulf08159-RA,Egulf12940-RA,Egulf14331-RA,Eaff15683-RA,
Molecular function	vitamin D3 25-hydroxylase activity	GO:0030343	6	6.18333e-08	4.51554	11	11	2671	12061	Eaff02583-RA,Eaff03795-RA,Eaffi22535-RA,Eaffi21130-RA,Egulf10113-RA,Eaffi20239-RA,Eaffi09879-RA,Eaffi16074-RA,Eaffi17219-RA,Eaff17445-RA,Eaffi11346-RA,
Molecular function	anion binding	GO:0043168	4	8.14065e-08	1.22667	461	1697	2671	12061	Eaff06489-RA,Egulf20802-RA,Eaff12123-RA,Eaffi05771-RA,Eaff01580-RA,Eaff07460-RA,Egulf06159-RA,Eaffi08922-RA,Egulf13360-RA,Eaffi23551-RA,Eaff10158-RA,Eaffi18953-RA,Eaff07804-RA,Eaff14623-RA,Egulf01364-RA,Eaff10707-RA,Egulf16866-RA,Eaff17998-RA,Egulf05101-RA,Eaff09690-RA,Eaffi16723-RA,Egulf18921-RA,Eaff16419-RA,Egulf22140-RA,Egulf21488-RA,Eaff09911-RA,Eaffi16338-RA,Eaffi13736-RA,Eaff07714-RA,Eaffi1…
Molecular function	ATPase-coupled monoatomic cation transmembrane transporter activity	GO:0019829	7	8.39035e-08	1.9899	52	118	2671	12061	Eaffi04572-RA,Eaff17998-RA,Egulf21938-RA,Eaff12097-RA,Eaffi13587-RA,Eaffi03763-RA,Egulf18406-RA,Eaffi21837-RA,Eaff11643-RA,Eaffi05864-RA,Eaff19987-RA,Egulf07745-RA,Eaffi07240-RA,Egulf05340-RA,Eaffi18038-RA,Egulf18400-RA,Eaff09762-RA,Eaff12436-RA,Egulf11522-RA,Egulf04479-RA,Eaff09487-RA,Eaff12348-RA,Eaffi01858-RA,Eaffi03497-RA,Eaffi03762-RA,Eaff05782-RA,Egulf04379-RA,Eaff18149-RA,Eaff16080-RA,Eaff…
Molecular function	organic acid:sodium symporter activity	GO:0005343	9	8.72011e-08	2.88493	23	36	2671	12061	Egulf06466-RA,Egulf02095-RA,Egulf20268-RA,Eaff00425-RA,Egulf16610-RA,Eaff10850-RA,Eaffi02118-RA,Eaffi01162-RA,Eaff01053-RA,Eaff19211-RA,Egulf21912-RA,Eaff14243-RA,Egulf07189-RA,Egulf07190-RA,Eaff07294-RA,Egulf20267-RA,Eaff00740-RA,Eaffi00430-RA,Eaff18036-RA,Egulf21655-RA,Eaff06001-RA,Egulf15113-RA,Egulf19575-RA,
Molecular function	RNA polymerase II general transcription initiation factor activity	GO:0016251	3	9.16461e-08	2.75338	25	41	2671	12061	Egulf01045-RA,Eaff08717-RA,Eaff16196-RA,Egulf01052-RA,Eaff01612-RA,Egulf13893-RA,Eaff10790-RA,Egulf01049-RA,Egulf07800-RA,Eaff08711-RA,Eaffi01790-RA,Eaff08716-RA,Egulf01041-RA,Egulf07801-RA,Eaff05712-RA,Eaff08713-RA,Eaffi08374-RA,Egulf01047-RA,Eaffi08383-RA,Egulf01051-RA,Eaff08715-RA,Eaffi08376-RA,Eaff05714-RA,Eaff08718-RA,Eaffi08380-RA,
Molecular function	neurotransmitter binding	GO:0042165	3	9.74273e-08	2.13372	43	91	2671	12061	Egulf13360-RA,Eaff10158-RA,Egulf10934-RA,Eaff16598-RA,Egulf19943-RA,Eaff04968-RA,Egulf02145-RA,Egulf01899-RA,Eaff02181-RA,Eaffi13417-RA,Egulf18192-RA,Egulf19242-RA,Eaff04548-RA,Eaff14433-RA,Egulf08518-RA,Eaff10566-RA,Eaffi15959-RA,Eaffi06391-RA,Egulf18239-RA,Eaff09795-RA,Eaff02605-RA,Eaff09544-RA,Eaff04595-RA,Eaff10560-RA,Egulf08807-RA,Eaff09600-RA,Eaffi05420-RA,Egulf11354-RA,Egulf10869-RA,Eaff16…
Molecular function	P-type transmembrane transporter activity	GO:0140358	7	1.34543e-07	2.02566	48	107	2671	12061	Eaffi04572-RA,Eaff17998-RA,Egulf21938-RA,Eaff12097-RA,Eaffi13587-RA,Eaffi03763-RA,Egulf18406-RA,Eaffi21837-RA,Eaff11643-RA,Eaffi05864-RA,Eaff19987-RA,Egulf07745-RA,Eaffi07240-RA,Egulf05340-RA,Eaffi18038-RA,Egulf18400-RA,Eaff09762-RA,Egulf11522-RA,Egulf04479-RA,Eaff09487-RA,Eaff12348-RA,Eaffi01858-RA,Eaffi03762-RA,Eaff05782-RA,Eaff18149-RA,Eaff16080-RA,Eaff01559-RA,Egulf18367-RA,Eaff09732-RA,Eaff0…
Molecular function	P-type ion transporter activity	GO:0015662	8	1.34543e-07	2.02566	48	107	2671	12061	Eaffi04572-RA,Eaff17998-RA,Egulf21938-RA,Eaff12097-RA,Eaffi13587-RA,Eaffi03763-RA,Egulf18406-RA,Eaffi21837-RA,Eaff11643-RA,Eaffi05864-RA,Eaff19987-RA,Egulf07745-RA,Eaffi07240-RA,Egulf05340-RA,Eaffi18038-RA,Egulf18400-RA,Eaff09762-RA,Egulf11522-RA,Egulf04479-RA,Eaff09487-RA,Eaff12348-RA,Eaffi01858-RA,Eaffi03762-RA,Eaff05782-RA,Eaff18149-RA,Eaff16080-RA,Eaff01559-RA,Egulf18367-RA,Eaff09732-RA,Eaff0…
Molecular function	intronic transcription regulatory region sequence-specific DNA binding	GO:0001161	9	1.62804e-07	2.96332	21	32	2671	12061	Egulf01708-RA,Eaff00651-RA,Eaffi21782-RA,Eaffi11384-RA,Egulf22016-RA,Eaffi07605-RA,Egulf22015-RA,Eaffi21784-RA,Eaff05706-RA,Eaffi21783-RA,Eaff05705-RA,Eaff13460-RA,Eaff05700-RA,Egulf22012-RA,Eaffi21408-RA,Eaff09320-RA,Eaff05707-RA,Egulf22019-RA,Egulf02897-RA,Egulf06715-RA,Eaff05711-RA,
Molecular function	chloride channel regulator activity	GO:0017081	5	2.06087e-07	3.44041	16	21	2671	12061	Egulf18192-RA,Egulf19242-RA,Egulf04717-RA,Eaff10566-RA,Egulf18239-RA,Eaff09795-RA,Eaff09544-RA,Eaff10560-RA,Eaff12155-RA,Eaff09600-RA,Eaffi05420-RA,Eaffi03845-RA,Egulf18432-RA,Eaffi19495-RA,Eaff09545-RA,Egulf19250-RA,
Molecular function	ABC-type guanine transporter activity	GO:0008558	8	2.80028e-07	4.51554	10	10	2671	12061	Eaffi15139-RA,Eaff16832-RA,Egulf09059-RA,Eaff02834-RA,Eaff02837-RA,Eaff09004-RA,Egulf09064-RA,Egulf12940-RA,Egulf14331-RA,Eaff15683-RA,
Molecular function	oxidoreductase activity, acting on CH or CH2 groups, quinone or similar compound as acceptor	GO:0033695	5	2.80028e-07	4.51554	10	10	2671	12061	Eaff02583-RA,Eaff03795-RA,Eaffi22535-RA,Eaffi21130-RA,Egulf10113-RA,Eaffi20239-RA,Eaffi09879-RA,Eaffi16074-RA,Eaffi17219-RA,Eaff17445-RA,
Molecular function	ABC-type 3',5'-cyclic GMP transmembrane transporter activity	GO:1905948	8	2.80028e-07	4.51554	10	10	2671	12061	Eaffi15139-RA,Eaff16832-RA,Egulf09059-RA,Eaff02834-RA,Eaff02837-RA,Eaff09004-RA,Egulf09064-RA,Egulf12940-RA,Egulf14331-RA,Eaff15683-RA,
Molecular function	guanine nucleotide transmembrane transporter activity	GO:0001409	7	2.80028e-07	4.51554	10	10	2671	12061	Eaffi15139-RA,Eaff16832-RA,Egulf09059-RA,Eaff02834-RA,Eaff02837-RA,Eaff09004-RA,Egulf09064-RA,Egulf12940-RA,Egulf14331-RA,Eaff15683-RA,
Molecular function	testosterone 6-beta-hydroxylase activity	GO:0050649	6	2.80028e-07	4.51554	10	10	2671	12061	Eaff02583-RA,Eaff03795-RA,Eaffi22535-RA,Eaffi21130-RA,Egulf10113-RA,Eaffi20239-RA,Eaffi09879-RA,Eaffi16074-RA,Eaffi17219-RA,Eaff17445-RA,
Molecular function	caffeine oxidase activity	GO:0034875	6	2.80028e-07	4.51554	10	10	2671	12061	Eaff02583-RA,Eaff03795-RA,Eaffi22535-RA,Eaffi21130-RA,Egulf10113-RA,Eaffi20239-RA,Eaffi09879-RA,Eaffi16074-RA,Eaffi17219-RA,Eaff17445-RA,
Molecular function	estrogen 16-alpha-hydroxylase activity	GO:0101020	6	2.80028e-07	4.51554	10	10	2671	12061	Eaff02583-RA,Eaff03795-RA,Eaffi22535-RA,Eaffi21130-RA,Egulf10113-RA,Eaffi20239-RA,Eaffi09879-RA,Eaffi16074-RA,Eaffi17219-RA,Eaff17445-RA,
Molecular function	guanine transmembrane transporter activity	GO:0015208	6	2.80028e-07	4.51554	10	10	2671	12061	Eaffi15139-RA,Eaff16832-RA,Egulf09059-RA,Eaff02834-RA,Eaff02837-RA,Eaff09004-RA,Egulf09064-RA,Egulf12940-RA,Egulf14331-RA,Eaff15683-RA,
Molecular function	channel regulator activity	GO:0016247	3	3.06014e-07	1.86511	57	138	2671	12061	Eaffi21345-RA,Eaff09398-RA,Eaff03683-RA,Eaffi01410-RA,Egulf00537-RA,Eaff16655-RA,Eaffi13559-RA,Egulf10123-RA,Egulf02286-RA,Eaff12671-RA,Egulf18192-RA,Egulf19242-RA,Egulf04717-RA,Eaff10566-RA,Egulf18239-RA,Eaff11178-RA,Eaff20185-RA,Egulf17769-RA,Eaff09795-RA,Eaff09544-RA,Eaff08233-RA,Eaffi03176-RA,Eaff10560-RA,Eaff12155-RA,Eaff15736-RA,Eaff05094-RA,Egulf09610-RA,Eaff09600-RA,Egulf04135-RA,Eaffi054…
Molecular function	general transcription initiation factor activity	GO:0140223	2	3.37529e-07	2.62531	25	43	2671	12061	Egulf01045-RA,Eaff08717-RA,Eaff16196-RA,Egulf01052-RA,Eaff01612-RA,Egulf13893-RA,Eaff10790-RA,Egulf01049-RA,Egulf07800-RA,Eaff08711-RA,Eaffi01790-RA,Eaff08716-RA,Egulf01041-RA,Egulf07801-RA,Eaff05712-RA,Eaff08713-RA,Eaffi08374-RA,Egulf01047-RA,Eaffi08383-RA,Egulf01051-RA,Eaff08715-RA,Eaffi08376-RA,Eaff05714-RA,Eaff08718-RA,Eaffi08380-RA,
Molecular function	obsolete drug binding	GO:0008144	0	3.77347e-07	1.31296	255	877	2671	12061	Egulf20802-RA,Eaff12123-RA,Eaffi16694-RA,Egulf13360-RA,Eaff10158-RA,Eaff07804-RA,Eaff14623-RA,Egulf16866-RA,Eaff17998-RA,Eaff16419-RA,Egulf21488-RA,Eaff07714-RA,Egulf21938-RA,Egulf07470-RA,Egulf06042-RA,Eaff12745-RA,Egulf10934-RA,Eaff16598-RA,Egulf11514-RA,Eaff17367-RA,Egulf19787-RA,Eaffi11711-RA,Egulf20135-RA,Egulf21587-RA,Eaffi15323-RA,Eaffi13587-RA,Eaff01648-RA,Eaffi01328-RA,Eaff03120-RA,Egulf…
Molecular function	structural molecule activity	GO:0005198	2	4.15959e-07	1.33114	232	787	2671	12061	Egulf18131-RA,Eaffi06041-RA,Eaff17998-RA,Egulf15820-RA,Eaffi19578-RA,Eaffi19653-RA,Eaffi12832-RA,Eaff13293-RA,Egulf15782-RA,Eaff19966-RA,Egulf07727-RA,Eaffi21676-RA,Egulf14468-RA,Eaffi12946-RA,Eaffi17664-RA,Eaffi15418-RA,Eaff17680-RA,Eaffi23452-RA,Eaff05626-RA,Eaff02890-RA,Eaffi05569-RA,Eaff09656-RA,Eaffi23121-RA,Eaff05180-RA,Eaff11035-RA,Egulf05014-RA,Egulf13954-RA,Eaff09157-RA,Eaff06378-RA,Egul…
Molecular function	ATPase-coupled ion transmembrane transporter activity	GO:0042625	7	4.20231e-07	1.90901	52	123	2671	12061	Eaffi04572-RA,Eaff17998-RA,Egulf21938-RA,Eaff12097-RA,Eaffi13587-RA,Eaffi03763-RA,Egulf18406-RA,Eaffi21837-RA,Eaff11643-RA,Eaffi05864-RA,Eaff19987-RA,Egulf07745-RA,Eaffi07240-RA,Egulf05340-RA,Eaffi18038-RA,Egulf18400-RA,Eaff09762-RA,Eaff12436-RA,Egulf11522-RA,Egulf04479-RA,Eaff09487-RA,Eaff12348-RA,Eaffi01858-RA,Eaffi03497-RA,Eaffi03762-RA,Eaff05782-RA,Egulf04379-RA,Eaff18149-RA,Eaff16080-RA,Eaff…
Molecular function	ion binding	GO:0043167	3	4.29808e-07	1.16257	673	2614	2671	12061	Eaff06489-RA,Egulf20802-RA,Eaff12123-RA,Eaffi05771-RA,Eaff01580-RA,Eaff07460-RA,Egulf06159-RA,Eaffi16694-RA,Eaffi09126-RA,Eaffi08922-RA,Egulf13360-RA,Eaffi23551-RA,Eaff10158-RA,Eaffi18953-RA,Eaff07804-RA,Eaff14623-RA,Egulf01364-RA,Eaff10707-RA,Egulf16866-RA,Eaff18346-RA,Eaff16534-RA,Eaff17998-RA,Egulf05101-RA,Eaff09690-RA,Eaffi16723-RA,Egulf18921-RA,Eaff16419-RA,Egulf22140-RA,Egulf21488-RA,Eaff09…
Molecular function	intramembrane lipid transporter activity	GO:0140303	4	5.18264e-07	2.75949	22	36	2671	12061	Eaff09690-RA,Eaff16419-RA,Eaffi01694-RA,Eaff09367-RA,Egulf07721-RA,Eaff12436-RA,Eaff12110-RA,Egulf01764-RA,Eaff01792-RA,Egulf18312-RA,Eaffi00359-RA,Eaffi03497-RA,Egulf01765-RA,Egulf04379-RA,Egulf08159-RA,Egulf04769-RA,Eaff01542-RA,Eaffi07544-RA,Eaffi05757-RA,Egulf04378-RA,Eaffi07546-RA,Eaff18076-RA,
Molecular function	active monoatomic ion transmembrane transporter activity	GO:0022853	5	5.32604e-07	1.52315	113	335	2671	12061	Eaffi04572-RA,Eaff17478-RA,Eaff17998-RA,Eaff04677-RA,Eaff03123-RA,Egulf21938-RA,Eaff12097-RA,Egulf06466-RA,Egulf00886-RA,Eaff10561-RA,Eaffi13587-RA,Eaffi03763-RA,Egulf02095-RA,Egulf18406-RA,Eaffi21837-RA,Eaff11643-RA,Egulf20268-RA,Eaffi05864-RA,Eaff00425-RA,Egulf16610-RA,Eaff19987-RA,Egulf07745-RA,Egulf03578-RA,Eaff10850-RA,Eaffi02118-RA,Eaffi07240-RA,Egulf11029-RA,Eaff13115-RA,Egulf05340-RA,Eaff…
Molecular function	small molecule binding	GO:0036094	3	5.57476e-07	1.22711	406	1494	2671	12061	Egulf20802-RA,Eaff12123-RA,Eaffi05771-RA,Eaff07460-RA,Egulf06159-RA,Egulf13360-RA,Eaffi23551-RA,Eaff10158-RA,Eaffi18953-RA,Eaff07804-RA,Eaff14623-RA,Egulf01364-RA,Eaff14226-RA,Egulf16866-RA,Eaff17998-RA,Egulf05101-RA,Eaffi16723-RA,Egulf18921-RA,Eaff16419-RA,Egulf22140-RA,Egulf21488-RA,Eaffi16338-RA,Eaffi13736-RA,Eaff07714-RA,Eaffi12423-RA,Egulf21938-RA,Eaff04805-RA,Egulf13564-RA,Egulf06042-RA,Egu…
Molecular function	protein-arginine omega-N monomethyltransferase activity	GO:0035241	9	5.91855e-07	4.13924	11	12	2671	12061	Eaffi16694-RA,Eaff17367-RA,Eaff02506-RA,Eaff15853-RA,Eaff15344-RA,Egulf17307-RA,Eaffi23329-RA,Egulf17308-RA,Egulf14413-RA,Egulf07925-RA,Egulf12247-RA,
Molecular function	retinoic acid-responsive element binding	GO:0044323	11	5.91855e-07	4.13924	11	12	2671	12061	Egulf19357-RA,Eaff10663-RA,Egulf01189-RA,Egulf01186-RA,Eaff10660-RA,Egulf19356-RA,Eaff08831-RA,Eaffi07073-RA,Egulf19358-RA,Eaffi08253-RA,Eaff10661-RA,
Molecular function	cytokine binding	GO:0019955	4	7.48972e-07	2.49796	26	47	2671	12061	Egulf20802-RA,Eaff08581-RA,Egulf16154-RA,Eaff11639-RA,Eaff18857-RA,Eaffi20926-RA,Egulf04030-RA,Egulf08691-RA,Eaffi08546-RA,Eaff01192-RA,Egulf11950-RA,Egulf06374-RA,Eaff02009-RA,Egulf05346-RA,Eaffi03115-RA,Eaffi04579-RA,Egulf20876-RA,Egulf20016-RA,Eaffi00330-RA,Eaff07515-RA,Eaff12726-RA,Eaff07111-RA,Eaff00345-RA,Egulf00905-RA,Eaff07178-RA,Eaff17575-RA,
Molecular function	chitin deacetylase activity	GO:0004099	6	8.10219e-07	3.51208	14	18	2671	12061	Eaff15702-RA,Eaffi18448-RA,Eaff16547-RA,Egulf14348-RA,Eaffi18449-RA,Eaff02058-RA,Egulf14260-RA,Eaff15698-RA,Egulf14349-RA,Eaff15607-RA,Egulf14347-RA,Eaff15701-RA,Egulf13405-RA,Egulf08649-RA,
Molecular function	protein heterodimerization activity	GO:0046982	5	1.07739e-06	1.35822	191	635	2671	12061	Eaff06489-RA,Egulf20802-RA,Egulf01045-RA,Eaff01580-RA,Eaff01338-RA,Eaffi16694-RA,Egulf13360-RA,Egulf09425-RA,Eaff14623-RA,Egulf13179-RA,Eaff17998-RA,Egulf18372-RA,Eaff19173-RA,Eaffi23452-RA,Eaff11639-RA,Eaff16598-RA,Eaff17367-RA,Egulf19357-RA,Eaff02324-RA,Eaffi01840-RA,Egulf16380-RA,Egulf01012-RA,Eaffi17950-RA,Egulf13623-RA,Egulf05615-RA,Eaff08717-RA,Eaff10663-RA,Egulf12268-RA,Eaff13349-RA,Eaff02…
Molecular function	cation binding	GO:0043169	4	1.19726e-06	1.23032	376	1380	2671	12061	Egulf20802-RA,Eaff12123-RA,Eaffi16694-RA,Eaffi09126-RA,Egulf13360-RA,Eaff10158-RA,Egulf16866-RA,Eaff18346-RA,Eaff16534-RA,Eaff17998-RA,Eaffi16723-RA,Eaffi16338-RA,Eaff07714-RA,Egulf21235-RA,Egulf15807-RA,Eaff19173-RA,Eaff17680-RA,Egulf21938-RA,Eaff04805-RA,Eaff12209-RA,Egulf13564-RA,Egulf10934-RA,Eaffi21005-RA,Eaff18318-RA,Eaff16598-RA,Eaff17367-RA,Eaffi10278-RA,Egulf19787-RA,Eaffi11711-RA,Eaff03…
Molecular function	pyridoxal oxidase activity	GO:0004732	6	1.2678e-06	4.51554	9	9	2671	12061	Egulf16073-RA,Egulf16439-RA,Eaffi16531-RA,Eaff16871-RA,Egulf04950-RA,Eaffi20001-RA,Eaffi04109-RA,Eaff18826-RA,Eaff19084-RA,
Molecular function	trehalose-phosphatase activity	GO:0004805	8	1.2678e-06	4.51554	9	9	2671	12061	Eaffi03097-RA,Egulf04534-RA,Eaffi03632-RA,Eaff12746-RA,Egulf04847-RA,Eaff12046-RA,Eaff12297-RA,Egulf04009-RA,Eaffi04011-RA,
Molecular function	alanine-oxo-acid transaminase activity	GO:0047635	6	1.2678e-06	4.51554	9	9	2671	12061	Egulf06042-RA,Egulf06038-RA,Egulf17221-RA,Eaff00094-RA,Egulf06037-RA,Egulf08020-RA,Eaff01918-RA,Egulf17222-RA,Egulf06041-RA,
Molecular function	L-alanine:2-oxoglutarate aminotransferase activity	GO:0004021	7	1.2678e-06	4.51554	9	9	2671	12061	Egulf06042-RA,Egulf06038-RA,Egulf17221-RA,Eaff00094-RA,Egulf06037-RA,Egulf08020-RA,Eaff01918-RA,Egulf17222-RA,Egulf06041-RA,
Molecular function	chloride transmembrane transporter activity	GO:0015108	6	1.57725e-06	1.86592	50	121	2671	12061	Eaff07460-RA,Eaff10158-RA,Egulf07470-RA,Eaff13502-RA,Egulf10934-RA,Eaff16787-RA,Eaff01648-RA,Eaffi01328-RA,Eaff04968-RA,Egulf02145-RA,Egulf16610-RA,Egulf01899-RA,Eaffi13417-RA,Eaff10850-RA,Egulf10849-RA,Eaff04548-RA,Egulf02856-RA,Eaff14433-RA,Eaffi06391-RA,Egulf11685-RA,Eaff01292-RA,Egulf01248-RA,Eaff04595-RA,Eaff05258-RA,Egulf20678-RA,Egulf12865-RA,Egulf13491-RA,Eaffi17242-RA,Eaff09513-RA,Egulf1…
Molecular function	outward rectifier potassium channel activity	GO:0015271	11	1.98983e-06	3.22538	15	21	2671	12061	Egulf09425-RA,Eaff02324-RA,Eaff13349-RA,Eaffi18104-RA,Egulf14970-RA,Egulf08386-RA,Egulf19251-RA,Eaff03131-RA,Egulf04523-RA,Eaffi09942-RA,Egulf16856-RA,Eaff12309-RA,Eaffi24088-RA,Eaffi19868-RA,Eaff10567-RA,
Molecular function	steroid binding	GO:0005496	4	2.01559e-06	2.02421	39	87	2671	12061	Eaff19173-RA,Egulf21938-RA,Egulf18406-RA,Eaffi21837-RA,Eaff02583-RA,Eaffi05864-RA,Eaff19987-RA,Egulf07745-RA,Eaffi07240-RA,Eaffi18038-RA,Eaffi16611-RA,Egulf18400-RA,Eaff03795-RA,Eaff09762-RA,Egulf15311-RA,Eaffi22535-RA,Egulf16551-RA,Eaffi21130-RA,Egulf10113-RA,Egulf04479-RA,Eaff12348-RA,Eaffi20239-RA,Eaff05782-RA,Egulf20867-RA,Egulf17820-RA,Eaffi09879-RA,Eaff01559-RA,Egulf08159-RA,Egulf09502-RA,E…
Molecular function	ATPase binding	GO:0051117	5	2.18714e-06	1.72817	62	162	2671	12061	Eaffi04572-RA,Eaff09398-RA,Egulf21938-RA,Eaff12097-RA,Eaffi03763-RA,Egulf18406-RA,Eaffi21837-RA,Eaff11643-RA,Eaffi05864-RA,Eaff19987-RA,Eaff10167-RA,Egulf07745-RA,Eaffi07240-RA,Egulf18192-RA,Egulf18190-RA,Egulf05340-RA,Eaffi18038-RA,Egulf19242-RA,Egulf18400-RA,Eaff10566-RA,Eaff09762-RA,Eaff09541-RA,Eaffi05417-RA,Egulf18239-RA,Egulf18840-RA,Egulf04479-RA,Eaff09487-RA,Eaff12348-RA,Eaff09795-RA,Eaff…
Molecular function	active transmembrane transporter activity	GO:0022804	4	2.23513e-06	1.37429	168	552	2671	12061	Eaffi04572-RA,Eaff17478-RA,Eaffi15139-RA,Eaff17998-RA,Eaff04677-RA,Eaff09690-RA,Eaffi00389-RA,Eaff16419-RA,Eaff03123-RA,Egulf21938-RA,Eaff04805-RA,Eaff12097-RA,Egulf06466-RA,Eaff16832-RA,Egulf00886-RA,Eaff10561-RA,Eaffi13587-RA,Egulf09059-RA,Egulf15931-RA,Eaffi03763-RA,Egulf02095-RA,Egulf18406-RA,Eaffi01694-RA,Eaffi21837-RA,Eaff11643-RA,Eaffi19291-RA,Egulf20268-RA,Eaffi05864-RA,Eaff18674-RA,Eaff0…
Molecular function	glutathione transferase activity	GO:0004364	5	2.75515e-06	2.63406	21	36	2671	12061	Egulf20904-RA,Eaff19173-RA,Eaffi21005-RA,Eaff01862-RA,Eaff06660-RA,Eaffi16611-RA,Eaffi14298-RA,Eaff06661-RA,Egulf20571-RA,Eaff07203-RA,Egulf16551-RA,Egulf20960-RA,Egulf08078-RA,Eaffi21006-RA,Egulf09639-RA,Eaff01863-RA,Egulf00217-RA,Eaff16919-RA,Eaff06905-RA,Egulf12847-RA,Egulf08077-RA,
Molecular function	RNA polymerase II cis-regulatory region sequence-specific DNA binding	GO:0000978	10	2.75523e-06	1.37286	166	546	2671	12061	Egulf01045-RA,Eaff01580-RA,Egulf01708-RA,Egulf13179-RA,Egulf18307-RA,Eaff11676-RA,Egulf09781-RA,Eaff02589-RA,Egulf05279-RA,Egulf19357-RA,Eaff12568-RA,Eaff00651-RA,Eaffi17950-RA,Eaff11772-RA,Eaffi18129-RA,Eaffi21782-RA,Eaffi11384-RA,Eaff08717-RA,Eaff10663-RA,Eaff02518-RA,Egulf12268-RA,Eaff09632-RA,Eaff10037-RA,Eaff02506-RA,Eaffi16267-RA,Eaff16196-RA,Eaffi04491-RA,Egulf01052-RA,Eaff12358-RA,Egulf01…
Molecular function	demethylase activity	GO:0032451	3	2.79875e-06	2.46302	24	44	2671	12061	Eaff11676-RA,Egulf05279-RA,Eaff02583-RA,Eaff09632-RA,Eaffi04491-RA,Eaff12159-RA,Egulf18267-RA,Eaff03795-RA,Eaffi05547-RA,Eaff09634-RA,Eaffi02965-RA,Eaffi08776-RA,Eaffi22535-RA,Egulf21900-RA,Eaffi20239-RA,Eaffi04490-RA,Egulf05278-RA,Eaff08366-RA,Eaffi17219-RA,Egulf05277-RA,Eaff17445-RA,Eaff05828-RA,Eaff12844-RA,Eaff11677-RA,
Molecular function	regulatory RNA binding	GO:0061980	6	2.80487e-06	2.25777	29	58	2671	12061	Eaff12249-RA,Eaff12209-RA,Eaff16264-RA,Eaffi16011-RA,Egulf18605-RA,Egulf04503-RA,Egulf04651-RA,Eaffi06013-RA,Eaffi19879-RA,Egulf10874-RA,Eaff09789-RA,Eaff17428-RA,Egulf12171-RA,Eaff09864-RA,Eaff18457-RA,Eaff12096-RA,Egulf13797-RA,Egulf04469-RA,Egulf15446-RA,Egulf18525-RA,Eaff12062-RA,Eaffi12746-RA,Eaff12208-RA,Eaffi05893-RA,Eaffi18746-RA,Eaffi00699-RA,Egulf22271-RA,Eaffi03598-RA,Eaffi03425-RA,
Molecular function	neuropeptide receptor activity	GO:0008188	7	2.80487e-06	2.25777	29	58	2671	12061	Eaff07460-RA,Eaff18894-RA,Eaff07423-RA,Eaff10384-RA,Egulf10298-RA,Eaff07643-RA,Eaff16995-RA,Eaff04008-RA,Egulf01239-RA,Egulf20133-RA,Egulf09641-RA,Egulf10392-RA,Egulf06440-RA,Egulf01248-RA,Egulf16016-RA,Egulf19067-RA,Egulf12865-RA,Eaff12719-RA,Eaff00405-RA,Eaff09222-RA,Eaffi08458-RA,Eaff03099-RA,Egulf20091-RA,Egulf01621-RA,Egulf10325-RA,Eaff18714-RA,Eaff03983-RA,Egulf13125-RA,Egulf19880-RA,
Molecular function	interleukin-2 receptor binding	GO:0005134	6	3.06993e-06	3.82084	11	13	2671	12061	Eaffi21782-RA,Eaff02518-RA,Egulf22016-RA,Eaffi21784-RA,Eaff05706-RA,Eaff05705-RA,Eaff05700-RA,Egulf22012-RA,Eaffi21408-RA,Egulf22019-RA,Eaff05711-RA,
Molecular function	myosin binding	GO:0017022	5	3.34823e-06	1.72568	60	157	2671	12061	Eaff00291-RA,Eaffi18953-RA,Eaff17998-RA,Egulf10541-RA,Eaffi23452-RA,Eaff11035-RA,Egulf13954-RA,Eaff09599-RA,Eaffi08671-RA,Eaff15663-RA,Eaff14106-RA,Egulf02238-RA,Egulf14314-RA,Eaffi08670-RA,Eaffi11705-RA,Egulf07430-RA,Eaff16146-RA,Eaffi05196-RA,Egulf17769-RA,Eaff10921-RA,Eaff08446-RA,Eaffi05303-RA,Eaffi01408-RA,Egulf17423-RA,Eaff01253-RA,Eaff14104-RA,Eaff13428-RA,Egulf01081-RA,Eaffi00267-RA,Egulf…
Molecular function	mRNA regulatory element binding translation repressor activity	GO:0000900	6	3.44904e-06	2.54723	22	39	2671	12061	Eaff18587-RA,Eaff16264-RA,Eaff17411-RA,Egulf15213-RA,Eaffi09601-RA,Eaff13393-RA,Eaffi08302-RA,Egulf15211-RA,Eaffi02108-RA,Egulf13797-RA,Egulf03243-RA,Egulf12193-RA,Eaffi09602-RA,Eaff18588-RA,Eaff08790-RA,Eaffi08301-RA,Eaffi18746-RA,Eaff01623-RA,Egulf01142-RA,Egulf07811-RA,Egulf17964-RA,Eaff14990-RA,
Molecular function	D1 dopamine receptor binding	GO:0031748	7	3.44904e-06	2.54723	22	39	2671	12061	Egulf21938-RA,Egulf18406-RA,Eaffi05864-RA,Eaff19987-RA,Egulf07745-RA,Eaffi07240-RA,Egulf14376-RA,Eaffi18038-RA,Egulf18400-RA,Eaff09762-RA,Eaffi18400-RA,Egulf04479-RA,Eaff12348-RA,Eaff05782-RA,Eaff01559-RA,Egulf09502-RA,Eaff09765-RA,Egulf18404-RA,Egulf19507-RA,Eaffi23876-RA,Eaffi01721-RA,Eaff02873-RA,
Molecular function	transmitter-gated monoatomic ion channel activity involved in regulation of postsynaptic membrane potential	GO:1904315	11	3.8932e-06	2.30037	27	53	2671	12061	Egulf13360-RA,Egulf07470-RA,Eaff16598-RA,Eaff01648-RA,Eaffi01328-RA,Egulf18192-RA,Egulf19242-RA,Eaff10566-RA,Eaffi15959-RA,Egulf18239-RA,Eaff01292-RA,Eaff09795-RA,Eaff09544-RA,Eaff10560-RA,Egulf20678-RA,Eaff09600-RA,Eaffi05420-RA,Egulf01081-RA,Eaff16597-RA,Eaff07012-RA,Egulf07844-RA,Egulf18432-RA,Eaffi19495-RA,Eaff09545-RA,Egulf19250-RA,Eaffi15958-RA,Eaff08743-RA,
Molecular function	neurotransmitter:sodium symporter activity	GO:0005328	9	4.1791e-06	2.80275	18	29	2671	12061	Egulf20268-RA,Egulf16610-RA,Eaff10850-RA,Eaffi01162-RA,Eaff01053-RA,Eaff19211-RA,Eaff16892-RA,Egulf06816-RA,Egulf12881-RA,Egulf07189-RA,Egulf07190-RA,Eaff07294-RA,Egulf20267-RA,Eaff00740-RA,Eaff18036-RA,Egulf21655-RA,Eaff06001-RA,Egulf19575-RA,
Molecular function	aldehyde dehydrogenase (NAD+) activity	GO:0004029	7	4.96895e-06	3.07878	15	22	2671	12061	Egulf16461-RA,Eaff19100-RA,Eaffi09244-RA,Eaff09647-RA,Egulf14013-RA,Egulf18280-RA,Egulf07549-RA,Eaff12524-RA,Eaffi03377-RA,Eaff16103-RA,Egulf04258-RA,Egulf00278-RA,Eaff07989-RA,Eaff07990-RA,Eaff01374-RA,
Molecular function	aldehyde dehydrogenase [NAD(P)+] activity	GO:0004030	6	4.96895e-06	3.07878	15	22	2671	12061	Egulf16461-RA,Eaff19100-RA,Eaffi09244-RA,Eaff09647-RA,Egulf14013-RA,Egulf18280-RA,Egulf07549-RA,Eaff12524-RA,Eaffi03377-RA,Eaff16103-RA,Egulf04258-RA,Egulf00278-RA,Eaff07989-RA,Eaff07990-RA,Eaff01374-RA,
Molecular function	dihydropyrimidinase activity	GO:0004157	6	5.7382e-06	4.51554	8	8	2671	12061	Egulf16866-RA,Eaff18959-RA,Egulf05810-RA,Eaff11236-RA,Egulf16277-RA,Eaff19409-RA,Eaffi05099-RA,Eaff18958-RA,
Molecular function	small molecule sensor activity	GO:0140299	2	5.7382e-06	4.51554	8	8	2671	12061	Eaff02181-RA,Egulf08518-RA,Eaff16892-RA,Eaff02605-RA,Egulf08807-RA,Egulf12881-RA,Eaff02180-RA,Egulf08519-RA,
Molecular function	myosin VI light chain binding	GO:0070856	7	5.7382e-06	4.51554	8	8	2671	12061	Eaffi18953-RA,Eaffi08671-RA,Eaff15663-RA,Egulf14314-RA,Eaffi08670-RA,Eaff08446-RA,Eaffi18954-RA,Egulf00743-RA,
Molecular function	myo-inositol transmembrane transporter activity	GO:0005365	6	5.7382e-06	4.51554	8	8	2671	12061	Eaff04677-RA,Egulf00886-RA,Egulf11029-RA,Egulf17477-RA,Eaff18578-RA,Eaff04678-RA,Egulf15238-RA,Eaff11355-RA,
Molecular function	BRE binding	GO:0042835	6	5.7382e-06	4.51554	8	8	2671	12061	Eaff18587-RA,Egulf15213-RA,Eaffi09601-RA,Egulf15211-RA,Eaffi09602-RA,Eaff18588-RA,Eaff01623-RA,Egulf07811-RA,
Molecular function	D-amino acid transmembrane transporter activity	GO:0042943	7	5.7382e-06	4.51554	8	8	2671	12061	Egulf06466-RA,Egulf02095-RA,Eaff00425-RA,Eaffi02118-RA,Egulf21912-RA,Eaff14243-RA,Eaffi00430-RA,Egulf15113-RA,
Molecular function	plus-end directed microfilament motor activity	GO:0060002	4	5.7382e-06	4.51554	8	8	2671	12061	Eaffi18953-RA,Eaffi08671-RA,Eaff15663-RA,Egulf14314-RA,Eaffi08670-RA,Eaff08446-RA,Eaffi18954-RA,Egulf00743-RA,
Molecular function	3-chloroallyl aldehyde dehydrogenase activity	GO:0004028	6	5.7382e-06	4.51554	8	8	2671	12061	Eaffi09244-RA,Egulf14013-RA,Egulf07549-RA,Eaff16103-RA,Egulf00278-RA,Eaff07989-RA,Eaff07990-RA,Eaff01374-RA,
Molecular function	GU repeat RNA binding	GO:1990605	6	5.7382e-06	4.51554	8	8	2671	12061	Egulf22344-RA,Egulf17545-RA,Egulf02838-RA,Egulf17257-RA,Eaff13524-RA,Eaff15509-RA,Egulf17156-RA,Eaff15268-RA,
Molecular function	glycine binding	GO:0016594	7	5.75611e-06	2.6811	19	32	2671	12061	Egulf13360-RA,Eaff10158-RA,Egulf10934-RA,Eaff16598-RA,Eaff04968-RA,Egulf02145-RA,Egulf01899-RA,Eaffi13417-RA,Eaff04548-RA,Eaff14433-RA,Eaffi15959-RA,Eaffi06391-RA,Eaff04595-RA,Egulf11354-RA,Egulf10869-RA,Eaff16597-RA,Egulf18832-RA,Eaffi15958-RA,Egulf21404-RA,
Molecular function	3',5'-cyclic-GMP phosphodiesterase activity	GO:0047555	9	6.48971e-06	3.16088	14	20	2671	12061	Eaff11504-RA,Eaffi08650-RA,Eaffi08649-RA,Eaff07985-RA,Eaff11503-RA,Eaffi04814-RA,Eaff08474-RA,Egulf00774-RA,Egulf17078-RA,Egulf00777-RA,Egulf05514-RA,Eaffi04815-RA,Eaff08475-RA,Egulf00273-RA,
Molecular function	telomeric DNA binding	GO:0042162	7	7.00864e-06	2.41529	23	43	2671	12061	Eaffi16011-RA,Egulf05132-RA,Egulf10724-RA,Eaff09632-RA,Eaff04422-RA,Eaffi19879-RA,Eaff13393-RA,Egulf18267-RA,Eaffi05547-RA,Eaff17428-RA,Eaff09634-RA,Egulf12171-RA,Eaffi02108-RA,Egulf12333-RA,Eaff20092-RA,Egulf03243-RA,Egulf18931-RA,Eaffi12904-RA,Eaffi00699-RA,Eaff05241-RA,Egulf17964-RA,Eaff14990-RA,Egulf11668-RA,
Molecular function	transcription corepressor activity	GO:0003714	4	7.26588e-06	1.52807	89	263	2671	12061	Egulf01045-RA,Egulf16993-RA,Egulf02293-RA,Eaff19521-RA,Egulf18704-RA,Eaff18703-RA,Egulf21619-RA,Eaff10016-RA,Eaff06068-RA,Egulf19357-RA,Egulf05615-RA,Eaff08717-RA,Eaff10663-RA,Egulf03182-RA,Eaffi23148-RA,Eaff10025-RA,Eaff02506-RA,Egulf01052-RA,Egulf21377-RA,Eaffi01264-RA,Egulf12427-RA,Eaff01141-RA,Egulf05520-RA,Egulf07283-RA,Eaff13446-RA,Eaffi02949-RA,Eaff12808-RA,Eaff19932-RA,Eaff12848-RA,Egulf0…
Molecular function	phosphatidylinositol phosphate kinase activity	GO:0016307	6	1.00107e-05	3.38665	12	16	2671	12061	Egulf11560-RA,Egulf05895-RA,Egulf07821-RA,Eaff05143-RA,Eaff03650-RA,Eaffi17484-RA,Eaff11164-RA,Eaffi01808-RA,Egulf12228-RA,Eaffi13620-RA,Eaff17382-RA,Eaff01630-RA,
Molecular function	adenyl nucleotide binding	GO:0030554	7	1.0385e-05	1.29273	215	751	2671	12061	Egulf20802-RA,Eaff12123-RA,Eaffi18953-RA,Eaff07804-RA,Eaff14623-RA,Eaff17998-RA,Eaffi16723-RA,Egulf18921-RA,Eaff16419-RA,Egulf21488-RA,Eaffi16338-RA,Eaff07714-RA,Egulf21938-RA,Egulf11514-RA,Egulf19787-RA,Eaffi11711-RA,Egulf20135-RA,Egulf05955-RA,Eaffi15323-RA,Eaffi08671-RA,Eaffi13587-RA,Egulf18406-RA,Eaffi20651-RA,Eaff20005-RA,Eaffi01694-RA,Eaffi21837-RA,Egulf03699-RA,Egulf00032-RA,Egulf13025-RA,…
Molecular function	monoatomic anion transmembrane transporter activity	GO:0008509	5	1.05984e-05	1.42851	118	373	2671	12061	Eaff15515-RA,Eaff07460-RA,Eaff10158-RA,Eaffi15139-RA,Eaff09690-RA,Egulf07470-RA,Eaff13502-RA,Egulf10934-RA,Egulf06466-RA,Eaff16787-RA,Eaff16832-RA,Eaffi19542-RA,Eaff01648-RA,Egulf09059-RA,Eaffi01328-RA,Egulf02095-RA,Egulf17829-RA,Eaff04968-RA,Egulf20268-RA,Eaff13187-RA,Eaff00425-RA,Egulf02145-RA,Eaff14897-RA,Egulf16610-RA,Egulf01899-RA,Egulf07538-RA,Eaff05741-RA,Eaffi13417-RA,Eaff10850-RA,Eaffi02…
Molecular function	histone H3 methyltransferase activity	GO:0140938	8	1.07547e-05	2.59985	19	33	2671	12061	Egulf15807-RA,Egulf05137-RA,Eaffi18129-RA,Eaffi13385-RA,Egulf09394-RA,Eaff15344-RA,Egulf17307-RA,Eaff10511-RA,Eaffi18131-RA,Eaffi23329-RA,Egulf17308-RA,Eaffi10856-RA,Egulf20305-RA,Egulf19452-RA,Eaff03108-RA,Eaff18124-RA,Egulf11327-RA,Eaff11827-RA,Eaffi00514-RA,
Molecular function	C-rich single-stranded DNA binding	GO:1990829	7	1.14374e-05	3.54792	11	14	2671	12061	Egulf14723-RA,Egulf15705-RA,Eaffi10725-RA,Eaff17712-RA,Eaff05959-RA,Eaffi02751-RA,Egulf21737-RA,Egulf15902-RA,Eaffi10317-RA,Eaff19964-RA,Eaff17713-RA,
Molecular function	transmembrane receptor protein serine/threonine kinase activity	GO:0004675	8	1.14374e-05	3.54792	11	14	2671	12061	Egulf20802-RA,Egulf16154-RA,Eaff18857-RA,Eaffi20926-RA,Egulf08691-RA,Egulf06374-RA,Eaff02009-RA,Egulf20016-RA,Eaff07515-RA,Eaff07111-RA,Eaff00345-RA,
Molecular function	transforming growth factor beta receptor activity	GO:0005024	9	1.14374e-05	3.54792	11	14	2671	12061	Egulf20802-RA,Egulf16154-RA,Eaff18857-RA,Eaffi20926-RA,Egulf08691-RA,Egulf06374-RA,Eaff02009-RA,Egulf20016-RA,Eaff07515-RA,Eaff07111-RA,Eaff00345-RA,
Molecular function	core promoter sequence-specific DNA binding	GO:0001046	9	1.20115e-05	1.71718	54	142	2671	12061	Egulf01045-RA,Eaff10964-RA,Eaff11772-RA,Eaffi18129-RA,Eaffi21782-RA,Eaff08717-RA,Eaff02518-RA,Egulf01052-RA,Egulf01189-RA,Egulf22016-RA,Egulf04883-RA,Egulf09394-RA,Eaff13446-RA,Eaffi21784-RA,Egulf05158-RA,Eaffi07177-RA,Egulf01049-RA,Eaff05706-RA,Eaff08711-RA,Egulf02909-RA,Eaff08831-RA,Eaff08716-RA,Eaffi18131-RA,Eaff12016-RA,Eaff05705-RA,Egulf05542-RA,Egulf01041-RA,Eaffi04825-RA,Eaffi08439-RA,Eaff…
Molecular function	neutral L-amino acid transmembrane transporter activity	GO:0015175	7	1.31377e-05	2.50863	20	36	2671	12061	Eaff15515-RA,Egulf06466-RA,Egulf02095-RA,Egulf20268-RA,Eaff00425-RA,Eaffi02118-RA,Egulf16671-RA,Eaff19261-RA,Eaff19211-RA,Egulf21912-RA,Eaff14243-RA,Eaff12179-RA,Eaff07294-RA,Egulf17160-RA,Egulf20267-RA,Eaff00740-RA,Eaffi00430-RA,Egulf04690-RA,Egulf15113-RA,Egulf19575-RA,
Molecular function	photoreceptor activity	GO:0009881	4	1.3519e-05	2.25777	25	50	2671	12061	Eaffi04572-RA,Egulf04654-RA,Eaff12097-RA,Eaffi03766-RA,Eaffi03763-RA,Eaff12204-RA,Eaff11643-RA,Egulf17966-RA,Egulf05598-RA,Eaff12203-RA,Egulf05340-RA,Eaff17232-RA,Eaffi05274-RA,Eaff14985-RA,Eaffi03762-RA,Eaff12200-RA,Eaff12098-RA,Egulf04652-RA,Eaff11103-RA,Egulf05949-RA,Egulf05597-RA,Eaff14984-RA,Eaff12207-RA,Egulf18238-RA,Egulf04662-RA,
Molecular function	DNA-binding transcription repressor activity	GO:0001217	4	1.36141e-05	1.54377	80	234	2671	12061	Egulf01045-RA,Egulf14723-RA,Egulf15705-RA,Egulf18307-RA,Eaffi10725-RA,Egulf09781-RA,Egulf19357-RA,Eaffi21782-RA,Eaff08717-RA,Eaff10663-RA,Eaff02518-RA,Egulf01052-RA,Eaff17712-RA,Eaff01612-RA,Eaff05959-RA,Eaffi02751-RA,Egulf01189-RA,Eaffi01264-RA,Egulf22016-RA,Eaffi17717-RA,Eaff01141-RA,Egulf12882-RA,Egulf09783-RA,Egulf07283-RA,Eaffi02949-RA,Egulf18305-RA,Eaff12848-RA,Eaffi21784-RA,Egulf01186-RA,E…
Molecular function	DNA-binding transcription repressor activity, RNA polymerase II-specific	GO:0001227	5	1.36141e-05	1.54377	80	234	2671	12061	Egulf01045-RA,Egulf14723-RA,Egulf15705-RA,Egulf18307-RA,Eaffi10725-RA,Egulf09781-RA,Egulf19357-RA,Eaffi21782-RA,Eaff08717-RA,Eaff10663-RA,Eaff02518-RA,Egulf01052-RA,Eaff17712-RA,Eaff01612-RA,Eaff05959-RA,Eaffi02751-RA,Egulf01189-RA,Eaffi01264-RA,Egulf22016-RA,Eaffi17717-RA,Eaff01141-RA,Egulf12882-RA,Egulf09783-RA,Egulf07283-RA,Eaffi02949-RA,Egulf18305-RA,Eaff12848-RA,Eaffi21784-RA,Egulf01186-RA,E…
Molecular function	cis-regulatory region sequence-specific DNA binding	GO:0000987	9	1.53514e-05	1.32072	179	612	2671	12061	Egulf01045-RA,Eaff01580-RA,Egulf01708-RA,Egulf13179-RA,Egulf18307-RA,Eaff11676-RA,Egulf09781-RA,Eaff02589-RA,Egulf05279-RA,Egulf19357-RA,Eaff12568-RA,Eaff00651-RA,Eaff10964-RA,Eaffi17950-RA,Eaff11772-RA,Eaffi18129-RA,Eaffi21782-RA,Egulf18569-RA,Eaffi11384-RA,Eaff08717-RA,Eaff10663-RA,Eaff02518-RA,Egulf12268-RA,Eaff09632-RA,Eaff10037-RA,Eaff02506-RA,Egulf18570-RA,Eaffi16267-RA,Eaff16196-RA,Eaffi04…
Molecular function	sodium channel regulator activity	GO:0017080	5	1.54895e-05	3.01036	14	21	2671	12061	Eaff09398-RA,Eaff03683-RA,Egulf10123-RA,Egulf02286-RA,Egulf17769-RA,Egulf09610-RA,Egulf04135-RA,Eaff09399-RA,Eaffi17908-RA,Eaffi22699-RA,Eaff03684-RA,Eaff14064-RA,Eaffi03012-RA,Eaff15087-RA,
Molecular function	pre-mRNA intronic binding	GO:0097157	7	1.6962e-05	2.77879	16	26	2671	12061	Egulf18552-RA,Eaffi16011-RA,Eaff19614-RA,Eaffi06050-RA,Eaffi02155-RA,Eaffi19879-RA,Eaff17428-RA,Egulf12171-RA,Egulf18551-RA,Egulf01305-RA,Egulf03283-RA,Eaff09890-RA,Eaffi06051-RA,Eaff08938-RA,Eaffi00699-RA,Eaffi23867-RA,
Molecular function	oxygen binding	GO:0019825	4	1.6962e-05	2.77879	16	26	2671	12061	Eaff02583-RA,Eaff02181-RA,Eaff03795-RA,Egulf08518-RA,Eaffi22535-RA,Eaffi21130-RA,Egulf10113-RA,Eaffi20239-RA,Eaff02605-RA,Egulf08807-RA,Eaffi09879-RA,Eaffi16074-RA,Eaff02180-RA,Eaffi17219-RA,Eaff17445-RA,Egulf08519-RA,
Molecular function	ABC-type transporter activity	GO:0140359	7	1.72246e-05	2.36528	22	42	2671	12061	Eaffi15139-RA,Eaffi00389-RA,Eaff16419-RA,Eaff16832-RA,Egulf09059-RA,Eaffi19291-RA,Eaffi19287-RA,Eaffi18218-RA,Eaff02834-RA,Eaff00400-RA,Egulf09324-RA,Eaff02837-RA,Eaff09004-RA,Egulf21992-RA,Egulf09064-RA,Eaff03044-RA,Egulf12940-RA,Egulf14331-RA,Eaff15683-RA,Eaff05733-RA,Egulf13577-RA,Eaff18076-RA,
Molecular function	amide binding	GO:0033218	3	1.99762e-05	1.36834	140	462	2671	12061	Eaff07460-RA,Egulf13360-RA,Eaff10158-RA,Eaffi06179-RA,Eaff18894-RA,Egulf21235-RA,Eaff19173-RA,Eaff11639-RA,Eaff03216-RA,Egulf21938-RA,Eaff04805-RA,Egulf10934-RA,Eaff16598-RA,Egulf21587-RA,Eaff03120-RA,Egulf18406-RA,Eaff20005-RA,Eaff06101-RA,Egulf19943-RA,Eaff04968-RA,Eaffi05864-RA,Egulf02145-RA,Egulf05413-RA,Egulf01899-RA,Eaff19987-RA,Egulf07745-RA,Eaffi14977-RA,Eaffi20360-RA,Eaffi13417-RA,Eaffi0…
Molecular function	G protein-coupled peptide receptor activity	GO:0008528	6	2.02771e-05	2.00691	32	72	2671	12061	Eaff07460-RA,Eaff18894-RA,Eaff07423-RA,Eaff10384-RA,Eaff03216-RA,Egulf10298-RA,Eaff07643-RA,Eaff16995-RA,Eaff04008-RA,Egulf01239-RA,Egulf20133-RA,Egulf09641-RA,Egulf10392-RA,Egulf06440-RA,Egulf16364-RA,Eaff05267-RA,Egulf01248-RA,Egulf16016-RA,Egulf19067-RA,Egulf12865-RA,Eaff12719-RA,Eaff00405-RA,Eaff09222-RA,Eaffi08458-RA,Eaff03099-RA,Egulf20091-RA,Egulf01621-RA,Egulf10325-RA,Eaff18714-RA,Eaff039…
Molecular function	nucleotide binding	GO:0000166	5	2.26773e-05	1.22629	299	1101	2671	12061	Egulf20802-RA,Eaff12123-RA,Eaffi05771-RA,Eaff07460-RA,Egulf06159-RA,Eaffi18953-RA,Eaff07804-RA,Eaff14623-RA,Egulf01364-RA,Eaff17998-RA,Eaffi16723-RA,Egulf18921-RA,Eaff16419-RA,Egulf22140-RA,Egulf21488-RA,Eaffi16338-RA,Eaff07714-RA,Egulf21938-RA,Egulf16073-RA,Eaff12733-RA,Eaffi16810-RA,Egulf11514-RA,Eaff17367-RA,Egulf19787-RA,Eaffi11711-RA,Egulf20135-RA,Egulf05955-RA,Egulf21587-RA,Eaffi07931-RA,Eg…
Molecular function	metal ion binding	GO:0046872	5	2.37601e-05	1.21069	333	1242	2671	12061	Egulf20802-RA,Eaffi09126-RA,Egulf13360-RA,Eaff10158-RA,Egulf16866-RA,Eaff18346-RA,Eaff16534-RA,Eaff17998-RA,Eaffi16723-RA,Eaffi16338-RA,Eaff07714-RA,Egulf21235-RA,Egulf15807-RA,Eaff19173-RA,Eaff17680-RA,Egulf21938-RA,Eaff04805-RA,Eaff12209-RA,Egulf13564-RA,Egulf10934-RA,Eaffi21005-RA,Eaff18318-RA,Eaff16598-RA,Eaffi10278-RA,Egulf19787-RA,Eaffi11711-RA,Eaff03977-RA,Egulf04503-RA,Egulf20135-RA,Egulf…
Molecular function	protein-tyrosine sulfotransferase activity	GO:0008476	6	2.59641e-05	4.51554	7	7	2671	12061	Eaffi21906-RA,Eaff05866-RA,Egulf20217-RA,Egulf19117-RA,Eaff19986-RA,Eaff07343-RA,Egulf21859-RA,
Molecular function	phosphotransferase activity, paired acceptors	GO:0016781	5	2.59641e-05	4.51554	7	7	2671	12061	Eaff14623-RA,Eaff10704-RA,Egulf09489-RA,Eaff03186-RA,Egulf03116-RA,Eaffi18049-RA,Eaffi07124-RA,
Molecular function	myosin light chain kinase activity	GO:0004687	8	2.59641e-05	4.51554	7	7	2671	12061	Egulf07505-RA,Eaffi12714-RA,Egulf07506-RA,Eaff04579-RA,Eaffi01489-RA,Egulf10913-RA,Eaff01337-RA,
Molecular function	selenide, water dikinase activity	GO:0004756	6	2.59641e-05	4.51554	7	7	2671	12061	Eaff14623-RA,Eaff10704-RA,Egulf09489-RA,Eaff03186-RA,Egulf03116-RA,Eaffi18049-RA,Eaffi07124-RA,
Molecular function	type II transforming growth factor beta receptor binding	GO:0005114	7	2.59641e-05	4.51554	7	7	2671	12061	Egulf20802-RA,Eaffi20926-RA,Eaffi23474-RA,Egulf08691-RA,Eaff02009-RA,Eaff15445-RA,Eaff07111-RA,
Molecular function	neuropeptide F receptor activity	GO:0042263	8	2.59641e-05	4.51554	7	7	2671	12061	Eaff18894-RA,Eaff16995-RA,Egulf01239-RA,Egulf09641-RA,Eaff03099-RA,Eaff18714-RA,Egulf13125-RA,
Molecular function	histone H3K27me2/H3K27me3 demethylase activity	GO:0071558	6	2.59641e-05	4.51554	7	7	2671	12061	Eaff11676-RA,Egulf05279-RA,Eaffi04491-RA,Eaffi04490-RA,Egulf05278-RA,Egulf05277-RA,Eaff11677-RA,
Molecular function	thymine binding	GO:0002059	6	2.59641e-05	4.51554	7	7	2671	12061	Egulf16866-RA,Egulf05810-RA,Eaff11236-RA,Egulf16277-RA,Eaff19409-RA,Eaffi05099-RA,Eaff18958-RA,
Molecular function	1-phosphatidylinositol-4-phosphate 3-kinase activity	GO:0035005	7	2.59641e-05	4.51554	7	7	2671	12061	Egulf05895-RA,Egulf07821-RA,Eaff11164-RA,Eaffi01808-RA,Egulf12228-RA,Eaff17382-RA,Eaff01630-RA,
Molecular function	carbon dioxide transmembrane transporter activity	GO:0035379	4	2.59641e-05	4.51554	7	7	2671	12061	Egulf03616-RA,Eaffi24131-RA,Egulf00082-RA,Egulf14879-RA,Eaff13076-RA,Eaff17861-RA,Eaff07830-RA,
Molecular function	tyrosine binding	GO:0072545	7	2.59641e-05	4.51554	7	7	2671	12061	Eaff12123-RA,Eaffi03890-RA,Eaff12122-RA,Egulf04752-RA,Eaffi03891-RA,Egulf10772-RA,Eaff04459-RA,
Molecular function	activin receptor activity, type I	GO:0016361	10	2.59641e-05	4.51554	7	7	2671	12061	Egulf20802-RA,Eaffi20926-RA,Egulf08691-RA,Eaff02009-RA,Egulf20016-RA,Eaff07515-RA,Eaff07111-RA,
Molecular function	sequence-specific DNA binding	GO:0043565	6	2.66877e-05	1.23392	279	1021	2671	12061	Egulf01045-RA,Eaff01580-RA,Egulf01708-RA,Egulf02293-RA,Egulf13179-RA,Egulf18307-RA,Eaff11676-RA,Egulf09781-RA,Egulf15807-RA,Eaff19058-RA,Eaff02589-RA,Egulf18552-RA,Eaffi16011-RA,Egulf05279-RA,Eaff17367-RA,Egulf19357-RA,Eaff12568-RA,Eaffi03884-RA,Eaff00651-RA,Eaff10964-RA,Eaffi17950-RA,Eaff11772-RA,Eaff19614-RA,Egulf01469-RA,Eaffi18129-RA,Egulf05132-RA,Eaffi21782-RA,Egulf01470-RA,Egulf18569-RA,Egu…
Molecular function	nucleoside phosphate binding	GO:1901265	4	2.84687e-05	1.22296	299	1104	2671	12061	Egulf20802-RA,Eaff12123-RA,Eaffi05771-RA,Eaff07460-RA,Egulf06159-RA,Eaffi18953-RA,Eaff07804-RA,Eaff14623-RA,Egulf01364-RA,Eaff17998-RA,Eaffi16723-RA,Egulf18921-RA,Eaff16419-RA,Egulf22140-RA,Egulf21488-RA,Eaffi16338-RA,Eaff07714-RA,Egulf21938-RA,Egulf16073-RA,Eaff12733-RA,Eaffi16810-RA,Egulf11514-RA,Eaff17367-RA,Egulf19787-RA,Eaffi11711-RA,Egulf20135-RA,Egulf05955-RA,Egulf21587-RA,Eaffi07931-RA,Eg…
Molecular function	neurotransmitter receptor activity involved in regulation of postsynaptic membrane potential	GO:0099529	6	3.23692e-05	2.10206	27	58	2671	12061	Egulf13360-RA,Egulf07470-RA,Eaff16598-RA,Eaff01648-RA,Eaffi01328-RA,Egulf18192-RA,Egulf19242-RA,Eaff10566-RA,Eaffi15959-RA,Egulf18239-RA,Eaff01292-RA,Eaff09795-RA,Eaff09544-RA,Eaff10560-RA,Egulf20678-RA,Eaff09600-RA,Eaffi05420-RA,Egulf01081-RA,Eaff16597-RA,Eaff07012-RA,Egulf07844-RA,Egulf18432-RA,Eaffi19495-RA,Eaff09545-RA,Egulf19250-RA,Eaffi15958-RA,Eaff08743-RA,
Molecular function	U6 snRNA binding	GO:0017070	7	3.39004e-05	2.87352	14	22	2671	12061	Egulf01213-RA,Eaffi02909-RA,Eaffi02910-RA,Eaff14371-RA,Eaff12861-RA,Eaff16653-RA,Egulf01305-RA,Eaff08856-RA,Eaffi12076-RA,Eaff08938-RA,Egulf01955-RA,Eaffi23867-RA,Eaff14372-RA,Eaff12859-RA,
Molecular function	protein methyltransferase activity	GO:0008276	6	3.84284e-05	1.75826	44	113	2671	12061	Eaffi16694-RA,Egulf15807-RA,Egulf05137-RA,Eaff17367-RA,Egulf01469-RA,Eaffi18129-RA,Egulf01470-RA,Eaff02506-RA,Eaffi13385-RA,Eaff15853-RA,Eaff18086-RA,Egulf09394-RA,Eaffi13655-RA,Eaff15344-RA,Eaffi18772-RA,Eaff08341-RA,Eaff16174-RA,Egulf17307-RA,Eaff09093-RA,Eaffi07912-RA,Eaffi00359-RA,Eaff10511-RA,Eaffi18131-RA,Eaffi23329-RA,Egulf17308-RA,Egulf13913-RA,Eaffi10856-RA,Egulf20305-RA,Egulf00635-RA,Eg…
Molecular function	telomeric repeat-containing RNA binding	GO:0061752	6	4.15014e-05	4.01381	8	9	2671	12061	Eaffi16011-RA,Eaff09632-RA,Eaffi19879-RA,Egulf18267-RA,Eaffi05547-RA,Eaff17428-RA,Eaff09634-RA,Eaffi00699-RA,
Molecular function	DNA-binding transcription activator activity	GO:0001216	4	4.35064e-05	1.36738	129	426	2671	12061	Egulf01045-RA,Eaff01580-RA,Egulf01708-RA,Egulf13179-RA,Egulf09781-RA,Eaff02589-RA,Eaff12568-RA,Egulf22344-RA,Eaff00651-RA,Eaff10964-RA,Eaffi17950-RA,Eaffi21782-RA,Eaffi11384-RA,Eaff08717-RA,Eaff02518-RA,Eaffi16673-RA,Egulf12268-RA,Eaff10037-RA,Eaff16196-RA,Egulf01052-RA,Eaff12358-RA,Egulf04924-RA,Egulf01189-RA,Eaffi01264-RA,Egulf22016-RA,Egulf17545-RA,Eaff17293-RA,Eaff07399-RA,Egulf13366-RA,Eaffi…
Molecular function	DNA-binding transcription activator activity, RNA polymerase II-specific	GO:0001228	5	4.35064e-05	1.36738	129	426	2671	12061	Egulf01045-RA,Eaff01580-RA,Egulf01708-RA,Egulf13179-RA,Egulf09781-RA,Eaff02589-RA,Eaff12568-RA,Egulf22344-RA,Eaff00651-RA,Eaff10964-RA,Eaffi17950-RA,Eaffi21782-RA,Eaffi11384-RA,Eaff08717-RA,Eaff02518-RA,Eaffi16673-RA,Egulf12268-RA,Eaff10037-RA,Eaff16196-RA,Egulf01052-RA,Eaff12358-RA,Egulf04924-RA,Egulf01189-RA,Eaffi01264-RA,Egulf22016-RA,Egulf17545-RA,Eaff17293-RA,Eaff07399-RA,Egulf13366-RA,Eaffi…
Molecular function	leucine binding	GO:0070728	7	4.4789e-05	3.69453	9	11	2671	12061	Egulf10345-RA,Eaff15956-RA,Eaff14417-RA,Egulf10131-RA,Egulf01912-RA,Egulf10130-RA,Eaffi11958-RA,Eaff04028-RA,Egulf14185-RA,
Molecular function	ATP hydrolysis activity	GO:0016887	8	4.55103e-05	1.26721	213	759	2671	12061	Eaffi04572-RA,Egulf18131-RA,Eaffi15139-RA,Eaffi18953-RA,Eaff14062-RA,Eaff17998-RA,Egulf05583-RA,Eaff09690-RA,Eaffi00389-RA,Eaffi19653-RA,Eaff16419-RA,Eaffi12832-RA,Eaff13293-RA,Egulf21488-RA,Egulf07727-RA,Eaffi12946-RA,Eaff02890-RA,Egulf21938-RA,Eaff12097-RA,Eaffi23121-RA,Eaffi04334-RA,Egulf11514-RA,Eaff16832-RA,Egulf02290-RA,Egulf00432-RA,Eaffi08671-RA,Egulf02289-RA,Eaff11772-RA,Eaffi13587-RA,Eg…
Molecular function	heme binding	GO:0020037	5	4.71856e-05	2.06643	27	59	2671	12061	Egulf18921-RA,Egulf05955-RA,Eaff04505-RA,Egulf06586-RA,Eaff02181-RA,Eaff00543-RA,Eaff08702-RA,Egulf08518-RA,Egulf17270-RA,Eaffi05271-RA,Eaffi14691-RA,Eaff02605-RA,Eaffi12800-RA,Egulf08807-RA,Egulf17791-RA,Eaffi23723-RA,Egulf15930-RA,Eaff10237-RA,Egulf10821-RA,Eaff02180-RA,Eaff15438-RA,Eaff11096-RA,Eaff06970-RA,Eaffi06469-RA,Egulf01029-RA,Eaff18673-RA,Egulf08519-RA,
Molecular function	dynein heavy chain binding	GO:0045504	4	4.78585e-05	2.70932	15	25	2671	12061	Egulf01364-RA,Egulf05152-RA,Eaff08256-RA,Egulf12491-RA,Eaff11782-RA,Eaff02232-RA,Egulf10359-RA,Eaffi04354-RA,Eaff09002-RA,Eaff18245-RA,Egulf15653-RA,Egulf02100-RA,Eaff17198-RA,Egulf00553-RA,Eaff14235-RA,
Molecular function	peptide receptor activity	GO:0001653	4	5.46253e-05	1.92663	32	75	2671	12061	Eaff07460-RA,Eaff18894-RA,Eaff07423-RA,Eaff10384-RA,Eaff03216-RA,Egulf10298-RA,Eaff07643-RA,Eaff16995-RA,Eaff04008-RA,Egulf01239-RA,Egulf20133-RA,Egulf09641-RA,Egulf10392-RA,Egulf06440-RA,Egulf16364-RA,Eaff05267-RA,Egulf01248-RA,Egulf16016-RA,Egulf19067-RA,Egulf12865-RA,Eaff12719-RA,Eaff00405-RA,Eaff09222-RA,Eaffi08458-RA,Eaff03099-RA,Egulf20091-RA,Egulf01621-RA,Egulf10325-RA,Eaff18714-RA,Eaff039…
Molecular function	transcription regulatory region nucleic acid binding	GO:0001067	5	5.56699e-05	1.24319	242	879	2671	12061	Egulf01045-RA,Eaff01580-RA,Egulf01708-RA,Egulf02293-RA,Egulf13179-RA,Egulf18307-RA,Eaff11676-RA,Egulf09781-RA,Egulf15807-RA,Eaff19058-RA,Eaff02589-RA,Egulf18552-RA,Eaffi16011-RA,Egulf05279-RA,Egulf19357-RA,Eaff12568-RA,Eaffi03884-RA,Eaff00651-RA,Eaff10964-RA,Eaffi17950-RA,Eaff11772-RA,Eaff19614-RA,Egulf01469-RA,Eaffi18129-RA,Eaffi21782-RA,Egulf01470-RA,Egulf18569-RA,Eaffi11384-RA,Eaff08717-RA,Eaf…
Molecular function	oxidoreductase activity, acting on CH or CH2 groups	GO:0016725	4	5.63131e-05	2.3832	19	36	2671	12061	Egulf16073-RA,Eaff02583-RA,Egulf16439-RA,Eaffi16531-RA,Eaff03795-RA,Eaff16871-RA,Eaffi22535-RA,Egulf04950-RA,Eaffi21130-RA,Egulf10113-RA,Eaffi20001-RA,Eaffi20239-RA,Eaffi04109-RA,Eaffi09879-RA,Eaffi16074-RA,Eaffi17219-RA,Eaff17445-RA,Eaff18826-RA,Eaff19084-RA,
Molecular function	heparin binding	GO:0008201	5	6.3277e-05	1.9841	29	66	2671	12061	Eaff10707-RA,Eaff10441-RA,Eaff03977-RA,Egulf04927-RA,Egulf15225-RA,Egulf19131-RA,Egulf08473-RA,Eaff17586-RA,Eaff11986-RA,Eaffi04079-RA,Egulf19792-RA,Egulf04928-RA,Eaffi10352-RA,Eaff11984-RA,Egulf14907-RA,Egulf13814-RA,Eaff10708-RA,Eaffi19020-RA,Egulf20876-RA,Eaff03976-RA,Egulf10293-RA,Eaff16245-RA,Eaff03778-RA,Eaff18562-RA,Eaff02221-RA,Eaffi06737-RA,Eaff07178-RA,Eaffi10269-RA,Eaff11985-RA,
Molecular function	adenyl ribonucleotide binding	GO:0032559	8	6.8574e-05	1.28322	185	651	2671	12061	Egulf20802-RA,Eaff12123-RA,Eaffi18953-RA,Eaff07804-RA,Eaff14623-RA,Eaff17998-RA,Eaffi16723-RA,Eaff16419-RA,Egulf21488-RA,Eaffi16338-RA,Eaff07714-RA,Egulf21938-RA,Egulf11514-RA,Egulf19787-RA,Eaffi11711-RA,Egulf20135-RA,Eaffi15323-RA,Eaffi08671-RA,Eaffi13587-RA,Egulf18406-RA,Eaffi20651-RA,Eaff20005-RA,Eaffi01694-RA,Eaffi21837-RA,Egulf03699-RA,Egulf00032-RA,Egulf13025-RA,Egulf19943-RA,Eaff15663-RA,E…
Molecular function	ABC-type xenobiotic transporter activity	GO:0008559	8	8.7599e-05	3.10443	11	16	2671	12061	Eaffi00389-RA,Eaff16419-RA,Eaffi19291-RA,Eaffi19287-RA,Eaffi18218-RA,Eaff00400-RA,Egulf09324-RA,Egulf21992-RA,Eaff03044-RA,Eaff05733-RA,Eaff18076-RA,
Molecular function	postsynaptic neurotransmitter receptor activity	GO:0098960	5	8.81839e-05	1.95449	29	67	2671	12061	Egulf13360-RA,Egulf07470-RA,Eaff16598-RA,Eaff01648-RA,Eaffi01328-RA,Egulf18192-RA,Egulf19242-RA,Eaff10566-RA,Eaffi15959-RA,Egulf18239-RA,Eaff01292-RA,Eaff09795-RA,Eaff09544-RA,Eaff10560-RA,Egulf20678-RA,Eaff09600-RA,Eaffi05420-RA,Egulf11416-RA,Egulf01081-RA,Eaff16597-RA,Eaff07012-RA,Egulf07844-RA,Egulf18432-RA,Eaffi19495-RA,Eaff09545-RA,Egulf19250-RA,Eaffi15958-RA,Egulf11417-RA,Eaff08743-RA,
Molecular function	oxidoreductase activity	GO:0016491	3	8.85007e-05	1.25081	218	787	2671	12061	Eaffi05771-RA,Eaffi05403-RA,Eaff11931-RA,Egulf20904-RA,Eaff18346-RA,Egulf21133-RA,Eaffi16723-RA,Eaffi18568-RA,Egulf18921-RA,Eaff03123-RA,Eaff11676-RA,Egulf01388-RA,Eaffi16338-RA,Eaff03916-RA,Eaff04805-RA,Egulf14212-RA,Egulf16073-RA,Eaff17820-RA,Egulf05279-RA,Eaff12733-RA,Eaffi14067-RA,Egulf05955-RA,Eaffi07931-RA,Egulf16380-RA,Egulf21604-RA,Egulf16461-RA,Eaff19100-RA,Eaffi19696-RA,Eaffi11588-RA,Eg…
Molecular function	carbohydrate derivative binding	GO:0097367	3	9.17909e-05	1.20576	298	1116	2671	12061	Egulf20802-RA,Eaff12123-RA,Eaff07460-RA,Egulf06159-RA,Eaffi18953-RA,Eaff07804-RA,Eaff14623-RA,Egulf01364-RA,Eaff10707-RA,Eaff17998-RA,Eaffi16723-RA,Eaff16419-RA,Egulf22140-RA,Egulf21488-RA,Eaffi16338-RA,Eaff07714-RA,Eaff10441-RA,Egulf21938-RA,Eaff12745-RA,Eaffi16810-RA,Egulf11514-RA,Egulf19787-RA,Eaffi11711-RA,Eaff03977-RA,Egulf20135-RA,Egulf21587-RA,Eaffi15323-RA,Egulf00279-RA,Eaffi08671-RA,Eaff…
Molecular function	mRNA CDS binding	GO:1990715	7	9.88858e-05	2.79533	13	21	2671	12061	Egulf18552-RA,Eaffi16011-RA,Eaff19614-RA,Eaffi06050-RA,Eaffi02155-RA,Eaffi19879-RA,Eaff17428-RA,Egulf12171-RA,Egulf18551-RA,Egulf03283-RA,Eaff09890-RA,Eaffi06051-RA,Eaffi00699-RA,
Molecular function	RNA polymerase II intronic transcription regulatory region sequence-specific DNA binding	GO:0001162	10	9.88858e-05	2.79533	13	21	2671	12061	Eaffi21782-RA,Egulf22016-RA,Egulf22015-RA,Eaffi21784-RA,Eaff05706-RA,Eaffi21783-RA,Eaff05705-RA,Eaff05700-RA,Egulf22012-RA,Eaffi21408-RA,Eaff05707-RA,Egulf22019-RA,Eaff05711-RA,
Molecular function	phosphatidylinositol-4,5-bisphosphate 3-kinase activity	GO:0046934	7	9.88858e-05	2.79533	13	21	2671	12061	Egulf05895-RA,Egulf14376-RA,Eaffi18400-RA,Egulf07821-RA,Eaff06642-RA,Eaff11164-RA,Eaffi14283-RA,Egulf20978-RA,Eaff06644-RA,Eaffi01808-RA,Eaff06643-RA,Eaff02873-RA,Eaff01630-RA,
Molecular function	transcription cis-regulatory region binding	GO:0000976	8	0.000108785	1.23435	237	867	2671	12061	Egulf01045-RA,Eaff01580-RA,Egulf01708-RA,Egulf02293-RA,Egulf13179-RA,Egulf18307-RA,Eaff11676-RA,Egulf09781-RA,Egulf15807-RA,Eaff19058-RA,Eaff02589-RA,Egulf18552-RA,Egulf05279-RA,Egulf19357-RA,Eaff12568-RA,Eaffi03884-RA,Eaff00651-RA,Eaff10964-RA,Eaffi17950-RA,Eaff11772-RA,Eaff19614-RA,Egulf01469-RA,Eaffi18129-RA,Eaffi21782-RA,Egulf01470-RA,Egulf18569-RA,Eaffi11384-RA,Eaff08717-RA,Eaff10663-RA,Eaff…
Molecular function	calmodulin-activated dual specificity 3',5'-cyclic-GMP, 3',5'-cyclic-AMP phosphodiesterase activity	GO:0004117	10	0.000117447	4.51554	6	6	2671	12061	Eaffi08650-RA,Eaffi08649-RA,Eaff08474-RA,Egulf00774-RA,Egulf00777-RA,Eaff08475-RA,
Molecular function	translation factor activity, non-nucleic acid binding	GO:0045183	3	0.000117447	4.51554	6	6	2671	12061	Egulf05924-RA,Eaffi05715-RA,Eaff09485-RA,Eaffi05184-RA,Egulf18123-RA,Eaff11134-RA,
Molecular function	testosterone 16-alpha-hydroxylase activity	GO:0008390	6	0.000117447	4.51554	6	6	2671	12061	Eaff02583-RA,Eaff03795-RA,Eaffi22535-RA,Eaffi20239-RA,Eaffi17219-RA,Eaff17445-RA,
Molecular function	protein kinase C inhibitor activity	GO:0008426	3	0.000117447	4.51554	6	6	2671	12061	Eaff16081-RA,Eaff20185-RA,Egulf03183-RA,Egulf14044-RA,Eaff13756-RA,Egulf02593-RA,
Molecular function	glyceraldehyde-3-phosphate dehydrogenase (NAD+) (phosphorylating) activity	GO:0004365	7	0.000117447	4.51554	6	6	2671	12061	Eaff11931-RA,Egulf13034-RA,Egulf04992-RA,Eaffi16715-RA,Eaffi04162-RA,Eaff16785-RA,
Molecular function	semaphorin receptor activity	GO:0017154	5	0.000117447	4.51554	6	6	2671	12061	Eaff10707-RA,Egulf17362-RA,Egulf15225-RA,Eaff10708-RA,Eaff18562-RA,Egulf17364-RA,
Molecular function	neuropeptide Y receptor activity	GO:0004983	8	0.000117447	4.51554	6	6	2671	12061	Eaff18894-RA,Eaff16995-RA,Egulf01239-RA,Eaff03099-RA,Eaff18714-RA,Egulf13125-RA,
Molecular function	neurotrophin receptor activity	GO:0005030	4	0.000117447	4.51554	6	6	2671	12061	Eaffi20515-RA,Eaff05474-RA,Egulf10204-RA,Egulf16226-RA,Eaffi17296-RA,Egulf22274-RA,
Molecular function	nucleoside phosphotransferase activity	GO:0050146	7	0.000117447	4.51554	6	6	2671	12061	Eaffi14731-RA,Egulf20689-RA,Eaff07023-RA,Eaff05204-RA,Egulf19858-RA,Eaffi15029-RA,
Molecular function	interleukin-5 receptor binding	GO:0005137	6	0.000117447	4.51554	6	6	2671	12061	Eaff06883-RA,Eaffi14602-RA,Egulf18979-RA,Eaff06884-RA,Egulf20546-RA,Eaff10291-RA,
Molecular function	neutral L-amino acid:sodium symporter activity	GO:0005295	11	0.000117447	4.51554	6	6	2671	12061	Egulf20268-RA,Eaff19211-RA,Eaff07294-RA,Egulf20267-RA,Eaff00740-RA,Egulf19575-RA,
Molecular function	peptide YY receptor activity	GO:0001601	9	0.000117447	4.51554	6	6	2671	12061	Eaff18894-RA,Eaff16995-RA,Egulf01239-RA,Eaff03099-RA,Eaff18714-RA,Egulf13125-RA,
Molecular function	pancreatic polypeptide receptor activity	GO:0001602	9	0.000117447	4.51554	6	6	2671	12061	Eaff18894-RA,Eaff16995-RA,Egulf01239-RA,Eaff03099-RA,Eaff18714-RA,Egulf13125-RA,
Molecular function	neuromedin U receptor activity	GO:0001607	8	0.000117447	4.51554	6	6	2671	12061	Eaff07460-RA,Egulf01248-RA,Egulf12865-RA,Eaff09222-RA,Egulf20091-RA,Egulf01621-RA,
Molecular function	RNA transmembrane transporter activity	GO:0051033	6	0.000117447	4.51554	6	6	2671	12061	Eaffi16011-RA,Eaffi19879-RA,Eaff17428-RA,Eaff19413-RA,Egulf16871-RA,Eaffi00699-RA,
Molecular function	neuromedin U binding	GO:0042924	6	0.000117447	4.51554	6	6	2671	12061	Eaff07460-RA,Egulf01248-RA,Egulf12865-RA,Eaff09222-RA,Egulf20091-RA,Egulf01621-RA,
Molecular function	NFAT protein binding	GO:0051525	7	0.000117447	4.51554	6	6	2671	12061	Eaff16196-RA,Egulf03323-RA,Egulf13893-RA,Eaff05712-RA,Eaff05714-RA,Eaff13312-RA,
Molecular function	P-type divalent copper transporter activity	GO:0043682	9	0.000117447	4.51554	6	6	2671	12061	Eaffi13587-RA,Egulf11522-RA,Eaffi01858-RA,Eaff05116-RA,Eaff01672-RA,Egulf07865-RA,
Molecular function	glyceraldehyde-3-phosphate dehydrogenase (NAD(P)+) (phosphorylating) activity	GO:0043891	6	0.000117447	4.51554	6	6	2671	12061	Eaff11931-RA,Egulf13034-RA,Egulf04992-RA,Eaffi16715-RA,Eaffi04162-RA,Eaff16785-RA,
Molecular function	histone H2A acetyltransferase activity	GO:0043998	11	0.000117447	4.51554	6	6	2671	12061	Eaff16862-RA,Eaffi04549-RA,Egulf05324-RA,Egulf07013-RA,Egulf12918-RA,Eaff11658-RA,
Molecular function	calmodulin-activated 3',5'-cyclic-GMP phosphodiesterase activity	GO:0048101	10	0.000117447	4.51554	6	6	2671	12061	Eaffi08650-RA,Eaffi08649-RA,Eaff08474-RA,Egulf00774-RA,Egulf00777-RA,Eaff08475-RA,
Molecular function	glycine:sodium symporter activity	GO:0015375	12	0.000117447	4.51554	6	6	2671	12061	Egulf20268-RA,Eaff19211-RA,Eaff07294-RA,Egulf20267-RA,Eaff00740-RA,Egulf19575-RA,
Molecular function	oxygen sensor activity	GO:0019826	5	0.000117447	4.51554	6	6	2671	12061	Eaff02181-RA,Egulf08518-RA,Eaff02605-RA,Egulf08807-RA,Eaff02180-RA,Egulf08519-RA,
Molecular function	protein binding	GO:0005515	3	0.000121339	1.05292	1646	7059	2671	12061	Egulf04437-RA,Eaffi21345-RA,Eaff12249-RA,Eaffi21906-RA,Eaff06489-RA,Egulf20802-RA,Eaffi14133-RA,Egulf01045-RA,Eaff12123-RA,Eaff15515-RA,Eaff09079-RA,Eaff09080-RA,Egulf21337-RA,Eaff05827-RA,Eaffi04572-RA,Eaff18587-RA,Eaff01580-RA,Eaff01338-RA,Egulf01708-RA,Eaffi07939-RA,Egulf06159-RA,Eaffi16694-RA,Eaff11931-RA,Eaff04731-RA,Eaff01936-RA,Eaffi08922-RA,Egulf16993-RA,Egulf13360-RA,Egulf18131-RA,Eaff00…
Molecular function	G protein-coupled receptor binding	GO:0001664	5	0.000125693	1.50518	69	207	2671	12061	Eaffi21345-RA,Eaff17998-RA,Egulf21938-RA,Eaff03120-RA,Egulf18406-RA,Eaff10013-RA,Eaffi05864-RA,Eaff05947-RA,Eaff19987-RA,Egulf07745-RA,Eaff06883-RA,Egulf08895-RA,Eaffi07240-RA,Egulf09416-RA,Eaff13951-RA,Eaffi14602-RA,Egulf14376-RA,Eaffi18038-RA,Egulf02406-RA,Eaff10014-RA,Egulf18400-RA,Egulf18979-RA,Eaff09762-RA,Eaffi18400-RA,Eaff06884-RA,Eaff16438-RA,Egulf21750-RA,Egulf01435-RA,Eaff12596-RA,Egulf…
Molecular function	myosin II binding	GO:0045159	6	0.000140773	2.85192	12	19	2671	12061	Eaff17998-RA,Eaffi23452-RA,Eaff09599-RA,Egulf07430-RA,Eaffi05196-RA,Eaffi01408-RA,Egulf17423-RA,Eaff01253-RA,Eaffi10227-RA,Eaff15426-RA,Egulf15056-RA,Eaffi05489-RA,
Molecular function	oxidoreductase activity, acting on the aldehyde or oxo group of donors	GO:0016903	4	0.000152706	1.80621	34	85	2671	12061	Eaff11931-RA,Egulf16073-RA,Egulf16461-RA,Eaff19100-RA,Egulf13034-RA,Eaffi09244-RA,Egulf16439-RA,Eaff09647-RA,Eaffi16531-RA,Egulf14013-RA,Egulf18280-RA,Egulf04992-RA,Egulf07549-RA,Eaff16871-RA,Eaff02759-RA,Eaff02760-RA,Egulf04950-RA,Eaffi20001-RA,Eaff12524-RA,Eaffi16715-RA,Eaffi04109-RA,Eaffi04162-RA,Eaffi03377-RA,Eaff16103-RA,Egulf04258-RA,Egulf00278-RA,Eaff07989-RA,Eaff07990-RA,Eaff16785-RA,Eaff…
Molecular function	flavin adenine dinucleotide binding	GO:0050660	6	0.000154872	1.69333	42	112	2671	12061	Eaffi05771-RA,Egulf18921-RA,Egulf16073-RA,Eaff12733-RA,Egulf05955-RA,Eaffi07931-RA,Egulf21604-RA,Eaff09632-RA,Egulf06586-RA,Egulf05413-RA,Egulf16439-RA,Eaffi18575-RA,Eaffi16531-RA,Egulf18267-RA,Eaff00543-RA,Eaff08702-RA,Eaffi05547-RA,Egulf18321-RA,Eaff12976-RA,Eaff16871-RA,Eaff09634-RA,Egulf04950-RA,Eaffi05271-RA,Egulf01460-RA,Eaffi20001-RA,Eaffi04109-RA,Eaffi04678-RA,Eaffi23723-RA,Eaff09084-RA,E…
Molecular function	intramolecular oxidoreductase activity, transposing S-S bonds	GO:0016864	5	0.000155089	2.11366	22	47	2671	12061	Egulf21133-RA,Egulf01388-RA,Eaffi14067-RA,Egulf16380-RA,Eaffi11588-RA,Eaff03298-RA,Egulf14385-RA,Eaff14096-RA,Egulf09851-RA,Egulf00337-RA,Eaff14652-RA,Eaffi18282-RA,Eaff08044-RA,Eaff15894-RA,Eaffi18404-RA,Eaff06488-RA,Eaff03578-RA,Eaffi11713-RA,Egulf02246-RA,Eaffi09173-RA,Egulf09597-RA,Egulf03082-RA,
Molecular function	sodium channel activity	GO:0005272	8	0.000155089	2.11366	22	47	2671	12061	Eaff00486-RA,Eaff03120-RA,Egulf01295-RA,Egulf10123-RA,Egulf09416-RA,Egulf04530-RA,Egulf17008-RA,Egulf10471-RA,Egulf01294-RA,Egulf01081-RA,Eaff16050-RA,Eaff04144-RA,Eaff08927-RA,Eaff01920-RA,Eaff12302-RA,Egulf09415-RA,Eaffi03621-RA,Egulf06523-RA,Egulf08016-RA,Eaffi08153-RA,Egulf14076-RA,Eaff08743-RA,
Molecular function	protein disulfide isomerase activity	GO:0003756	6	0.000155089	2.11366	22	47	2671	12061	Egulf21133-RA,Egulf01388-RA,Eaffi14067-RA,Egulf16380-RA,Eaffi11588-RA,Eaff03298-RA,Egulf14385-RA,Eaff14096-RA,Egulf09851-RA,Egulf00337-RA,Eaff14652-RA,Eaffi18282-RA,Eaff08044-RA,Eaff15894-RA,Eaffi18404-RA,Eaff06488-RA,Eaff03578-RA,Eaffi11713-RA,Egulf02246-RA,Eaffi09173-RA,Egulf09597-RA,Egulf03082-RA,
Molecular function	acetylcholine receptor activity	GO:0015464	6	0.000161129	2.50863	15	27	2671	12061	Egulf18192-RA,Egulf19242-RA,Eaff10566-RA,Egulf18239-RA,Eaff09795-RA,Eaff09544-RA,Eaff10560-RA,Eaff09600-RA,Eaffi05420-RA,Egulf11416-RA,Egulf18432-RA,Eaffi19495-RA,Eaff09545-RA,Egulf19250-RA,Egulf11417-RA,
Molecular function	calcium, potassium:sodium antiporter activity	GO:0008273	10	0.000166876	3.61243	8	10	2671	12061	Eaff10561-RA,Eaffi06805-RA,Egulf19178-RA,Eaffi06909-RA,Eaff10492-RA,Eaffi06809-RA,Egulf19246-RA,Egulf19177-RA,
Molecular function	superoxide dismutase copper chaperone activity	GO:0016532	5	0.000166876	3.61243	8	10	2671	12061	Eaffi13587-RA,Eaffi08816-RA,Egulf11522-RA,Eaffi01858-RA,Egulf00628-RA,Eaff05116-RA,Eaff08335-RA,Egulf07865-RA,
Molecular function	oxidoreductase activity, acting on superoxide radicals as acceptor	GO:0016721	4	0.000166876	3.61243	8	10	2671	12061	Eaffi18568-RA,Egulf14212-RA,Eaff15931-RA,Eaff16004-RA,Egulf14131-RA,Eaffi18659-RA,Eaff07138-RA,Eaff03400-RA,
Molecular function	superoxide dismutase activity	GO:0004784	5	0.000166876	3.61243	8	10	2671	12061	Eaffi18568-RA,Egulf14212-RA,Eaff15931-RA,Eaff16004-RA,Egulf14131-RA,Eaffi18659-RA,Eaff07138-RA,Eaff03400-RA,
Molecular function	virion binding	GO:0046790	3	0.000167545	3.9511	7	8	2671	12061	Eaffi13098-RA,Eaffi20142-RA,Eaff04730-RA,Egulf16103-RA,Egulf11090-RA,Egulf11089-RA,Eaffi13099-RA,
Molecular function	histone H4R3 methyltransferase activity	GO:0044020	10	0.000167545	3.9511	7	8	2671	12061	Eaffi16694-RA,Eaff17367-RA,Eaff02506-RA,Eaff15853-RA,Egulf14413-RA,Egulf07925-RA,Egulf12247-RA,
Molecular function	amine transmembrane transporter activity	GO:0005275	4	0.000198431	2.92182	11	17	2671	12061	Eaffi15139-RA,Eaff16832-RA,Egulf09059-RA,Eaff02834-RA,Eaff02837-RA,Eaff09004-RA,Egulf06816-RA,Egulf09064-RA,Egulf12940-RA,Egulf14331-RA,Eaff15683-RA,
Molecular function	pre-mRNA 3'-splice site binding	GO:0030628	7	0.000198431	2.92182	11	17	2671	12061	Egulf07306-RA,Eaff15146-RA,Eaffi01285-RA,Egulf13675-RA,Egulf04607-RA,Egulf17630-RA,Eaffi19110-RA,Eaffi03706-RA,Egulf20656-RA,Eaff01160-RA,Eaff16344-RA,
Molecular function	superoxide-generating NAD(P)H oxidase activity	GO:0016175	6	0.000198431	2.92182	11	17	2671	12061	Egulf18921-RA,Egulf05955-RA,Egulf06586-RA,Eaff00543-RA,Eaff08702-RA,Eaffi05271-RA,Eaffi23723-RA,Eaff10237-RA,Eaff11096-RA,Eaffi06469-RA,Egulf01029-RA,
Molecular function	cytoskeletal anchor activity	GO:0008093	4	0.000198431	2.92182	11	17	2671	12061	Egulf19416-RA,Eaff06883-RA,Egulf18979-RA,Eaff17325-RA,Eaff06884-RA,Egulf20546-RA,Eaff18793-RA,Egulf16112-RA,Eaffi20353-RA,Eaff10291-RA,Egulf12320-RA,
Molecular function	cytokine receptor binding	GO:0005126	5	0.000221252	1.6387	45	124	2671	12061	Egulf20802-RA,Eaff05827-RA,Eaff11639-RA,Eaffi21782-RA,Eaff14179-RA,Eaff02518-RA,Eaffi09259-RA,Eaff06883-RA,Egulf22016-RA,Egulf12869-RA,Egulf08895-RA,Eaff13951-RA,Eaffi14602-RA,Eaffi20926-RA,Egulf02156-RA,Egulf18979-RA,Egulf04030-RA,Eaffi23474-RA,Egulf08691-RA,Eaff06884-RA,Eaffi21784-RA,Egulf20546-RA,Eaff05706-RA,Eaff02009-RA,Eaff16897-RA,Eaff15445-RA,Eaff05705-RA,Eaffi03585-RA,Egulf05346-RA,Egulf…
Molecular function	solute:sodium symporter activity	GO:0015370	8	0.00027626	1.72935	36	94	2671	12061	Eaff17478-RA,Eaff04677-RA,Egulf06466-RA,Egulf02095-RA,Egulf20268-RA,Eaff00425-RA,Egulf16610-RA,Eaff10850-RA,Eaffi02118-RA,Egulf11029-RA,Eaffi01162-RA,Eaff01053-RA,Eaff19211-RA,Eaff18430-RA,Egulf21912-RA,Eaff04678-RA,Eaff16892-RA,Eaff14243-RA,Eaffi16123-RA,Egulf06816-RA,Egulf12881-RA,Eaffi17242-RA,Egulf07189-RA,Egulf07190-RA,Eaff07294-RA,Egulf12111-RA,Eaff05886-RA,Egulf20267-RA,Eaff00740-RA,Eaffi0…
Molecular function	NAD binding	GO:0051287	8	0.000299201	1.84437	29	71	2671	12061	Eaffi16723-RA,Eaffi16338-RA,Egulf13025-RA,Eaff04278-RA,Eaffi09244-RA,Eaff04696-RA,Eaff09647-RA,Eaffi04844-RA,Egulf18280-RA,Eaffi02937-RA,Egulf10578-RA,Eaff15956-RA,Eaff14417-RA,Eaff12524-RA,Egulf12435-RA,Eaffi03951-RA,Egulf03884-RA,Eaff17248-RA,Eaffi03377-RA,Egulf04258-RA,Eaff12074-RA,Egulf00278-RA,Egulf01912-RA,Eaffi11958-RA,Eaff07989-RA,Eaff07990-RA,Egulf04795-RA,Egulf14185-RA,Eaff19641-RA,
Molecular function	cysteine-type endopeptidase inhibitor activity involved in apoptotic process	GO:0043027	8	0.000304737	2.3306	16	31	2671	12061	Egulf01045-RA,Eaff08717-RA,Egulf01052-RA,Egulf01049-RA,Eaff08711-RA,Eaff08716-RA,Egulf01041-RA,Eaff08713-RA,Eaffi08374-RA,Egulf01047-RA,Eaffi08383-RA,Egulf01051-RA,Eaff08715-RA,Eaffi08376-RA,Eaff08718-RA,Eaffi08380-RA,
Molecular function	purine nucleotide binding	GO:0017076	6	0.000321465	1.2008	263	989	2671	12061	Egulf20802-RA,Eaff12123-RA,Eaff07460-RA,Egulf06159-RA,Eaffi18953-RA,Eaff07804-RA,Eaff14623-RA,Egulf01364-RA,Eaff17998-RA,Eaffi16723-RA,Egulf18921-RA,Eaff16419-RA,Egulf22140-RA,Egulf21488-RA,Eaffi16338-RA,Eaff07714-RA,Egulf21938-RA,Eaffi16810-RA,Egulf11514-RA,Egulf19787-RA,Eaffi11711-RA,Egulf20135-RA,Egulf05955-RA,Egulf21587-RA,Eaffi15323-RA,Egulf00279-RA,Eaffi08671-RA,Eaffi13587-RA,Eaff08383-RA,E…
Molecular function	tetrapyrrole binding	GO:0046906	4	0.000345935	1.87568	27	65	2671	12061	Egulf18921-RA,Egulf05955-RA,Eaff04505-RA,Egulf06586-RA,Eaff02181-RA,Eaff00543-RA,Eaff08702-RA,Egulf08518-RA,Egulf17270-RA,Eaffi05271-RA,Eaffi14691-RA,Eaff02605-RA,Eaffi12800-RA,Egulf08807-RA,Egulf17791-RA,Eaffi23723-RA,Egulf15930-RA,Eaff10237-RA,Egulf10821-RA,Eaff02180-RA,Eaff15438-RA,Eaff11096-RA,Eaff06970-RA,Eaffi06469-RA,Egulf01029-RA,Eaff18673-RA,Egulf08519-RA,
Molecular function	acetylcholine binding	GO:0042166	5	0.000353669	2.55226	13	23	2671	12061	Egulf18192-RA,Egulf19242-RA,Eaff10566-RA,Egulf18239-RA,Eaff09795-RA,Eaff09544-RA,Eaff10560-RA,Eaff09600-RA,Eaffi05420-RA,Egulf18432-RA,Eaffi19495-RA,Eaff09545-RA,Egulf19250-RA,
Molecular function	RNA polymerase II core promoter sequence-specific DNA binding	GO:0000979	10	0.000370097	1.89361	26	62	2671	12061	Egulf01045-RA,Eaffi18129-RA,Eaff08717-RA,Egulf01052-RA,Egulf04883-RA,Egulf09394-RA,Egulf01049-RA,Eaff08711-RA,Eaff08716-RA,Eaffi18131-RA,Eaff12016-RA,Egulf01041-RA,Eaff08713-RA,Eaffi08374-RA,Egulf14479-RA,Eaffi04050-RA,Eaff15788-RA,Egulf01047-RA,Eaff03108-RA,Eaffi08383-RA,Eaff18627-RA,Egulf01051-RA,Eaff08715-RA,Eaffi08376-RA,Eaff08718-RA,Eaffi08380-RA,
Molecular function	polyol transmembrane transporter activity	GO:0015166	5	0.000374936	3.12614	9	13	2671	12061	Eaff04677-RA,Egulf00886-RA,Egulf11029-RA,Egulf17477-RA,Eaff18578-RA,Eaff18430-RA,Eaff04678-RA,Egulf15238-RA,Eaff11355-RA,
Molecular function	oxidoreductase activity, acting on the aldehyde or oxo group of donors, NAD or NADP as acceptor	GO:0016620	5	0.000394349	1.91336	25	59	2671	12061	Eaff11931-RA,Egulf16461-RA,Eaff19100-RA,Egulf13034-RA,Eaffi09244-RA,Eaff09647-RA,Egulf14013-RA,Egulf18280-RA,Egulf04992-RA,Egulf07549-RA,Eaff02759-RA,Eaff02760-RA,Eaff12524-RA,Eaffi16715-RA,Eaffi04162-RA,Eaffi03377-RA,Eaff16103-RA,Egulf04258-RA,Egulf00278-RA,Eaff07989-RA,Eaff07990-RA,Eaff16785-RA,Eaff01374-RA,Eaffi21264-RA,Egulf08969-RA,
Molecular function	ATP-dependent activity	GO:0140657	2	0.000406663	1.20853	239	893	2671	12061	Eaffi04572-RA,Egulf18131-RA,Eaffi15139-RA,Eaffi18953-RA,Egulf01364-RA,Eaff14062-RA,Eaff17998-RA,Egulf05583-RA,Eaff09690-RA,Eaffi00389-RA,Eaffi19653-RA,Eaff16419-RA,Eaffi12832-RA,Eaff13293-RA,Egulf21488-RA,Egulf07727-RA,Egulf10541-RA,Eaffi12946-RA,Eaff02890-RA,Egulf21938-RA,Eaff12097-RA,Eaffi23121-RA,Eaffi04334-RA,Eaffi16011-RA,Egulf11514-RA,Eaff16832-RA,Eaffi19542-RA,Egulf02290-RA,Egulf00432-RA,E…
Molecular function	cAMP binding	GO:0030552	9	0.000408148	2.75949	11	18	2671	12061	Eaffi08650-RA,Eaffi08649-RA,Eaffi03193-RA,Eaff08474-RA,Egulf00774-RA,Egulf00777-RA,Eaff12657-RA,Eaff15790-RA,Egulf04103-RA,Eaff08475-RA,Egulf14477-RA,
Molecular function	mRNA 3'-UTR binding	GO:0003730	7	0.000415172	1.52365	55	163	2671	12061	Eaff16264-RA,Egulf18552-RA,Eaffi14436-RA,Eaffi16011-RA,Egulf22344-RA,Eaff19614-RA,Eaff13403-RA,Egulf15955-RA,Eaff17411-RA,Eaffi06050-RA,Eaff12358-RA,Eaffi02155-RA,Egulf17545-RA,Egulf13366-RA,Egulf06558-RA,Egulf02838-RA,Eaffi00536-RA,Eaffi19879-RA,Egulf15956-RA,Eaff12060-RA,Egulf17257-RA,Eaff17428-RA,Eaff13524-RA,Egulf12171-RA,Eaffi08302-RA,Eaff15509-RA,Eaffi02095-RA,Egulf18551-RA,Eaff19413-RA,Egu…
Molecular function	L-amino acid transmembrane transporter activity	GO:0015179	7	0.000418225	1.93523	24	56	2671	12061	Eaff15515-RA,Egulf06466-RA,Egulf02095-RA,Egulf20268-RA,Eaff00425-RA,Eaffi02118-RA,Egulf16671-RA,Eaff19261-RA,Eaffi01162-RA,Eaff01053-RA,Eaff19211-RA,Egulf21912-RA,Eaff14243-RA,Eaff12179-RA,Egulf07189-RA,Egulf07190-RA,Eaff07294-RA,Egulf17160-RA,Egulf20267-RA,Eaff00740-RA,Eaffi00430-RA,Egulf04690-RA,Egulf15113-RA,Egulf19575-RA,
Molecular function	dopamine receptor binding	GO:0050780	6	0.000462304	1.98684	22	50	2671	12061	Egulf21938-RA,Egulf18406-RA,Eaffi05864-RA,Eaff19987-RA,Egulf07745-RA,Eaffi07240-RA,Egulf14376-RA,Eaffi18038-RA,Egulf18400-RA,Eaff09762-RA,Eaffi18400-RA,Egulf04479-RA,Eaff12348-RA,Eaff05782-RA,Eaff01559-RA,Egulf09502-RA,Eaff09765-RA,Egulf18404-RA,Egulf19507-RA,Eaffi23876-RA,Eaffi01721-RA,Eaff02873-RA,
Molecular function	glycosaminoglycan binding	GO:0005539	4	0.000490058	1.6994	35	93	2671	12061	Eaff10707-RA,Eaff10441-RA,Eaff03977-RA,Egulf04927-RA,Egulf05810-RA,Egulf15225-RA,Eaff11236-RA,Egulf19131-RA,Egulf16277-RA,Egulf08473-RA,Eaff17586-RA,Eaff11986-RA,Eaffi04079-RA,Eaff19409-RA,Eaffi05099-RA,Egulf19792-RA,Egulf04928-RA,Eaffi10352-RA,Eaff11984-RA,Egulf14907-RA,Egulf13814-RA,Eaff10708-RA,Eaffi19020-RA,Egulf20876-RA,Eaff18958-RA,Eaff03976-RA,Egulf10293-RA,Eaff16245-RA,Eaff03778-RA,Eaff18…
Molecular function	aminoacyltransferase activity	GO:0016755	5	0.000492441	3.28403	8	11	2671	12061	Eaffi03135-RA,Egulf16380-RA,Egulf07265-RA,Egulf02566-RA,Egulf08080-RA,Eaff13788-RA,Egulf04043-RA,Eaff12714-RA,
Molecular function	myosin VI binding	GO:0070853	6	0.000492441	3.28403	8	11	2671	12061	Eaffi18953-RA,Eaffi08671-RA,Eaff15663-RA,Egulf14314-RA,Eaffi08670-RA,Eaff08446-RA,Eaffi18954-RA,Egulf00743-RA,
Molecular function	minus-end directed microfilament motor activity	GO:0060001	4	0.000492441	3.28403	8	11	2671	12061	Eaffi18953-RA,Eaffi08671-RA,Eaff15663-RA,Egulf14314-RA,Eaffi08670-RA,Eaff08446-RA,Eaffi18954-RA,Egulf00743-RA,
Molecular function	molecular function inhibitor activity	GO:0140678	3	0.000530558	1.27632	145	513	2671	12061	Egulf01045-RA,Egulf12619-RA,Eaff11931-RA,Egulf13360-RA,Egulf07740-RA,Eaffi06179-RA,Eaffi06041-RA,Egulf01414-RA,Eaff01084-RA,Eaff06515-RA,Eaff09911-RA,Eaffi13736-RA,Eaff19058-RA,Eaff09039-RA,Eaff16598-RA,Eaff12475-RA,Eaff03977-RA,Egulf18134-RA,Egulf21098-RA,Egulf18545-RA,Egulf05615-RA,Eaff08717-RA,Egulf03699-RA,Eaff16655-RA,Eaffi05740-RA,Egulf01052-RA,Egulf16403-RA,Egulf13034-RA,Eaffi13559-RA,Egul…
Molecular function	6,7-dihydropteridine reductase activity	GO:0004155	6	0.000531112	4.51554	5	5	2671	12061	Eaff04278-RA,Eaffi02937-RA,Egulf10578-RA,Egulf03884-RA,Eaff19641-RA,
Molecular function	succinyl-CoA:3-oxo-acid CoA-transferase activity	GO:0008260	6	0.000531112	4.51554	5	5	2671	12061	Eaff18302-RA,Eaff11371-RA,Egulf15732-RA,Eaffi04980-RA,Egulf05675-RA,
Molecular function	protein-N-terminal asparagine amidohydrolase activity	GO:0008418	6	0.000531112	4.51554	5	5	2671	12061	Eaffi09651-RA,Eaff18376-RA,Egulf15337-RA,Eaffi09657-RA,Eaff18372-RA,
Molecular function	glutamate dehydrogenase (NAD+) activity	GO:0004352	7	0.000531112	4.51554	5	5	2671	12061	Eaff15956-RA,Eaff14417-RA,Egulf01912-RA,Eaffi11958-RA,Egulf14185-RA,
Molecular function	glutamate dehydrogenase [NAD(P)+] activity	GO:0004353	6	0.000531112	4.51554	5	5	2671	12061	Eaff15956-RA,Eaff14417-RA,Egulf01912-RA,Eaffi11958-RA,Egulf14185-RA,
Molecular function	purine nucleosidase activity	GO:0008477	6	0.000531112	4.51554	5	5	2671	12061	Egulf06872-RA,Eaff00784-RA,Eaffi00825-RA,Eaff00785-RA,Egulf06871-RA,
Molecular function	leukotriene-A4 hydrolase activity	GO:0004463	6	0.000531112	4.51554	5	5	2671	12061	Egulf21235-RA,Egulf21234-RA,Eaff06424-RA,Egulf21233-RA,Eaff06423-RA,
Molecular function	malate dehydrogenase (decarboxylating) (NAD+) activity	GO:0004471	7	0.000531112	4.51554	5	5	2671	12061	Eaffi16723-RA,Eaffi16338-RA,Egulf13025-RA,Egulf12435-RA,Eaff17248-RA,
Molecular function	malate dehydrogenase (decarboxylating) (NADP+) activity	GO:0004473	7	0.000531112	4.51554	5	5	2671	12061	Eaffi16723-RA,Eaffi16338-RA,Egulf13025-RA,Egulf12435-RA,Eaff17248-RA,
Molecular function	methionine adenosyltransferase activity	GO:0004478	5	0.000531112	4.51554	5	5	2671	12061	Eaff07804-RA,Egulf00032-RA,Eaff00672-RA,Eaffi00679-RA,Egulf06741-RA,
Molecular function	diphosphotransferase activity	GO:0016778	5	0.000531112	4.51554	5	5	2671	12061	Eaff07714-RA,Egulf19787-RA,Eaffi04384-RA,Egulf05176-RA,Eaff11752-RA,
Molecular function	nicotinate phosphoribosyltransferase activity	GO:0004516	5	0.000531112	4.51554	5	5	2671	12061	Egulf05676-RA,Eaffi04984-RA,Eaff11904-RA,Eaff19834-RA,Egulf05017-RA,
Molecular function	proline dehydrogenase activity	GO:0004657	6	0.000531112	4.51554	5	5	2671	12061	Egulf21604-RA,Eaff12976-RA,Egulf21605-RA,Eaff06086-RA,Egulf03723-RA,
Molecular function	acetaldehyde dehydrogenase (acetylating) activity	GO:0008774	6	0.000531112	4.51554	5	5	2671	12061	Eaff09647-RA,Egulf18280-RA,Eaff12524-RA,Eaffi03377-RA,Egulf04258-RA,
Molecular function	protein-L-isoaspartate (D-aspartate) O-methyltransferase activity	GO:0004719	9	0.000531112	4.51554	5	5	2671	12061	Eaff18086-RA,Eaffi18772-RA,Egulf14009-RA,Eaff20250-RA,Egulf15862-RA,
Molecular function	ribose phosphate diphosphokinase activity	GO:0004749	6	0.000531112	4.51554	5	5	2671	12061	Eaff07714-RA,Egulf19787-RA,Eaffi04384-RA,Egulf05176-RA,Eaff11752-RA,
Molecular function	monocarboxylate:sodium symporter activity	GO:0140161	10	0.000531112	4.51554	5	5	2671	12061	Egulf16610-RA,Eaff10850-RA,Eaff18036-RA,Egulf21655-RA,Eaff06001-RA,
Molecular function	epidermal growth factor receptor activity	GO:0005006	9	0.000531112	4.51554	5	5	2671	12061	Eaff06642-RA,Eaffi14283-RA,Egulf20978-RA,Eaff06644-RA,Eaff06643-RA,
Molecular function	ryanodine-sensitive calcium-release channel activity	GO:0005219	12	0.000531112	4.51554	5	5	2671	12061	Eaff20005-RA,Egulf05093-RA,Eaff11833-RA,Eaffi04288-RA,Eaffi04286-RA,
Molecular function	intracellular cGMP-activated cation channel activity	GO:0005223	11	0.000531112	4.51554	5	5	2671	12061	Eaffi16810-RA,Eaff18470-RA,Egulf19665-RA,Eaffi03605-RA,Egulf14548-RA,
Molecular function	calcium ion binding involved in regulation of cytosolic calcium ion concentration	GO:0099510	7	0.000531112	4.51554	5	5	2671	12061	Eaffi09126-RA,Eaff08079-RA,Eaff08081-RA,Egulf00376-RA,Egulf00373-RA,
Molecular function	calcium ion binding involved in regulation of presynaptic cytosolic calcium ion concentration	GO:0099534	8	0.000531112	4.51554	5	5	2671	12061	Eaffi09126-RA,Eaff08079-RA,Eaff08081-RA,Egulf00376-RA,Egulf00373-RA,
Molecular function	gamma-aminobutyric acid:sodium:chloride symporter activity	GO:0005332	11	0.000531112	4.51554	5	5	2671	12061	Egulf16610-RA,Eaff10850-RA,Eaff18036-RA,Egulf21655-RA,Eaff06001-RA,
Molecular function	calcium ion binding involved in regulation of postsynaptic cytosolic calcium ion concentration	GO:0099567	8	0.000531112	4.51554	5	5	2671	12061	Eaffi09126-RA,Eaff08079-RA,Eaff08081-RA,Egulf00376-RA,Egulf00373-RA,
Molecular function	neuregulin receptor activity	GO:0038131	5	0.000531112	4.51554	5	5	2671	12061	Eaff06642-RA,Eaffi14283-RA,Egulf20978-RA,Eaff06644-RA,Eaff06643-RA,
Molecular function	neuregulin binding	GO:0038132	5	0.000531112	4.51554	5	5	2671	12061	Eaff06642-RA,Eaffi14283-RA,Egulf20978-RA,Eaff06644-RA,Eaff06643-RA,
Molecular function	myo-inositol:proton symporter activity	GO:0005366	9	0.000531112	4.51554	5	5	2671	12061	Egulf00886-RA,Egulf17477-RA,Eaff18578-RA,Egulf15238-RA,Eaff11355-RA,
Molecular function	glyceryl-ether monooxygenase activity	GO:0050479	6	0.000531112	4.51554	5	5	2671	12061	Eaff18346-RA,Eaffi16406-RA,Eaff17185-RA,Egulf12510-RA,Egulf15301-RA,
Molecular function	ISG15 transferase activity	GO:0042296	5	0.000531112	4.51554	5	5	2671	12061	Eaffi09120-RA,Eaff08084-RA,Egulf00380-RA,Eaff11348-RA,Egulf17485-RA,
Molecular function	beta-1,4-mannosylglycolipid beta-1,3-N-acetylglucosaminyltransferase activity	GO:0046981	7	0.000531112	4.51554	5	5	2671	12061	Eaff03354-RA,Eaff19959-RA,Egulf09650-RA,Egulf12196-RA,Eaff19444-RA,
Molecular function	obsolete transforming growth factor beta receptor, common-partner cytoplasmic mediator activity	GO:0030616	0	0.000531112	4.51554	5	5	2671	12061	Eaff01580-RA,Eaffi17950-RA,Eaff01581-RA,Egulf07766-RA,Eaffi01745-RA,
Molecular function	1-alkylglycerophosphocholine O-acetyltransferase activity	GO:0047192	8	0.000531112	4.51554	5	5	2671	12061	Egulf04047-RA,Eaff12710-RA,Eaff16185-RA,Eaffi03142-RA,Egulf13897-RA,
Molecular function	serum response element binding	GO:0010736	11	0.000531112	4.51554	5	5	2671	12061	Eaff02589-RA,Eaff12568-RA,Egulf08801-RA,Eaffi03325-RA,Egulf04212-RA,
Molecular function	peptidyl-cysteine S-nitrosylase activity	GO:0035605	5	0.000531112	4.51554	5	5	2671	12061	Eaff11931-RA,Egulf13034-RA,Egulf04992-RA,Eaffi16715-RA,Eaff16785-RA,
Molecular function	suramin binding	GO:0043924	5	0.000531112	4.51554	5	5	2671	12061	Eaff20005-RA,Egulf05093-RA,Eaff11833-RA,Eaffi04288-RA,Eaffi04286-RA,
Molecular function	aspartic-type endopeptidase inhibitor activity	GO:0019828	7	0.000531112	4.51554	5	5	2671	12061	Eaff11931-RA,Egulf13034-RA,Egulf04992-RA,Eaffi16715-RA,Eaff16785-RA,
Molecular function	purine-rich negative regulatory element binding	GO:0032422	9	0.000531112	4.51554	5	5	2671	12061	Eaff13393-RA,Eaffi02108-RA,Egulf03243-RA,Egulf17964-RA,Eaff14990-RA,
Molecular function	adenosine kinase activity	GO:0004001	8	0.000531112	4.51554	5	5	2671	12061	Egulf01181-RA,Egulf12871-RA,Eaffi08259-RA,Eaff16899-RA,Eaff08824-RA,
Molecular function	1-phosphatidylinositol-5-phosphate 4-kinase activity	GO:0016309	7	0.000531112	4.51554	5	5	2671	12061	Egulf11560-RA,Eaff05143-RA,Eaff03650-RA,Eaffi17484-RA,Eaffi13620-RA,
Molecular function	sphinganine-1-phosphate aldolase activity	GO:0008117	6	0.000531112	4.51554	5	5	2671	12061	Eaff10861-RA,Eaffi14119-RA,Egulf19567-RA,Egulf21094-RA,Eaff06516-RA,
Molecular function	aminomethyltransferase activity	GO:0004047	6	0.000531112	4.51554	5	5	2671	12061	Egulf05101-RA,Eaff11796-RA,Eaffi04301-RA,Eaff11797-RA,Egulf05102-RA,
Molecular function	arginyltransferase activity	GO:0004057	6	0.000531112	4.51554	5	5	2671	12061	Eaffi03135-RA,Egulf02566-RA,Eaff13788-RA,Egulf04043-RA,Eaff12714-RA,
Molecular function	diacylglycerol binding	GO:0019992	4	0.000589279	2.82221	10	16	2671	12061	Egulf18372-RA,Eaff09736-RA,Egulf18370-RA,Eaffi05822-RA,Eaffi03193-RA,Egulf18371-RA,Eaff12657-RA,Eaff15790-RA,Egulf04103-RA,Egulf14477-RA,
Molecular function	O-acetyltransferase activity	GO:0016413	7	0.000608699	3.51208	7	9	2671	12061	Egulf04047-RA,Eaff12710-RA,Egulf05476-RA,Eaff16185-RA,Eaffi03142-RA,Egulf13897-RA,Eaff11523-RA,
Molecular function	UDP-galactose:beta-N-acetylglucosamine beta-1,3-galactosyltransferase activity	GO:0008499	8	0.000608699	3.51208	7	9	2671	12061	Eaff03354-RA,Eaff19959-RA,Egulf09650-RA,Egulf02378-RA,Egulf12196-RA,Eaff19444-RA,Egulf05421-RA,
Molecular function	histone H3K9 methyltransferase activity	GO:0046974	10	0.000608699	3.51208	7	9	2671	12061	Eaffi18129-RA,Eaffi13385-RA,Egulf09394-RA,Eaffi18131-RA,Egulf20305-RA,Eaff03108-RA,Egulf11327-RA,
Molecular function	uracil binding	GO:0002058	6	0.000608699	3.51208	7	9	2671	12061	Egulf16866-RA,Egulf05810-RA,Eaff11236-RA,Egulf16277-RA,Eaff19409-RA,Eaffi05099-RA,Eaff18958-RA,
Molecular function	pyrimidine nucleobase binding	GO:0002061	5	0.000608699	3.51208	7	9	2671	12061	Egulf16866-RA,Egulf05810-RA,Eaff11236-RA,Egulf16277-RA,Eaff19409-RA,Eaffi05099-RA,Eaff18958-RA,
Molecular function	Roundabout binding	GO:0048495	5	0.000608699	3.51208	7	9	2671	12061	Eaff09079-RA,Eaff09080-RA,Eaffi07939-RA,Eaff03977-RA,Eaff03976-RA,Egulf10293-RA,Eaff03778-RA,
Molecular function	phosphatidylinositol bisphosphate kinase activity	GO:0052813	6	0.000615839	2.44592	13	24	2671	12061	Egulf05895-RA,Egulf14376-RA,Eaffi18400-RA,Egulf07821-RA,Eaff06642-RA,Eaff11164-RA,Eaffi14283-RA,Egulf20978-RA,Eaff06644-RA,Eaffi01808-RA,Eaff06643-RA,Eaff02873-RA,Eaff01630-RA,
Molecular function	prostaglandin-E synthase activity	GO:0050220	5	0.000666347	3.87046	6	7	2671	12061	Eaff04750-RA,Eaff13253-RA,Egulf11112-RA,Egulf01854-RA,Egulf03414-RA,Eaffi02313-RA,
Molecular function	nucleic acid transmembrane transporter activity	GO:0051032	5	0.000666347	3.87046	6	7	2671	12061	Eaffi16011-RA,Eaffi19879-RA,Eaff17428-RA,Eaff19413-RA,Egulf16871-RA,Eaffi00699-RA,
Molecular function	troponin I binding	GO:0031013	5	0.000666347	3.87046	6	7	2671	12061	Eaff17680-RA,Eaff16646-RA,Egulf13362-RA,Eaffi09979-RA,Eaffi15872-RA,Egulf13280-RA,
Molecular function	sequence-specific double-stranded DNA binding	GO:1990837	7	0.00073736	1.19587	241	910	2671	12061	Egulf01045-RA,Eaff01580-RA,Egulf01708-RA,Egulf02293-RA,Egulf13179-RA,Egulf18307-RA,Eaff11676-RA,Egulf09781-RA,Egulf15807-RA,Eaff19058-RA,Eaff02589-RA,Egulf18552-RA,Egulf05279-RA,Egulf19357-RA,Eaff12568-RA,Eaffi03884-RA,Eaff00651-RA,Eaff10964-RA,Eaffi17950-RA,Eaff11772-RA,Eaff19614-RA,Egulf01469-RA,Eaffi18129-RA,Eaffi21782-RA,Egulf01470-RA,Egulf18569-RA,Eaffi11384-RA,Eaff08717-RA,Eaff10663-RA,Eaff…
Molecular function	protein demethylase activity	GO:0140457	4	0.000749358	2.18935	16	33	2671	12061	Eaff11676-RA,Egulf05279-RA,Eaff09632-RA,Eaffi04491-RA,Eaff12159-RA,Egulf18267-RA,Eaffi05547-RA,Eaff09634-RA,Eaffi02965-RA,Egulf21900-RA,Eaffi04490-RA,Egulf05278-RA,Egulf05277-RA,Eaff05828-RA,Eaff12844-RA,Eaff11677-RA,
Molecular function	histone demethylase activity	GO:0032452	5	0.000749358	2.18935	16	33	2671	12061	Eaff11676-RA,Egulf05279-RA,Eaff09632-RA,Eaffi04491-RA,Eaff12159-RA,Egulf18267-RA,Eaffi05547-RA,Eaff09634-RA,Eaffi02965-RA,Egulf21900-RA,Eaffi04490-RA,Egulf05278-RA,Egulf05277-RA,Eaff05828-RA,Eaff12844-RA,Eaff11677-RA,
Molecular function	SMAD binding	GO:0046332	4	0.000764963	1.59601	41	116	2671	12061	Eaffi21345-RA,Egulf20802-RA,Eaff01580-RA,Eaffi17950-RA,Egulf05615-RA,Eaffi09259-RA,Eaff16196-RA,Eaff13951-RA,Eaffi20926-RA,Eaff13393-RA,Egulf08691-RA,Egulf13893-RA,Eaff10790-RA,Eaffi02108-RA,Eaffi13098-RA,Eaff01581-RA,Eaff02009-RA,Eaffi04912-RA,Egulf03243-RA,Eaffi03951-RA,Eaffi01958-RA,Eaff04730-RA,Eaff05712-RA,Egulf20016-RA,Eaff12074-RA,Eaff07515-RA,Egulf04345-RA,Egulf04795-RA,Eaff07111-RA,Eaff1…
Molecular function	obsolete protein N-terminus binding	GO:0047485	0	0.000772229	1.4227	69	219	2671	12061	Egulf09425-RA,Eaff14062-RA,Egulf18372-RA,Eaff02324-RA,Egulf02290-RA,Egulf02289-RA,Eaffi12190-RA,Eaff13349-RA,Eaff09736-RA,Eaff06883-RA,Eaffi06013-RA,Eaffi02909-RA,Eaffi02910-RA,Eaffi14602-RA,Eaffi18104-RA,Egulf10874-RA,Egulf14970-RA,Egulf18979-RA,Egulf20086-RA,Egulf02287-RA,Egulf18370-RA,Eaff12861-RA,Eaff06884-RA,Eaff15389-RA,Egulf17381-RA,Egulf08386-RA,Eaff09864-RA,Eaffi05822-RA,Eaff10921-RA,Egu…
Molecular function	hydrolase activity, acting on carbon-nitrogen (but not peptide) bonds, in cyclic amides	GO:0016812	5	0.000775788	2.61426	11	19	2671	12061	Egulf16866-RA,Eaff18959-RA,Egulf05810-RA,Eaff11236-RA,Egulf16277-RA,Eaff19409-RA,Eaffi05099-RA,Egulf10375-RA,Eaff18958-RA,Eaff04053-RA,Egulf10374-RA,
Molecular function	inorganic anion transmembrane transporter activity	GO:0015103	5	0.000829802	1.46383	59	182	2671	12061	Eaff07460-RA,Eaff10158-RA,Egulf07470-RA,Eaff13502-RA,Egulf10934-RA,Eaff16787-RA,Eaff01648-RA,Eaffi01328-RA,Egulf17829-RA,Eaff04968-RA,Egulf02145-RA,Eaff14897-RA,Egulf16610-RA,Egulf01899-RA,Eaff05741-RA,Eaffi13417-RA,Eaff10850-RA,Egulf10849-RA,Eaff04548-RA,Egulf02856-RA,Eaff14433-RA,Eaffi06391-RA,Egulf11685-RA,Eaff01292-RA,Egulf01248-RA,Eaff04595-RA,Eaffi22638-RA,Eaff05258-RA,Egulf20678-RA,Egulf12…
Molecular function	amino acid transmembrane transporter activity	GO:0015171	6	0.000832735	1.69997	32	85	2671	12061	Eaff15515-RA,Egulf06466-RA,Egulf02095-RA,Egulf20268-RA,Eaff00425-RA,Egulf16610-RA,Eaff10850-RA,Eaffi02118-RA,Egulf16671-RA,Eaff19261-RA,Eaffi01162-RA,Eaff01053-RA,Eaff19211-RA,Egulf21912-RA,Eaff14243-RA,Egulf06816-RA,Eaff12179-RA,Eaffi17242-RA,Egulf07189-RA,Egulf07190-RA,Eaff07294-RA,Egulf17160-RA,Egulf20267-RA,Eaff00740-RA,Eaff05809-RA,Eaffi00430-RA,Egulf04690-RA,Eaff18036-RA,Egulf21655-RA,Eaff0…
Molecular function	low voltage-gated calcium channel activity	GO:0008332	11	0.000843276	2.90285	9	14	2671	12061	Eaff11087-RA,Eaff15766-RA,Eaffi18296-RA,Eaffi05023-RA,Egulf05959-RA,Egulf08312-RA,Egulf14505-RA,Eaffi20721-RA,Egulf05728-RA,
Molecular function	oxidoreductase activity, acting on the aldehyde or oxo group of donors, oxygen as acceptor	GO:0016623	5	0.000843276	2.90285	9	14	2671	12061	Egulf16073-RA,Egulf16439-RA,Eaffi16531-RA,Eaff16871-RA,Egulf04950-RA,Eaffi20001-RA,Eaffi04109-RA,Eaff18826-RA,Eaff19084-RA,
Molecular function	histone H3K4 demethylase activity	GO:0032453	6	0.000843276	2.90285	9	14	2671	12061	Eaff09632-RA,Eaff12159-RA,Egulf18267-RA,Eaffi05547-RA,Eaff09634-RA,Eaffi02965-RA,Egulf21900-RA,Eaff05828-RA,Eaff12844-RA,
Molecular function	aldehyde oxidase activity	GO:0004031	6	0.000843276	2.90285	9	14	2671	12061	Egulf16073-RA,Egulf16439-RA,Eaffi16531-RA,Eaff16871-RA,Egulf04950-RA,Eaffi20001-RA,Eaffi04109-RA,Eaff18826-RA,Eaff19084-RA,
Molecular function	DNA-binding transcription factor activity, RNA polymerase II-specific	GO:0000981	4	0.000857665	1.2006	226	850	2671	12061	Egulf01045-RA,Eaff01580-RA,Egulf01708-RA,Egulf14723-RA,Egulf13179-RA,Egulf15705-RA,Egulf18307-RA,Eaffi10725-RA,Egulf09781-RA,Egulf15807-RA,Eaff02589-RA,Egulf19357-RA,Eaff12568-RA,Egulf22344-RA,Eaffi03884-RA,Eaff00651-RA,Eaff10964-RA,Eaffi17950-RA,Eaffi18129-RA,Eaffi21782-RA,Egulf18569-RA,Egulf05615-RA,Eaffi11384-RA,Eaff08717-RA,Eaff10663-RA,Eaffi23148-RA,Eaff02518-RA,Eaffi16673-RA,Egulf12268-RA,E…
Molecular function	lipid transporter activity	GO:0005319	3	0.000948915	1.60096	39	110	2671	12061	Eaff09690-RA,Eaff16419-RA,Eaffi19542-RA,Eaffi01694-RA,Eaff13187-RA,Eaff09367-RA,Egulf07721-RA,Eaffi21642-RA,Eaffi02589-RA,Eaff12436-RA,Eaff12110-RA,Egulf01764-RA,Eaff01792-RA,Egulf18312-RA,Eaffi00359-RA,Eaffi03497-RA,Eaff12985-RA,Egulf02670-RA,Egulf01765-RA,Egulf04379-RA,Egulf08159-RA,Egulf04769-RA,Eaff01542-RA,Egulf03636-RA,Egulf13577-RA,Eaffi07544-RA,Egulf19658-RA,Eaffi07422-RA,Egulf16688-RA,Ea…
Molecular function	double-stranded DNA binding	GO:0003690	6	0.000995559	1.17874	266	1019	2671	12061	Egulf01045-RA,Eaff01580-RA,Egulf01708-RA,Egulf02293-RA,Egulf14723-RA,Egulf13179-RA,Egulf15705-RA,Egulf18307-RA,Eaffi10725-RA,Eaff11676-RA,Egulf09781-RA,Egulf15807-RA,Eaff19058-RA,Egulf05137-RA,Eaff02589-RA,Egulf18552-RA,Egulf05279-RA,Egulf19357-RA,Eaff12568-RA,Egulf22344-RA,Eaffi03884-RA,Eaff00651-RA,Eaff10964-RA,Eaffi17950-RA,Eaff11772-RA,Eaff19614-RA,Egulf01469-RA,Eaffi18129-RA,Eaffi21782-RA,Eg…
Molecular function	purine ribonucleotide transmembrane transporter activity	GO:0005346	7	0.00102439	2.34808	13	25	2671	12061	Eaffi15139-RA,Eaff16832-RA,Egulf09059-RA,Egulf07538-RA,Eaff02834-RA,Eaff02837-RA,Eaffi01523-RA,Eaff09004-RA,Egulf09064-RA,Egulf12940-RA,Egulf14331-RA,Eaff15683-RA,Eaff01368-RA,
Molecular function	purine nucleotide transmembrane transporter activity	GO:0015216	6	0.00102439	2.34808	13	25	2671	12061	Eaffi15139-RA,Eaff16832-RA,Egulf09059-RA,Egulf07538-RA,Eaff02834-RA,Eaff02837-RA,Eaffi01523-RA,Eaff09004-RA,Egulf09064-RA,Egulf12940-RA,Egulf14331-RA,Eaff15683-RA,Eaff01368-RA,
Molecular function	neurotransmitter transmembrane transporter activity	GO:0005326	4	0.0010497	1.76695	27	69	2671	12061	Egulf06466-RA,Egulf02095-RA,Egulf20268-RA,Eaff00425-RA,Egulf16610-RA,Eaff10850-RA,Eaffi02118-RA,Eaffi01162-RA,Eaff01053-RA,Eaff19211-RA,Egulf21912-RA,Eaff16892-RA,Eaff14243-RA,Egulf06816-RA,Egulf12881-RA,Egulf07189-RA,Egulf07190-RA,Eaff07294-RA,Egulf20267-RA,Eaff00740-RA,Eaff05809-RA,Eaffi00430-RA,Eaff18036-RA,Egulf21655-RA,Eaff06001-RA,Egulf15113-RA,Egulf19575-RA,
Molecular function	purine ribonucleotide binding	GO:0032555	7	0.00111315	1.19153	233	883	2671	12061	Egulf20802-RA,Eaff12123-RA,Eaff07460-RA,Egulf06159-RA,Eaffi18953-RA,Eaff07804-RA,Eaff14623-RA,Egulf01364-RA,Eaff17998-RA,Eaffi16723-RA,Eaff16419-RA,Egulf22140-RA,Egulf21488-RA,Eaffi16338-RA,Eaff07714-RA,Egulf21938-RA,Eaffi16810-RA,Egulf11514-RA,Egulf19787-RA,Eaffi11711-RA,Egulf20135-RA,Egulf21587-RA,Eaffi15323-RA,Egulf00279-RA,Eaffi08671-RA,Eaffi13587-RA,Eaff08383-RA,Egulf18406-RA,Eaffi20651-RA,E…
Molecular function	cysteine-type endopeptidase inhibitor activity	GO:0004869	7	0.00112707	2.12496	16	34	2671	12061	Egulf01045-RA,Eaff08717-RA,Egulf01052-RA,Egulf01049-RA,Eaff08711-RA,Eaff08716-RA,Egulf01041-RA,Eaff08713-RA,Eaffi08374-RA,Egulf01047-RA,Eaffi08383-RA,Egulf01051-RA,Eaff08715-RA,Eaffi08376-RA,Eaff08718-RA,Eaffi08380-RA,
Molecular function	5'-nucleotidase activity	GO:0008253	8	0.00114763	2.6562	10	17	2671	12061	Egulf03455-RA,Eaffi02363-RA,Eaffi14731-RA,Egulf20689-RA,Eaff07023-RA,Eaff07665-RA,Eaff19807-RA,Eaff05204-RA,Egulf19858-RA,Eaffi15029-RA,
Molecular function	histone H3K36 demethylase activity	GO:0051864	6	0.00114763	2.6562	10	17	2671	12061	Eaff11676-RA,Egulf05279-RA,Eaffi04491-RA,Eaff12159-RA,Eaffi02965-RA,Eaffi04490-RA,Egulf05278-RA,Eaff05828-RA,Eaff12844-RA,Eaff11677-RA,
Molecular function	guanyl-nucleotide exchange factor activity	GO:0005085	6	0.00116962	1.38231	75	245	2671	12061	Egulf13360-RA,Egulf07740-RA,Eaffi06041-RA,Egulf01414-RA,Eaff01084-RA,Eaff09911-RA,Eaffi13736-RA,Eaff09039-RA,Eaff16598-RA,Egulf18134-RA,Egulf18545-RA,Eaffi05740-RA,Egulf08360-RA,Egulf12869-RA,Egulf22296-RA,Eaff07615-RA,Eaffi18325-RA,Eaffi21965-RA,Eaffi01915-RA,Eaffi15959-RA,Egulf22226-RA,Eaff20185-RA,Egulf08232-RA,Eaff06642-RA,Egulf20006-RA,Eaffi06080-RA,Eaffi03193-RA,Eaff09493-RA,Egulf20437-RA,E…
Molecular function	copper chaperone activity	GO:0016531	4	0.00118989	3.01036	8	12	2671	12061	Eaffi13587-RA,Eaffi08816-RA,Egulf11522-RA,Eaffi01858-RA,Egulf00628-RA,Eaff05116-RA,Eaff08335-RA,Egulf07865-RA,
Molecular function	gamma-catenin binding	GO:0045295	4	0.00118989	3.01036	8	12	2671	12061	Egulf04548-RA,Eaffi02733-RA,Eaffi03647-RA,Eaff12957-RA,Egulf15991-RA,Eaff18754-RA,Eaff12287-RA,Egulf11336-RA,
Molecular function	lipoprotein particle binding	GO:0071813	5	0.00118989	3.01036	8	12	2671	12061	Egulf03332-RA,Egulf05442-RA,Egulf16620-RA,Eaff01192-RA,Egulf11950-RA,Eaff13304-RA,Eaff11547-RA,Eaff17575-RA,
Molecular function	protein-lipid complex binding	GO:0071814	4	0.00118989	3.01036	8	12	2671	12061	Egulf03332-RA,Egulf05442-RA,Egulf16620-RA,Eaff01192-RA,Egulf11950-RA,Eaff13304-RA,Eaff11547-RA,Eaff17575-RA,
Molecular function	RNA polymerase II transcription regulatory region sequence-specific DNA binding	GO:0000977	9	0.00126303	1.2188	183	678	2671	12061	Egulf01045-RA,Eaff01580-RA,Egulf01708-RA,Egulf13179-RA,Egulf18307-RA,Eaff11676-RA,Egulf09781-RA,Eaff19058-RA,Eaff02589-RA,Egulf05279-RA,Egulf19357-RA,Eaff12568-RA,Eaffi03884-RA,Eaff00651-RA,Eaffi17950-RA,Eaff11772-RA,Eaffi18129-RA,Eaffi21782-RA,Eaffi11384-RA,Eaff08717-RA,Eaff10663-RA,Eaff02518-RA,Egulf12268-RA,Eaff09632-RA,Eaff10037-RA,Eaff02506-RA,Eaffi16267-RA,Eaff16196-RA,Eaffi04491-RA,Egulf01…
Molecular function	phospholipid transporter activity	GO:0005548	4	0.00148589	1.82206	23	57	2671	12061	Eaff09690-RA,Eaff16419-RA,Eaffi01694-RA,Eaff09367-RA,Egulf07721-RA,Eaff12436-RA,Eaff12110-RA,Egulf01764-RA,Eaff01792-RA,Egulf18312-RA,Eaffi00359-RA,Eaffi03497-RA,Egulf02670-RA,Egulf01765-RA,Egulf04379-RA,Egulf08159-RA,Egulf04769-RA,Eaff01542-RA,Eaffi07544-RA,Eaffi05757-RA,Egulf04378-RA,Eaffi07546-RA,Eaff18076-RA,
Molecular function	nucleoside diphosphate kinase activity	GO:0004550	7	0.00154058	2.35593	12	23	2671	12061	Egulf20135-RA,Eaffi15323-RA,Egulf00312-RA,Eaff07155-RA,Eaff07908-RA,Egulf15904-RA,Egulf20871-RA,Eaff18654-RA,Eaffi09203-RA,Egulf14277-RA,Eaffi14933-RA,Eaffi20533-RA,
Molecular function	endopeptidase inhibitor activity	GO:0004866	6	0.00161096	1.83966	22	54	2671	12061	Egulf01045-RA,Egulf12619-RA,Eaff11931-RA,Eaff08717-RA,Egulf01052-RA,Egulf13034-RA,Egulf04992-RA,Egulf01049-RA,Eaff08711-RA,Eaffi16715-RA,Eaff08716-RA,Egulf01041-RA,Eaff08713-RA,Eaffi08374-RA,Egulf01047-RA,Eaffi08383-RA,Egulf01051-RA,Eaff16785-RA,Eaff08715-RA,Eaffi08376-RA,Eaff08718-RA,Eaffi08380-RA,
Molecular function	3',5'-cyclic-AMP phosphodiesterase activity	GO:0004115	9	0.00163657	2.25777	13	26	2671	12061	Eaff11504-RA,Eaffi08650-RA,Eaffi08649-RA,Eaff07985-RA,Eaff11503-RA,Eaffi04814-RA,Eaff08474-RA,Egulf00774-RA,Egulf00777-RA,Egulf05514-RA,Eaffi04815-RA,Eaff08475-RA,Egulf00273-RA,
Molecular function	activin receptor activity	GO:0017002	9	0.00163962	3.16088	7	10	2671	12061	Egulf20802-RA,Eaffi20926-RA,Egulf08691-RA,Eaff02009-RA,Egulf20016-RA,Eaff07515-RA,Eaff07111-RA,
Molecular function	tyrosine-tRNA ligase activity	GO:0004831	7	0.00163962	3.16088	7	10	2671	12061	Eaff12123-RA,Eaffi03890-RA,Eaff12122-RA,Egulf04752-RA,Eaffi03891-RA,Egulf10772-RA,Eaff04459-RA,
Molecular function	GDP-dissociation inhibitor activity	GO:0005092	6	0.00207199	2.50863	10	18	2671	12061	Eaffi08714-RA,Eaff13671-RA,Egulf02687-RA,Egulf10345-RA,Eaff13673-RA,Egulf10131-RA,Egulf02688-RA,Egulf10130-RA,Eaff08419-RA,Eaff04028-RA,
Molecular function	oxidoreductase activity, acting on paired donors, with incorporation or reduction of molecular oxygen	GO:0016705	4	0.0021066	1.56145	37	107	2671	12061	Eaff18346-RA,Eaff11676-RA,Egulf05279-RA,Egulf16380-RA,Eaff02583-RA,Eaffi04491-RA,Eaff12159-RA,Eaffi16406-RA,Eaff03795-RA,Egulf17270-RA,Eaffi02965-RA,Eaffi08776-RA,Eaffi22535-RA,Egulf21900-RA,Eaffi21130-RA,Eaff17185-RA,Egulf10113-RA,Eaffi20239-RA,Eaffi04490-RA,Egulf17791-RA,Egulf12510-RA,Eaffi09879-RA,Egulf15301-RA,Eaffi04446-RA,Egulf05278-RA,Eaffi16074-RA,Egulf05237-RA,Eaff08366-RA,Eaffi17219-RA,…
Molecular function	glutamate-cysteine ligase activity	GO:0004357	6	0.00216275	3.38665	6	8	2671	12061	Eaffi14977-RA,Egulf19785-RA,Eaff07715-RA,Eaffi14979-RA,Eaffi14978-RA,Egulf19786-RA,
Molecular function	serine transmembrane transporter activity	GO:0022889	8	0.00216275	3.38665	6	8	2671	12061	Eaff15515-RA,Egulf16671-RA,Eaff19261-RA,Eaff12179-RA,Egulf17160-RA,Egulf04690-RA,
Molecular function	L-serine transmembrane transporter activity	GO:0015194	9	0.00216275	3.38665	6	8	2671	12061	Eaff15515-RA,Egulf16671-RA,Eaff19261-RA,Eaff12179-RA,Egulf17160-RA,Egulf04690-RA,
Molecular function	peptide-serine-alpha-N-acetyltransferase activity	GO:1990189	10	0.00216275	3.38665	6	8	2671	12061	Eaff16862-RA,Eaffi04549-RA,Egulf05324-RA,Egulf07013-RA,Egulf12918-RA,Eaff11658-RA,
Molecular function	deacetylase activity	GO:0019213	4	0.00224376	1.62769	31	86	2671	12061	Egulf16993-RA,Eaff19521-RA,Eaff09632-RA,Egulf18267-RA,Eaff13446-RA,Eaff15702-RA,Eaff19932-RA,Eaffi05547-RA,Eaff09634-RA,Eaffi18448-RA,Eaffi11369-RA,Eaff16547-RA,Eaffi08307-RA,Egulf14348-RA,Egulf02909-RA,Eaffi18449-RA,Eaff02058-RA,Egulf14260-RA,Egulf05542-RA,Eaff15698-RA,Egulf14349-RA,Egulf01139-RA,Eaffi04825-RA,Eaffi08439-RA,Egulf00993-RA,Eaff11480-RA,Eaff15607-RA,Egulf14347-RA,Eaff15701-RA,Egulf…
Molecular function	HMG box domain binding	GO:0071837	5	0.00226207	1.96831	17	39	2671	12061	Eaffi21782-RA,Eaff02518-RA,Egulf22016-RA,Eaffi21784-RA,Eaff10790-RA,Eaffi06238-RA,Eaff05706-RA,Eaff05705-RA,Eaffi06228-RA,Eaff05700-RA,Egulf22012-RA,Egulf18703-RA,Eaffi21408-RA,Egulf09238-RA,Egulf22019-RA,Eaff10015-RA,Eaff05711-RA,
Molecular function	phosphatidylinositol 3-kinase binding	GO:0043548	4	0.00231945	1.82358	21	52	2671	12061	Egulf21938-RA,Egulf18406-RA,Eaffi21837-RA,Eaffi05864-RA,Eaff19987-RA,Egulf07745-RA,Eaffi07240-RA,Eaffi18038-RA,Egulf18400-RA,Eaff09762-RA,Egulf04479-RA,Eaff12348-RA,Eaff05782-RA,Eaff13428-RA,Eaff01559-RA,Egulf09502-RA,Eaff09765-RA,Egulf18404-RA,Egulf19507-RA,Eaffi23876-RA,Eaffi01721-RA,
Molecular function	steroid hydroxylase activity	GO:0008395	5	0.00232268	2.36528	11	21	2671	12061	Eaff02583-RA,Eaff03795-RA,Eaffi22535-RA,Eaffi21130-RA,Egulf10113-RA,Eaffi20239-RA,Eaffi09879-RA,Eaffi16074-RA,Eaffi17219-RA,Eaff17445-RA,Eaffi11346-RA,
Molecular function	phosphatidylinositol 3-kinase activity	GO:0035004	6	0.00245988	2.05252	15	33	2671	12061	Egulf05895-RA,Egulf14376-RA,Eaffi18400-RA,Egulf07821-RA,Eaff06642-RA,Eaff11164-RA,Eaffi14283-RA,Egulf20978-RA,Eaff06644-RA,Eaffi01808-RA,Egulf12228-RA,Eaff06643-RA,Eaff17382-RA,Eaff02873-RA,Eaff01630-RA,
Molecular function	GABA receptor binding	GO:0050811	5	0.00246532	2.25777	12	24	2671	12061	Egulf07470-RA,Eaff01648-RA,Eaffi01328-RA,Eaff01292-RA,Egulf08232-RA,Egulf20678-RA,Egulf08234-RA,Egulf10533-RA,Eaff07012-RA,Egulf07844-RA,Egulf08233-RA,Eaff01687-RA,
Molecular function	protein-containing complex binding	GO:0044877	3	0.00247351	1.13532	353	1404	2671	12061	Eaffi21345-RA,Egulf20802-RA,Egulf21337-RA,Eaff01580-RA,Egulf13360-RA,Egulf18131-RA,Eaffi18953-RA,Eaff17998-RA,Eaff00623-RA,Eaffi19653-RA,Eaff11447-RA,Eaffi12832-RA,Eaff13293-RA,Egulf18372-RA,Egulf21488-RA,Egulf07727-RA,Eaffi12946-RA,Egulf11219-RA,Egulf11220-RA,Eaff11639-RA,Eaff19058-RA,Egulf22131-RA,Egulf20429-RA,Eaff02890-RA,Eaffi05569-RA,Eaffi17667-RA,Eaff09656-RA,Eaff10212-RA,Eaffi23121-RA,Egu…
Molecular function	peptide binding	GO:0042277	4	0.00248889	1.30638	92	318	2671	12061	Eaff07460-RA,Eaffi06179-RA,Eaff18894-RA,Egulf21235-RA,Eaff19173-RA,Eaff11639-RA,Eaff03216-RA,Egulf21938-RA,Egulf21587-RA,Egulf18406-RA,Eaff06101-RA,Egulf19943-RA,Eaffi05864-RA,Eaff19987-RA,Egulf07745-RA,Eaffi07240-RA,Eaffi23866-RA,Egulf18192-RA,Eaff16995-RA,Eaffi18038-RA,Egulf19242-RA,Eaffi16611-RA,Egulf18400-RA,Egulf16620-RA,Egulf01239-RA,Eaff10566-RA,Egulf04030-RA,Eaff09762-RA,Egulf18239-RA,Egu…
Molecular function	intracellular cyclic nucleotide activated monoatomic cation channel activity	GO:0005221	10	0.00249381	2.77879	8	13	2671	12061	Eaffi16810-RA,Egulf18099-RA,Eaff18470-RA,Egulf19665-RA,Eaffi05670-RA,Eaffi03605-RA,Egulf14548-RA,Egulf18100-RA,
Molecular function	cyclic nucleotide-gated monoatomic ion channel activity	GO:0043855	9	0.00249381	2.77879	8	13	2671	12061	Eaffi16810-RA,Egulf18099-RA,Eaff18470-RA,Egulf19665-RA,Eaffi05670-RA,Eaffi03605-RA,Egulf14548-RA,Egulf18100-RA,
Molecular function	ribonucleotide binding	GO:0032553	6	0.00250649	1.17424	233	896	2671	12061	Egulf20802-RA,Eaff12123-RA,Eaff07460-RA,Egulf06159-RA,Eaffi18953-RA,Eaff07804-RA,Eaff14623-RA,Egulf01364-RA,Eaff17998-RA,Eaffi16723-RA,Eaff16419-RA,Egulf22140-RA,Egulf21488-RA,Eaffi16338-RA,Eaff07714-RA,Egulf21938-RA,Eaffi16810-RA,Egulf11514-RA,Egulf19787-RA,Eaffi11711-RA,Egulf20135-RA,Egulf21587-RA,Eaffi15323-RA,Egulf00279-RA,Eaffi08671-RA,Eaffi13587-RA,Eaff08383-RA,Egulf18406-RA,Eaffi20651-RA,E…
Molecular function	obsolete coenzyme binding	GO:0050662	0	0.00254584	1.29202	99	346	2671	12061	Eaffi05771-RA,Eaffi16694-RA,Egulf05101-RA,Eaffi16723-RA,Egulf18921-RA,Eaffi16338-RA,Egulf06042-RA,Egulf16073-RA,Eaff12733-RA,Eaff17367-RA,Egulf05955-RA,Eaffi07931-RA,Egulf21604-RA,Egulf02644-RA,Eaff11796-RA,Eaff09632-RA,Egulf13025-RA,Egulf06586-RA,Egulf00416-RA,Egulf06038-RA,Egulf05413-RA,Eaff15853-RA,Eaffi04301-RA,Eaffi14977-RA,Eaff04278-RA,Eaffi09244-RA,Eaff04696-RA,Egulf16439-RA,Eaff09647-RA,E…
Molecular function	soluble NSF attachment protein activity	GO:0005483	4	0.00259944	3.76295	5	6	2671	12061	Eaff11410-RA,Egulf21063-RA,Eaff06551-RA,Eaffi04943-RA,Egulf05629-RA,
Molecular function	translation repressor activity	GO:0030371	3	0.00278772	1.77396	22	56	2671	12061	Eaff18587-RA,Eaff16264-RA,Eaff17411-RA,Egulf15213-RA,Eaffi09601-RA,Eaff13393-RA,Eaffi08302-RA,Egulf15211-RA,Eaffi02108-RA,Egulf13797-RA,Egulf03243-RA,Egulf12193-RA,Eaffi09602-RA,Eaff18588-RA,Eaff08790-RA,Eaffi08301-RA,Eaffi18746-RA,Eaff01623-RA,Egulf01142-RA,Egulf07811-RA,Egulf17964-RA,Eaff14990-RA,
Molecular function	peptidase inhibitor activity	GO:0030414	5	0.00278772	1.77396	22	56	2671	12061	Egulf01045-RA,Egulf12619-RA,Eaff11931-RA,Eaff08717-RA,Egulf01052-RA,Egulf13034-RA,Egulf04992-RA,Egulf01049-RA,Eaff08711-RA,Eaffi16715-RA,Eaff08716-RA,Egulf01041-RA,Eaff08713-RA,Eaffi08374-RA,Egulf01047-RA,Eaffi08383-RA,Egulf01051-RA,Eaff16785-RA,Eaff08715-RA,Eaffi08376-RA,Eaff08718-RA,Eaffi08380-RA,
Molecular function	palmitoyl-(protein) hydrolase activity	GO:0008474	6	0.00311572	2.53999	9	16	2671	12061	Egulf05051-RA,Egulf14898-RA,Eaff17877-RA,Eaff11875-RA,Egulf01894-RA,Egulf05049-RA,Eaffi04227-RA,Eaffi11977-RA,Eaff14435-RA,
Molecular function	palmitoyl hydrolase activity	GO:0098599	4	0.00311572	2.53999	9	16	2671	12061	Egulf05051-RA,Egulf14898-RA,Eaff17877-RA,Eaff11875-RA,Egulf01894-RA,Egulf05049-RA,Eaffi04227-RA,Eaffi11977-RA,Eaff14435-RA,
Molecular function	spectrin binding	GO:0030507	5	0.00313333	1.9191	17	40	2671	12061	Egulf18372-RA,Eaffi01410-RA,Eaff09736-RA,Egulf18370-RA,Eaff11178-RA,Eaffi05822-RA,Eaff10921-RA,Eaff11771-RA,Egulf05891-RA,Egulf19517-RA,Egulf18371-RA,Eaff10923-RA,Eaffi07254-RA,Egulf19516-RA,Eaff10922-RA,Egulf19519-RA,Egulf05163-RA,
Molecular function	transmembrane transporter binding	GO:0044325	4	0.00342419	1.50518	39	117	2671	12061	Eaffi21345-RA,Eaff06489-RA,Egulf09425-RA,Eaff02324-RA,Egulf13623-RA,Eaff20005-RA,Eaff13349-RA,Eaff19403-RA,Eaffi18104-RA,Egulf14970-RA,Egulf05093-RA,Egulf12753-RA,Egulf08386-RA,Eaff20185-RA,Egulf17769-RA,Eaff17003-RA,Egulf19251-RA,Eaff03131-RA,Egulf04523-RA,Egulf12751-RA,Eaff13428-RA,Eaff13756-RA,Eaffi22699-RA,Egulf20876-RA,Eaff11833-RA,Eaffi04288-RA,Eaffi09942-RA,Eaff17938-RA,Egulf16856-RA,Eaff1…
Molecular function	5'-3' DNA helicase activity	GO:0043139	7	0.00351222	2.3766	10	19	2671	12061	Eaff14062-RA,Egulf02290-RA,Egulf02289-RA,Eaffi12190-RA,Egulf02287-RA,Eaff14063-RA,Eaff05241-RA,Eaff14061-RA,Egulf11668-RA,Egulf02288-RA,
Molecular function	14-3-3 protein binding	GO:0071889	4	0.0036323	1.82543	19	47	2671	12061	Eaff06489-RA,Eaff10707-RA,Egulf13623-RA,Egulf15225-RA,Eaff08392-RA,Eaff16556-RA,Egulf02120-RA,Egulf03628-RA,Eaffi08745-RA,Egulf00678-RA,Eaff13059-RA,Eaff10708-RA,Egulf13395-RA,Eaff14622-RA,Eaffi11157-RA,Egulf03117-RA,Eaffi19379-RA,Eaffi19331-RA,Eaff18562-RA,
Molecular function	isomerase activity	GO:0016853	3	0.0036383	1.36769	63	208	2671	12061	Egulf20904-RA,Egulf21133-RA,Egulf01388-RA,Egulf01823-RA,Eaffi21005-RA,Eaffi14067-RA,Egulf16380-RA,Eaff01862-RA,Eaffi11588-RA,Eaff07939-RA,Eaff09408-RA,Egulf17256-RA,Eaff04750-RA,Egulf17037-RA,Egulf05413-RA,Eaff03298-RA,Eaffi20360-RA,Eaff06660-RA,Eaff13253-RA,Egulf11112-RA,Eaffi04095-RA,Egulf01854-RA,Eaffi14298-RA,Eaff06661-RA,Egulf20571-RA,Eaff07203-RA,Egulf14385-RA,Eaffi09339-RA,Egulf00228-RA,Eg…
Molecular function	G-rich strand telomeric DNA binding	GO:0098505	9	0.00364718	2.87352	7	11	2671	12061	Eaffi16011-RA,Egulf05132-RA,Eaffi19879-RA,Eaff17428-RA,Egulf12171-RA,Egulf12333-RA,Eaffi00699-RA,
Molecular function	insulin receptor substrate binding	GO:0043560	4	0.00364718	2.87352	7	11	2671	12061	Egulf05895-RA,Egulf14376-RA,Eaffi18400-RA,Egulf07821-RA,Eaffi01808-RA,Eaff02873-RA,Eaff01630-RA,
Molecular function	histone deacetylase binding	GO:0042826	5	0.00373533	1.4354	48	151	2671	12061	Egulf16993-RA,Eaff19521-RA,Egulf03251-RA,Eaff19058-RA,Eaff02589-RA,Eaff12568-RA,Eaff11772-RA,Eaff16589-RA,Egulf03182-RA,Eaffi23010-RA,Eaffi23148-RA,Egulf16403-RA,Egulf12427-RA,Eaff13446-RA,Eaff19932-RA,Egulf16402-RA,Eaffi11369-RA,Eaff10790-RA,Egulf08801-RA,Egulf05158-RA,Egulf13353-RA,Eaff20185-RA,Eaffi08307-RA,Eaffi02509-RA,Eaff13121-RA,Egulf02909-RA,Egulf03574-RA,Egulf05542-RA,Eaffi03951-RA,Egul…
Molecular function	protein kinase binding	GO:0019901	6	0.00411212	1.16031	240	934	2671	12061	Eaffi21345-RA,Eaff12249-RA,Eaff06489-RA,Eaff18703-RA,Eaff14226-RA,Eaffi06041-RA,Eaff17998-RA,Eaff01084-RA,Eaff19173-RA,Eaff19058-RA,Egulf21938-RA,Eaffi05569-RA,Eaffi17667-RA,Eaff09656-RA,Egulf07916-RA,Eaff17367-RA,Eaffi02279-RA,Eaffi11711-RA,Eaffi14578-RA,Egulf04651-RA,Egulf18134-RA,Eaff09599-RA,Egulf00537-RA,Eaffi02849-RA,Egulf18545-RA,Eaff14179-RA,Egulf13623-RA,Egulf05615-RA,Egulf18406-RA,Eaff2…
Molecular function	transferase activity, transferring alkyl or aryl (other than methyl) groups	GO:0016765	4	0.00420581	1.59696	29	82	2671	12061	Eaff07804-RA,Egulf20904-RA,Eaff19173-RA,Eaffi21005-RA,Eaff01862-RA,Egulf02644-RA,Egulf00032-RA,Eaff00672-RA,Eaff06660-RA,Eaffi16611-RA,Eaffi14298-RA,Eaff06661-RA,Eaffi00679-RA,Egulf20571-RA,Eaff07203-RA,Egulf16551-RA,Egulf20960-RA,Egulf08078-RA,Eaff13711-RA,Eaffi21006-RA,Egulf09639-RA,Egulf06741-RA,Eaff01863-RA,Egulf00217-RA,Egulf02643-RA,Eaff16919-RA,Eaff06905-RA,Egulf12847-RA,Egulf08077-RA,
Molecular function	ammonium transmembrane transporter activity	GO:0008519	6	0.00436224	1.7708	20	51	2671	12061	Eaff13715-RA,Eaff02648-RA,Egulf03616-RA,Egulf19768-RA,Egulf14236-RA,Egulf17521-RA,Eaff20065-RA,Eaff14177-RA,Eaffi24131-RA,Egulf00082-RA,Egulf14879-RA,Egulf06816-RA,Eaff13076-RA,Eaff15916-RA,Eaffi17242-RA,Egulf08859-RA,Eaff17861-RA,Eaff07830-RA,Egulf02158-RA,Eaff20011-RA,
Molecular function	transferase activity, transferring nitrogenous groups	GO:0016769	4	0.00436224	1.7708	20	51	2671	12061	Eaff11931-RA,Eaffi23551-RA,Eaffi12423-RA,Egulf06042-RA,Egulf06038-RA,Egulf13034-RA,Egulf17221-RA,Egulf04992-RA,Egulf17130-RA,Eaffi16715-RA,Eaff00094-RA,Egulf06037-RA,Eaff15541-RA,Egulf02489-RA,Egulf08020-RA,Eaff01918-RA,Eaff13905-RA,Eaff16785-RA,Egulf17222-RA,Egulf06041-RA,
Molecular function	cysteine-type endopeptidase regulator activity involved in apoptotic process	GO:0043028	4	0.00458869	1.90128	16	38	2671	12061	Egulf01045-RA,Eaff08717-RA,Egulf01052-RA,Egulf01049-RA,Eaff08711-RA,Eaff08716-RA,Egulf01041-RA,Eaff08713-RA,Eaffi08374-RA,Egulf01047-RA,Eaffi08383-RA,Egulf01051-RA,Eaff08715-RA,Eaffi08376-RA,Eaff08718-RA,Eaffi08380-RA,
Molecular function	metallochaperone activity	GO:0016530	3	0.00469452	2.58031	8	14	2671	12061	Eaffi13587-RA,Eaffi08816-RA,Egulf11522-RA,Eaffi01858-RA,Egulf00628-RA,Eaff05116-RA,Eaff08335-RA,Egulf07865-RA,
Molecular function	eukaryotic initiation factor 4E binding	GO:0008190	5	0.00469452	2.58031	8	14	2671	12061	Eaffi01642-RA,Eaff12060-RA,Eaff19645-RA,Eaffi04757-RA,Eaff01485-RA,Egulf07663-RA,Eaff10974-RA,Egulf05479-RA,
Molecular function	monocarboxylic acid binding	GO:0033293	6	0.00469715	1.60044	28	79	2671	12061	Egulf05101-RA,Eaff04805-RA,Egulf13564-RA,Eaff12733-RA,Egulf19357-RA,Eaffi07931-RA,Eaff10663-RA,Eaff11796-RA,Egulf06761-RA,Eaffi04301-RA,Eaff02222-RA,Eaff11797-RA,Eaff10660-RA,Eaff16426-RA,Eaff01192-RA,Egulf11950-RA,Egulf01460-RA,Egulf19356-RA,Eaff09084-RA,Eaffi07073-RA,Egulf19358-RA,Eaff00689-RA,Egulf08470-RA,Egulf04022-RA,Egulf11177-RA,Egulf05102-RA,Eaff17575-RA,Eaff10661-RA,
Molecular function	metalloendopeptidase activity	GO:0004222	6	0.00506193	1.52008	34	101	2671	12061	Egulf07265-RA,Egulf08080-RA,Egulf17127-RA,Eaff09214-RA,Egulf19943-RA,Egulf07445-RA,Eaffi23554-RA,Eaff14227-RA,Eaff02094-RA,Eaffi04618-RA,Egulf08763-RA,Egulf05369-RA,Egulf16146-RA,Egulf17460-RA,Egulf18340-RA,Eaff15277-RA,Eaffi01417-RA,Egulf02109-RA,Eaff02529-RA,Eaff15544-RA,Eaffi17502-RA,Eaff09708-RA,Eaff19110-RA,Eaff02560-RA,Eaff02736-RA,Eaffi23210-RA,Egulf08610-RA,Eaff01263-RA,Eaffi15102-RA,Egul…
Molecular function	nucleobase-containing compound kinase activity	GO:0019205	6	0.00506193	1.52008	34	101	2671	12061	Egulf20135-RA,Eaffi14731-RA,Eaffi15323-RA,Egulf20689-RA,Eaff07023-RA,Egulf01181-RA,Egulf12164-RA,Egulf00312-RA,Egulf02339-RA,Egulf03007-RA,Eaff07155-RA,Eaff09933-RA,Eaff07908-RA,Egulf12871-RA,Egulf15904-RA,Egulf02337-RA,Egulf20871-RA,Egulf02338-RA,Eaffi08259-RA,Eaff18654-RA,Eaffi21188-RA,Eaff17431-RA,Eaffi09203-RA,Eaff14528-RA,Egulf14277-RA,Eaff16899-RA,Eaff14015-RA,Eaffi14933-RA,Eaff05204-RA,Eaf…
Molecular function	histone lysine N-methyltransferase activity	GO:0018024	9	0.00523486	1.80621	18	45	2671	12061	Egulf15807-RA,Egulf05137-RA,Egulf01469-RA,Eaffi18129-RA,Egulf01470-RA,Eaffi13385-RA,Egulf09394-RA,Eaff09093-RA,Eaffi07912-RA,Eaffi00359-RA,Eaffi18131-RA,Eaffi10856-RA,Egulf20305-RA,Eaff03108-RA,Eaff18124-RA,Egulf11327-RA,Eaff11827-RA,Eaffi00514-RA,
Molecular function	disulfide oxidoreductase activity	GO:0015036	5	0.00526497	1.67512	23	62	2671	12061	Egulf21133-RA,Egulf01388-RA,Eaff03916-RA,Eaffi14067-RA,Egulf16380-RA,Eaffi11588-RA,Eaffi08816-RA,Eaff17002-RA,Egulf21596-RA,Eaff14096-RA,Egulf09851-RA,Eaff18760-RA,Eaff14652-RA,Eaffi16653-RA,Egulf00628-RA,Eaff06488-RA,Eaff06092-RA,Eaff08335-RA,Eaff03578-RA,Eaffi11713-RA,Egulf00217-RA,Egulf03082-RA,Egulf12754-RA,
Molecular function	carbon monoxide binding	GO:0070025	3	0.00527085	3.01036	6	9	2671	12061	Eaff02181-RA,Egulf08518-RA,Eaff02605-RA,Egulf08807-RA,Eaff02180-RA,Egulf08519-RA,
Molecular function	nitric oxide binding	GO:0070026	3	0.00527085	3.01036	6	9	2671	12061	Eaff02181-RA,Egulf08518-RA,Eaff02605-RA,Egulf08807-RA,Eaff02180-RA,Egulf08519-RA,
Molecular function	phosphatidylserine decarboxylase activity	GO:0004609	6	0.00527085	3.01036	6	9	2671	12061	Eaffi23551-RA,Eaffi12423-RA,Egulf17130-RA,Eaff15541-RA,Egulf02489-RA,Eaff13905-RA,
Molecular function	flippase activity	GO:0140327	6	0.00527085	3.01036	6	9	2671	12061	Eaff09690-RA,Eaff16419-RA,Egulf18312-RA,Egulf08159-RA,Eaffi05757-RA,Eaff18076-RA,
Molecular function	troponin C binding	GO:0030172	5	0.00527085	3.01036	6	9	2671	12061	Eaff17680-RA,Eaff16646-RA,Egulf13362-RA,Eaffi09979-RA,Eaffi15872-RA,Egulf13280-RA,
Molecular function	monoatomic cation efflux transmembrane transporter activity	GO:0046583	6	0.00527085	3.01036	6	9	2671	12061	Eaff16655-RA,Eaffi13559-RA,Eaff05094-RA,Egulf13256-RA,Eaffi15849-RA,Egulf11494-RA,
Molecular function	troponin T binding	GO:0031014	5	0.00527085	3.01036	6	9	2671	12061	Eaff17680-RA,Eaff16646-RA,Egulf13362-RA,Eaffi09979-RA,Eaffi15872-RA,Egulf13280-RA,
Molecular function	zinc efflux transmembrane transporter activity	GO:0022883	9	0.00527085	3.01036	6	9	2671	12061	Eaff16655-RA,Eaffi13559-RA,Eaff05094-RA,Egulf13256-RA,Eaffi15849-RA,Egulf11494-RA,
Molecular function	chondroitin sulfate proteoglycan binding	GO:0035373	5	0.00527085	3.01036	6	9	2671	12061	Egulf04927-RA,Eaff11986-RA,Eaffi04079-RA,Egulf04928-RA,Eaff11984-RA,Eaff11985-RA,
Molecular function	L-cysteine transaminase activity	GO:0047801	6	0.00527085	3.01036	6	9	2671	12061	Eaffi23551-RA,Eaffi12423-RA,Egulf17130-RA,Eaff15541-RA,Egulf02489-RA,Eaff13905-RA,
Molecular function	telomerase activity	GO:0003720	8	0.00527085	3.01036	6	9	2671	12061	Eaff04750-RA,Eaff13253-RA,Egulf11112-RA,Egulf01854-RA,Egulf03414-RA,Eaffi02313-RA,
Molecular function	extracellular matrix protein binding	GO:1990430	4	0.00527085	3.01036	6	9	2671	12061	Eaff11639-RA,Egulf04030-RA,Egulf05346-RA,Eaffi03115-RA,Eaffi04579-RA,Eaff12726-RA,
Molecular function	RNA-directed DNA polymerase activity	GO:0003964	7	0.00527085	3.01036	6	9	2671	12061	Eaff04750-RA,Eaff13253-RA,Egulf11112-RA,Egulf01854-RA,Egulf03414-RA,Eaffi02313-RA,
Molecular function	L-aspartate:2-oxoglutarate aminotransferase activity	GO:0004069	6	0.00527085	3.01036	6	9	2671	12061	Eaffi23551-RA,Eaffi12423-RA,Egulf17130-RA,Eaff15541-RA,Egulf02489-RA,Eaff13905-RA,
Molecular function	oxidoreductase activity, acting on CH or CH2 groups, NAD or NADP as acceptor	GO:0016726	5	0.00532981	2.39058	9	17	2671	12061	Egulf16073-RA,Egulf16439-RA,Eaffi16531-RA,Eaff16871-RA,Egulf04950-RA,Eaffi20001-RA,Eaffi04109-RA,Eaff18826-RA,Eaff19084-RA,
Molecular function	xanthine dehydrogenase activity	GO:0004854	6	0.00532981	2.39058	9	17	2671	12061	Egulf16073-RA,Egulf16439-RA,Eaffi16531-RA,Eaff16871-RA,Egulf04950-RA,Eaffi20001-RA,Eaffi04109-RA,Eaff18826-RA,Eaff19084-RA,
Molecular function	single-stranded RNA binding	GO:0003727	6	0.00549712	1.3894	52	169	2671	12061	Eaff12249-RA,Eaff18587-RA,Egulf07306-RA,Eaffi16011-RA,Eaff15146-RA,Egulf04651-RA,Egulf15955-RA,Egulf20070-RA,Eaffi01285-RA,Egulf15213-RA,Egulf13675-RA,Eaffi09601-RA,Egulf04607-RA,Eaff07081-RA,Eaffi15366-RA,Eaffi19879-RA,Egulf17630-RA,Egulf15956-RA,Eaff17428-RA,Egulf12171-RA,Eaff08669-RA,Egulf15211-RA,Eaff06495-RA,Eaff19413-RA,Eaff18457-RA,Egulf01001-RA,Eaff08775-RA,Eaffi20204-RA,Egulf15446-RA,Eaf…
Molecular function	intracellular chloride channel activity	GO:0061778	9	0.00572555	2.1596	11	23	2671	12061	Eaff07460-RA,Egulf01248-RA,Egulf12865-RA,Egulf13491-RA,Eaff09222-RA,Eaff01659-RA,Egulf20091-RA,Eaffi04280-RA,Egulf01621-RA,Eaff11839-RA,Egulf06902-RA,
Molecular function	intracellular calcium activated chloride channel activity	GO:0005229	10	0.00572555	2.1596	11	23	2671	12061	Eaff07460-RA,Egulf01248-RA,Egulf12865-RA,Egulf13491-RA,Eaff09222-RA,Eaff01659-RA,Egulf20091-RA,Eaffi04280-RA,Egulf01621-RA,Eaff11839-RA,Egulf06902-RA,
Molecular function	guanyl nucleotide binding	GO:0019001	7	0.00588838	1.29015	82	287	2671	12061	Eaff07460-RA,Egulf06159-RA,Eaff14623-RA,Egulf01364-RA,Egulf22140-RA,Eaff07714-RA,Eaffi16810-RA,Egulf19787-RA,Egulf20135-RA,Egulf21587-RA,Eaffi15323-RA,Egulf00279-RA,Eaff08383-RA,Eaff06101-RA,Eaff11504-RA,Egulf12386-RA,Eaff10704-RA,Egulf09489-RA,Eaff00148-RA,Eaffi08650-RA,Eaff03814-RA,Eaffi08649-RA,Eaff14297-RA,Eaff02253-RA,Egulf08450-RA,Eaff07155-RA,Eaff07908-RA,Eaff07985-RA,Eaff03186-RA,Egulf012…
Molecular function	guanyl ribonucleotide binding	GO:0032561	8	0.00588838	1.29015	82	287	2671	12061	Eaff07460-RA,Egulf06159-RA,Eaff14623-RA,Egulf01364-RA,Egulf22140-RA,Eaff07714-RA,Eaffi16810-RA,Egulf19787-RA,Egulf20135-RA,Egulf21587-RA,Eaffi15323-RA,Egulf00279-RA,Eaff08383-RA,Eaff06101-RA,Eaff11504-RA,Egulf12386-RA,Eaff10704-RA,Egulf09489-RA,Eaff00148-RA,Eaffi08650-RA,Eaff03814-RA,Eaffi08649-RA,Eaff14297-RA,Eaff02253-RA,Egulf08450-RA,Eaff07155-RA,Eaff07908-RA,Eaff07985-RA,Eaff03186-RA,Egulf012…
Molecular function	N-methyltransferase activity	GO:0008170	6	0.00601044	1.50518	34	102	2671	12061	Eaffi16694-RA,Egulf15807-RA,Egulf05137-RA,Eaff17367-RA,Egulf01469-RA,Eaffi18129-RA,Egulf01470-RA,Eaff02506-RA,Eaffi13385-RA,Eaff15853-RA,Egulf09394-RA,Eaffi13655-RA,Eaff15344-RA,Egulf17307-RA,Eaff09093-RA,Eaffi07912-RA,Eaffi00359-RA,Eaff10511-RA,Eaffi18131-RA,Eaffi23329-RA,Egulf17308-RA,Eaffi10856-RA,Egulf20305-RA,Egulf19452-RA,Eaff03108-RA,Egulf11594-RA,Eaff18124-RA,Eaff05175-RA,Egulf11327-RA,Ea…
Molecular function	binding	GO:0005488	2	0.00641057	1.02378	2087	9205	2671	12061	Egulf04437-RA,Eaffi21345-RA,Eaff12249-RA,Eaffi21906-RA,Eaff06489-RA,Egulf20802-RA,Eaffi14133-RA,Egulf01045-RA,Eaff12123-RA,Eaff15515-RA,Eaff09079-RA,Eaff09080-RA,Egulf21337-RA,Eaff05827-RA,Eaffi04572-RA,Eaff18587-RA,Eaffi05771-RA,Eaff01580-RA,Eaff07460-RA,Eaff01338-RA,Egulf01708-RA,Egulf03455-RA,Eaffi07939-RA,Egulf06159-RA,Eaffi16694-RA,Eaff11931-RA,Eaff04731-RA,Eaffi09126-RA,Eaff01936-RA,Eaffi08…
Molecular function	7S RNA binding	GO:0008312	6	0.00708739	2.63406	7	12	2671	12061	Eaff11447-RA,Egulf21587-RA,Eaff06101-RA,Egulf05581-RA,Eaff11446-RA,Eaffi04862-RA,Eaffi22335-RA,
Molecular function	non-membrane spanning protein tyrosine phosphatase activity	GO:0004726	9	0.00708739	2.63406	7	12	2671	12061	Eaff09398-RA,Egulf14376-RA,Eaffi18400-RA,Eaffi07511-RA,Eaff09399-RA,Eaffi07509-RA,Eaff02873-RA,
Molecular function	protein-membrane adaptor activity	GO:0043495	4	0.00708739	2.63406	7	12	2671	12061	Eaff17998-RA,Eaffi11117-RA,Egulf10635-RA,Eaff04335-RA,Eaffi10227-RA,Egulf05663-RA,Egulf15056-RA,
Molecular function	beta-1,3-galactosyltransferase activity	GO:0048531	7	0.00708739	2.63406	7	12	2671	12061	Eaff03354-RA,Eaff19959-RA,Egulf09650-RA,Egulf02378-RA,Egulf12196-RA,Eaff19444-RA,Egulf05421-RA,
Molecular function	3',5'-cyclic-nucleotide phosphodiesterase activity	GO:0004114	8	0.00722318	1.91568	14	33	2671	12061	Eaff11504-RA,Eaffi08650-RA,Eaffi08649-RA,Eaff07985-RA,Eaff11503-RA,Eaffi04814-RA,Eaff08474-RA,Egulf00774-RA,Egulf17078-RA,Egulf00777-RA,Egulf05514-RA,Eaffi04815-RA,Eaff08475-RA,Egulf00273-RA,
Molecular function	cadherin binding	GO:0045296	5	0.00731411	1.61751	24	67	2671	12061	Eaff10167-RA,Eaff03814-RA,Egulf18190-RA,Eaff09541-RA,Eaffi05417-RA,Egulf18840-RA,Eaff10921-RA,Egulf04548-RA,Eaffi02733-RA,Eaffi03647-RA,Eaff12957-RA,Egulf15991-RA,Eaff18793-RA,Egulf19517-RA,Eaff10923-RA,Eaffi07254-RA,Egulf16112-RA,Egulf19516-RA,Eaffi20353-RA,Eaff10922-RA,Egulf19519-RA,Eaff02391-RA,Eaff18754-RA,Eaff12287-RA,
Molecular function	pristanoyl-CoA oxidase activity	GO:0016402	7	0.00743216	3.22538	5	7	2671	12061	Eaff12733-RA,Eaffi07931-RA,Egulf01460-RA,Eaff09084-RA,Egulf04022-RA,
Molecular function	obsolete electron transporter, transferring electrons from CoQH2-cytochrome c reductase complex and cytochrome c oxidase complex activity	GO:0045155	0	0.00743216	3.22538	5	7	2671	12061	Eaff04505-RA,Eaffi12800-RA,Egulf15930-RA,Egulf10821-RA,Eaff18673-RA,
Molecular function	mechanosensitive monoatomic ion channel activity	GO:0008381	8	0.00743216	3.22538	5	7	2671	12061	Eaff01680-RA,Eaffi21202-RA,Egulf08908-RA,Eaff02695-RA,Eaff01678-RA,
Molecular function	RNA polymerase I core binding	GO:0001042	7	0.00743216	3.22538	5	7	2671	12061	Eaff06642-RA,Eaffi14283-RA,Egulf20978-RA,Eaff06644-RA,Eaff06643-RA,
Molecular function	1,3-alpha-L-fucosidase activity	GO:0033932	8	0.00743216	3.22538	5	7	2671	12061	Egulf07712-RA,Egulf07345-RA,Eaff01200-RA,Eaff01535-RA,Eaffi01333-RA,
Molecular function	glycoprotein 3-alpha-L-fucosyltransferase activity	GO:0018392	8	0.00743216	3.22538	5	7	2671	12061	Egulf07712-RA,Egulf07345-RA,Eaff01200-RA,Eaff01535-RA,Eaffi01333-RA,
Molecular function	cuprous ion binding	GO:1903136	8	0.00743216	3.22538	5	7	2671	12061	Eaffi13587-RA,Egulf11522-RA,Eaffi01858-RA,Eaff05116-RA,Egulf07865-RA,
Molecular function	lipoic acid binding	GO:0031405	8	0.00743216	3.22538	5	7	2671	12061	Egulf05101-RA,Eaff11796-RA,Eaffi04301-RA,Eaff11797-RA,Egulf05102-RA,
Molecular function	anaphase-promoting complex binding	GO:0010997	4	0.00743216	3.22538	5	7	2671	12061	Eaffi11711-RA,Egulf04360-RA,Eaff14098-RA,Egulf02245-RA,Eaff12439-RA,
Molecular function	cell adhesion molecule binding	GO:0050839	4	0.00752446	1.3154	67	230	2671	12061	Eaff01338-RA,Eaff16534-RA,Eaff11639-RA,Eaffi01840-RA,Egulf16380-RA,Egulf04927-RA,Eaff10167-RA,Eaff06883-RA,Egulf13427-RA,Eaff03814-RA,Egulf22158-RA,Eaffi14602-RA,Egulf18190-RA,Egulf14376-RA,Egulf18979-RA,Egulf05016-RA,Egulf04030-RA,Eaffi18400-RA,Eaff09541-RA,Eaff06884-RA,Eaffi05417-RA,Egulf13428-RA,Eaff11986-RA,Eaffi04079-RA,Egulf07507-RA,Egulf18840-RA,Eaff10921-RA,Eaff06642-RA,Egulf20546-RA,Egul…
Molecular function	protein kinase A regulatory subunit binding	GO:0034237	5	0.00814462	2.00691	12	27	2671	12061	Eaff20005-RA,Eaff18201-RA,Egulf05093-RA,Egulf08232-RA,Egulf08234-RA,Eaff11833-RA,Eaffi04288-RA,Eaff18029-RA,Egulf08233-RA,Eaff01687-RA,Eaffi04286-RA,Eaff18202-RA,
Molecular function	very long-chain fatty acid-CoA ligase activity	GO:0031957	7	0.00814462	2.00691	12	27	2671	12061	Eaffi19542-RA,Eaff13187-RA,Eaffi02589-RA,Eaff12985-RA,Egulf03636-RA,Egulf19658-RA,Eaffi07422-RA,Egulf16688-RA,Eaff13053-RA,Egulf03498-RA,Eaff19267-RA,Egulf03711-RA,
Molecular function	nucleoside kinase activity	GO:0019206	7	0.00848421	2.06962	11	24	2671	12061	Egulf01181-RA,Egulf02339-RA,Eaff09933-RA,Egulf12871-RA,Egulf02337-RA,Egulf02338-RA,Eaffi08259-RA,Eaff16899-RA,Eaff14015-RA,Eaff05033-RA,Eaff08824-RA,
Molecular function	phosphoserine residue binding	GO:0050815	6	0.00858763	2.25777	9	18	2671	12061	Egulf03182-RA,Eaff20185-RA,Egulf17769-RA,Eaff13756-RA,Eaffi22699-RA,Eaffi11222-RA,Eaffi03012-RA,Eaff15087-RA,Egulf02593-RA,
Molecular function	protein tyrosine kinase activator activity	GO:0030296	7	0.0086633	2.15026	10	21	2671	12061	Eaff06642-RA,Eaff18793-RA,Eaffi14283-RA,Egulf20978-RA,Eaff06644-RA,Egulf20876-RA,Egulf16112-RA,Eaffi20353-RA,Eaff06643-RA,Eaff07178-RA,
Molecular function	carbohydrate phosphatase activity	GO:0019203	7	0.0086633	2.15026	10	21	2671	12061	Eaffi03097-RA,Egulf04534-RA,Eaffi03632-RA,Eaff12746-RA,Egulf04847-RA,Eaff12046-RA,Eaff12297-RA,Eaff14711-RA,Egulf04009-RA,Eaffi04011-RA,
Molecular function	histone acetyltransferase binding	GO:0035035	5	0.00884966	1.72935	18	47	2671	12061	Egulf09781-RA,Eaff19058-RA,Egulf16403-RA,Eaffi17717-RA,Egulf12882-RA,Egulf09783-RA,Egulf16402-RA,Eaff03513-RA,Eaff10790-RA,Egulf12880-RA,Eaff19057-RA,Eaffi16551-RA,Eaffi17719-RA,Eaff18627-RA,Eaff16891-RA,Eaffi13922-RA,Eaff03512-RA,Egulf13231-RA,
Molecular function	cyclic-nucleotide phosphodiesterase activity	GO:0004112	7	0.00982094	1.85934	14	34	2671	12061	Eaff11504-RA,Eaffi08650-RA,Eaffi08649-RA,Eaff07985-RA,Eaff11503-RA,Eaffi04814-RA,Eaff08474-RA,Egulf00774-RA,Egulf17078-RA,Egulf00777-RA,Egulf05514-RA,Eaffi04815-RA,Eaff08475-RA,Egulf00273-RA,
Molecular function	calcium channel regulator activity	GO:0005246	5	0.0102027	1.63494	21	58	2671	12061	Eaffi01410-RA,Egulf00537-RA,Eaff16655-RA,Eaffi13559-RA,Eaff12671-RA,Eaff11178-RA,Eaff20185-RA,Eaff08233-RA,Eaffi03176-RA,Eaff15736-RA,Eaff05094-RA,Eaffi08938-RA,Eaff13428-RA,Egulf05891-RA,Eaff13756-RA,Egulf13256-RA,Eaffi15849-RA,Eaffi18487-RA,Egulf11494-RA,Egulf04090-RA,Egulf02593-RA,
Molecular function	NADP binding	GO:0050661	8	0.0102027	1.63494	21	58	2671	12061	Eaffi16723-RA,Egulf18921-RA,Eaffi16338-RA,Egulf05955-RA,Egulf13025-RA,Egulf06586-RA,Eaff04278-RA,Eaff00543-RA,Eaff08702-RA,Eaffi02937-RA,Egulf10578-RA,Eaffi05271-RA,Egulf12435-RA,Eaffi23723-RA,Egulf03884-RA,Eaff17248-RA,Eaff10237-RA,Eaff11096-RA,Eaffi06469-RA,Eaff19641-RA,Egulf01029-RA,
Molecular function	protein-disulfide reductase activity	GO:0015035	6	0.0102027	1.63494	21	58	2671	12061	Egulf21133-RA,Egulf01388-RA,Eaff03916-RA,Eaffi14067-RA,Egulf16380-RA,Eaffi11588-RA,Eaffi08816-RA,Eaff17002-RA,Egulf21596-RA,Eaff14096-RA,Egulf09851-RA,Eaff14652-RA,Eaffi16653-RA,Egulf00628-RA,Eaff06488-RA,Eaff06092-RA,Eaff08335-RA,Eaff03578-RA,Eaffi11713-RA,Egulf03082-RA,Egulf12754-RA,
Molecular function	intracellular ligand-gated monoatomic ion channel activity	GO:0005217	9	0.0106324	1.89361	13	31	2671	12061	Eaffi16810-RA,Eaff20005-RA,Egulf18099-RA,Egulf05093-RA,Eaff18470-RA,Egulf19665-RA,Eaffi05670-RA,Eaff11833-RA,Eaffi04288-RA,Eaffi03605-RA,Egulf14548-RA,Egulf18100-RA,Eaffi04286-RA,
Molecular function	porin activity	GO:0015288	7	0.0107177	2.70932	6	10	2671	12061	Egulf17829-RA,Eaff14897-RA,Eaff05741-RA,Eaff14896-RA,Egulf21983-RA,Eaffi21805-RA,
Molecular function	7SK snRNA binding	GO:0097322	7	0.0107177	2.70932	6	10	2671	12061	Eaff18587-RA,Egulf15213-RA,Eaffi09601-RA,Egulf15211-RA,Eaffi09602-RA,Eaff18588-RA,
Molecular function	obsolete cofactor binding	GO:0048037	0	0.0107767	1.20414	124	465	2671	12061	Eaffi05771-RA,Eaffi16694-RA,Egulf05101-RA,Eaffi16723-RA,Egulf18921-RA,Eaffi16338-RA,Eaff19173-RA,Eaff04805-RA,Egulf06042-RA,Egulf16073-RA,Eaff12733-RA,Eaff17367-RA,Egulf05955-RA,Eaffi07931-RA,Egulf21604-RA,Egulf02644-RA,Eaff11796-RA,Eaff09632-RA,Egulf13025-RA,Eaff04505-RA,Egulf06586-RA,Egulf00416-RA,Egulf06038-RA,Egulf05413-RA,Eaff15853-RA,Eaffi04301-RA,Eaffi14977-RA,Eaff04278-RA,Eaffi09244-RA,Ea…
Molecular function	DNA-binding transcription factor activity	GO:0003700	3	0.0111944	1.13463	247	983	2671	12061	Egulf01045-RA,Eaff01580-RA,Egulf01708-RA,Egulf14723-RA,Egulf13179-RA,Egulf15705-RA,Egulf18307-RA,Eaffi10725-RA,Egulf09781-RA,Egulf15807-RA,Eaff02589-RA,Egulf19357-RA,Eaff12568-RA,Egulf22344-RA,Eaffi03884-RA,Eaff00651-RA,Eaffi05628-RA,Eaff10964-RA,Eaffi17950-RA,Eaffi18129-RA,Eaffi21782-RA,Egulf18569-RA,Egulf05615-RA,Eaffi11384-RA,Eaff08717-RA,Eaff10663-RA,Eaffi23148-RA,Eaff02518-RA,Eaffi16673-RA,E…
Molecular function	metallopeptidase activity	GO:0008237	5	0.012008	1.31993	57	195	2671	12061	Eaff07841-RA,Egulf00101-RA,Egulf21235-RA,Egulf07265-RA,Egulf08080-RA,Egulf17127-RA,Eaffi19660-RA,Eaff09214-RA,Egulf07923-RA,Egulf19943-RA,Egulf16553-RA,Egulf07445-RA,Eaffi23554-RA,Eaffi23866-RA,Egulf19217-RA,Egulf03945-RA,Eaff14227-RA,Eaffi06870-RA,Egulf17483-RA,Egulf21234-RA,Eaff02094-RA,Eaffi04618-RA,Eaff11595-RA,Egulf08763-RA,Egulf05369-RA,Egulf16146-RA,Egulf00476-RA,Egulf17460-RA,Egulf05386-R…
Molecular function	obsolete transcription regulator recruiting activity	GO:0001134	0	0.0124466	2.43144	7	13	2671	12061	Egulf13179-RA,Egulf12268-RA,Eaff17293-RA,Eaffi16209-RA,Eaffi15724-RA,Eaff17335-RA,Egulf12369-RA,
Molecular function	aminoacyl-tRNA editing activity	GO:0002161	6	0.0124466	2.43144	7	13	2671	12061	Egulf14522-RA,Egulf12625-RA,Eaff15751-RA,Eaff17083-RA,Eaff07314-RA,Egulf20248-RA,Eaffi16864-RA,
Molecular function	structural molecule activity conferring elasticity	GO:0097493	3	0.0124466	2.43144	7	13	2671	12061	Eaffi05569-RA,Eaff09656-RA,Eaffi02849-RA,Eaff06505-RA,Egulf18288-RA,Eaff12898-RA,Egulf03826-RA,
Molecular function	BMP binding	GO:0036122	5	0.0124466	2.43144	7	13	2671	12061	Egulf16154-RA,Eaff18857-RA,Egulf06374-RA,Egulf20876-RA,Eaffi00330-RA,Eaff00345-RA,Eaff07178-RA,
Molecular function	protein kinase A binding	GO:0051018	4	0.0127381	1.64991	19	52	2671	12061	Eaff20005-RA,Eaff18201-RA,Egulf08166-RA,Egulf05093-RA,Egulf08232-RA,Eaff01779-RA,Egulf08168-RA,Eaffi01990-RA,Egulf01081-RA,Egulf08234-RA,Eaff11833-RA,Eaffi04288-RA,Eaff18029-RA,Egulf08233-RA,Eaff01687-RA,Eaff01778-RA,Eaffi04286-RA,Eaff18202-RA,Eaff08743-RA,
Molecular function	nucleotidase activity	GO:0008252	7	0.0127793	2.05252	10	22	2671	12061	Egulf03455-RA,Eaffi02363-RA,Eaffi14731-RA,Egulf20689-RA,Eaff07023-RA,Eaff07665-RA,Eaff19807-RA,Eaff05204-RA,Egulf19858-RA,Eaffi15029-RA,
Molecular function	lysophospholipase activity	GO:0004622	7	0.0127793	2.05252	10	22	2671	12061	Egulf05051-RA,Egulf14898-RA,Eaff17877-RA,Eaff11875-RA,Egulf01894-RA,Egulf07709-RA,Egulf05049-RA,Eaffi04227-RA,Eaffi11977-RA,Eaff14435-RA,
Molecular function	pseudouridine synthase activity	GO:0009982	5	0.0131303	2.25777	8	16	2671	12061	Egulf01823-RA,Eaff07939-RA,Eaff09408-RA,Egulf17256-RA,Eaffi09339-RA,Egulf00228-RA,Eaff15448-RA,Eaffi23477-RA,
Molecular function	kinase binding	GO:0019900	5	0.0132482	1.12778	256	1025	2671	12061	Eaffi21345-RA,Eaff12249-RA,Eaff06489-RA,Eaff18703-RA,Eaff14226-RA,Eaffi06041-RA,Eaff17998-RA,Eaff01084-RA,Eaff19173-RA,Eaff19058-RA,Egulf21938-RA,Eaffi05569-RA,Eaffi17667-RA,Eaff09656-RA,Egulf07916-RA,Eaff17367-RA,Eaffi10278-RA,Eaffi02279-RA,Eaffi11711-RA,Eaffi14578-RA,Egulf04651-RA,Egulf19416-RA,Egulf18134-RA,Eaff09599-RA,Egulf00537-RA,Eaffi02849-RA,Egulf18545-RA,Eaff14179-RA,Egulf13623-RA,Egulf…
Molecular function	oxidoreductase activity, acting on a sulfur group of donors	GO:0016667	4	0.0133757	1.50518	27	81	2671	12061	Egulf21133-RA,Egulf01388-RA,Eaff03916-RA,Eaffi14067-RA,Egulf16380-RA,Eaffi11588-RA,Eaffi08816-RA,Eaff17002-RA,Egulf21596-RA,Egulf10345-RA,Eaff14096-RA,Egulf09851-RA,Eaff18760-RA,Eaff14652-RA,Eaffi16653-RA,Egulf00628-RA,Eaff06488-RA,Egulf10131-RA,Eaff06092-RA,Eaff08335-RA,Eaff03578-RA,Eaffi11713-RA,Egulf10130-RA,Eaff04028-RA,Egulf00217-RA,Egulf03082-RA,Egulf12754-RA,
Molecular function	endopeptidase regulator activity	GO:0061135	5	0.0137627	1.57685	22	63	2671	12061	Egulf01045-RA,Egulf12619-RA,Eaff11931-RA,Eaff08717-RA,Egulf01052-RA,Egulf13034-RA,Egulf04992-RA,Egulf01049-RA,Eaff08711-RA,Eaffi16715-RA,Eaff08716-RA,Egulf01041-RA,Eaff08713-RA,Eaffi08374-RA,Egulf01047-RA,Eaffi08383-RA,Egulf01051-RA,Eaff16785-RA,Eaff08715-RA,Eaffi08376-RA,Eaff08718-RA,Eaffi08380-RA,
Molecular function	copper ion binding	GO:0005507	7	0.0142315	1.65877	18	49	2671	12061	Eaffi13587-RA,Eaffi08816-RA,Egulf01181-RA,Eaff15931-RA,Eaff03814-RA,Eaff16004-RA,Egulf14131-RA,Eaffi18659-RA,Egulf11522-RA,Eaffi01858-RA,Egulf00628-RA,Eaff05116-RA,Eaff08335-RA,Eaff07138-RA,Eaff01672-RA,Eaff03400-RA,Egulf21692-RA,Egulf07865-RA,
Molecular function	monocarboxylic acid transmembrane transporter activity	GO:0008028	6	0.0142315	1.65877	18	49	2671	12061	Eaffi19542-RA,Eaff13187-RA,Egulf16610-RA,Eaff10850-RA,Eaffi02589-RA,Eaff12985-RA,Egulf03636-RA,Egulf13577-RA,Egulf19658-RA,Eaffi07422-RA,Egulf16688-RA,Eaff13053-RA,Egulf03498-RA,Eaff18036-RA,Egulf21655-RA,Eaff19267-RA,Eaff06001-RA,Egulf03711-RA,
Molecular function	nucleotide transmembrane transporter activity	GO:0015215	5	0.0143477	1.83444	13	32	2671	12061	Eaffi15139-RA,Eaff16832-RA,Egulf09059-RA,Egulf07538-RA,Eaff02834-RA,Eaff02837-RA,Eaffi01523-RA,Eaff09004-RA,Egulf09064-RA,Egulf12940-RA,Egulf14331-RA,Eaff15683-RA,Eaff01368-RA,
Molecular function	fatty acid binding	GO:0005504	7	0.0154446	1.58044	21	60	2671	12061	Egulf05101-RA,Eaff04805-RA,Egulf13564-RA,Eaff12733-RA,Eaffi07931-RA,Eaff11796-RA,Egulf06761-RA,Eaffi04301-RA,Eaff02222-RA,Eaff11797-RA,Eaff16426-RA,Eaff01192-RA,Egulf11950-RA,Egulf01460-RA,Eaff09084-RA,Eaff00689-RA,Egulf08470-RA,Egulf04022-RA,Egulf11177-RA,Egulf05102-RA,Eaff17575-RA,
Molecular function	efflux transmembrane transporter activity	GO:0015562	4	0.0154829	1.73675	15	39	2671	12061	Eaffi00389-RA,Eaff16655-RA,Eaffi19291-RA,Eaffi13559-RA,Eaffi19287-RA,Eaffi18218-RA,Eaff00400-RA,Egulf09324-RA,Egulf21992-RA,Eaff05094-RA,Eaff03044-RA,Egulf13256-RA,Eaff05733-RA,Eaffi15849-RA,Egulf11494-RA,
Molecular function	protein serine/threonine kinase inhibitor activity	GO:0030291	2	0.0156445	1.8685	12	29	2671	12061	Eaff19058-RA,Egulf03699-RA,Egulf16403-RA,Eaff16081-RA,Egulf16402-RA,Eaff20185-RA,Egulf03183-RA,Egulf14044-RA,Eaff12994-RA,Eaff13756-RA,Eaff19057-RA,Egulf02593-RA,
Molecular function	G protein-coupled receptor activity	GO:0004930	5	0.0156524	1.3329	49	166	2671	12061	Eaff07460-RA,Eaff16534-RA,Eaff18894-RA,Eaff07423-RA,Eaff10384-RA,Eaff03216-RA,Egulf10298-RA,Eaff03120-RA,Eaff07643-RA,Egulf13427-RA,Egulf09416-RA,Eaff16995-RA,Egulf16156-RA,Eaff04008-RA,Egulf01239-RA,Egulf20133-RA,Egulf09641-RA,Egulf10392-RA,Egulf06440-RA,Egulf13428-RA,Egulf16364-RA,Eaff05267-RA,Egulf01248-RA,Egulf16016-RA,Eaff08114-RA,Egulf19067-RA,Egulf00403-RA,Egulf01294-RA,Egulf12865-RA,Eaff0…
Molecular function	antioxidant activity	GO:0016209	2	0.0158364	1.48682	27	82	2671	12061	Egulf20904-RA,Eaffi18568-RA,Eaff03916-RA,Egulf14212-RA,Egulf21596-RA,Eaff15931-RA,Eaff16004-RA,Egulf14131-RA,Eaffi18659-RA,Egulf05056-RA,Egulf10345-RA,Egulf20571-RA,Eaff07203-RA,Egulf05475-RA,Egulf10131-RA,Egulf09639-RA,Eaff06092-RA,Eaff07138-RA,Egulf10130-RA,Eaff04028-RA,Egulf00217-RA,Eaff03400-RA,Eaff11871-RA,Eaffi23388-RA,Eaff07418-RA,Eaff06905-RA,Eaffi04234-RA,
Molecular function	symporter activity	GO:0015293	6	0.0161083	1.36441	42	139	2671	12061	Eaff17478-RA,Eaff04677-RA,Egulf06466-RA,Egulf00886-RA,Egulf02095-RA,Egulf20268-RA,Eaff00425-RA,Egulf16610-RA,Eaff10850-RA,Eaffi02118-RA,Egulf11029-RA,Egulf17477-RA,Eaffi01162-RA,Eaff01053-RA,Eaff18578-RA,Eaff19211-RA,Eaff18430-RA,Egulf21912-RA,Eaff04678-RA,Eaff16892-RA,Eaff14243-RA,Egulf15238-RA,Eaffi16123-RA,Egulf06816-RA,Egulf12881-RA,Eaffi17242-RA,Egulf07189-RA,Egulf07190-RA,Eaff07294-RA,Egulf…
Molecular function	solute:monoatomic cation symporter activity	GO:0015294	7	0.0161083	1.36441	42	139	2671	12061	Eaff17478-RA,Eaff04677-RA,Egulf06466-RA,Egulf00886-RA,Egulf02095-RA,Egulf20268-RA,Eaff00425-RA,Egulf16610-RA,Eaff10850-RA,Eaffi02118-RA,Egulf11029-RA,Egulf17477-RA,Eaffi01162-RA,Eaff01053-RA,Eaff18578-RA,Eaff19211-RA,Eaff18430-RA,Egulf21912-RA,Eaff04678-RA,Eaff16892-RA,Eaff14243-RA,Egulf15238-RA,Eaffi16123-RA,Egulf06816-RA,Egulf12881-RA,Eaffi17242-RA,Egulf07189-RA,Egulf07190-RA,Eaff07294-RA,Egulf…
Molecular function	oxidoreductase activity, acting on the CH-NH2 group of donors, NAD or NADP as acceptor	GO:0016639	5	0.0162145	2.82221	5	8	2671	12061	Eaff15956-RA,Eaff14417-RA,Egulf01912-RA,Eaffi11958-RA,Egulf14185-RA,
Molecular function	RISC complex binding	GO:1905172	5	0.0162145	2.82221	5	8	2671	12061	Eaffi06013-RA,Egulf10874-RA,Eaff09864-RA,Egulf18525-RA,Eaffi12746-RA,
Molecular function	1-acylglycerophosphocholine O-acyltransferase activity	GO:0047184	7	0.0162145	2.82221	5	8	2671	12061	Egulf04047-RA,Eaff12710-RA,Eaff16185-RA,Eaffi03142-RA,Egulf13897-RA,
Molecular function	sulfate binding	GO:0043199	5	0.0162145	2.82221	5	8	2671	12061	Eaff01580-RA,Eaffi17950-RA,Eaff01581-RA,Egulf07766-RA,Eaffi01745-RA,
Molecular function	gamma-aminobutyric acid transmembrane transporter activity	GO:0015185	7	0.0162145	2.82221	5	8	2671	12061	Egulf16610-RA,Eaff10850-RA,Eaff18036-RA,Egulf21655-RA,Eaff06001-RA,
Molecular function	secondary active monocarboxylate transmembrane transporter activity	GO:0015355	7	0.0162145	2.82221	5	8	2671	12061	Egulf16610-RA,Eaff10850-RA,Eaff18036-RA,Egulf21655-RA,Eaff06001-RA,
Molecular function	calcium-induced calcium release activity	GO:0048763	12	0.0162145	2.82221	5	8	2671	12061	Eaff20005-RA,Egulf05093-RA,Eaff11833-RA,Eaffi04288-RA,Eaffi04286-RA,
Molecular function	8-oxo-dGDP phosphatase activity	GO:0044715	8	0.0162145	2.82221	5	8	2671	12061	Eaff13894-RA,Egulf05215-RA,Eaffi04423-RA,Eaff19741-RA,Egulf02484-RA,
Molecular function	1-phosphatidylinositol-4-phosphate 5-kinase activity	GO:0016308	7	0.0162145	2.82221	5	8	2671	12061	Egulf11560-RA,Eaff05143-RA,Eaff03650-RA,Eaffi17484-RA,Eaffi13620-RA,
Molecular function	copper-dependent protein binding	GO:0032767	4	0.0162145	2.82221	5	8	2671	12061	Eaffi13587-RA,Egulf11522-RA,Eaffi01858-RA,Eaff05116-RA,Egulf07865-RA,
Molecular function	ATP binding	GO:0005524	9	0.0171446	1.17222	142	547	2671	12061	Egulf20802-RA,Eaff12123-RA,Eaff07804-RA,Eaff14623-RA,Eaff17998-RA,Eaff16419-RA,Egulf21488-RA,Eaff07714-RA,Egulf21938-RA,Egulf11514-RA,Egulf19787-RA,Eaffi11711-RA,Egulf20135-RA,Eaffi15323-RA,Eaffi13587-RA,Egulf18406-RA,Eaffi20651-RA,Eaff20005-RA,Eaffi01694-RA,Eaffi21837-RA,Egulf03699-RA,Egulf00032-RA,Egulf19943-RA,Eaffi03890-RA,Eaff17002-RA,Eaffi05864-RA,Eaff10704-RA,Eaff19987-RA,Egulf09489-RA,Eaf…
Molecular function	chitin binding	GO:0008061	4	0.0173396	1.5844	20	57	2671	12061	Eaff12745-RA,Eaff15702-RA,Eaffi18448-RA,Eaff16547-RA,Egulf14348-RA,Eaffi18449-RA,Eaff02058-RA,Eaffi03098-RA,Egulf14260-RA,Eaff12269-RA,Eaff15698-RA,Egulf14349-RA,Egulf04012-RA,Eaff15607-RA,Egulf20632-RA,Egulf04574-RA,Egulf14347-RA,Eaff15701-RA,Egulf13405-RA,Egulf08649-RA,
Molecular function	ribosomal protein S6 kinase activity	GO:0004711	8	0.0192023	2.46302	6	11	2671	12061	Eaff19734-RA,Eaffi22654-RA,Egulf17818-RA,Eaffi08961-RA,Eaff14887-RA,Egulf00516-RA,
Molecular function	uridine kinase activity	GO:0004849	8	0.0192023	2.46302	6	11	2671	12061	Egulf02339-RA,Eaff09933-RA,Egulf02337-RA,Egulf02338-RA,Eaff14015-RA,Eaff05033-RA,
Cellular component	myosin filament	GO:0032982	6	0	4.44124	50	53	2737	12885	Egulf18131-RA,Eaff17998-RA,Eaffi19653-RA,Eaffi12832-RA,Eaff13293-RA,Egulf07727-RA,Eaffi12946-RA,Eaffi15418-RA,Eaff02890-RA,Eaffi23121-RA,Egulf00432-RA,Eaffi21583-RA,Eaffi15214-RA,Eaffi02248-RA,Eaffi24006-RA,Eaffi12661-RA,Eaff04392-RA,Egulf20022-RA,Egulf20214-RA,Eaffi04589-RA,Eaffi13100-RA,Eaffi13522-RA,Eaffi09054-RA,Eaffi23123-RA,Egulf11145-RA,Egulf11811-RA,Eaffi15419-RA,Eaff04775-RA,Eaffi14160-R…
Cellular component	cell periphery	GO:0071944	3	0	1.27329	1034	3823	2737	12885	Eaffi21345-RA,Eaff06489-RA,Egulf20802-RA,Eaff15515-RA,Eaff09079-RA,Eaff09080-RA,Egulf21337-RA,Eaffi04572-RA,Eaff07460-RA,Eaff01338-RA,Eaffi07939-RA,Egulf06159-RA,Eaffi16694-RA,Eaffi08361-RA,Eaff11931-RA,Eaff17478-RA,Eaffi09126-RA,Eaffi08922-RA,Egulf16993-RA,Egulf13360-RA,Eaffi06167-RA,Eaff10158-RA,Egulf09425-RA,Eaff04284-RA,Eaffi15139-RA,Eaffi18953-RA,Eaff15732-RA,Eaff19521-RA,Eaffi06179-RA,Eaff1…
Cellular component	A band	GO:0031672	3	0	2.45092	101	194	2737	12885	Eaff11931-RA,Egulf18131-RA,Eaffi19653-RA,Eaffi12832-RA,Eaff13293-RA,Egulf07727-RA,Eaffi12946-RA,Eaff11639-RA,Eaff19058-RA,Eaff02890-RA,Eaffi05569-RA,Eaff09656-RA,Eaffi23121-RA,Egulf22344-RA,Eaffi14578-RA,Egulf00432-RA,Eaffi02849-RA,Egulf10712-RA,Eaff20005-RA,Eaffi21583-RA,Eaffi15214-RA,Eaff17002-RA,Eaffi02248-RA,Egulf16403-RA,Egulf13034-RA,Egulf17545-RA,Eaffi24006-RA,Eaffi12661-RA,Egulf02838-RA,E…
Cellular component	striated muscle myosin thick filament	GO:0005863	7	0	4.70771	47	47	2737	12885	Egulf18131-RA,Eaffi19653-RA,Eaffi12832-RA,Eaff13293-RA,Egulf07727-RA,Eaffi12946-RA,Eaffi15418-RA,Eaff02890-RA,Eaffi23121-RA,Egulf00432-RA,Eaffi21583-RA,Eaffi15214-RA,Eaffi02248-RA,Eaffi24006-RA,Eaffi12661-RA,Eaff04392-RA,Egulf20022-RA,Egulf20214-RA,Eaffi04589-RA,Eaffi13100-RA,Eaffi13522-RA,Eaffi09054-RA,Eaffi23123-RA,Egulf11145-RA,Egulf11811-RA,Eaffi15419-RA,Eaff04775-RA,Eaffi14160-RA,Eaffi13883-…
Cellular component	neuron projection membrane	GO:0032589	6	0	3.18088	75	111	2737	12885	Eaff06489-RA,Egulf13360-RA,Egulf09425-RA,Eaff11639-RA,Egulf07470-RA,Eaff13502-RA,Eaff16598-RA,Eaff16787-RA,Eaff02324-RA,Eaff01648-RA,Eaffi01328-RA,Egulf13623-RA,Eaff13349-RA,Eaff07643-RA,Egulf10849-RA,Egulf18192-RA,Egulf22296-RA,Eaffi18104-RA,Egulf19242-RA,Egulf14970-RA,Egulf02856-RA,Eaff10566-RA,Egulf04030-RA,Eaffi15959-RA,Egulf18239-RA,Egulf11685-RA,Eaff01292-RA,Egulf08386-RA,Eaff09795-RA,Egulf…
Cellular component	myofibril	GO:0030016	7	1.11022e-16	1.87861	168	421	2737	12885	Eaffi21345-RA,Eaff11931-RA,Egulf18131-RA,Eaff14226-RA,Eaff17998-RA,Eaffi19653-RA,Eaffi12832-RA,Eaff13293-RA,Egulf21488-RA,Egulf07727-RA,Eaffi12946-RA,Eaffi15418-RA,Eaff17680-RA,Eaffi23452-RA,Eaff11639-RA,Eaff19058-RA,Eaff02890-RA,Eaffi05569-RA,Eaff09656-RA,Eaffi23121-RA,Egulf11514-RA,Egulf22344-RA,Eaffi14578-RA,Egulf00432-RA,Eaffi02849-RA,Egulf10712-RA,Eaff20005-RA,Egulf07071-RA,Eaffi21583-RA,Egu…
Cellular component	obsolete intrinsic component of plasma membrane	GO:0031226	0	2.22045e-16	1.57185	401	1201	2737	12885	Eaff06489-RA,Egulf20802-RA,Eaff07460-RA,Eaff01338-RA,Eaffi16694-RA,Eaff17478-RA,Egulf13360-RA,Eaff10158-RA,Egulf09425-RA,Eaff10707-RA,Eaff16534-RA,Eaff07128-RA,Egulf11154-RA,Eaff04677-RA,Eaff18894-RA,Eaff09690-RA,Eaffi00389-RA,Egulf02334-RA,Eaff16419-RA,Eaff07423-RA,Eaff10384-RA,Eaff16308-RA,Eaff11639-RA,Eaff03216-RA,Egulf21938-RA,Egulf07470-RA,Egulf10934-RA,Egulf06466-RA,Eaff02648-RA,Eaff16598-R…
Cellular component	obsolete plasma membrane part	GO:0044459	0	2.22045e-16	1.34177	641	2249	2737	12885	Eaff06489-RA,Egulf20802-RA,Eaff09079-RA,Eaff09080-RA,Egulf21337-RA,Eaffi04572-RA,Eaff07460-RA,Eaff01338-RA,Eaffi07939-RA,Egulf06159-RA,Eaffi16694-RA,Eaff17478-RA,Eaffi09126-RA,Eaffi08922-RA,Egulf13360-RA,Eaffi06167-RA,Eaff10158-RA,Egulf09425-RA,Eaffi18953-RA,Eaff10707-RA,Eaff09398-RA,Eaff16534-RA,Eaff07128-RA,Egulf11154-RA,Eaff17998-RA,Eaff04677-RA,Eaff18894-RA,Eaff09690-RA,Eaffi00389-RA,Eaffi147…
Cellular component	sodium:potassium-exchanging ATPase complex	GO:0005890	7	2.22045e-16	4.70771	30	30	2737	12885	Egulf21938-RA,Egulf18406-RA,Eaffi21837-RA,Eaffi05864-RA,Eaff19987-RA,Egulf07745-RA,Eaffi07240-RA,Eaffi18038-RA,Egulf18400-RA,Eaff09762-RA,Egulf04479-RA,Eaff09487-RA,Eaff12348-RA,Eaff05782-RA,Eaff18149-RA,Eaff16080-RA,Egulf18126-RA,Eaff01559-RA,Egulf18367-RA,Eaff09732-RA,Egulf15768-RA,Egulf01323-RA,Egulf09502-RA,Eaff09765-RA,Egulf14045-RA,Egulf18404-RA,Egulf19507-RA,Eaff08954-RA,Eaffi23876-RA,Eaff…
Cellular component	myosin II complex	GO:0016460	4	3.33067e-16	4.00791	63	74	2737	12885	Egulf18131-RA,Eaff17998-RA,Eaffi19653-RA,Eaffi12832-RA,Eaff13293-RA,Egulf07727-RA,Eaffi12946-RA,Eaffi15418-RA,Eaffi23452-RA,Eaff02890-RA,Eaffi05569-RA,Eaff09656-RA,Eaffi23121-RA,Egulf00432-RA,Eaffi02849-RA,Eaffi21583-RA,Eaffi15214-RA,Eaffi02248-RA,Eaffi24006-RA,Eaffi12661-RA,Eaff04392-RA,Egulf20022-RA,Egulf20214-RA,Eaff06505-RA,Egulf18288-RA,Eaffi04589-RA,Eaffi13100-RA,Eaffi13522-RA,Egulf07430-RA…
Cellular component	obsolete intrinsic component of membrane	GO:0031224	0	3.33067e-16	1.34218	599	2101	2737	12885	Eaffi21906-RA,Eaff06489-RA,Egulf20802-RA,Eaff15515-RA,Eaffi04572-RA,Eaff07460-RA,Eaff01338-RA,Eaffi16694-RA,Eaff17478-RA,Egulf13360-RA,Eaffi06167-RA,Eaff10158-RA,Egulf09425-RA,Eaffi15139-RA,Eaff10707-RA,Eaff16534-RA,Eaff07128-RA,Egulf11154-RA,Eaff04677-RA,Eaff18894-RA,Eaff09690-RA,Eaffi00389-RA,Egulf02334-RA,Eaff16419-RA,Eaff07423-RA,Eaff10384-RA,Eaff16308-RA,Eaff10441-RA,Eaff11639-RA,Eaff03216-R…
Cellular component	myofilament	GO:0036379	3	3.33067e-16	3.70732	63	80	2737	12885	Egulf18131-RA,Eaffi19653-RA,Eaffi12832-RA,Eaff13293-RA,Egulf07727-RA,Eaffi12946-RA,Eaffi15418-RA,Eaff17680-RA,Eaff02890-RA,Eaffi23121-RA,Egulf00432-RA,Eaffi02849-RA,Eaffi21583-RA,Eaffi15214-RA,Eaffi02248-RA,Eaff12184-RA,Eaffi24006-RA,Eaffi12661-RA,Eaff04392-RA,Eaff16646-RA,Egulf13362-RA,Egulf20022-RA,Egulf20214-RA,Eaffi04589-RA,Eaffi13100-RA,Eaffi13522-RA,Eaffi02034-RA,Eaffi09054-RA,Egulf04685-RA…
Cellular component	polytene chromosome puff	GO:0005703	4	3.33067e-16	2.77303	86	146	2737	12885	Egulf18131-RA,Eaff14062-RA,Eaffi19653-RA,Eaffi12832-RA,Eaff13293-RA,Egulf07727-RA,Eaffi12946-RA,Eaff19058-RA,Eaff02890-RA,Eaffi23121-RA,Eaffi14436-RA,Eaffi16011-RA,Egulf02290-RA,Egulf00432-RA,Egulf02289-RA,Eaff13403-RA,Eaffi12190-RA,Eaffi21583-RA,Eaffi15214-RA,Eaffi02248-RA,Egulf16403-RA,Eaffi13904-RA,Eaffi24006-RA,Egulf06558-RA,Eaffi12661-RA,Eaff04392-RA,Eaffi00536-RA,Egulf20022-RA,Eaffi19879-RA…
Cellular component	muscle myosin complex	GO:0005859	5	3.33067e-16	4.00791	63	74	2737	12885	Egulf18131-RA,Eaff17998-RA,Eaffi19653-RA,Eaffi12832-RA,Eaff13293-RA,Egulf07727-RA,Eaffi12946-RA,Eaffi15418-RA,Eaffi23452-RA,Eaff02890-RA,Eaffi05569-RA,Eaff09656-RA,Eaffi23121-RA,Egulf00432-RA,Eaffi02849-RA,Eaffi21583-RA,Eaffi15214-RA,Eaffi02248-RA,Eaffi24006-RA,Eaffi12661-RA,Eaff04392-RA,Egulf20022-RA,Egulf20214-RA,Eaff06505-RA,Egulf18288-RA,Eaffi04589-RA,Eaffi13100-RA,Eaffi13522-RA,Egulf07430-RA…
Cellular component	plasma membrane	GO:0005886	4	3.33067e-16	1.27526	950	3507	2737	12885	Eaffi21345-RA,Eaff06489-RA,Egulf20802-RA,Eaff15515-RA,Eaff09079-RA,Eaff09080-RA,Egulf21337-RA,Eaffi04572-RA,Eaff07460-RA,Eaff01338-RA,Eaffi07939-RA,Egulf06159-RA,Eaffi16694-RA,Eaffi08361-RA,Eaff11931-RA,Eaff17478-RA,Eaffi09126-RA,Eaffi08922-RA,Egulf16993-RA,Egulf13360-RA,Eaffi06167-RA,Eaff10158-RA,Egulf09425-RA,Eaff04284-RA,Eaffi15139-RA,Eaffi18953-RA,Eaff15732-RA,Eaff19521-RA,Eaffi06179-RA,Eaff1…
Cellular component	transmembrane transporter complex	GO:1902495	4	3.33067e-16	2.31907	200	406	2737	12885	Eaff06489-RA,Egulf13360-RA,Eaffi06167-RA,Eaff10158-RA,Egulf09425-RA,Eaffi00389-RA,Egulf02334-RA,Eaff16308-RA,Egulf21938-RA,Eaff04805-RA,Eaffi20233-RA,Egulf10934-RA,Eaff16598-RA,Eaffi16810-RA,Eaff02324-RA,Eaff11087-RA,Egulf00537-RA,Egulf15931-RA,Eaff03120-RA,Egulf13623-RA,Egulf18406-RA,Eaff20005-RA,Egulf16606-RA,Eaffi21837-RA,Eaff13349-RA,Eaffi19291-RA,Eaff04968-RA,Eaffi05864-RA,Eaff18674-RA,Egulf…
Cellular component	myosin complex	GO:0016459	3	4.44089e-16	3.89737	101	122	2737	12885	Egulf18131-RA,Eaffi18953-RA,Eaff17998-RA,Eaffi19653-RA,Eaffi12832-RA,Eaff13293-RA,Egulf21488-RA,Egulf07727-RA,Eaffi12946-RA,Eaffi15418-RA,Eaffi23452-RA,Eaff02890-RA,Eaffi05569-RA,Eaff09656-RA,Eaffi23121-RA,Egulf11514-RA,Egulf00432-RA,Eaffi02849-RA,Eaffi08671-RA,Eaffi21583-RA,Eaffi15214-RA,Eaff15663-RA,Eaffi02248-RA,Eaff04083-RA,Egulf14314-RA,Eaffi24006-RA,Eaffi12661-RA,Eaffi17624-RA,Egulf21483-RA…
Cellular component	actin cytoskeleton	GO:0015629	7	4.44089e-16	1.98359	225	534	2737	12885	Eaffi21345-RA,Egulf18131-RA,Eaffi18953-RA,Eaff08581-RA,Eaff14226-RA,Eaff17998-RA,Egulf14305-RA,Egulf15820-RA,Eaffi19653-RA,Eaff16419-RA,Eaffi12832-RA,Eaff13293-RA,Egulf21488-RA,Egulf07727-RA,Egulf14468-RA,Eaffi12946-RA,Eaffi15418-RA,Eaff17680-RA,Eaffi23452-RA,Eaff19058-RA,Eaff02890-RA,Eaffi05569-RA,Eaff09656-RA,Eaff10212-RA,Eaffi23121-RA,Egulf05014-RA,Egulf11514-RA,Eaff12603-RA,Egulf00432-RA,Eaff…
Cellular component	cation channel complex	GO:0034703	6	4.44089e-16	2.57803	115	210	2737	12885	Eaff06489-RA,Egulf13360-RA,Eaffi06167-RA,Egulf09425-RA,Egulf02334-RA,Eaff16308-RA,Eaffi20233-RA,Eaff16598-RA,Eaffi16810-RA,Eaff02324-RA,Eaff11087-RA,Egulf00537-RA,Eaff03120-RA,Egulf13623-RA,Eaff20005-RA,Egulf16606-RA,Eaff13349-RA,Eaff12371-RA,Eaff12943-RA,Eaff12671-RA,Egulf09416-RA,Eaff19403-RA,Egulf18099-RA,Egulf19307-RA,Eaffi18104-RA,Egulf19094-RA,Eaff15766-RA,Egulf14970-RA,Egulf09620-RA,Eaff01…
Cellular component	obsolete synapse part	GO:0044456	0	5.55112e-16	1.49752	348	1094	2737	12885	Eaff06489-RA,Eaff09079-RA,Eaff09080-RA,Egulf21337-RA,Eaffi04572-RA,Eaff01338-RA,Eaffi07939-RA,Eaffi09126-RA,Eaffi08922-RA,Egulf13360-RA,Eaffi23551-RA,Eaff00291-RA,Eaff10158-RA,Egulf09425-RA,Eaffi06041-RA,Eaff17998-RA,Egulf14305-RA,Eaff18894-RA,Egulf16154-RA,Egulf18372-RA,Eaff18129-RA,Eaff19734-RA,Eaffi12423-RA,Eaff11639-RA,Egulf21938-RA,Egulf07470-RA,Eaff16264-RA,Eaff12097-RA,Eaff13502-RA,Egulf10…
Cellular component	gap junction	GO:0005921	6	5.55112e-16	4.03518	30	35	2737	12885	Eaffi09126-RA,Egulf04654-RA,Eaffi03766-RA,Eaff12204-RA,Egulf17966-RA,Egulf05598-RA,Eaff08079-RA,Eaff12203-RA,Egulf05945-RA,Egulf11353-RA,Eaff17232-RA,Eaff03321-RA,Eaffi05274-RA,Eaff14985-RA,Eaff08081-RA,Eaff12200-RA,Eaff16467-RA,Eaff11103-RA,Eaffi13415-RA,Egulf00376-RA,Egulf05949-RA,Egulf05597-RA,Eaff14984-RA,Egulf00373-RA,Eaffi05782-RA,Egulf21680-RA,Eaff11110-RA,Eaff04966-RA,Egulf18332-RA,Egulf0…
Cellular component	ion channel complex	GO:0034702	5	5.55112e-16	2.50043	145	273	2737	12885	Eaff06489-RA,Egulf13360-RA,Eaffi06167-RA,Eaff10158-RA,Egulf09425-RA,Egulf02334-RA,Eaff16308-RA,Eaffi20233-RA,Egulf10934-RA,Eaff16598-RA,Eaffi16810-RA,Eaff02324-RA,Eaff11087-RA,Egulf00537-RA,Eaff03120-RA,Egulf13623-RA,Eaff20005-RA,Egulf16606-RA,Eaff13349-RA,Eaff04968-RA,Egulf02145-RA,Egulf01899-RA,Eaff12371-RA,Eaff12943-RA,Eaffi13417-RA,Eaff12671-RA,Egulf09416-RA,Egulf18192-RA,Eaff19403-RA,Egulf18…
Cellular component	supramolecular polymer	GO:0099081	4	7.77156e-16	1.60452	288	845	2737	12885	Eaffi21345-RA,Eaff11931-RA,Egulf16993-RA,Egulf18131-RA,Eaffi18953-RA,Eaff19521-RA,Egulf01364-RA,Eaff14226-RA,Eaff17998-RA,Egulf15820-RA,Eaffi19653-RA,Eaffi12832-RA,Eaff13293-RA,Egulf21488-RA,Egulf07727-RA,Egulf14468-RA,Eaffi12946-RA,Eaffi11171-RA,Eaffi15418-RA,Eaff17680-RA,Eaffi23452-RA,Eaff11639-RA,Eaff19058-RA,Eaff02890-RA,Eaffi05569-RA,Eaff09656-RA,Eaff10212-RA,Eaffi23121-RA,Eaff05180-RA,Eaff1…
Cellular component	supramolecular fiber	GO:0099512	5	7.77156e-16	1.60452	288	845	2737	12885	Eaffi21345-RA,Eaff11931-RA,Egulf16993-RA,Egulf18131-RA,Eaffi18953-RA,Eaff19521-RA,Egulf01364-RA,Eaff14226-RA,Eaff17998-RA,Egulf15820-RA,Eaffi19653-RA,Eaffi12832-RA,Eaff13293-RA,Egulf21488-RA,Egulf07727-RA,Egulf14468-RA,Eaffi12946-RA,Eaffi11171-RA,Eaffi15418-RA,Eaff17680-RA,Eaffi23452-RA,Eaff11639-RA,Eaff19058-RA,Eaff02890-RA,Eaffi05569-RA,Eaff09656-RA,Eaff10212-RA,Eaffi23121-RA,Eaff05180-RA,Eaff1…
Cellular component	sarcomere	GO:0030017	3	7.77156e-16	1.93774	156	379	2737	12885	Eaffi21345-RA,Eaff11931-RA,Egulf18131-RA,Eaff17998-RA,Eaffi19653-RA,Eaffi12832-RA,Eaff13293-RA,Egulf21488-RA,Egulf07727-RA,Eaffi12946-RA,Eaffi15418-RA,Eaff17680-RA,Eaffi23452-RA,Eaff11639-RA,Eaff19058-RA,Eaff02890-RA,Eaffi05569-RA,Eaff09656-RA,Eaffi23121-RA,Egulf11514-RA,Egulf22344-RA,Eaffi14578-RA,Egulf00432-RA,Eaffi02849-RA,Egulf10712-RA,Eaff20005-RA,Egulf07071-RA,Eaffi21583-RA,Egulf07505-RA,Ea…
Cellular component	transporter complex	GO:1990351	3	7.77156e-16	2.26878	200	415	2737	12885	Eaff06489-RA,Egulf13360-RA,Eaffi06167-RA,Eaff10158-RA,Egulf09425-RA,Eaffi00389-RA,Egulf02334-RA,Eaff16308-RA,Egulf21938-RA,Eaff04805-RA,Eaffi20233-RA,Egulf10934-RA,Eaff16598-RA,Eaffi16810-RA,Eaff02324-RA,Eaff11087-RA,Egulf00537-RA,Egulf15931-RA,Eaff03120-RA,Egulf13623-RA,Egulf18406-RA,Eaff20005-RA,Egulf16606-RA,Eaffi21837-RA,Eaff13349-RA,Eaffi19291-RA,Eaff04968-RA,Eaffi05864-RA,Eaff18674-RA,Egulf…
Cellular component	postsynapse	GO:0098794	3	8.88178e-16	1.66546	225	636	2737	12885	Egulf21337-RA,Eaff01338-RA,Eaffi09126-RA,Eaffi08922-RA,Egulf13360-RA,Eaff00291-RA,Eaff10158-RA,Egulf09425-RA,Eaffi06041-RA,Eaff17998-RA,Egulf14305-RA,Egulf18372-RA,Eaff18129-RA,Eaff11639-RA,Egulf21938-RA,Egulf07470-RA,Eaff16264-RA,Eaff13502-RA,Egulf10934-RA,Egulf05014-RA,Eaff16598-RA,Eaff16787-RA,Eaffi04076-RA,Eaff02324-RA,Eaffi01840-RA,Egulf19416-RA,Egulf18545-RA,Eaff01648-RA,Egulf15955-RA,Eaff1…
Cellular component	cell junction	GO:0030054	3	1.33227e-15	1.36017	553	1914	2737	12885	Eaffi21345-RA,Eaff06489-RA,Egulf20802-RA,Eaff09079-RA,Eaff09080-RA,Egulf21337-RA,Eaffi04572-RA,Eaff01338-RA,Egulf01708-RA,Eaffi07939-RA,Eaffi09126-RA,Eaffi08922-RA,Egulf13360-RA,Egulf15541-RA,Eaffi23551-RA,Eaff00291-RA,Eaff10158-RA,Egulf09425-RA,Eaff12454-RA,Eaffi18953-RA,Egulf04654-RA,Eaff16534-RA,Eaffi06041-RA,Eaff17998-RA,Egulf14305-RA,Egulf15820-RA,Eaff18894-RA,Eaffi00389-RA,Egulf16154-RA,Eaf…
Cellular component	plasma membrane protein complex	GO:0098797	4	2.44249e-15	1.67577	194	545	2737	12885	Eaff06489-RA,Egulf20802-RA,Egulf13360-RA,Eaffi06167-RA,Eaff10158-RA,Egulf09425-RA,Eaffi00389-RA,Eaff16308-RA,Eaff11639-RA,Egulf21938-RA,Eaffi20233-RA,Egulf10934-RA,Eaff16598-RA,Eaff02324-RA,Eaffi01410-RA,Eaff11087-RA,Eaff09599-RA,Egulf00537-RA,Eaff03120-RA,Egulf13623-RA,Egulf18406-RA,Eaff20005-RA,Eaffi21837-RA,Eaff13349-RA,Eaffi19291-RA,Eaff04968-RA,Eaffi05864-RA,Egulf02145-RA,Egulf01899-RA,Eaff1…
Cellular component	leading edge membrane	GO:0031256	3	4.44089e-15	2.12968	95	210	2737	12885	Eaff06489-RA,Egulf13360-RA,Egulf09425-RA,Eaffi18953-RA,Eaff11639-RA,Egulf07470-RA,Eaff13502-RA,Eaff16598-RA,Eaff16787-RA,Eaffi04076-RA,Eaff02324-RA,Eaffi08671-RA,Eaff01648-RA,Eaffi01328-RA,Egulf13623-RA,Eaff13349-RA,Eaff15663-RA,Eaff07643-RA,Egulf14314-RA,Egulf10849-RA,Egulf18192-RA,Egulf22296-RA,Eaffi08670-RA,Eaffi18104-RA,Egulf19242-RA,Egulf14970-RA,Egulf02856-RA,Eaff10566-RA,Egulf04030-RA,Eaff…
Cellular component	obsolete contractile fiber part	GO:0044449	0	6.32827e-15	1.77392	156	414	2737	12885	Eaffi21345-RA,Eaff11931-RA,Egulf18131-RA,Eaff17998-RA,Eaffi19653-RA,Eaffi12832-RA,Eaff13293-RA,Egulf21488-RA,Egulf07727-RA,Eaffi12946-RA,Eaffi15418-RA,Eaff17680-RA,Eaffi23452-RA,Eaff11639-RA,Eaff19058-RA,Eaff02890-RA,Eaffi05569-RA,Eaff09656-RA,Eaffi23121-RA,Egulf11514-RA,Egulf22344-RA,Eaffi14578-RA,Egulf00432-RA,Eaffi02849-RA,Egulf10712-RA,Eaff20005-RA,Egulf07071-RA,Eaffi21583-RA,Egulf07505-RA,Ea…
Cellular component	contractile fiber	GO:0043292	6	7.77156e-15	1.73062	168	457	2737	12885	Eaffi21345-RA,Eaff11931-RA,Egulf18131-RA,Eaff14226-RA,Eaff17998-RA,Eaffi19653-RA,Eaffi12832-RA,Eaff13293-RA,Egulf21488-RA,Egulf07727-RA,Eaffi12946-RA,Eaffi15418-RA,Eaff17680-RA,Eaffi23452-RA,Eaff11639-RA,Eaff19058-RA,Eaff02890-RA,Eaffi05569-RA,Eaff09656-RA,Eaffi23121-RA,Egulf11514-RA,Egulf22344-RA,Eaffi14578-RA,Egulf00432-RA,Eaffi02849-RA,Egulf10712-RA,Eaff20005-RA,Egulf07071-RA,Eaffi21583-RA,Egu…
Cellular component	postsynaptic membrane	GO:0045211	6	1.16573e-14	1.97938	111	264	2737	12885	Eaff01338-RA,Eaffi09126-RA,Egulf13360-RA,Eaff10158-RA,Egulf09425-RA,Egulf18372-RA,Egulf07470-RA,Eaff13502-RA,Egulf10934-RA,Eaff16598-RA,Eaff16787-RA,Eaffi04076-RA,Eaff02324-RA,Eaffi01840-RA,Eaff01648-RA,Eaffi01328-RA,Eaff03120-RA,Eaff14179-RA,Eaff13349-RA,Eaff04968-RA,Egulf04927-RA,Eaff09736-RA,Egulf02145-RA,Egulf01899-RA,Eaff08079-RA,Eaffi13417-RA,Egulf09416-RA,Egulf10849-RA,Eaff03814-RA,Egulf18…
Cellular component	neuronal cell body membrane	GO:0032809	4	1.77636e-14	2.70443	54	94	2737	12885	Egulf09425-RA,Egulf21938-RA,Egulf07470-RA,Eaff13502-RA,Eaff16787-RA,Eaff02324-RA,Eaff01648-RA,Eaffi01328-RA,Egulf18406-RA,Eaff13349-RA,Eaffi05864-RA,Eaff07643-RA,Eaff19987-RA,Egulf07745-RA,Eaffi07240-RA,Egulf10849-RA,Eaff19403-RA,Eaffi18104-RA,Eaffi18038-RA,Egulf14970-RA,Egulf02856-RA,Egulf18400-RA,Eaff09762-RA,Egulf11685-RA,Eaff01292-RA,Egulf08386-RA,Egulf04479-RA,Eaff12348-RA,Egulf19251-RA,Eaff…
Cellular component	cell body membrane	GO:0044298	3	1.77636e-14	2.70443	54	94	2737	12885	Egulf09425-RA,Egulf21938-RA,Egulf07470-RA,Eaff13502-RA,Eaff16787-RA,Eaff02324-RA,Eaff01648-RA,Eaffi01328-RA,Egulf18406-RA,Eaff13349-RA,Eaffi05864-RA,Eaff07643-RA,Eaff19987-RA,Egulf07745-RA,Eaffi07240-RA,Egulf10849-RA,Eaff19403-RA,Eaffi18104-RA,Eaffi18038-RA,Egulf14970-RA,Egulf02856-RA,Egulf18400-RA,Eaff09762-RA,Egulf11685-RA,Eaff01292-RA,Egulf08386-RA,Egulf04479-RA,Eaff12348-RA,Egulf19251-RA,Eaff…
Cellular component	neuronal cell body	GO:0043025	4	1.87628e-14	1.44717	328	1067	2737	12885	Eaffi21345-RA,Eaff06489-RA,Egulf21337-RA,Eaff01338-RA,Eaffi09126-RA,Egulf13360-RA,Eaff00291-RA,Eaff10158-RA,Egulf09425-RA,Eaffi18953-RA,Eaffi06041-RA,Eaff17998-RA,Eaff10384-RA,Eaff03916-RA,Eaff11639-RA,Egulf21938-RA,Egulf07470-RA,Eaff10212-RA,Eaff13502-RA,Eaffi16011-RA,Egulf10934-RA,Egulf05014-RA,Egulf07916-RA,Eaff16598-RA,Eaff16787-RA,Eaffi04076-RA,Eaffi16810-RA,Eaff02324-RA,Eaffi01840-RA,Egulf1…
Cellular component	dendrite membrane	GO:0032590	7	3.9968e-14	3.28651	37	53	2737	12885	Egulf13360-RA,Egulf09425-RA,Eaff11639-RA,Egulf07470-RA,Eaff16598-RA,Eaff02324-RA,Eaff01648-RA,Eaffi01328-RA,Eaff13349-RA,Eaff07643-RA,Eaffi18104-RA,Egulf14970-RA,Egulf04030-RA,Eaffi15959-RA,Eaff01292-RA,Egulf08386-RA,Egulf19251-RA,Eaff03131-RA,Egulf20678-RA,Egulf04523-RA,Egulf05346-RA,Eaffi03115-RA,Egulf01081-RA,Eaffi04579-RA,Eaffi09942-RA,Eaff16597-RA,Eaff07012-RA,Egulf16856-RA,Eaff12309-RA,Egul…
Cellular component	cation-transporting ATPase complex	GO:0090533	6	4.62963e-14	3.71661	30	38	2737	12885	Egulf21938-RA,Egulf18406-RA,Eaffi21837-RA,Eaffi05864-RA,Eaff19987-RA,Egulf07745-RA,Eaffi07240-RA,Eaffi18038-RA,Egulf18400-RA,Eaff09762-RA,Egulf04479-RA,Eaff09487-RA,Eaff12348-RA,Eaff05782-RA,Eaff18149-RA,Eaff16080-RA,Egulf18126-RA,Eaff01559-RA,Egulf18367-RA,Eaff09732-RA,Egulf15768-RA,Egulf01323-RA,Egulf09502-RA,Eaff09765-RA,Egulf14045-RA,Egulf18404-RA,Egulf19507-RA,Eaff08954-RA,Eaffi23876-RA,Eaff…
Cellular component	ATPase dependent transmembrane transport complex	GO:0098533	5	5.71765e-14	3.16553	39	58	2737	12885	Eaffi00389-RA,Egulf21938-RA,Egulf18406-RA,Eaffi21837-RA,Eaffi19291-RA,Eaffi05864-RA,Eaff19987-RA,Eaffi19287-RA,Egulf07745-RA,Eaffi18218-RA,Eaffi07240-RA,Eaffi18038-RA,Egulf18400-RA,Eaff09762-RA,Eaff00400-RA,Egulf09324-RA,Egulf04479-RA,Eaff09487-RA,Eaff12348-RA,Eaff05782-RA,Egulf21992-RA,Eaff18149-RA,Eaff16080-RA,Egulf18126-RA,Eaff01559-RA,Eaff03044-RA,Egulf18367-RA,Eaff09732-RA,Egulf15768-RA,Egul…
Cellular component	cell-cell junction	GO:0005911	5	7.4607e-14	1.5354	242	742	2737	12885	Eaffi21345-RA,Egulf20802-RA,Eaff01338-RA,Egulf01708-RA,Eaffi09126-RA,Egulf15541-RA,Eaff12454-RA,Egulf04654-RA,Eaff16534-RA,Eaffi06041-RA,Eaff17998-RA,Egulf15820-RA,Eaffi00389-RA,Eaff11447-RA,Eaff16419-RA,Eaffi10737-RA,Egulf14468-RA,Eaffi13736-RA,Eaffi11171-RA,Eaff04817-RA,Eaffi23452-RA,Eaff11639-RA,Egulf21938-RA,Eaff15109-RA,Egulf07916-RA,Eaffi01840-RA,Eaff09599-RA,Eaff00651-RA,Eaffi03766-RA,Eaff…
Cellular component	anchoring junction	GO:0070161	4	7.67164e-14	1.53348	243	746	2737	12885	Eaffi21345-RA,Egulf20802-RA,Eaff01338-RA,Egulf01708-RA,Eaffi09126-RA,Egulf15541-RA,Eaff12454-RA,Egulf04654-RA,Eaff16534-RA,Eaffi06041-RA,Eaff17998-RA,Egulf15820-RA,Eaffi00389-RA,Eaff11447-RA,Eaff16419-RA,Eaffi10737-RA,Egulf14468-RA,Eaffi13736-RA,Eaffi11171-RA,Eaff04817-RA,Eaffi23452-RA,Eaff11639-RA,Egulf21938-RA,Eaff15109-RA,Egulf07916-RA,Eaffi01840-RA,Eaff09599-RA,Eaff00651-RA,Eaffi03766-RA,Eaff…
Cellular component	dense body	GO:0097433	3	9.78106e-14	4.18463	24	27	2737	12885	Eaff12249-RA,Egulf15820-RA,Egulf14468-RA,Egulf18605-RA,Egulf04651-RA,Eaff12603-RA,Eaff04981-RA,Egulf00181-RA,Eaff18111-RA,Eaff09789-RA,Eaff17432-RA,Egulf00184-RA,Eaff15799-RA,Egulf12162-RA,Egulf20866-RA,Eaff12511-RA,Egulf04277-RA,Eaff19250-RA,Eaff20251-RA,Egulf04172-RA,Eaff12208-RA,Eaffi05893-RA,Eaff07159-RA,Egulf01390-RA,
Cellular component	synaptic membrane	GO:0097060	5	1.14131e-13	1.8004	135	353	2737	12885	Eaff06489-RA,Eaff09079-RA,Eaff09080-RA,Egulf21337-RA,Eaff01338-RA,Eaffi07939-RA,Eaffi09126-RA,Egulf13360-RA,Eaff10158-RA,Egulf09425-RA,Egulf18372-RA,Eaff11639-RA,Egulf07470-RA,Eaff13502-RA,Egulf10934-RA,Eaff16598-RA,Eaff16787-RA,Eaffi04076-RA,Eaff02324-RA,Eaffi01840-RA,Eaff01648-RA,Egulf22044-RA,Egulf15931-RA,Eaffi01328-RA,Eaff03120-RA,Eaff14179-RA,Eaff05681-RA,Egulf13623-RA,Eaff13349-RA,Eaff0496…
Cellular component	nephrocyte diaphragm	GO:0005917	7	6.37268e-13	3.92309	25	30	2737	12885	Eaff12454-RA,Eaffi10737-RA,Eaff15109-RA,Egulf04368-RA,Egulf05757-RA,Eaffi22802-RA,Eaff04875-RA,Egulf17476-RA,Egulf11251-RA,Eaffi10694-RA,Eaffi05147-RA,Eaff19996-RA,Eaffi10325-RA,Eaff15471-RA,Eaffi22798-RA,Eaff15291-RA,Egulf15713-RA,Egulf15672-RA,Egulf17680-RA,Egulf17333-RA,Eaff15107-RA,Eaff18217-RA,Egulf17324-RA,Egulf15895-RA,Eaff11283-RA,
Cellular component	voltage-gated calcium channel complex	GO:0005891	8	1.21114e-12	3.39393	31	43	2737	12885	Eaffi06167-RA,Eaffi20233-RA,Eaff11087-RA,Egulf00537-RA,Eaff20005-RA,Eaff12671-RA,Eaff15766-RA,Egulf05093-RA,Eaffi18296-RA,Egulf14908-RA,Eaffi05023-RA,Eaff08233-RA,Eaffi03176-RA,Eaff15736-RA,Eaff06204-RA,Egulf05959-RA,Egulf08312-RA,Eaffi08938-RA,Egulf18650-RA,Eaff17885-RA,Egulf14505-RA,Eaff11833-RA,Eaff09988-RA,Eaffi04288-RA,Eaffi20721-RA,Egulf05728-RA,Eaffi10354-RA,Egulf14503-RA,Eaffi04286-RA,Eaf…
Cellular component	plasma membrane region	GO:0098590	4	1.38589e-12	1.3553	397	1379	2737	12885	Eaff06489-RA,Egulf20802-RA,Eaff09079-RA,Eaff09080-RA,Egulf21337-RA,Eaffi04572-RA,Eaff07460-RA,Eaff01338-RA,Eaffi07939-RA,Egulf06159-RA,Eaff17478-RA,Eaffi09126-RA,Egulf13360-RA,Eaffi06167-RA,Eaff10158-RA,Egulf09425-RA,Eaffi18953-RA,Eaff17998-RA,Eaff09690-RA,Eaffi14783-RA,Eaff16419-RA,Egulf18372-RA,Eaffi13736-RA,Eaffi23452-RA,Eaff11639-RA,Egulf21938-RA,Egulf07470-RA,Eaffi20233-RA,Eaff12097-RA,Eaff1…
Cellular component	obsolete neuron part	GO:0097458	0	2.4668e-12	1.26419	594	2212	2737	12885	Eaffi21345-RA,Eaff06489-RA,Eaff09079-RA,Eaff09080-RA,Egulf21337-RA,Eaffi04572-RA,Eaff01338-RA,Eaffi07939-RA,Eaffi09126-RA,Eaffi08922-RA,Egulf13360-RA,Eaffi23551-RA,Eaff00291-RA,Eaff10158-RA,Egulf09425-RA,Eaff04284-RA,Eaffi18953-RA,Egulf01364-RA,Eaffi06041-RA,Eaff17998-RA,Egulf14305-RA,Eaff18894-RA,Eaff09690-RA,Egulf16154-RA,Eaff01084-RA,Eaff06515-RA,Egulf18372-RA,Eaff18129-RA,Eaff19734-RA,Egulf17…
Cellular component	cell body	GO:0044297	3	2.83451e-12	1.38896	339	1149	2737	12885	Eaffi21345-RA,Eaff06489-RA,Egulf21337-RA,Eaff01338-RA,Eaffi09126-RA,Egulf13360-RA,Eaff00291-RA,Eaff10158-RA,Egulf09425-RA,Eaffi18953-RA,Eaffi06041-RA,Eaff17998-RA,Eaff06515-RA,Eaff10384-RA,Eaff03916-RA,Eaff11639-RA,Egulf21938-RA,Egulf07470-RA,Eaff10212-RA,Eaff13502-RA,Eaffi16011-RA,Egulf10934-RA,Egulf05014-RA,Egulf07916-RA,Eaff16598-RA,Eaff16787-RA,Eaffi04076-RA,Eaffi16810-RA,Eaff02324-RA,Eaffi01…
Cellular component	synapse	GO:0045202	4	3.71381e-12	1.35731	380	1318	2737	12885	Eaff06489-RA,Eaff09079-RA,Eaff09080-RA,Egulf21337-RA,Eaffi04572-RA,Eaff01338-RA,Eaffi07939-RA,Eaffi09126-RA,Eaffi08922-RA,Egulf13360-RA,Eaffi23551-RA,Eaff00291-RA,Eaff10158-RA,Egulf09425-RA,Eaffi18953-RA,Eaffi06041-RA,Eaff17998-RA,Egulf14305-RA,Eaff18894-RA,Egulf16154-RA,Eaff01084-RA,Egulf18372-RA,Eaff18129-RA,Eaff19734-RA,Eaffi12423-RA,Eaff11639-RA,Egulf21938-RA,Egulf07470-RA,Eaff16264-RA,Eaff12…
Cellular component	supramolecular complex	GO:0099080	3	5.78215e-12	1.36799	358	1232	2737	12885	Eaffi21345-RA,Eaff12249-RA,Eaff11931-RA,Egulf16993-RA,Egulf18131-RA,Eaffi18953-RA,Eaff19521-RA,Egulf01364-RA,Eaff14226-RA,Eaff17998-RA,Egulf15820-RA,Eaffi19653-RA,Eaffi12832-RA,Eaff13293-RA,Egulf03251-RA,Egulf21488-RA,Egulf07727-RA,Egulf14468-RA,Eaffi12946-RA,Eaffi11171-RA,Eaffi15418-RA,Eaff17680-RA,Eaffi23452-RA,Eaff11639-RA,Eaff19058-RA,Egulf20429-RA,Eaff02890-RA,Eaffi05569-RA,Eaff12209-RA,Eaff…
Cellular component	germline ring canal	GO:0045172	4	6.17484e-12	2.95229	37	59	2737	12885	Eaffi18953-RA,Eaffi23452-RA,Eaffi08671-RA,Eaff15663-RA,Egulf14314-RA,Eaffi08670-RA,Eaff16081-RA,Eaffi24020-RA,Egulf08813-RA,Egulf07430-RA,Eaff02608-RA,Eaff20185-RA,Eaffi02509-RA,Eaff10921-RA,Eaff08446-RA,Eaff13121-RA,Egulf03183-RA,Egulf14044-RA,Eaffi01408-RA,Egulf16936-RA,Egulf03574-RA,Egulf17423-RA,Eaff01253-RA,Eaff15962-RA,Eaff13756-RA,Egulf19517-RA,Eaff19456-RA,Eaff10923-RA,Eaff19796-RA,Eaffi0…
Cellular component	lateral part of cell	GO:0097574	3	1.00578e-11	3.76617	24	30	2737	12885	Egulf21938-RA,Egulf18406-RA,Eaffi21837-RA,Eaffi05864-RA,Eaff19987-RA,Egulf07745-RA,Eaffi07240-RA,Eaff13671-RA,Eaffi18038-RA,Egulf18400-RA,Egulf02687-RA,Eaff09762-RA,Eaff13673-RA,Egulf04479-RA,Eaff12348-RA,Eaff05782-RA,Eaff01559-RA,Egulf09502-RA,Egulf02688-RA,Eaff09765-RA,Egulf18404-RA,Egulf19507-RA,Eaffi23876-RA,Eaffi01721-RA,
Cellular component	cytoskeleton	GO:0005856	6	1.10106e-11	1.28438	508	1862	2737	12885	Eaffi21345-RA,Egulf01045-RA,Egulf21337-RA,Eaff01580-RA,Egulf06159-RA,Eaff11931-RA,Egulf16993-RA,Egulf18131-RA,Eaff04284-RA,Eaffi18953-RA,Eaff08581-RA,Eaff19521-RA,Egulf01364-RA,Eaff09398-RA,Eaff14226-RA,Eaff14062-RA,Egulf01655-RA,Eaff17998-RA,Egulf14305-RA,Egulf15820-RA,Eaff00623-RA,Eaffi19653-RA,Eaff16419-RA,Eaffi12832-RA,Eaff13293-RA,Egulf03251-RA,Egulf21488-RA,Egulf07727-RA,Egulf14468-RA,Eaffi…
Cellular component	unconventional myosin complex	GO:0016461	4	3.14978e-11	3.56645	25	33	2737	12885	Eaffi18953-RA,Eaff17998-RA,Egulf21488-RA,Egulf11514-RA,Eaffi08671-RA,Eaff15663-RA,Egulf14314-RA,Egulf21483-RA,Eaffi08670-RA,Eaff10921-RA,Eaff08446-RA,Egulf08729-RA,Eaff20235-RA,Egulf19517-RA,Eaff10923-RA,Eaff06185-RA,Eaffi07254-RA,Eaffi10227-RA,Egulf19516-RA,Eaff06188-RA,Eaff10922-RA,Egulf19519-RA,Eaffi18954-RA,Egulf15056-RA,Egulf00743-RA,
Cellular component	cell leading edge	GO:0031252	3	4.50361e-11	1.57228	172	515	2737	12885	Eaff06489-RA,Egulf13360-RA,Egulf15541-RA,Egulf09425-RA,Eaffi18953-RA,Eaff10707-RA,Eaffi06041-RA,Eaff17998-RA,Eaff09911-RA,Egulf17362-RA,Eaffi13736-RA,Eaff04817-RA,Eaff11639-RA,Egulf07470-RA,Eaff13502-RA,Eaff16598-RA,Eaff16787-RA,Eaffi04076-RA,Eaff12475-RA,Eaff02324-RA,Eaffi08671-RA,Egulf18545-RA,Eaffi13587-RA,Eaff01648-RA,Egulf22044-RA,Eaffi01328-RA,Eaff05681-RA,Egulf13623-RA,Eaff13349-RA,Eaff156…
Cellular component	postsynaptic specialization	GO:0099572	4	8.87305e-11	1.68792	128	357	2737	12885	Egulf21337-RA,Eaffi08922-RA,Egulf13360-RA,Eaffi06041-RA,Egulf14305-RA,Eaff11639-RA,Egulf21938-RA,Eaff16264-RA,Egulf05014-RA,Eaff16598-RA,Egulf19416-RA,Egulf18545-RA,Eaff17411-RA,Eaff03120-RA,Egulf05924-RA,Egulf18406-RA,Eaffi21837-RA,Egulf04927-RA,Eaffi05864-RA,Eaffi05715-RA,Eaff19987-RA,Eaff09485-RA,Egulf07745-RA,Eaffi01264-RA,Eaff01141-RA,Eaffi07240-RA,Egulf09416-RA,Eaff03814-RA,Egulf18192-RA,Eg…
Cellular component	filtration diaphragm	GO:0036056	6	9.49256e-11	3.46155	25	34	2737	12885	Eaff12454-RA,Eaffi10737-RA,Eaff15109-RA,Egulf04368-RA,Egulf05757-RA,Eaffi22802-RA,Eaff04875-RA,Egulf17476-RA,Egulf11251-RA,Eaffi10694-RA,Eaffi05147-RA,Eaff19996-RA,Eaffi10325-RA,Eaff15471-RA,Eaffi22798-RA,Eaff15291-RA,Egulf15713-RA,Egulf15672-RA,Egulf17680-RA,Egulf17333-RA,Eaff15107-RA,Eaff18217-RA,Egulf17324-RA,Egulf15895-RA,Eaff11283-RA,
Cellular component	cell projection membrane	GO:0031253	5	9.49562e-11	1.62033	148	430	2737	12885	Eaff06489-RA,Eaff17478-RA,Egulf13360-RA,Egulf09425-RA,Eaffi18953-RA,Eaff09690-RA,Eaff16419-RA,Eaff11639-RA,Egulf07470-RA,Eaff13502-RA,Eaff16598-RA,Eaff16787-RA,Eaffi04076-RA,Eaffi16810-RA,Eaff02324-RA,Eaffi01410-RA,Eaffi19542-RA,Eaffi08671-RA,Eaffi13587-RA,Eaff01648-RA,Eaff14476-RA,Eaffi01328-RA,Egulf13623-RA,Eaffi03609-RA,Eaff13349-RA,Eaff15663-RA,Eaff13187-RA,Eaff07643-RA,Egulf05895-RA,Egulf143…
Cellular component	basolateral part of cell	GO:1990794	3	1.43413e-10	3.92309	20	24	2737	12885	Egulf21938-RA,Egulf18406-RA,Eaffi21837-RA,Eaffi05864-RA,Eaff19987-RA,Egulf07745-RA,Eaffi07240-RA,Eaffi18038-RA,Egulf18400-RA,Eaff09762-RA,Egulf04479-RA,Eaff12348-RA,Eaff05782-RA,Eaff01559-RA,Egulf09502-RA,Eaff09765-RA,Egulf18404-RA,Egulf19507-RA,Eaffi23876-RA,Eaffi01721-RA,
Cellular component	chromosomal region	GO:0098687	3	1.46778e-10	1.563	167	503	2737	12885	Egulf18131-RA,Egulf01364-RA,Eaff14062-RA,Egulf01655-RA,Eaffi19653-RA,Eaffi12832-RA,Eaff13293-RA,Eaff11676-RA,Egulf03251-RA,Egulf07727-RA,Eaffi12946-RA,Eaff19058-RA,Egulf20429-RA,Eaff02890-RA,Eaff12209-RA,Eaffi23121-RA,Eaffi14436-RA,Eaffi16011-RA,Egulf18605-RA,Egulf05279-RA,Eaffi11711-RA,Egulf04503-RA,Egulf02290-RA,Egulf00432-RA,Egulf02289-RA,Eaff16589-RA,Eaff13403-RA,Eaff06855-RA,Eaffi23010-RA,Ea…
Cellular component	obsolete cytoskeletal part	GO:0044430	0	1.54861e-10	1.29921	425	1540	2737	12885	Eaffi21345-RA,Egulf01045-RA,Eaff01580-RA,Egulf06159-RA,Egulf16993-RA,Egulf18131-RA,Eaff04284-RA,Eaffi18953-RA,Eaff19521-RA,Egulf01364-RA,Eaff14226-RA,Eaff14062-RA,Egulf01655-RA,Eaff17998-RA,Egulf14305-RA,Egulf15820-RA,Eaff00623-RA,Eaffi19653-RA,Eaffi12832-RA,Eaff13293-RA,Egulf03251-RA,Egulf21488-RA,Egulf07727-RA,Egulf14468-RA,Eaffi12946-RA,Eaffi11171-RA,Eaffi15418-RA,Eaff17680-RA,Eaffi23452-RA,Ea…
Cellular component	asymmetric synapse	GO:0032279	6	2.44108e-10	1.67653	125	351	2737	12885	Egulf21337-RA,Eaffi08922-RA,Egulf13360-RA,Egulf14305-RA,Eaff11639-RA,Egulf21938-RA,Egulf05014-RA,Eaff16598-RA,Egulf19416-RA,Eaff17411-RA,Eaff03120-RA,Egulf05924-RA,Egulf18406-RA,Eaffi21837-RA,Egulf04927-RA,Eaffi05864-RA,Eaffi05715-RA,Eaff19987-RA,Eaff09485-RA,Egulf07745-RA,Eaffi01264-RA,Eaff01141-RA,Eaffi07240-RA,Egulf09416-RA,Eaff03814-RA,Egulf18192-RA,Egulf22296-RA,Eaffi18038-RA,Egulf19242-RA,E…
Cellular component	perikaryon	GO:0043204	3	3.07004e-10	1.97938	74	176	2737	12885	Eaff00291-RA,Egulf09425-RA,Eaff11639-RA,Eaffi16011-RA,Eaffi16810-RA,Eaff02324-RA,Egulf19416-RA,Eaffi13587-RA,Eaff03120-RA,Egulf05924-RA,Eaff13349-RA,Eaffi05715-RA,Eaff09485-RA,Eaff18086-RA,Egulf09416-RA,Egulf18192-RA,Eaffi19879-RA,Eaffi18104-RA,Egulf19242-RA,Egulf14970-RA,Eaff10566-RA,Egulf04030-RA,Eaff17428-RA,Eaffi05184-RA,Egulf12171-RA,Egulf11522-RA,Egulf18239-RA,Eaffi18772-RA,Egulf08386-RA,Ea…
Cellular component	calcium channel complex	GO:0034704	7	3.44517e-10	2.67977	37	65	2737	12885	Eaffi06167-RA,Eaffi20233-RA,Eaff11087-RA,Egulf00537-RA,Eaff20005-RA,Eaff12671-RA,Egulf19094-RA,Eaff15766-RA,Egulf05093-RA,Eaffi18296-RA,Egulf14908-RA,Eaffi05023-RA,Eaff08233-RA,Eaffi03176-RA,Eaffi03328-RA,Eaff15736-RA,Egulf04216-RA,Eaff06204-RA,Eaff12561-RA,Egulf05959-RA,Egulf08312-RA,Eaffi08938-RA,Egulf18650-RA,Eaffi06698-RA,Eaff17885-RA,Egulf14505-RA,Eaff11833-RA,Eaff09988-RA,Eaffi04288-RA,Eaff…
Cellular component	spectrin-associated cytoskeleton	GO:0014731	7	3.70912e-10	4.70771	14	14	2737	12885	Egulf03616-RA,Egulf14236-RA,Egulf22296-RA,Eaffi24131-RA,Egulf00082-RA,Eaff13076-RA,Eaff15916-RA,Eaffi18458-RA,Egulf22300-RA,Eaff07830-RA,Egulf19704-RA,Egulf14360-RA,Eaff15713-RA,Eaffi18459-RA,
Cellular component	glycine-gated chloride channel complex	GO:0016935	7	3.70912e-10	4.70771	14	14	2737	12885	Eaff10158-RA,Egulf10934-RA,Eaff04968-RA,Egulf02145-RA,Egulf01899-RA,Eaffi13417-RA,Eaff04548-RA,Eaff14433-RA,Eaffi06391-RA,Eaff04595-RA,Egulf11354-RA,Egulf10869-RA,Egulf18832-RA,Egulf21404-RA,
Cellular component	glutamatergic synapse	GO:0098978	5	3.70912e-10	4.70771	14	14	2737	12885	Eaff10158-RA,Egulf10934-RA,Eaff04968-RA,Egulf02145-RA,Egulf01899-RA,Eaffi13417-RA,Eaff04548-RA,Eaff14433-RA,Eaffi06391-RA,Eaff04595-RA,Egulf11354-RA,Egulf10869-RA,Egulf18832-RA,Egulf21404-RA,
Cellular component	GABA-ergic synapse	GO:0098982	5	3.70912e-10	4.70771	14	14	2737	12885	Eaff10158-RA,Egulf10934-RA,Eaff04968-RA,Egulf02145-RA,Egulf01899-RA,Eaffi13417-RA,Eaff04548-RA,Eaff14433-RA,Eaffi06391-RA,Eaff04595-RA,Egulf11354-RA,Egulf10869-RA,Egulf18832-RA,Egulf21404-RA,
Cellular component	axolemma	GO:0030673	7	3.89154e-10	3.1777	27	40	2737	12885	Eaff06489-RA,Egulf13623-RA,Egulf18192-RA,Egulf22296-RA,Egulf19242-RA,Eaff10566-RA,Egulf18239-RA,Eaff09795-RA,Eaff09544-RA,Eaff10560-RA,Eaff09600-RA,Eaffi05420-RA,Eaffi18458-RA,Egulf22300-RA,Eaff12492-RA,Eaffi03418-RA,Eaff17938-RA,Egulf18432-RA,Eaffi19495-RA,Egulf19704-RA,Egulf04295-RA,Egulf14360-RA,Eaffi19331-RA,Eaff09545-RA,Egulf19250-RA,Eaff15713-RA,Eaffi18459-RA,
Cellular component	postsynaptic density	GO:0014069	5	4.03745e-10	1.68033	121	339	2737	12885	Egulf21337-RA,Eaffi08922-RA,Egulf13360-RA,Egulf14305-RA,Eaff11639-RA,Egulf21938-RA,Egulf05014-RA,Eaff16598-RA,Egulf19416-RA,Eaff17411-RA,Eaff03120-RA,Egulf05924-RA,Egulf18406-RA,Eaffi21837-RA,Egulf04927-RA,Eaffi05864-RA,Eaffi05715-RA,Eaff19987-RA,Eaff09485-RA,Egulf07745-RA,Eaffi01264-RA,Eaff01141-RA,Eaffi07240-RA,Egulf09416-RA,Eaff03814-RA,Egulf18192-RA,Egulf22296-RA,Eaffi18038-RA,Egulf19242-RA,E…
Cellular component	female germline ring canal	GO:0035324	5	4.04506e-10	3.49282	23	31	2737	12885	Eaffi23452-RA,Eaffi24020-RA,Egulf08813-RA,Egulf07430-RA,Eaff02608-RA,Eaffi02509-RA,Eaff10921-RA,Eaff13121-RA,Eaffi01408-RA,Egulf16936-RA,Egulf03574-RA,Egulf17423-RA,Eaff01253-RA,Eaff15962-RA,Egulf19517-RA,Eaff19456-RA,Eaff10923-RA,Eaff19796-RA,Eaffi07254-RA,Egulf19516-RA,Eaff10922-RA,Eaff15426-RA,Egulf19519-RA,
Cellular component	neuron to neuron synapse	GO:0098984	5	4.54696e-10	1.66233	125	354	2737	12885	Egulf21337-RA,Eaffi08922-RA,Egulf13360-RA,Egulf14305-RA,Eaff11639-RA,Egulf21938-RA,Egulf05014-RA,Eaff16598-RA,Egulf19416-RA,Eaff17411-RA,Eaff03120-RA,Egulf05924-RA,Egulf18406-RA,Eaffi21837-RA,Egulf04927-RA,Eaffi05864-RA,Eaffi05715-RA,Eaff19987-RA,Eaff09485-RA,Egulf07745-RA,Eaffi01264-RA,Eaff01141-RA,Eaffi07240-RA,Egulf09416-RA,Eaff03814-RA,Egulf18192-RA,Egulf22296-RA,Eaffi18038-RA,Egulf19242-RA,E…
Cellular component	plasma membrane raft	GO:0044853	6	5.235e-10	1.95071	75	181	2737	12885	Egulf20802-RA,Egulf21938-RA,Eaffi19542-RA,Egulf18406-RA,Eaffi21837-RA,Eaffi05864-RA,Eaff13187-RA,Eaff19987-RA,Egulf07745-RA,Eaffi07240-RA,Egulf18192-RA,Eaffi20926-RA,Eaffi18038-RA,Egulf19242-RA,Egulf18400-RA,Eaff10566-RA,Eaffi02589-RA,Eaff09762-RA,Egulf08691-RA,Egulf18239-RA,Eaff01192-RA,Egulf11950-RA,Eaff06642-RA,Egulf04479-RA,Eaff09487-RA,Eaff12348-RA,Eaff09795-RA,Egulf04548-RA,Eaff09544-RA,Eaf…
Cellular component	dendritic spine neck	GO:0044326	3	5.67028e-10	3.88898	19	23	2737	12885	Egulf21938-RA,Egulf18406-RA,Eaffi05864-RA,Eaff19987-RA,Egulf07745-RA,Eaffi07240-RA,Eaffi18038-RA,Egulf18400-RA,Eaff09762-RA,Egulf04479-RA,Eaff12348-RA,Eaff05782-RA,Eaff01559-RA,Egulf09502-RA,Eaff09765-RA,Egulf18404-RA,Egulf19507-RA,Eaffi23876-RA,Eaffi01721-RA,
Cellular component	membrane protein complex	GO:0098796	3	1.34922e-09	1.34083	317	1113	2737	12885	Eaff06489-RA,Egulf20802-RA,Eaffi04572-RA,Egulf13360-RA,Eaffi06167-RA,Eaff10158-RA,Egulf09425-RA,Egulf11154-RA,Eaffi00389-RA,Egulf02334-RA,Eaff03123-RA,Eaff16308-RA,Eaff11639-RA,Egulf21938-RA,Eaff04805-RA,Eaffi20233-RA,Eaff12097-RA,Eaff10212-RA,Egulf10934-RA,Eaff16598-RA,Eaffi16810-RA,Eaff02324-RA,Eaffi01410-RA,Eaff11087-RA,Egulf01012-RA,Eaff09599-RA,Egulf00537-RA,Egulf15931-RA,Eaff03120-RA,Eaffi0…
Cellular component	sperm fibrous sheath	GO:0035686	3	1.75271e-09	4.70771	13	13	2737	12885	Eaff11931-RA,Eaff19173-RA,Eaff17002-RA,Egulf13034-RA,Eaffi16611-RA,Egulf04992-RA,Egulf16551-RA,Eaffi16715-RA,Eaffi16653-RA,Eaff16785-RA,Eaff16919-RA,Egulf12754-RA,Egulf12847-RA,
Cellular component	actin filament	GO:0005884	7	1.97896e-09	2.13987	55	121	2737	12885	Eaffi21345-RA,Eaffi18953-RA,Eaff17998-RA,Egulf15820-RA,Egulf14468-RA,Eaff10212-RA,Eaff12603-RA,Eaffi08671-RA,Eaff04981-RA,Egulf00181-RA,Eaff15663-RA,Egulf05810-RA,Eaff04750-RA,Eaff11236-RA,Eaff18111-RA,Egulf14314-RA,Egulf16277-RA,Eaffi03711-RA,Eaff13253-RA,Egulf22158-RA,Eaffi08670-RA,Egulf11112-RA,Eaffi01177-RA,Eaff17432-RA,Egulf05016-RA,Egulf00184-RA,Eaffi24020-RA,Egulf01854-RA,Eaff19748-RA,Eaff…
Cellular component	basal part of cell	GO:0045178	3	2.3075e-09	1.53944	155	474	2737	12885	Egulf20802-RA,Eaff07460-RA,Eaffi06167-RA,Eaffi18953-RA,Eaff11639-RA,Egulf21938-RA,Eaffi20233-RA,Eaff11087-RA,Egulf18134-RA,Eaffi08671-RA,Eaffi13587-RA,Egulf03616-RA,Egulf18406-RA,Eaffi21837-RA,Eaff16655-RA,Eaff15663-RA,Egulf04927-RA,Eaffi05864-RA,Egulf14236-RA,Eaff19987-RA,Egulf14314-RA,Eaffi13559-RA,Eaff10167-RA,Egulf07745-RA,Eaff18086-RA,Eaffi07240-RA,Eaffi08670-RA,Egulf18190-RA,Eaffi21965-RA,E…
Cellular component	microvillus	GO:0005902	6	2.86558e-09	2.12233	55	122	2737	12885	Eaff06489-RA,Eaffi18953-RA,Eaff11639-RA,Eaffi19542-RA,Eaffi08671-RA,Eaffi13587-RA,Egulf13623-RA,Eaff15663-RA,Eaff13187-RA,Egulf14314-RA,Eaffi08670-RA,Eaffi01177-RA,Egulf04030-RA,Egulf11522-RA,Egulf17769-RA,Eaff10921-RA,Eaff08446-RA,Eaff06642-RA,Eaffi01858-RA,Eaff12985-RA,Eaff11771-RA,Egulf05346-RA,Eaffi03115-RA,Eaffi04579-RA,Eaff05116-RA,Eaff12492-RA,Egulf19517-RA,Eaffi14283-RA,Egulf03636-RA,Egul…
Cellular component	potassium channel complex	GO:0034705	7	3.03227e-09	2.38221	42	83	2737	12885	Eaff06489-RA,Egulf09425-RA,Eaff16308-RA,Eaff02324-RA,Eaff03120-RA,Egulf13623-RA,Eaff13349-RA,Egulf09416-RA,Eaff19403-RA,Egulf19307-RA,Eaffi18104-RA,Egulf14970-RA,Egulf13735-RA,Egulf08386-RA,Egulf04910-RA,Egulf19251-RA,Eaff03131-RA,Eaff08106-RA,Eaffi07003-RA,Eaff10609-RA,Egulf01294-RA,Egulf04523-RA,Egulf00400-RA,Egulf05129-RA,Eaffi04326-RA,Egulf01081-RA,Eaffi09942-RA,Eaff17938-RA,Eaff11818-RA,Egul…
Cellular component	dendritic spine head	GO:0044327	3	3.92609e-09	3.34095	22	31	2737	12885	Eaff00291-RA,Egulf21938-RA,Egulf18406-RA,Eaffi05864-RA,Eaff19987-RA,Egulf07745-RA,Eaffi07240-RA,Eaffi18038-RA,Egulf18400-RA,Eaff09762-RA,Egulf04479-RA,Eaff12348-RA,Eaff05782-RA,Eaff01559-RA,Eaffi00267-RA,Egulf09502-RA,Eaff09765-RA,Egulf18404-RA,Egulf19507-RA,Eaffi23876-RA,Egulf06305-RA,Eaffi01721-RA,
Cellular component	omega speckle	GO:0035062	5	8.18175e-09	3.68429	18	23	2737	12885	Eaffi14436-RA,Eaffi16011-RA,Eaff13403-RA,Egulf06558-RA,Eaffi00536-RA,Eaffi19879-RA,Eaff17428-RA,Egulf12171-RA,Eaffi02095-RA,Eaff19413-RA,Eaff00516-RA,Egulf16871-RA,Eaff06776-RA,Egulf03237-RA,Egulf21608-RA,Egulf20431-RA,Eaff02469-RA,Eaffi00699-RA,
Cellular component	female germline ring canal inner rim	GO:0035183	3	8.26977e-09	3.96439	16	19	2737	12885	Eaffi23452-RA,Eaffi24020-RA,Egulf08813-RA,Egulf07430-RA,Eaff02608-RA,Eaffi02509-RA,Eaff13121-RA,Eaffi01408-RA,Egulf16936-RA,Egulf03574-RA,Egulf17423-RA,Eaff01253-RA,Eaff15962-RA,Eaff19456-RA,Eaff19796-RA,Eaff15426-RA,
Cellular component	chloride channel complex	GO:0034707	6	8.62741e-09	3.811	17	21	2737	12885	Eaff10158-RA,Egulf10934-RA,Eaff04968-RA,Egulf02145-RA,Egulf01899-RA,Eaffi13417-RA,Eaff04548-RA,Eaff14433-RA,Eaffi06391-RA,Eaff04595-RA,Egulf11354-RA,Egulf10869-RA,Eaffi04280-RA,Egulf18832-RA,Eaff11839-RA,Egulf06902-RA,Egulf21404-RA,
Cellular component	somatodendritic compartment	GO:0036477	3	3.70765e-08	1.27328	370	1368	2737	12885	Eaffi21345-RA,Eaff06489-RA,Egulf21337-RA,Eaff01338-RA,Eaffi09126-RA,Egulf13360-RA,Eaff00291-RA,Eaff10158-RA,Egulf09425-RA,Eaffi18953-RA,Eaffi06041-RA,Eaff17998-RA,Eaff09690-RA,Eaff01084-RA,Eaff06515-RA,Eaff18129-RA,Egulf17362-RA,Eaff10384-RA,Eaff03916-RA,Eaff11639-RA,Egulf22131-RA,Egulf21938-RA,Egulf07470-RA,Eaff10212-RA,Eaff13502-RA,Eaffi16011-RA,Egulf10934-RA,Egulf05014-RA,Egulf07916-RA,Eaff165…
Cellular component	female germline ring canal outer rim	GO:0035182	3	3.9103e-08	4.70771	11	11	2737	12885	Eaffi24020-RA,Egulf08813-RA,Eaff02608-RA,Eaff10921-RA,Egulf19517-RA,Eaff10923-RA,Eaff19796-RA,Eaffi07254-RA,Egulf19516-RA,Eaff10922-RA,Egulf19519-RA,
Cellular component	U2AF complex	GO:0089701	4	3.9103e-08	4.70771	11	11	2737	12885	Egulf07306-RA,Eaff15146-RA,Eaffi01285-RA,Egulf13675-RA,Egulf04607-RA,Egulf17630-RA,Eaffi19110-RA,Eaffi03706-RA,Egulf20656-RA,Eaff01160-RA,Eaff16344-RA,
Cellular component	plasma membrane bounded cell projection	GO:0120025	4	5.33299e-08	1.19153	612	2418	2737	12885	Eaffi21345-RA,Eaff06489-RA,Egulf21337-RA,Eaff01338-RA,Eaff11931-RA,Eaff17478-RA,Eaffi09126-RA,Egulf13360-RA,Eaffi23551-RA,Eaff00291-RA,Eaff10158-RA,Egulf09425-RA,Eaff04284-RA,Eaffi18953-RA,Egulf01364-RA,Eaff10707-RA,Eaffi06041-RA,Eaff17998-RA,Eaff18894-RA,Eaff09690-RA,Egulf02334-RA,Eaff01084-RA,Eaff16419-RA,Eaff06515-RA,Egulf18372-RA,Eaffi21676-RA,Eaff18129-RA,Egulf17362-RA,Eaffi13736-RA,Eaffi124…
Cellular component	dendritic spine	GO:0043197	7	6.06715e-08	1.68001	91	255	2737	12885	Eaff01338-RA,Eaffi09126-RA,Egulf13360-RA,Eaff00291-RA,Eaff17998-RA,Eaff18129-RA,Eaff11639-RA,Egulf21938-RA,Eaff16598-RA,Eaffi04076-RA,Eaffi01840-RA,Eaff03120-RA,Eaff19053-RA,Egulf05924-RA,Egulf18406-RA,Eaffi05864-RA,Eaffi05715-RA,Egulf00940-RA,Eaff19987-RA,Eaff09485-RA,Egulf07745-RA,Eaff08079-RA,Eaffi07240-RA,Egulf09416-RA,Eaff03814-RA,Egulf18192-RA,Eaffi18038-RA,Egulf19242-RA,Eaffi01177-RA,Egulf…
Cellular component	neuron spine	GO:0044309	6	9.20398e-08	1.66693	91	257	2737	12885	Eaff01338-RA,Eaffi09126-RA,Egulf13360-RA,Eaff00291-RA,Eaff17998-RA,Eaff18129-RA,Eaff11639-RA,Egulf21938-RA,Eaff16598-RA,Eaffi04076-RA,Eaffi01840-RA,Eaff03120-RA,Eaff19053-RA,Egulf05924-RA,Egulf18406-RA,Eaffi05864-RA,Eaffi05715-RA,Egulf00940-RA,Eaff19987-RA,Eaff09485-RA,Egulf07745-RA,Eaff08079-RA,Eaffi07240-RA,Egulf09416-RA,Eaff03814-RA,Egulf18192-RA,Eaffi18038-RA,Egulf19242-RA,Eaffi01177-RA,Egulf…
Cellular component	apical plasma membrane	GO:0016324	5	1.00291e-07	1.47177	151	483	2737	12885	Egulf20802-RA,Eaffi04572-RA,Eaffi06167-RA,Eaff17998-RA,Eaff09690-RA,Eaffi14783-RA,Eaff16419-RA,Eaffi23452-RA,Egulf21938-RA,Eaffi20233-RA,Eaff12097-RA,Eaff11087-RA,Eaff09599-RA,Eaffi13587-RA,Egulf03616-RA,Eaffi03763-RA,Egulf18406-RA,Eaffi21837-RA,Eaff16655-RA,Eaff11643-RA,Eaffi05864-RA,Eaff19987-RA,Eaffi13559-RA,Eaff19963-RA,Egulf07745-RA,Eaffi07240-RA,Egulf18192-RA,Eaffi20926-RA,Egulf05340-RA,Eaf…
Cellular component	myosin VI complex	GO:0031476	5	1.25825e-07	3.71661	15	19	2737	12885	Eaffi18953-RA,Eaffi08671-RA,Eaff15663-RA,Egulf14314-RA,Eaffi08670-RA,Eaff10921-RA,Eaff08446-RA,Egulf19517-RA,Eaff10923-RA,Eaffi07254-RA,Egulf19516-RA,Eaff10922-RA,Egulf19519-RA,Eaffi18954-RA,Egulf00743-RA,
Cellular component	basal plasma membrane	GO:0009925	5	1.27082e-07	1.51824	129	400	2737	12885	Egulf20802-RA,Eaff07460-RA,Eaffi06167-RA,Eaff11639-RA,Egulf21938-RA,Eaffi20233-RA,Eaff11087-RA,Egulf18134-RA,Eaffi13587-RA,Egulf03616-RA,Egulf18406-RA,Eaffi21837-RA,Eaff16655-RA,Egulf04927-RA,Eaffi05864-RA,Egulf14236-RA,Eaff19987-RA,Eaffi13559-RA,Eaff10167-RA,Egulf07745-RA,Eaff18086-RA,Eaffi07240-RA,Egulf18190-RA,Eaffi20926-RA,Eaff15766-RA,Eaffi18038-RA,Egulf18400-RA,Eaffi18296-RA,Egulf04030-RA,E…
Cellular component	basolateral plasma membrane	GO:0016323	5	1.27082e-07	1.51824	129	400	2737	12885	Egulf20802-RA,Eaff07460-RA,Eaffi06167-RA,Eaff11639-RA,Egulf21938-RA,Eaffi20233-RA,Eaff11087-RA,Egulf18134-RA,Eaffi13587-RA,Egulf03616-RA,Egulf18406-RA,Eaffi21837-RA,Eaff16655-RA,Egulf04927-RA,Eaffi05864-RA,Egulf14236-RA,Eaff19987-RA,Eaffi13559-RA,Eaff10167-RA,Egulf07745-RA,Eaff18086-RA,Eaffi07240-RA,Egulf18190-RA,Eaffi20926-RA,Eaff15766-RA,Eaffi18038-RA,Egulf18400-RA,Eaffi18296-RA,Egulf04030-RA,E…
Cellular component	caveola	GO:0005901	7	1.38345e-07	1.88949	59	147	2737	12885	Egulf20802-RA,Egulf21938-RA,Eaffi19542-RA,Egulf18406-RA,Eaffi21837-RA,Eaffi05864-RA,Eaff13187-RA,Eaff19987-RA,Egulf07745-RA,Eaffi07240-RA,Eaffi20926-RA,Eaffi18038-RA,Egulf18400-RA,Eaffi02589-RA,Eaff09762-RA,Egulf08691-RA,Eaff01192-RA,Egulf11950-RA,Eaff06642-RA,Egulf04479-RA,Eaff09487-RA,Eaff12348-RA,Egulf04548-RA,Eaff12985-RA,Eaffi02733-RA,Eaffi03647-RA,Eaff05782-RA,Eaff02009-RA,Eaff12957-RA,Eaff…
Cellular component	obsolete membrane part	GO:0044425	0	1.57431e-07	1.13323	940	3905	2737	12885	Eaffi21906-RA,Eaff06489-RA,Egulf20802-RA,Eaff15515-RA,Eaff09079-RA,Eaff09080-RA,Egulf21337-RA,Eaffi04572-RA,Eaff07460-RA,Eaff01338-RA,Eaff11702-RA,Eaffi07939-RA,Egulf06159-RA,Eaffi16694-RA,Eaff17478-RA,Eaffi09126-RA,Eaffi08922-RA,Egulf13360-RA,Eaffi06167-RA,Eaff10158-RA,Egulf09425-RA,Eaffi15139-RA,Eaffi18953-RA,Eaff10707-RA,Eaff09398-RA,Eaff18346-RA,Eaff16534-RA,Egulf21133-RA,Eaff07128-RA,Egulf11…
Cellular component	presynaptic active zone	GO:0048786	3	1.67944e-07	1.90312	57	141	2737	12885	Eaff09079-RA,Eaff09080-RA,Egulf21337-RA,Eaffi07939-RA,Egulf18372-RA,Eaff19734-RA,Eaff11087-RA,Egulf00537-RA,Eaff03120-RA,Egulf01295-RA,Eaff09736-RA,Eaff01401-RA,Eaff12671-RA,Egulf09416-RA,Egulf15166-RA,Eaff15766-RA,Egulf04530-RA,Eaffi18296-RA,Egulf18370-RA,Egulf17008-RA,Eaffi05822-RA,Eaff18616-RA,Eaffi05023-RA,Eaff08233-RA,Eaffi03176-RA,Eaff15736-RA,Egulf10471-RA,Egulf01294-RA,Egulf05959-RA,Egulf…
Cellular component	neuron projection	GO:0043005	5	1.83281e-07	1.22032	464	1790	2737	12885	Eaffi21345-RA,Eaff06489-RA,Egulf21337-RA,Eaff01338-RA,Eaffi09126-RA,Egulf13360-RA,Eaffi23551-RA,Eaff00291-RA,Eaff10158-RA,Egulf09425-RA,Eaff04284-RA,Eaffi18953-RA,Egulf01364-RA,Eaffi06041-RA,Eaff17998-RA,Eaff18894-RA,Eaff09690-RA,Eaff01084-RA,Eaff06515-RA,Egulf18372-RA,Eaff18129-RA,Egulf17362-RA,Eaffi12423-RA,Eaff10384-RA,Eaff03916-RA,Eaff11639-RA,Egulf22131-RA,Egulf21938-RA,Egulf07470-RA,Eaff162…
Cellular component	PET complex	GO:1990923	3	1.84617e-07	4.70771	10	10	2737	12885	Eaff12209-RA,Egulf18605-RA,Egulf04503-RA,Eaff09789-RA,Eaff12096-RA,Egulf04469-RA,Eaff12062-RA,Eaffi05893-RA,Eaffi03598-RA,Eaffi03425-RA,
Cellular component	obsolete integral component of pigment granule membrane	GO:0090740	0	1.84617e-07	4.70771	10	10	2737	12885	Eaffi15139-RA,Eaff16832-RA,Egulf09059-RA,Eaff02834-RA,Eaff02837-RA,Eaff09004-RA,Egulf09064-RA,Egulf12940-RA,Egulf14331-RA,Eaff15683-RA,
Cellular component	cell projection	GO:0042995	3	1.96304e-07	1.18175	612	2438	2737	12885	Eaffi21345-RA,Eaff06489-RA,Egulf21337-RA,Eaff01338-RA,Eaff11931-RA,Eaff17478-RA,Eaffi09126-RA,Egulf13360-RA,Eaffi23551-RA,Eaff00291-RA,Eaff10158-RA,Egulf09425-RA,Eaff04284-RA,Eaffi18953-RA,Egulf01364-RA,Eaff10707-RA,Eaffi06041-RA,Eaff17998-RA,Eaff18894-RA,Eaff09690-RA,Egulf02334-RA,Eaff01084-RA,Eaff16419-RA,Eaff06515-RA,Egulf18372-RA,Eaffi21676-RA,Eaff18129-RA,Egulf17362-RA,Eaffi13736-RA,Eaffi124…
Cellular component	intercellular bridge	GO:0045171	3	2.70811e-07	1.99973	48	113	2737	12885	Egulf06159-RA,Eaffi18953-RA,Eaff19173-RA,Eaffi23452-RA,Eaffi08671-RA,Eaff15663-RA,Egulf14314-RA,Eaff00148-RA,Eaffi08670-RA,Eaffi16611-RA,Eaff16081-RA,Eaffi24020-RA,Egulf08813-RA,Egulf07430-RA,Eaff02608-RA,Egulf16551-RA,Eaff20185-RA,Eaffi02509-RA,Eaff10921-RA,Eaff08446-RA,Eaff13121-RA,Egulf03183-RA,Egulf14044-RA,Eaffi01408-RA,Egulf16936-RA,Egulf03574-RA,Egulf17423-RA,Eaff01253-RA,Eaffi00120-RA,Eaf…
Cellular component	T-tubule	GO:0030315	3	3.18773e-07	2.16001	39	85	2737	12885	Egulf21938-RA,Egulf00537-RA,Egulf18406-RA,Eaff20005-RA,Eaffi21837-RA,Eaff16655-RA,Eaffi05864-RA,Eaff19987-RA,Eaffi13559-RA,Egulf07745-RA,Eaff12671-RA,Eaffi07240-RA,Eaffi18038-RA,Egulf18400-RA,Egulf05093-RA,Eaff09762-RA,Egulf04479-RA,Eaff12348-RA,Eaff05782-RA,Eaff08233-RA,Eaffi03176-RA,Eaff15736-RA,Eaff05094-RA,Eaffi08938-RA,Eaff01559-RA,Egulf13256-RA,Egulf09502-RA,Eaff11833-RA,Eaffi04288-RA,Eaff0…
Cellular component	polytene chromosome	GO:0005700	7	4.72854e-07	1.49413	126	397	2737	12885	Egulf18131-RA,Eaff14062-RA,Eaffi19653-RA,Eaff08622-RA,Eaffi12832-RA,Eaff13293-RA,Eaff11676-RA,Egulf07727-RA,Eaffi12946-RA,Egulf15807-RA,Eaff19058-RA,Eaff02890-RA,Eaff12209-RA,Eaffi23121-RA,Eaffi14436-RA,Eaffi16011-RA,Egulf05279-RA,Egulf04503-RA,Egulf02290-RA,Egulf00432-RA,Egulf02289-RA,Eaff13403-RA,Eaffi12190-RA,Eaffi21583-RA,Eaffi15214-RA,Eaffi02248-RA,Eaffi04491-RA,Eaffi13385-RA,Egulf16403-RA,E…
Cellular component	apical part of cell	GO:0045177	3	4.73766e-07	1.35624	208	722	2737	12885	Egulf20802-RA,Eaffi04572-RA,Eaffi06167-RA,Eaffi18953-RA,Eaffi09470-RA,Eaff17998-RA,Eaff09690-RA,Egulf01414-RA,Eaffi14783-RA,Eaff16419-RA,Eaff06515-RA,Eaffi11171-RA,Eaffi23452-RA,Eaff11639-RA,Egulf21938-RA,Eaffi20233-RA,Eaff12097-RA,Eaff09039-RA,Eaff11087-RA,Eaff09599-RA,Egulf21098-RA,Eaffi08671-RA,Eaffi13587-RA,Egulf03616-RA,Eaffi03763-RA,Egulf18406-RA,Eaffi21837-RA,Eaff16655-RA,Eaff11643-RA,Eaff…
Cellular component	nuclear microtubule	GO:0005880	8	8.71382e-07	4.70771	9	9	2737	12885	Egulf20135-RA,Eaffi15323-RA,Eaff07155-RA,Eaff07908-RA,Egulf15904-RA,Egulf20871-RA,Eaff18654-RA,Eaffi14933-RA,Eaffi20533-RA,
Cellular component	voltage-gated potassium channel complex	GO:0008076	8	1.13921e-06	2.16802	35	76	2737	12885	Eaff06489-RA,Egulf09425-RA,Eaff16308-RA,Eaff02324-RA,Egulf13623-RA,Eaff13349-RA,Eaff19403-RA,Egulf19307-RA,Eaffi18104-RA,Egulf14970-RA,Egulf13735-RA,Egulf08386-RA,Egulf04910-RA,Egulf19251-RA,Eaff03131-RA,Eaff08106-RA,Eaffi07003-RA,Eaff10609-RA,Egulf04523-RA,Egulf00400-RA,Egulf05129-RA,Eaffi04326-RA,Eaffi09942-RA,Eaff17938-RA,Eaff11818-RA,Egulf16856-RA,Eaff12309-RA,Egulf04911-RA,Eaffi24088-RA,Eaff…
Cellular component	polymeric cytoskeletal fiber	GO:0099513	6	1.62541e-06	1.45369	130	421	2737	12885	Eaffi21345-RA,Egulf16993-RA,Eaffi18953-RA,Eaff19521-RA,Egulf01364-RA,Eaff17998-RA,Egulf15820-RA,Egulf14468-RA,Eaffi11171-RA,Eaff10212-RA,Eaff05180-RA,Eaff11035-RA,Egulf13954-RA,Eaffi11711-RA,Egulf20135-RA,Egulf19416-RA,Eaff12603-RA,Eaffi15323-RA,Eaffi08671-RA,Eaff04981-RA,Egulf00181-RA,Eaff15663-RA,Eaff14106-RA,Egulf05810-RA,Eaff04750-RA,Eaff11236-RA,Eaff18111-RA,Egulf02238-RA,Egulf14314-RA,Egulf…
Cellular component	apicolateral plasma membrane	GO:0016327	5	1.66497e-06	2.13987	35	77	2737	12885	Egulf18134-RA,Eaff09599-RA,Egulf22296-RA,Eaffi18325-RA,Egulf05945-RA,Egulf11353-RA,Eaffi05196-RA,Egulf17769-RA,Eaffi03193-RA,Eaff09493-RA,Eaff11771-RA,Eaffi18458-RA,Egulf22300-RA,Egulf18132-RA,Eaffi22699-RA,Eaffi13415-RA,Egulf19704-RA,Egulf14360-RA,Eaff12657-RA,Eaffi03012-RA,Eaff15087-RA,Eaffi05782-RA,Eaff15790-RA,Egulf21680-RA,Egulf04103-RA,Eaff11110-RA,Egulf14477-RA,Eaff15713-RA,Eaff04966-RA,Eg…
Cellular component	obsolete cell cortex part	GO:0044448	0	1.8103e-06	1.51269	107	333	2737	12885	Eaffi21345-RA,Egulf06159-RA,Eaff14226-RA,Eaff17998-RA,Egulf14305-RA,Egulf01414-RA,Egulf18372-RA,Eaffi13736-RA,Eaffi11171-RA,Eaffi23452-RA,Eaff09039-RA,Eaff09599-RA,Eaff09736-RA,Egulf12386-RA,Eaffi08714-RA,Eaff01401-RA,Eaff10167-RA,Egulf08360-RA,Eaff12184-RA,Eaff00148-RA,Eaffi03711-RA,Egulf03789-RA,Egulf22296-RA,Egulf22158-RA,Eaff13671-RA,Eaff07615-RA,Egulf18190-RA,Egulf15166-RA,Egulf05016-RA,Eaff…
Cellular component	obsolete chromosomal part	GO:0044427	0	3.67109e-06	1.24639	314	1186	2737	12885	Eaffi21345-RA,Eaff01580-RA,Egulf16993-RA,Egulf18131-RA,Eaff19521-RA,Egulf01364-RA,Eaff18703-RA,Eaff14062-RA,Egulf01655-RA,Egulf15820-RA,Eaffi19653-RA,Eaff08622-RA,Eaffi12832-RA,Eaff13293-RA,Eaff11676-RA,Egulf03251-RA,Egulf07727-RA,Eaff12655-RA,Egulf14468-RA,Eaffi12946-RA,Eaff11688-RA,Eaff19058-RA,Egulf22131-RA,Egulf05137-RA,Egulf20429-RA,Eaff02890-RA,Eaff12209-RA,Eaffi17667-RA,Eaff02589-RA,Eaffi2…
Cellular component	intracellular cyclic nucleotide activated cation channel complex	GO:0017071	7	4.11169e-06	4.70771	8	8	2737	12885	Eaffi16810-RA,Egulf18099-RA,Eaff18470-RA,Egulf19665-RA,Eaffi05670-RA,Eaffi03605-RA,Egulf14548-RA,Egulf18100-RA,
Cellular component	L-type voltage-gated calcium channel complex	GO:1990454	9	4.11169e-06	4.70771	8	8	2737	12885	Egulf00537-RA,Eaff12671-RA,Eaff08233-RA,Eaffi03176-RA,Eaff15736-RA,Eaffi08938-RA,Eaffi18487-RA,Egulf04090-RA,
Cellular component	inhibitory synapse	GO:0060077	5	1.3044e-05	2.47155	21	40	2737	12885	Eaff10158-RA,Egulf07470-RA,Egulf10934-RA,Eaff01648-RA,Eaffi01328-RA,Eaff04968-RA,Egulf02145-RA,Egulf01899-RA,Eaffi13417-RA,Eaff04548-RA,Eaff14433-RA,Eaffi06391-RA,Eaff01292-RA,Eaff04595-RA,Egulf20678-RA,Egulf11354-RA,Egulf10869-RA,Eaff07012-RA,Egulf07844-RA,Egulf18832-RA,Egulf21404-RA,
Cellular component	membrane raft	GO:0045121	5	1.4418e-05	1.41463	122	406	2737	12885	Egulf20802-RA,Egulf21938-RA,Eaffi19542-RA,Eaffi13587-RA,Egulf18406-RA,Eaffi21837-RA,Egulf17829-RA,Eaff17002-RA,Eaffi05864-RA,Eaff13187-RA,Egulf06144-RA,Eaff14897-RA,Eaff19987-RA,Egulf07745-RA,Eaff06883-RA,Eaff05741-RA,Eaff07846-RA,Eaffi01325-RA,Eaffi07240-RA,Eaff03814-RA,Egulf18192-RA,Eaffi14602-RA,Eaffi20926-RA,Eaffi18038-RA,Egulf19242-RA,Egulf18400-RA,Egulf18979-RA,Eaff10566-RA,Eaffi02589-RA,Ea…
Cellular component	membrane microdomain	GO:0098857	4	1.4418e-05	1.41463	122	406	2737	12885	Egulf20802-RA,Egulf21938-RA,Eaffi19542-RA,Eaffi13587-RA,Egulf18406-RA,Eaffi21837-RA,Egulf17829-RA,Eaff17002-RA,Eaffi05864-RA,Eaff13187-RA,Egulf06144-RA,Eaff14897-RA,Eaff19987-RA,Egulf07745-RA,Eaff06883-RA,Eaff05741-RA,Eaff07846-RA,Eaffi01325-RA,Eaffi07240-RA,Eaff03814-RA,Egulf18192-RA,Eaffi14602-RA,Eaffi20926-RA,Eaffi18038-RA,Egulf19242-RA,Egulf18400-RA,Egulf18979-RA,Eaff10566-RA,Eaffi02589-RA,Ea…
Cellular component	commitment complex	GO:0000243	6	1.73368e-05	3.32309	12	17	2737	12885	Egulf07306-RA,Eaffi01285-RA,Egulf04607-RA,Eaff05248-RA,Egulf21007-RA,Eaff08775-RA,Eaffi03706-RA,Egulf04280-RA,Eaff01160-RA,Eaff12509-RA,Egulf01126-RA,Egulf11677-RA,
Cellular component	stereocilia coupling link	GO:0002139	3	1.93957e-05	4.70771	7	7	2737	12885	Eaff10921-RA,Egulf19517-RA,Eaff10923-RA,Eaffi07254-RA,Egulf19516-RA,Eaff10922-RA,Egulf19519-RA,
Cellular component	stereocilia tip link	GO:0002140	4	1.93957e-05	4.70771	7	7	2737	12885	Eaff10921-RA,Egulf19517-RA,Eaff10923-RA,Eaffi07254-RA,Egulf19516-RA,Eaff10922-RA,Egulf19519-RA,
Cellular component	kainate selective glutamate receptor complex	GO:0032983	8	1.93957e-05	4.70771	7	7	2737	12885	Eaff03120-RA,Egulf09416-RA,Egulf01294-RA,Egulf01081-RA,Eaffi03621-RA,Egulf08016-RA,Eaff08743-RA,
Cellular component	equatorial microtubule organizing center	GO:0000923	4	1.93957e-05	4.70771	7	7	2737	12885	Eaff05180-RA,Eaffi07840-RA,Egulf11600-RA,Eaffi13658-RA,Eaff05181-RA,Eaffi13659-RA,Eaff05182-RA,
Cellular component	chrorion micropyle	GO:0070825	3	1.93957e-05	4.70771	7	7	2737	12885	Eaff10921-RA,Egulf19517-RA,Eaff10923-RA,Eaffi07254-RA,Egulf19516-RA,Eaff10922-RA,Egulf19519-RA,
Cellular component	obsolete external encapsulating structure part	GO:0044462	0	1.93957e-05	4.70771	7	7	2737	12885	Eaff10921-RA,Egulf19517-RA,Eaff10923-RA,Eaffi07254-RA,Egulf19516-RA,Eaff10922-RA,Egulf19519-RA,
Cellular component	stereocilia tip-link density	GO:1990427	3	1.93957e-05	4.70771	7	7	2737	12885	Eaff10921-RA,Egulf19517-RA,Eaff10923-RA,Eaffi07254-RA,Egulf19516-RA,Eaff10922-RA,Egulf19519-RA,
Cellular component	upper tip-link density	GO:1990435	4	1.93957e-05	4.70771	7	7	2737	12885	Eaff10921-RA,Egulf19517-RA,Eaff10923-RA,Eaffi07254-RA,Egulf19516-RA,Eaff10922-RA,Egulf19519-RA,
Cellular component	sodium channel complex	GO:0034706	7	1.93957e-05	4.70771	7	7	2737	12885	Eaff03120-RA,Egulf09416-RA,Egulf01294-RA,Egulf01081-RA,Eaffi03621-RA,Egulf08016-RA,Eaff08743-RA,
Cellular component	plasma membrane signaling receptor complex	GO:0098802	5	2.50686e-05	1.73442	49	133	2737	12885	Egulf20802-RA,Egulf13360-RA,Eaff11639-RA,Eaff16598-RA,Eaff03120-RA,Eaff06883-RA,Egulf09416-RA,Egulf18192-RA,Eaffi14602-RA,Eaffi20926-RA,Egulf19242-RA,Egulf18979-RA,Eaff10566-RA,Egulf04030-RA,Egulf08691-RA,Eaffi15959-RA,Eaff06884-RA,Egulf18239-RA,Egulf05049-RA,Eaff08114-RA,Egulf20546-RA,Eaff09795-RA,Eaff09544-RA,Eaff02009-RA,Eaff10560-RA,Egulf00403-RA,Egulf01294-RA,Eaff09600-RA,Eaff08115-RA,Eaffi0…
Cellular component	pigment granule membrane	GO:0090741	7	2.78347e-05	3.62131	10	13	2737	12885	Eaffi15139-RA,Eaff16832-RA,Egulf09059-RA,Eaff02834-RA,Eaff02837-RA,Eaff09004-RA,Egulf09064-RA,Egulf12940-RA,Egulf14331-RA,Eaff15683-RA,
Cellular component	sarcolemma	GO:0042383	5	3.11285e-05	1.65806	56	159	2737	12885	Eaff11639-RA,Egulf21938-RA,Egulf00537-RA,Egulf18406-RA,Eaff20005-RA,Eaffi21837-RA,Eaff16655-RA,Eaffi05864-RA,Eaff19987-RA,Eaffi13559-RA,Egulf07745-RA,Eaff12671-RA,Eaffi07240-RA,Eaffi18038-RA,Egulf18400-RA,Egulf05093-RA,Egulf04030-RA,Eaff09762-RA,Eaff01192-RA,Egulf11950-RA,Egulf04479-RA,Eaff09487-RA,Eaff12348-RA,Eaff05782-RA,Eaff08233-RA,Eaffi03176-RA,Eaff15736-RA,Eaff18149-RA,Eaff05094-RA,Eaff160…
Cellular component	cell cortex region	GO:0099738	5	3.15602e-05	1.59376	65	192	2737	12885	Eaff17998-RA,Egulf01414-RA,Egulf18372-RA,Eaffi13736-RA,Eaffi11171-RA,Eaffi23452-RA,Eaff09039-RA,Eaff09599-RA,Eaff09736-RA,Eaffi08714-RA,Eaff01401-RA,Eaff10167-RA,Egulf08360-RA,Eaffi03711-RA,Eaff13671-RA,Eaff07615-RA,Egulf18190-RA,Egulf15166-RA,Eaff17325-RA,Egulf02687-RA,Egulf18370-RA,Eaff19748-RA,Eaff09541-RA,Eaffi05417-RA,Egulf07430-RA,Eaffi05196-RA,Egulf18840-RA,Eaffi05822-RA,Eaff13673-RA,Eaff1…
Cellular component	cytoplasmic microtubule	GO:0005881	8	3.28409e-05	1.91593	35	86	2737	12885	Eaff11035-RA,Egulf13954-RA,Eaff14106-RA,Egulf02238-RA,Eaff08392-RA,Egulf03789-RA,Eaff16556-RA,Eaffi07840-RA,Eaffi11705-RA,Eaff16438-RA,Egulf03628-RA,Eaff16146-RA,Egulf01435-RA,Eaff12924-RA,Egulf08232-RA,Eaffi08745-RA,Egulf00678-RA,Eaffi05303-RA,Eaff13059-RA,Eaff13096-RA,Eaff09059-RA,Eaff18375-RA,Eaff14104-RA,Egulf13395-RA,Egulf08234-RA,Eaffi02532-RA,Egulf02242-RA,Eaffi11709-RA,Egulf13554-RA,Egulf…
Cellular component	focal adhesion	GO:0005925	6	3.35936e-05	1.64625	57	163	2737	12885	Egulf15541-RA,Eaffi06041-RA,Egulf15820-RA,Eaff11447-RA,Eaff16419-RA,Egulf14468-RA,Eaff04817-RA,Eaff11639-RA,Egulf07916-RA,Eaff12603-RA,Egulf18545-RA,Eaff04981-RA,Egulf00181-RA,Egulf04927-RA,Eaff18111-RA,Egulf22158-RA,Egulf05581-RA,Eaff00927-RA,Eaff17432-RA,Egulf05016-RA,Egulf00184-RA,Egulf04030-RA,Egulf11185-RA,Eaff15799-RA,Eaff11986-RA,Egulf12162-RA,Eaffi04079-RA,Egulf07041-RA,Eaffi11935-RA,Eaff…
Cellular component	external side of plasma membrane	GO:0009897	4	3.55386e-05	1.72496	48	131	2737	12885	Eaff10158-RA,Eaff11639-RA,Egulf10934-RA,Egulf16380-RA,Eaff04968-RA,Egulf02145-RA,Egulf01899-RA,Eaffi13417-RA,Eaff03814-RA,Egulf18192-RA,Egulf19242-RA,Eaff04548-RA,Eaff14433-RA,Eaff10566-RA,Egulf04030-RA,Eaffi06391-RA,Egulf18239-RA,Eaff08256-RA,Eaff01192-RA,Egulf11950-RA,Egulf12491-RA,Eaff09795-RA,Eaff09544-RA,Eaff04595-RA,Eaff10560-RA,Eaff09600-RA,Eaffi05420-RA,Egulf05346-RA,Eaffi03115-RA,Egulf14…
Cellular component	presynaptic active zone cytoplasmic component	GO:0098831	6	4.19218e-05	3.13847	12	18	2737	12885	Egulf18372-RA,Eaff09736-RA,Eaff01401-RA,Egulf15166-RA,Egulf18370-RA,Eaffi05822-RA,Eaff18616-RA,Egulf18371-RA,Eaff01656-RA,Eaffi20262-RA,Eaffi22522-RA,Egulf07576-RA,
Cellular component	myelin sheath	GO:0043209	3	4.87321e-05	1.4439	96	313	2737	12885	Eaff11931-RA,Eaff19173-RA,Egulf21938-RA,Eaffi01410-RA,Egulf18406-RA,Eaffi21837-RA,Egulf17829-RA,Eaffi05864-RA,Egulf05810-RA,Egulf12386-RA,Eaff14897-RA,Eaff11236-RA,Eaff19987-RA,Egulf13034-RA,Egulf07745-RA,Eaff05741-RA,Egulf16277-RA,Eaff00148-RA,Eaffi07240-RA,Eaffi03711-RA,Eaffi18038-RA,Eaffi16611-RA,Egulf04992-RA,Egulf18400-RA,Eaff09762-RA,Eaff19748-RA,Eaff15959-RA,Eaffi18659-RA,Egulf05056-RA,Egu…
Cellular component	interchromatin granule	GO:0035061	4	5.82966e-05	3.23655	11	16	2737	12885	Eaff18703-RA,Egulf21377-RA,Eaff12808-RA,Eaffi20077-RA,Eaff16485-RA,Egulf13489-RA,Eaff06232-RA,Egulf21379-RA,Egulf13488-RA,Egulf16031-RA,Eaff18705-RA,
Cellular component	transcription regulator complex	GO:0005667	3	6.00319e-05	1.32087	156	556	2737	12885	Egulf01045-RA,Eaff01580-RA,Egulf16993-RA,Eaff00291-RA,Eaff19521-RA,Eaff14062-RA,Egulf13179-RA,Eaff08622-RA,Egulf09781-RA,Egulf15807-RA,Egulf02290-RA,Eaff10964-RA,Eaffi17950-RA,Egulf02289-RA,Egulf02554-RA,Eaffi21782-RA,Egulf05615-RA,Eaff08717-RA,Egulf03182-RA,Eaff02518-RA,Eaffi12190-RA,Egulf12268-RA,Eaff09632-RA,Eaffi16267-RA,Eaff16196-RA,Egulf01052-RA,Eaff01612-RA,Egulf16403-RA,Egulf22016-RA,Eaff…
Cellular component	postsynaptic density membrane	GO:0098839	7	6.24951e-05	2.9143	13	21	2737	12885	Egulf13360-RA,Eaff16598-RA,Egulf04927-RA,Eaffi15959-RA,Eaff11986-RA,Eaffi04079-RA,Egulf04928-RA,Eaff11984-RA,Egulf01081-RA,Eaff16597-RA,Eaffi15958-RA,Eaff08743-RA,Eaff11985-RA,
Cellular component	postsynaptic specialization membrane	GO:0099634	6	6.24951e-05	2.9143	13	21	2737	12885	Egulf13360-RA,Eaff16598-RA,Egulf04927-RA,Eaffi15959-RA,Eaff11986-RA,Eaffi04079-RA,Egulf04928-RA,Eaff11984-RA,Egulf01081-RA,Eaff16597-RA,Eaffi15958-RA,Eaff08743-RA,Eaff11985-RA,
Cellular component	lamellipodium membrane	GO:0031258	6	7.87744e-05	3.36265	10	14	2737	12885	Eaff11639-RA,Egulf04030-RA,Egulf05346-RA,Eaffi03115-RA,Eaffi04579-RA,Eaff18793-RA,Egulf16112-RA,Eaffi20353-RA,Eaff12726-RA,Egulf11336-RA,
Cellular component	MLL3/4 complex	GO:0044666	7	8.16247e-05	2.74616	14	24	2737	12885	Eaff11676-RA,Egulf15807-RA,Egulf05279-RA,Egulf01469-RA,Egulf01470-RA,Eaffi04491-RA,Eaff09093-RA,Eaffi07912-RA,Eaffi00359-RA,Eaffi04490-RA,Eaffi10856-RA,Egulf05278-RA,Eaff18124-RA,Eaff11677-RA,
Cellular component	cytoplasmic region	GO:0099568	4	8.64705e-05	1.26319	205	764	2737	12885	Eaffi21345-RA,Egulf06159-RA,Eaffi18953-RA,Eaff14226-RA,Eaffi06041-RA,Eaff17998-RA,Egulf14305-RA,Egulf01414-RA,Eaff06515-RA,Egulf18372-RA,Eaff11203-RA,Eaffi13736-RA,Eaffi11171-RA,Eaffi23452-RA,Eaff09039-RA,Eaffi16011-RA,Egulf05014-RA,Eaff09599-RA,Egulf21098-RA,Eaffi08671-RA,Egulf18545-RA,Eaff13289-RA,Egulf22044-RA,Eaff03120-RA,Eaff05681-RA,Eaff20005-RA,Eaff15663-RA,Eaff09736-RA,Egulf12386-RA,Eaffi…
Cellular component	multivesicular body, internal vesicle	GO:0097487	8	9.14674e-05	4.70771	6	6	2737	12885	Eaff06642-RA,Eaffi14283-RA,Egulf20978-RA,Eaff06644-RA,Eaff06643-RA,Egulf02013-RA,
Cellular component	interleukin-5 receptor complex	GO:0005895	6	9.14674e-05	4.70771	6	6	2737	12885	Eaff06883-RA,Eaffi14602-RA,Egulf18979-RA,Eaff06884-RA,Egulf20546-RA,Eaff10291-RA,
Cellular component	integrin alphav-beta5 complex	GO:0034684	7	9.14674e-05	4.70771	6	6	2737	12885	Eaff11639-RA,Egulf04030-RA,Egulf05346-RA,Eaffi03115-RA,Eaffi04579-RA,Eaff12726-RA,
Cellular component	integrin alphav-beta6 complex	GO:0034685	7	9.14674e-05	4.70771	6	6	2737	12885	Eaff11639-RA,Egulf04030-RA,Egulf05346-RA,Eaffi03115-RA,Eaffi04579-RA,Eaff12726-RA,
Cellular component	integrin alphav-beta8 complex	GO:0034686	7	9.14674e-05	4.70771	6	6	2737	12885	Eaff11639-RA,Egulf04030-RA,Egulf05346-RA,Eaffi03115-RA,Eaffi04579-RA,Eaff12726-RA,
Cellular component	gut granule	GO:0044840	8	9.17519e-05	2.97329	12	19	2737	12885	Eaffi00389-RA,Eaff16419-RA,Eaffi19291-RA,Eaffi19287-RA,Eaffi18218-RA,Eaff00400-RA,Egulf09324-RA,Egulf21992-RA,Eaff03044-RA,Eaff05733-RA,Egulf13577-RA,Eaff18076-RA,
Cellular component	gut granule membrane	GO:0044841	7	9.17519e-05	2.97329	12	19	2737	12885	Eaffi00389-RA,Eaff16419-RA,Eaffi19291-RA,Eaffi19287-RA,Eaffi18218-RA,Eaff00400-RA,Egulf09324-RA,Egulf21992-RA,Eaff03044-RA,Eaff05733-RA,Egulf13577-RA,Eaff18076-RA,
Cellular component	cardiac myofibril	GO:0097512	8	0.000101791	3.53078	9	12	2737	12885	Eaff17998-RA,Eaff17680-RA,Eaff16646-RA,Egulf13362-RA,Eaffi09979-RA,Eaffi15872-RA,Eaffi10227-RA,Egulf13280-RA,Egulf15056-RA,
Cellular component	heterochromatin	GO:0000792	4	0.000118889	1.66363	47	133	2737	12885	Egulf01655-RA,Eaff12655-RA,Eaff12209-RA,Eaffi16011-RA,Egulf04503-RA,Egulf04205-RA,Egulf06392-RA,Egulf04883-RA,Eaffi19879-RA,Eaff09269-RA,Eaff17428-RA,Egulf12171-RA,Eaff08341-RA,Eaff16174-RA,Eaff19413-RA,Eaff12096-RA,Egulf04469-RA,Eaff12016-RA,Egulf05542-RA,Egulf01905-RA,Egulf13913-RA,Eaff12576-RA,Egulf16871-RA,Eaffi04825-RA,Eaff02984-RA,Eaff00367-RA,Egulf14479-RA,Egulf00635-RA,Eaffi04050-RA,Eaffi…
Cellular component	dendritic spine membrane	GO:0032591	7	0.000121962	3.76617	8	10	2737	12885	Eaff11639-RA,Egulf04030-RA,Egulf05346-RA,Eaffi03115-RA,Egulf01081-RA,Eaffi04579-RA,Eaff12726-RA,Eaff08743-RA,
Cellular component	brush border	GO:0005903	4	0.000122727	1.48352	75	238	2737	12885	Eaffi21345-RA,Eaff17478-RA,Eaffi18953-RA,Eaff17998-RA,Eaff09690-RA,Eaff16419-RA,Egulf21488-RA,Egulf11514-RA,Eaffi19542-RA,Eaffi08671-RA,Eaffi13587-RA,Eaff15663-RA,Eaff13187-RA,Egulf05895-RA,Egulf14314-RA,Eaff18086-RA,Eaffi01325-RA,Egulf21483-RA,Egulf22158-RA,Eaffi14741-RA,Eaffi08670-RA,Eaff00927-RA,Eaffi01177-RA,Egulf05016-RA,Egulf11522-RA,Eaffi18772-RA,Eaff01192-RA,Egulf11950-RA,Egulf07041-RA,Ea…
Cellular component	Yb body	GO:0070725	4	0.000126384	4.11925	7	8	2737	12885	Eaff12209-RA,Egulf04503-RA,Eaff12096-RA,Egulf04469-RA,Eaff12062-RA,Eaffi03598-RA,Eaffi03425-RA,
Cellular component	I band	GO:0031674	3	0.000134938	1.51643	67	208	2737	12885	Eaffi21345-RA,Eaff11931-RA,Eaff17998-RA,Eaffi15418-RA,Eaffi23452-RA,Eaff19058-RA,Eaffi05569-RA,Eaff09656-RA,Eaffi14578-RA,Eaffi02849-RA,Eaff20005-RA,Egulf07071-RA,Egulf07505-RA,Eaff17002-RA,Eaffi12714-RA,Egulf16403-RA,Egulf13034-RA,Egulf22296-RA,Egulf20214-RA,Egulf04992-RA,Eaff06505-RA,Eaffi04095-RA,Egulf05093-RA,Egulf18288-RA,Egulf16402-RA,Eaffi24020-RA,Eaffi01137-RA,Egulf08813-RA,Egulf07430-RA,…
Cellular component	centriole	GO:0005814	6	0.000144747	1.81889	34	88	2737	12885	Egulf22131-RA,Eaff05180-RA,Eaffi11711-RA,Eaff13318-RA,Egulf06144-RA,Eaffi22055-RA,Eaff07846-RA,Egulf04360-RA,Eaffi03711-RA,Egulf03789-RA,Eaff14098-RA,Egulf19217-RA,Eaff13319-RA,Eaff19748-RA,Eaff05610-RA,Eaff12924-RA,Egulf11600-RA,Eaffi13658-RA,Egulf04609-RA,Eaffi09489-RA,Egulf11576-RA,Egulf02245-RA,Eaff05153-RA,Eaff05181-RA,Egulf12967-RA,Eaff12439-RA,Egulf03315-RA,Eaffi16769-RA,Eaffi13659-RA,Eaff…
Cellular component	chromosome, telomeric region	GO:0000781	4	0.000164117	1.70811	41	113	2737	12885	Eaff12209-RA,Eaffi16011-RA,Egulf04503-RA,Eaff06855-RA,Eaffi14560-RA,Eaff09632-RA,Eaffi14559-RA,Eaff04750-RA,Eaff13253-RA,Eaffi19879-RA,Egulf11112-RA,Eaff13393-RA,Eaff06856-RA,Egulf18267-RA,Eaffi14561-RA,Eaffi05547-RA,Eaff17428-RA,Egulf01854-RA,Eaff09634-RA,Egulf12171-RA,Egulf03414-RA,Eaff19413-RA,Eaff12096-RA,Eaffi02108-RA,Egulf20515-RA,Eaffi14558-RA,Egulf04469-RA,Eaff20092-RA,Egulf03243-RA,Eaffi…
Cellular component	spliceosomal tri-snRNP complex	GO:0097526	6	0.000164551	2.08226	23	52	2737	12885	Egulf11219-RA,Egulf11220-RA,Egulf01213-RA,Eaffi13243-RA,Eaff14371-RA,Eaff05248-RA,Egulf21007-RA,Eaff04847-RA,Egulf01305-RA,Eaff08856-RA,Eaff04849-RA,Eaff04846-RA,Eaff05026-RA,Eaffi12076-RA,Egulf11221-RA,Eaff08938-RA,Egulf11222-RA,Egulf01955-RA,Eaffi23867-RA,Eaff14372-RA,Egulf11677-RA,Eaffi13241-RA,Eaff04848-RA,
Cellular component	presynapse	GO:0098793	3	0.000166246	1.26989	181	671	2737	12885	Eaff06489-RA,Eaff09079-RA,Eaff09080-RA,Egulf21337-RA,Eaffi04572-RA,Eaffi07939-RA,Eaffi09126-RA,Egulf13360-RA,Eaffi23551-RA,Eaff18894-RA,Egulf16154-RA,Egulf18372-RA,Eaff19734-RA,Eaffi12423-RA,Egulf07470-RA,Eaff16264-RA,Eaff12097-RA,Eaff13502-RA,Egulf07916-RA,Eaff16598-RA,Eaff16787-RA,Eaffi16810-RA,Eaff11087-RA,Egulf00537-RA,Egulf00279-RA,Eaff01648-RA,Egulf22044-RA,Eaffi01328-RA,Eaff03120-RA,Eaff05…
Cellular component	postsynapse of neuromuscular junction	GO:0098975	4	0.000183015	2.42979	16	31	2737	12885	Eaffi06041-RA,Eaff16264-RA,Egulf18545-RA,Egulf15955-RA,Eaff03120-RA,Egulf09416-RA,Egulf15956-RA,Egulf13797-RA,Eaffi20204-RA,Egulf01294-RA,Eaff18682-RA,Egulf14301-RA,Eaffi03621-RA,Eaffi18746-RA,Egulf08016-RA,Egulf18543-RA,
Cellular component	Cul3-RING ubiquitin ligase complex	GO:0031463	7	0.000188741	2.18963	20	43	2737	12885	Eaff08581-RA,Eaff17989-RA,Egulf05014-RA,Eaffi16624-RA,Egulf12821-RA,Egulf15040-RA,Eaffi08546-RA,Egulf21554-RA,Egulf16936-RA,Eaff11907-RA,Eaffi16625-RA,Eaff16942-RA,Eaff19456-RA,Egulf12120-RA,Eaffi18731-RA,Egulf07439-RA,Eaff01259-RA,Eaffi04190-RA,Egulf00905-RA,Eaff17470-RA,
Cellular component	messenger ribonucleoprotein complex	GO:1990124	4	0.000190952	2.35385	17	34	2737	12885	Eaffi16011-RA,Eaff17411-RA,Eaffi19879-RA,Eaff13393-RA,Eaff17428-RA,Eaffi08302-RA,Eaff19413-RA,Eaffi02108-RA,Egulf03243-RA,Egulf16871-RA,Egulf12193-RA,Eaff08790-RA,Eaffi08301-RA,Egulf01142-RA,Eaffi00699-RA,Egulf17964-RA,Eaff14990-RA,
Cellular component	transcription factor TFIIH core complex	GO:0000439	5	0.000191186	3.13847	10	15	2737	12885	Eaff14062-RA,Egulf02290-RA,Egulf02289-RA,Eaffi12190-RA,Egulf02287-RA,Eaff15389-RA,Egulf17381-RA,Eaff14063-RA,Eaff14061-RA,Egulf02288-RA,
Cellular component	obsolete integral component of synaptic vesicle membrane	GO:0030285	0	0.000350664	2.03078	22	51	2737	12885	Egulf07470-RA,Eaff13502-RA,Eaff16787-RA,Eaff01648-RA,Eaffi01328-RA,Egulf04927-RA,Egulf10849-RA,Egulf02856-RA,Eaff11986-RA,Eaffi04079-RA,Egulf11685-RA,Eaff01292-RA,Egulf04928-RA,Eaff05258-RA,Egulf20678-RA,Eaff11984-RA,Egulf13030-RA,Eaffi16722-RA,Eaff07012-RA,Egulf07844-RA,Eaffi13744-RA,Eaff11985-RA,
Cellular component	obsolete cell-substrate adherens junction	GO:0005924	0	0.000352732	1.52466	57	176	2737	12885	Egulf15541-RA,Eaffi06041-RA,Egulf15820-RA,Eaff11447-RA,Eaff16419-RA,Egulf14468-RA,Eaff04817-RA,Eaff11639-RA,Egulf07916-RA,Eaff12603-RA,Egulf18545-RA,Eaff04981-RA,Egulf00181-RA,Egulf04927-RA,Eaff18111-RA,Egulf22158-RA,Egulf05581-RA,Eaff00927-RA,Eaff17432-RA,Egulf05016-RA,Egulf00184-RA,Egulf04030-RA,Egulf11185-RA,Eaff15799-RA,Eaff11986-RA,Egulf12162-RA,Eaffi04079-RA,Egulf07041-RA,Eaffi11935-RA,Eaff…
Cellular component	M band	GO:0031430	3	0.000380928	1.71189	36	99	2737	12885	Eaff11931-RA,Eaff11639-RA,Eaffi05569-RA,Eaff09656-RA,Eaffi14578-RA,Eaffi02849-RA,Eaff17002-RA,Egulf13034-RA,Egulf22296-RA,Egulf04992-RA,Eaff06505-RA,Eaffi04095-RA,Egulf18288-RA,Egulf04030-RA,Eaffi01137-RA,Eaff19860-RA,Eaffi01141-RA,Eaffi16715-RA,Eaffi16653-RA,Egulf05346-RA,Eaffi18458-RA,Eaffi03115-RA,Egulf22300-RA,Eaffi04579-RA,Eaff12898-RA,Eaff11975-RA,Egulf03826-RA,Eaff12726-RA,Egulf19704-RA,Eg…
Cellular component	cell cortex	GO:0005938	4	0.00038142	1.26958	161	597	2737	12885	Eaffi21345-RA,Egulf06159-RA,Eaffi18953-RA,Eaff14226-RA,Eaffi06041-RA,Eaff17998-RA,Egulf14305-RA,Egulf01414-RA,Eaff06515-RA,Egulf18372-RA,Eaff11203-RA,Eaffi13736-RA,Eaffi11171-RA,Eaffi23452-RA,Eaff09039-RA,Eaff09599-RA,Egulf21098-RA,Eaffi08671-RA,Egulf18545-RA,Eaff13289-RA,Egulf22044-RA,Eaff05681-RA,Eaff20005-RA,Eaff15663-RA,Eaff09736-RA,Egulf12386-RA,Eaffi08714-RA,Egulf00940-RA,Eaff01401-RA,Egulf…
Cellular component	transcription export complex	GO:0000346	4	0.00040119	2.55001	13	24	2737	12885	Egulf03839-RA,Egulf19030-RA,Egulf13259-RA,Eaff13603-RA,Eaff12885-RA,Eaff10345-RA,Egulf14895-RA,Eaff16653-RA,Egulf19031-RA,Egulf02756-RA,Eaff10346-RA,Eaffi24036-RA,Eaffi15853-RA,
Cellular component	GABA receptor complex	GO:1902710	4	0.000412669	2.94232	10	16	2737	12885	Egulf07470-RA,Eaff01648-RA,Eaffi01328-RA,Eaff01292-RA,Eaff08114-RA,Egulf00403-RA,Egulf20678-RA,Eaff08115-RA,Eaff07012-RA,Egulf07844-RA,
Cellular component	elongin complex	GO:0070449	5	0.000412669	2.94232	10	16	2737	12885	Eaff11203-RA,Eaff00669-RA,Eaffi05250-RA,Egulf04634-RA,Eaff12224-RA,Egulf05863-RA,Eaff18801-RA,Eaffi00678-RA,Egulf06739-RA,Eaffi03736-RA,
Cellular component	muscle cell projection	GO:0036194	5	0.000412669	2.94232	10	16	2737	12885	Eaffi03609-RA,Eaffi05191-RA,Egulf20006-RA,Egulf20437-RA,Eaff19766-RA,Egulf05920-RA,Egulf04513-RA,Eaffi15191-RA,Eaff06783-RA,Eaff11137-RA,
Cellular component	tight junction	GO:0070160	6	0.000427171	1.50855	58	181	2737	12885	Egulf20802-RA,Eaffi00389-RA,Eaffi13736-RA,Egulf21938-RA,Eaff09599-RA,Egulf18406-RA,Eaffi21837-RA,Eaffi19291-RA,Eaffi05864-RA,Eaff19987-RA,Eaffi19287-RA,Egulf07745-RA,Egulf08360-RA,Eaffi18218-RA,Eaffi07240-RA,Eaffi20926-RA,Eaffi18038-RA,Egulf18400-RA,Eaff09762-RA,Egulf08691-RA,Eaff00400-RA,Egulf11522-RA,Egulf09324-RA,Eaffi05196-RA,Egulf04479-RA,Eaff12348-RA,Eaffi01858-RA,Eaffi03193-RA,Eaff05782-RA…
Cellular component	microtubule organizing center attachment site	GO:0034992	3	0.000431222	4.70771	5	5	2737	12885	Egulf07071-RA,Eaffi11117-RA,Egulf10635-RA,Eaff04335-RA,Eaff00959-RA,
Cellular component	meiotic nuclear membrane microtubule tethering complex	GO:0034993	6	0.000431222	4.70771	5	5	2737	12885	Egulf07071-RA,Eaffi11117-RA,Egulf10635-RA,Eaff04335-RA,Eaff00959-RA,
Cellular component	obsolete transforming growth factor beta receptor complex	GO:0070022	0	0.000431222	4.70771	5	5	2737	12885	Egulf20802-RA,Eaffi20926-RA,Egulf08691-RA,Eaff02009-RA,Eaff07111-RA,
Cellular component	obsolete anchored component of the cytoplasmic side of the plasma membrane	GO:0098753	0	0.000431222	4.70771	5	5	2737	12885	Eaffi16694-RA,Eaff17367-RA,Eaff15853-RA,Egulf14413-RA,Egulf12247-RA,
Cellular component	terminal cisterna	GO:0014802	5	0.000431222	4.70771	5	5	2737	12885	Eaff20005-RA,Egulf05093-RA,Eaff11833-RA,Eaffi04288-RA,Eaffi04286-RA,
Cellular component	apical cytoplasm	GO:0090651	3	0.000431222	4.70771	5	5	2737	12885	Eaff10921-RA,Eaff10923-RA,Eaffi07254-RA,Egulf19516-RA,Eaff10922-RA,
Cellular component	methionine adenosyltransferase complex	GO:0048269	5	0.000431222	4.70771	5	5	2737	12885	Eaff07804-RA,Egulf00032-RA,Eaff00672-RA,Eaffi00679-RA,Egulf06741-RA,
Cellular component	multivesicular body, internal vesicle lumen	GO:0097489	6	0.000431222	4.70771	5	5	2737	12885	Eaff06642-RA,Eaffi14283-RA,Egulf20978-RA,Eaff06644-RA,Eaff06643-RA,
Cellular component	calyx of Held	GO:0044305	5	0.000431222	4.70771	5	5	2737	12885	Egulf18372-RA,Eaff09736-RA,Egulf18370-RA,Eaffi05822-RA,Egulf18371-RA,
Cellular component	nuclear membrane protein complex	GO:0106083	4	0.000431222	4.70771	5	5	2737	12885	Egulf07071-RA,Eaffi11117-RA,Egulf10635-RA,Eaff04335-RA,Eaff00959-RA,
Cellular component	nuclear membrane microtubule tethering complex	GO:0106094	5	0.000431222	4.70771	5	5	2737	12885	Egulf07071-RA,Eaffi11117-RA,Egulf10635-RA,Eaff04335-RA,Eaff00959-RA,
Cellular component	cell leading edge cell cortex	GO:1904269	6	0.000431222	4.70771	5	5	2737	12885	Eaffi13736-RA,Egulf08360-RA,Egulf11678-RA,Eaff05249-RA,Eaff02354-RA,
Cellular component	ryanodine receptor complex	GO:1990425	9	0.000431222	4.70771	5	5	2737	12885	Eaff20005-RA,Egulf05093-RA,Eaff11833-RA,Eaffi04288-RA,Eaffi04286-RA,
Cellular component	striated muscle thin filament	GO:0005865	4	0.000459281	2.28253	16	33	2737	12885	Eaff17680-RA,Eaffi02849-RA,Eaff12184-RA,Eaff16646-RA,Egulf13362-RA,Eaffi02034-RA,Egulf04685-RA,Egulf04219-RA,Eaffi09979-RA,Eaffi15872-RA,Eaffi03332-RA,Eaff01814-RA,Egulf08128-RA,Eaff12558-RA,Egulf13280-RA,Eaffi03802-RA,
Cellular component	gamma-tubulin small complex	GO:0008275	4	0.000463608	3.66155	7	9	2737	12885	Eaff05180-RA,Eaffi07840-RA,Egulf11600-RA,Eaffi13658-RA,Eaff05181-RA,Eaffi13659-RA,Eaff05182-RA,
Cellular component	TEAD-YAP complex	GO:0140552	5	0.000463608	3.66155	7	9	2737	12885	Egulf13179-RA,Egulf12268-RA,Eaff17293-RA,Eaffi16209-RA,Eaffi15724-RA,Eaff17335-RA,Egulf12369-RA,
Cellular component	DNA replication factor A complex	GO:0005662	4	0.000463608	3.66155	7	9	2737	12885	Egulf05132-RA,Eaff13393-RA,Eaffi02108-RA,Egulf12333-RA,Egulf03243-RA,Egulf17964-RA,Eaff14990-RA,
Cellular component	egg chorion	GO:0042600	4	0.000463608	3.66155	7	9	2737	12885	Eaff10921-RA,Egulf19517-RA,Eaff10923-RA,Eaffi07254-RA,Egulf19516-RA,Eaff10922-RA,Egulf19519-RA,
Cellular component	cell-substrate junction	GO:0030055	5	0.000499405	1.50026	58	182	2737	12885	Egulf15541-RA,Eaffi06041-RA,Egulf15820-RA,Eaff11447-RA,Eaff16419-RA,Egulf14468-RA,Eaff04817-RA,Eaff11639-RA,Egulf07916-RA,Eaff12603-RA,Egulf18545-RA,Eaff04981-RA,Egulf00181-RA,Egulf04927-RA,Eaff18111-RA,Egulf22158-RA,Egulf05581-RA,Eaff00927-RA,Eaffi03760-RA,Eaff17432-RA,Egulf05016-RA,Egulf00184-RA,Egulf04030-RA,Egulf11185-RA,Eaff15799-RA,Eaff11986-RA,Egulf12162-RA,Eaffi04079-RA,Egulf07041-RA,Eaff…
Cellular component	dendritic branch	GO:0044307	7	0.000523897	4.03518	6	7	2737	12885	Egulf13360-RA,Eaff16598-RA,Egulf19416-RA,Eaffi15959-RA,Eaff16597-RA,Eaffi15958-RA,
Cellular component	ESC/E(Z) complex	GO:0035098	7	0.000532013	2.72552	11	19	2737	12885	Eaffi18129-RA,Egulf09394-RA,Eaff08341-RA,Eaff16174-RA,Eaffi18131-RA,Egulf05542-RA,Egulf13913-RA,Eaffi04825-RA,Egulf00635-RA,Eaff11480-RA,Eaff03108-RA,
Cellular component	GAIT complex	GO:0097452	3	0.000609145	3.02638	9	14	2737	12885	Eaff11931-RA,Egulf15955-RA,Egulf13034-RA,Egulf04992-RA,Egulf15956-RA,Eaffi16715-RA,Eaffi20204-RA,Eaff18682-RA,Eaff16785-RA,
Cellular component	specific granule membrane	GO:0035579	8	0.000624599	1.73157	32	87	2737	12885	Eaff09690-RA,Eaff11639-RA,Eaff03814-RA,Egulf14013-RA,Egulf07549-RA,Egulf04030-RA,Eaff12436-RA,Eaffi20190-RA,Eaff01192-RA,Egulf11950-RA,Eaff12110-RA,Eaff19401-RA,Egulf18312-RA,Eaffi00359-RA,Eaffi03497-RA,Egulf04379-RA,Egulf05346-RA,Egulf17820-RA,Egulf17227-RA,Eaffi03115-RA,Eaffi04579-RA,Eaff14890-RA,Eaff18744-RA,Eaff16103-RA,Egulf18362-RA,Eaff12726-RA,Eaff01374-RA,Eaffi05757-RA,Egulf04378-RA,Eaff0…
Cellular component	excitatory synapse	GO:0060076	5	0.000644335	2.11847	18	40	2737	12885	Egulf13360-RA,Egulf18372-RA,Eaff16598-RA,Egulf04927-RA,Eaff09736-RA,Egulf18370-RA,Eaffi15959-RA,Eaff11986-RA,Eaffi04079-RA,Eaffi05822-RA,Egulf04928-RA,Eaff11984-RA,Egulf01081-RA,Egulf18371-RA,Eaff16597-RA,Eaffi15958-RA,Eaff08743-RA,Eaff11985-RA,
Cellular component	U4/U6 x U5 tri-snRNP complex	GO:0046540	7	0.00079435	2.00328	20	47	2737	12885	Egulf11219-RA,Egulf11220-RA,Egulf01213-RA,Eaffi13243-RA,Eaff14371-RA,Eaff04847-RA,Egulf01305-RA,Eaff08856-RA,Eaff04849-RA,Eaff04846-RA,Eaff05026-RA,Eaffi12076-RA,Egulf11221-RA,Eaff08938-RA,Egulf11222-RA,Egulf01955-RA,Eaffi23867-RA,Eaff14372-RA,Eaffi13241-RA,Eaff04848-RA,
Cellular component	presynaptic membrane	GO:0042734	6	0.000841108	1.52767	49	151	2737	12885	Eaff06489-RA,Eaff09079-RA,Eaff09080-RA,Egulf21337-RA,Eaffi07939-RA,Egulf18372-RA,Egulf07470-RA,Eaff01648-RA,Egulf22044-RA,Eaffi01328-RA,Eaff03120-RA,Eaff05681-RA,Egulf13623-RA,Eaff09736-RA,Egulf09416-RA,Egulf18192-RA,Egulf19242-RA,Eaff10566-RA,Egulf18370-RA,Egulf18239-RA,Eaff01292-RA,Eaffi05822-RA,Eaff15661-RA,Eaff09795-RA,Eaff09544-RA,Eaff10560-RA,Egulf14310-RA,Egulf20678-RA,Egulf01294-RA,Eaff09…
Cellular component	adherens junction	GO:0005912	6	0.000864689	1.33726	98	345	2737	12885	Egulf15541-RA,Eaffi06041-RA,Eaff17998-RA,Egulf15820-RA,Eaff11447-RA,Eaff16419-RA,Egulf14468-RA,Eaffi13736-RA,Eaff04817-RA,Eaffi23452-RA,Eaff11639-RA,Egulf07916-RA,Eaff09599-RA,Eaff12603-RA,Egulf18545-RA,Eaff01879-RA,Eaff04981-RA,Egulf00181-RA,Egulf04927-RA,Eaff18111-RA,Eaff06883-RA,Egulf08360-RA,Egulf22158-RA,Egulf05581-RA,Eaff00927-RA,Eaff17432-RA,Egulf18979-RA,Eaff02678-RA,Egulf05016-RA,Egulf00…
Cellular component	cell surface	GO:0009986	3	0.000963736	1.28121	129	474	2737	12885	Eaff06489-RA,Egulf20802-RA,Egulf13360-RA,Eaff10158-RA,Egulf09425-RA,Eaff16419-RA,Egulf17362-RA,Eaff11639-RA,Egulf10934-RA,Eaff16598-RA,Eaff02324-RA,Eaff03977-RA,Egulf16380-RA,Eaffi11588-RA,Egulf13623-RA,Eaff13349-RA,Egulf19943-RA,Eaff04968-RA,Eaff17289-RA,Eaff13808-RA,Egulf02145-RA,Eaff05947-RA,Eaff07643-RA,Egulf01899-RA,Eaffi13417-RA,Eaff10850-RA,Eaffi01325-RA,Eaff03814-RA,Egulf18192-RA,Eaffi209…
Cellular component	main axon	GO:0044304	3	0.00097921	1.69266	32	89	2737	12885	Eaff06489-RA,Egulf19416-RA,Egulf13623-RA,Egulf18192-RA,Egulf22296-RA,Egulf19242-RA,Eaff10566-RA,Egulf18239-RA,Eaff09795-RA,Eaff09544-RA,Eaff10560-RA,Eaff09600-RA,Eaffi05420-RA,Eaffi18458-RA,Egulf22300-RA,Eaff12492-RA,Eaffi21188-RA,Eaffi03418-RA,Eaff17938-RA,Egulf18432-RA,Eaffi19495-RA,Egulf19704-RA,Egulf04295-RA,Eaff05216-RA,Egulf14360-RA,Eaffi19331-RA,Eaff09545-RA,Egulf19250-RA,Eaff15713-RA,Egul…
Cellular component	basal cortex	GO:0045180	6	0.00098238	2.10608	17	38	2737	12885	Eaff10167-RA,Egulf18190-RA,Eaff09541-RA,Eaffi05417-RA,Egulf18840-RA,Eaff10921-RA,Eaff18793-RA,Egulf19517-RA,Eaff10923-RA,Eaffi07254-RA,Egulf16112-RA,Egulf19516-RA,Eaffi20353-RA,Eaff10922-RA,Egulf19519-RA,Eaff02391-RA,Egulf11336-RA,
Cellular component	outer dynein arm	GO:0036157	6	0.00104511	2.4562	12	23	2737	12885	Egulf05152-RA,Eaff08256-RA,Egulf12491-RA,Eaff11782-RA,Egulf10359-RA,Eaffi04354-RA,Eaff18245-RA,Egulf15653-RA,Egulf02100-RA,Eaff17198-RA,Egulf00553-RA,Eaff14235-RA,
Cellular component	ATPase complex	GO:1904949	4	0.00105615	1.37744	79	270	2737	12885	Eaffi04572-RA,Egulf15820-RA,Eaffi00389-RA,Egulf14468-RA,Egulf21938-RA,Eaff12097-RA,Eaffi04334-RA,Eaffi03763-RA,Egulf18406-RA,Eaffi21837-RA,Eaff04981-RA,Egulf00181-RA,Eaff11643-RA,Eaffi19291-RA,Egulf10646-RA,Eaffi05864-RA,Eaff18111-RA,Eaff19987-RA,Eaffi19287-RA,Egulf07745-RA,Eaffi18218-RA,Eaffi07240-RA,Eaff11825-RA,Egulf05340-RA,Eaffi18038-RA,Eaff13446-RA,Egulf18400-RA,Eaff17432-RA,Egulf00184-RA,E…
Cellular component	intracellular vesicle	GO:0097708	6	0.00111007	1.11858	508	2138	2737	12885	Eaff06489-RA,Egulf20802-RA,Egulf21337-RA,Eaffi04572-RA,Egulf12619-RA,Eaffi08361-RA,Eaff11931-RA,Eaffi08922-RA,Egulf13360-RA,Eaffi15139-RA,Eaffi18953-RA,Eaffi06179-RA,Egulf01364-RA,Egulf11560-RA,Eaffi11531-RA,Eaff17998-RA,Egulf14305-RA,Eaff18894-RA,Eaff09690-RA,Eaffi00389-RA,Egulf16154-RA,Eaff16419-RA,Egulf15782-RA,Egulf18372-RA,Egulf21488-RA,Eaffi21676-RA,Egulf21235-RA,Eaff10441-RA,Eaff05626-RA,E…
Cellular component	membrane	GO:0016020	3	0.0011771	1.05847	1280	5693	2737	12885	Eaffi21345-RA,Eaffi21906-RA,Eaff06489-RA,Egulf20802-RA,Eaff15515-RA,Eaff09079-RA,Eaff09080-RA,Egulf21337-RA,Eaffi04572-RA,Eaff07460-RA,Eaff01338-RA,Eaff11702-RA,Eaffi07939-RA,Egulf06159-RA,Eaffi16694-RA,Eaffi08361-RA,Eaff11931-RA,Eaff17478-RA,Eaffi09126-RA,Eaffi08922-RA,Egulf16993-RA,Egulf13360-RA,Eaffi06167-RA,Eaff10158-RA,Egulf09425-RA,Eaff04284-RA,Eaffi15139-RA,Eaffi18953-RA,Eaff15732-RA,Eaff1…
Cellular component	receptor complex	GO:0043235	3	0.0011785	1.4023	70	235	2737	12885	Egulf20802-RA,Egulf03455-RA,Egulf13360-RA,Egulf15807-RA,Eaff11639-RA,Egulf07470-RA,Eaffi02363-RA,Eaff16598-RA,Eaff01648-RA,Eaffi01328-RA,Eaff03120-RA,Eaff06883-RA,Egulf09416-RA,Egulf18192-RA,Eaffi14602-RA,Eaffi20926-RA,Egulf19242-RA,Egulf18979-RA,Eaff10566-RA,Egulf04030-RA,Egulf08691-RA,Eaffi15959-RA,Eaff06884-RA,Egulf18239-RA,Eaff01192-RA,Eaff01292-RA,Egulf11950-RA,Egulf05049-RA,Eaff08114-RA,Eaf…
Cellular component	chromocenter	GO:0010369	6	0.00119441	1.9877	19	45	2737	12885	Egulf01655-RA,Eaff12209-RA,Egulf18605-RA,Egulf04503-RA,Eaff09789-RA,Eaff09269-RA,Eaff12096-RA,Egulf04469-RA,Egulf01905-RA,Eaff02984-RA,Eaffi04050-RA,Eaff10371-RA,Eaff12062-RA,Eaffi11965-RA,Eaffi05893-RA,Eaff14428-RA,Egulf19056-RA,Eaffi03598-RA,Eaffi03425-RA,
Cellular component	acrosomal vesicle	GO:0001669	10	0.00121481	1.67385	32	90	2737	12885	Egulf12619-RA,Eaff11931-RA,Eaff09690-RA,Eaffi21676-RA,Eaff05626-RA,Egulf17829-RA,Eaff14897-RA,Egulf13034-RA,Eaff05741-RA,Egulf04992-RA,Egulf04548-RA,Egulf18312-RA,Eaffi02733-RA,Eaffi16715-RA,Eaffi03647-RA,Eaffi11117-RA,Eaffi22638-RA,Eaff12957-RA,Egulf10635-RA,Eaff14896-RA,Egulf15991-RA,Egulf21983-RA,Eaffi21675-RA,Eaffi21805-RA,Eaff04335-RA,Egulf12967-RA,Egulf22101-RA,Eaffi16769-RA,Eaff16785-RA,Ea…
Cellular component	dendrite	GO:0030425	6	0.0012285	1.19561	224	882	2737	12885	Eaffi21345-RA,Eaff06489-RA,Eaff01338-RA,Eaffi09126-RA,Egulf13360-RA,Eaff00291-RA,Egulf09425-RA,Eaff17998-RA,Eaff09690-RA,Eaff01084-RA,Eaff06515-RA,Eaff18129-RA,Egulf17362-RA,Eaff03916-RA,Eaff11639-RA,Egulf22131-RA,Egulf21938-RA,Egulf07470-RA,Eaff13502-RA,Egulf05014-RA,Eaff16598-RA,Eaff16787-RA,Eaffi04076-RA,Eaffi16810-RA,Eaffi14067-RA,Eaff02324-RA,Eaffi01410-RA,Eaffi01840-RA,Egulf19416-RA,Egulf18…
Cellular component	cortical cytoskeleton	GO:0030863	7	0.00124105	1.52503	46	142	2737	12885	Eaffi21345-RA,Eaff14226-RA,Eaff17998-RA,Egulf14305-RA,Eaff01401-RA,Eaff12184-RA,Egulf03789-RA,Egulf22296-RA,Egulf22158-RA,Egulf15166-RA,Egulf05016-RA,Eaffi02034-RA,Egulf04685-RA,Egulf04219-RA,Egulf02111-RA,Eaff12924-RA,Eaff18616-RA,Eaffi03332-RA,Eaffi18458-RA,Egulf22300-RA,Eaff03567-RA,Egulf11257-RA,Eaff10821-RA,Eaff01656-RA,Eaff01814-RA,Eaff15658-RA,Eaff16902-RA,Egulf08128-RA,Eaffi20262-RA,Eaffi…
Cellular component	GABA-A receptor complex	GO:1902711	5	0.00126078	3.2954	7	10	2737	12885	Egulf07470-RA,Eaff01648-RA,Eaffi01328-RA,Eaff01292-RA,Egulf20678-RA,Eaff07012-RA,Egulf07844-RA,
Cellular component	gamma-tubulin complex	GO:0000930	3	0.00126078	3.2954	7	10	2737	12885	Eaff05180-RA,Eaffi07840-RA,Egulf11600-RA,Eaffi13658-RA,Eaff05181-RA,Eaffi13659-RA,Eaff05182-RA,
Cellular component	activin receptor complex	GO:0048179	8	0.00126078	3.2954	7	10	2737	12885	Egulf20802-RA,Eaffi20926-RA,Egulf08691-RA,Eaff02009-RA,Egulf20016-RA,Eaff07515-RA,Eaff07111-RA,
Cellular component	dendritic tree	GO:0097447	6	0.00130776	1.19425	224	883	2737	12885	Eaffi21345-RA,Eaff06489-RA,Eaff01338-RA,Eaffi09126-RA,Egulf13360-RA,Eaff00291-RA,Egulf09425-RA,Eaff17998-RA,Eaff09690-RA,Eaff01084-RA,Eaff06515-RA,Eaff18129-RA,Egulf17362-RA,Eaff03916-RA,Eaff11639-RA,Egulf22131-RA,Egulf21938-RA,Egulf07470-RA,Eaff13502-RA,Egulf05014-RA,Eaff16598-RA,Eaff16787-RA,Eaffi04076-RA,Eaffi16810-RA,Eaffi14067-RA,Eaff02324-RA,Eaffi01410-RA,Eaffi01840-RA,Egulf19416-RA,Egulf18…
Cellular component	cytoplasmic vesicle	GO:0031410	7	0.00131208	1.11678	506	2133	2737	12885	Eaff06489-RA,Egulf20802-RA,Egulf21337-RA,Eaffi04572-RA,Egulf12619-RA,Eaffi08361-RA,Eaff11931-RA,Eaffi08922-RA,Egulf13360-RA,Eaffi15139-RA,Eaffi18953-RA,Eaffi06179-RA,Egulf01364-RA,Egulf11560-RA,Eaffi11531-RA,Eaff17998-RA,Egulf14305-RA,Eaff18894-RA,Eaff09690-RA,Eaffi00389-RA,Egulf16154-RA,Eaff16419-RA,Egulf15782-RA,Egulf18372-RA,Egulf21488-RA,Eaffi21676-RA,Egulf21235-RA,Eaff10441-RA,Eaff05626-RA,E…
Cellular component	site of polarized growth	GO:0030427	3	0.00133977	1.3271	95	337	2737	12885	Eaffi21345-RA,Egulf21337-RA,Eaff01338-RA,Egulf13360-RA,Eaffi18953-RA,Eaffi06041-RA,Eaff17998-RA,Eaff06515-RA,Eaff16598-RA,Eaffi04076-RA,Eaffi01840-RA,Egulf19416-RA,Egulf18134-RA,Egulf21098-RA,Eaffi08671-RA,Egulf18545-RA,Egulf22044-RA,Eaff17411-RA,Eaff05681-RA,Eaff15663-RA,Egulf04927-RA,Egulf05810-RA,Eaff12318-RA,Eaff11236-RA,Egulf14314-RA,Egulf16277-RA,Egulf18192-RA,Eaffi08670-RA,Eaffi21965-RA,Eg…
Cellular component	azurophil granule membrane	GO:0035577	9	0.00142599	1.83521	23	59	2737	12885	Egulf04047-RA,Eaff08325-RA,Eaffi06456-RA,Eaff12436-RA,Eaff12110-RA,Eaff19401-RA,Eaff12710-RA,Eaffi00359-RA,Eaffi03497-RA,Egulf04379-RA,Eaff16185-RA,Egulf17820-RA,Egulf17227-RA,Eaff14890-RA,Eaff10225-RA,Eaffi08824-RA,Egulf18362-RA,Eaffi03142-RA,Egulf00618-RA,Egulf04378-RA,Eaff09726-RA,Eaff12648-RA,Egulf02013-RA,
Cellular component	intercalated disc	GO:0014704	7	0.00151246	1.61539	35	102	2737	12885	Egulf21938-RA,Egulf18406-RA,Eaffi21837-RA,Eaffi05864-RA,Eaff19987-RA,Egulf07745-RA,Eaffi07240-RA,Eaffi18038-RA,Egulf18400-RA,Eaff09762-RA,Egulf04479-RA,Eaff09487-RA,Eaff12348-RA,Egulf04548-RA,Eaffi02733-RA,Eaffi03647-RA,Eaff05782-RA,Eaff12957-RA,Eaff18149-RA,Egulf15991-RA,Eaff16080-RA,Eaff01559-RA,Egulf18367-RA,Eaff09732-RA,Egulf15768-RA,Egulf01323-RA,Egulf09502-RA,Eaff09765-RA,Egulf18404-RA,Egul…
Cellular component	PcG protein complex	GO:0031519	4	0.00163476	1.94449	19	46	2737	12885	Eaffi18129-RA,Eaff12159-RA,Egulf09394-RA,Eaffi02965-RA,Eaff08341-RA,Eaff16174-RA,Egulf21900-RA,Eaffi18131-RA,Egulf05542-RA,Egulf13913-RA,Eaff12883-RA,Eaffi04825-RA,Egulf00635-RA,Eaff11480-RA,Eaff03108-RA,Eaff07289-RA,Eaff07719-RA,Eaff05828-RA,Eaff12844-RA,
Cellular component	muscle cell postsynaptic specialization	GO:0097482	5	0.00168904	2.35385	12	24	2737	12885	Eaffi06041-RA,Eaff16264-RA,Egulf18545-RA,Eaff03120-RA,Egulf09416-RA,Egulf13797-RA,Egulf01294-RA,Egulf14301-RA,Eaffi03621-RA,Eaffi18746-RA,Egulf08016-RA,Egulf18543-RA,
Cellular component	septin complex	GO:0031105	3	0.00171644	3.53078	6	8	2737	12885	Egulf06159-RA,Egulf12386-RA,Eaff00148-RA,Eaffi00120-RA,Egulf10386-RA,Eaff04063-RA,
Cellular component	glutamate-cysteine ligase complex	GO:0017109	4	0.00171644	3.53078	6	8	2737	12885	Eaffi14977-RA,Egulf19785-RA,Eaff07715-RA,Eaffi14979-RA,Eaffi14978-RA,Egulf19786-RA,
Cellular component	alphav-beta3 integrin-IGF-1-IGF1R complex	GO:0035867	5	0.00171644	3.53078	6	8	2737	12885	Eaff11639-RA,Egulf04030-RA,Egulf05346-RA,Eaffi03115-RA,Eaffi04579-RA,Eaff12726-RA,
Cellular component	alphav-beta3 integrin-HMGB1 complex	GO:0035868	5	0.00171644	3.53078	6	8	2737	12885	Eaff11639-RA,Egulf04030-RA,Egulf05346-RA,Eaffi03115-RA,Eaffi04579-RA,Eaff12726-RA,
Cellular component	alphav-beta3 integrin-vitronectin complex	GO:0071062	5	0.00171644	3.53078	6	8	2737	12885	Eaff11639-RA,Egulf04030-RA,Egulf05346-RA,Eaffi03115-RA,Eaffi04579-RA,Eaff12726-RA,
Cellular component	septin cytoskeleton	GO:0032156	7	0.00171644	3.53078	6	8	2737	12885	Egulf06159-RA,Egulf12386-RA,Eaff00148-RA,Eaffi00120-RA,Egulf10386-RA,Eaff04063-RA,
Cellular component	septin ring	GO:0005940	8	0.00171644	3.53078	6	8	2737	12885	Egulf06159-RA,Egulf12386-RA,Eaff00148-RA,Eaffi00120-RA,Egulf10386-RA,Eaff04063-RA,
Cellular component	integrin alpha8-beta1 complex	GO:0034678	7	0.00171644	3.53078	6	8	2737	12885	Eaff11639-RA,Egulf04030-RA,Egulf05346-RA,Eaffi03115-RA,Eaffi04579-RA,Eaff12726-RA,
Cellular component	integrin alphav-beta3 complex	GO:0034683	7	0.00171644	3.53078	6	8	2737	12885	Eaff11639-RA,Egulf04030-RA,Egulf05346-RA,Eaffi03115-RA,Eaffi04579-RA,Eaff12726-RA,
Cellular component	growth cone	GO:0030426	4	0.00173425	1.33011	89	315	2737	12885	Eaffi21345-RA,Egulf21337-RA,Eaff01338-RA,Egulf13360-RA,Eaffi18953-RA,Eaffi06041-RA,Eaff17998-RA,Eaff16598-RA,Eaffi04076-RA,Eaffi01840-RA,Egulf19416-RA,Egulf18134-RA,Eaffi08671-RA,Egulf18545-RA,Egulf22044-RA,Eaff17411-RA,Eaff05681-RA,Eaff15663-RA,Egulf04927-RA,Egulf05810-RA,Eaff11236-RA,Egulf14314-RA,Egulf16277-RA,Egulf18192-RA,Eaffi08670-RA,Eaffi21965-RA,Egulf19242-RA,Eaff10566-RA,Eaffi23474-RA,E…
Cellular component	photoreceptor outer segment membrane	GO:0042622	7	0.00187638	2.89705	8	13	2737	12885	Eaffi16810-RA,Eaffi01410-RA,Eaff11178-RA,Eaff18470-RA,Egulf19665-RA,Egulf05891-RA,Eaffi03605-RA,Egulf14548-RA,
Cellular component	vesicle	GO:0031982	5	0.00206591	1.10832	525	2230	2737	12885	Eaff06489-RA,Egulf20802-RA,Egulf21337-RA,Eaffi04572-RA,Egulf12619-RA,Eaffi08361-RA,Eaff11931-RA,Eaffi09126-RA,Eaffi08922-RA,Egulf13360-RA,Eaffi15139-RA,Eaffi18953-RA,Eaffi06179-RA,Egulf01364-RA,Egulf11560-RA,Eaffi11531-RA,Eaff17998-RA,Egulf14305-RA,Eaff18894-RA,Eaff09690-RA,Eaffi00389-RA,Egulf16154-RA,Eaff16419-RA,Egulf15782-RA,Egulf18372-RA,Egulf21488-RA,Eaffi21676-RA,Egulf21235-RA,Eaff10441-RA,…
Cellular component	actin-based cell projection	GO:0098858	5	0.00208848	1.35	78	272	2737	12885	Eaff06489-RA,Eaff01338-RA,Eaffi18953-RA,Eaff09690-RA,Eaff11639-RA,Eaffi04076-RA,Eaffi01840-RA,Eaffi19542-RA,Eaffi08671-RA,Eaffi13587-RA,Egulf13623-RA,Eaff15663-RA,Eaff13187-RA,Egulf14314-RA,Egulf22158-RA,Eaffi08670-RA,Eaffi01177-RA,Egulf05016-RA,Egulf04030-RA,Egulf06439-RA,Egulf11522-RA,Egulf07507-RA,Eaff00403-RA,Egulf17769-RA,Eaff10921-RA,Eaff08446-RA,Eaff06642-RA,Eaffi01858-RA,Egulf18312-RA,Eaf…
Cellular component	pleated septate junction	GO:0005919	8	0.00229476	2.64809	9	16	2737	12885	Eaffi00389-RA,Eaffi19291-RA,Eaffi19287-RA,Eaffi18218-RA,Eaff00400-RA,Egulf09324-RA,Egulf21992-RA,Eaff03044-RA,Eaff05733-RA,
Cellular component	histone methyltransferase complex	GO:0035097	6	0.00231848	1.56924	36	108	2737	12885	Eaff11676-RA,Egulf15807-RA,Egulf05279-RA,Egulf01469-RA,Eaffi18129-RA,Egulf01470-RA,Eaff02506-RA,Eaffi04491-RA,Eaff15987-RA,Egulf09394-RA,Eaff15344-RA,Eaff08341-RA,Eaff16174-RA,Egulf17307-RA,Eaff09093-RA,Eaffi07912-RA,Eaffi00359-RA,Eaffi18131-RA,Eaffi23329-RA,Egulf17308-RA,Eaffi04490-RA,Egulf05542-RA,Egulf13913-RA,Eaffi04825-RA,Eaffi10856-RA,Egulf00635-RA,Eaff11480-RA,Eaff00234-RA,Egulf05278-RA,Ea…
Cellular component	obsolete plasma membrane bounded cell projection part	GO:0120038	0	0.0025086	1.12216	420	1762	2737	12885	Eaffi21345-RA,Eaff06489-RA,Egulf21337-RA,Eaff01338-RA,Eaff11931-RA,Eaff17478-RA,Eaffi09126-RA,Egulf13360-RA,Eaffi23551-RA,Eaff00291-RA,Egulf09425-RA,Eaff04284-RA,Eaffi18953-RA,Eaffi06041-RA,Eaff17998-RA,Eaff09690-RA,Eaff01084-RA,Eaff16419-RA,Eaff06515-RA,Egulf18372-RA,Eaff18129-RA,Egulf17362-RA,Eaffi12423-RA,Eaff19173-RA,Eaffi11171-RA,Eaff03916-RA,Eaff11639-RA,Egulf22131-RA,Egulf21938-RA,Egulf074…
Cellular component	obsolete cell projection part	GO:0044463	0	0.0025086	1.12216	420	1762	2737	12885	Eaffi21345-RA,Eaff06489-RA,Egulf21337-RA,Eaff01338-RA,Eaff11931-RA,Eaff17478-RA,Eaffi09126-RA,Egulf13360-RA,Eaffi23551-RA,Eaff00291-RA,Egulf09425-RA,Eaff04284-RA,Eaffi18953-RA,Eaffi06041-RA,Eaff17998-RA,Eaff09690-RA,Eaff01084-RA,Eaff16419-RA,Eaff06515-RA,Egulf18372-RA,Eaff18129-RA,Egulf17362-RA,Eaffi12423-RA,Eaff19173-RA,Eaffi11171-RA,Eaff03916-RA,Eaff11639-RA,Egulf22131-RA,Egulf21938-RA,Egulf074…
Cellular component	Z disc	GO:0030018	3	0.00267409	1.41737	56	186	2737	12885	Eaffi21345-RA,Eaff11931-RA,Eaff17998-RA,Eaffi15418-RA,Eaffi23452-RA,Eaffi05569-RA,Eaff09656-RA,Eaffi14578-RA,Eaffi02849-RA,Eaff20005-RA,Egulf07071-RA,Egulf07505-RA,Eaff17002-RA,Eaffi12714-RA,Egulf13034-RA,Egulf20214-RA,Egulf04992-RA,Eaff06505-RA,Eaffi04095-RA,Egulf05093-RA,Egulf18288-RA,Eaffi24020-RA,Eaffi01137-RA,Egulf08813-RA,Egulf07430-RA,Eaff02608-RA,Eaff19860-RA,Eaffi15419-RA,Eaffi01141-RA,E…
Cellular component	U2-type precatalytic spliceosome	GO:0071005	6	0.00269384	1.95198	17	41	2737	12885	Egulf11219-RA,Egulf11220-RA,Eaffi13243-RA,Eaff14371-RA,Eaff04847-RA,Egulf01305-RA,Eaff04849-RA,Eaff04846-RA,Eaff05026-RA,Eaffi12076-RA,Egulf11221-RA,Eaff08938-RA,Egulf11222-RA,Egulf01955-RA,Eaffi23867-RA,Eaffi13241-RA,Eaff04848-RA,
Cellular component	myosin VII complex	GO:0031477	5	0.00283114	2.99581	7	11	2737	12885	Eaff10921-RA,Egulf19517-RA,Eaff10923-RA,Eaffi07254-RA,Egulf19516-RA,Eaff10922-RA,Egulf19519-RA,
Cellular component	septate junction	GO:0005918	7	0.0028821	1.54146	37	113	2737	12885	Eaffi00389-RA,Egulf21938-RA,Eaff09599-RA,Egulf18406-RA,Eaffi21837-RA,Eaffi19291-RA,Eaffi05864-RA,Eaff19987-RA,Eaffi19287-RA,Egulf07745-RA,Eaffi18218-RA,Eaffi07240-RA,Eaffi18038-RA,Egulf18400-RA,Eaff09762-RA,Eaff00400-RA,Egulf09324-RA,Eaffi05196-RA,Egulf04479-RA,Eaff12348-RA,Eaff05782-RA,Egulf21992-RA,Egulf18126-RA,Eaff01559-RA,Eaff03044-RA,Egulf09502-RA,Egulf07571-RA,Eaff05733-RA,Egulf02384-RA,Ea…
Cellular component	secretory vesicle	GO:0099503	8	0.00320407	1.16504	245	990	2737	12885	Egulf21337-RA,Eaffi04572-RA,Egulf12619-RA,Eaffi08361-RA,Eaff11931-RA,Egulf13360-RA,Egulf01364-RA,Eaffi11531-RA,Eaff17998-RA,Egulf14305-RA,Eaff18894-RA,Eaff09690-RA,Egulf15782-RA,Egulf18372-RA,Eaffi21676-RA,Egulf21235-RA,Eaff10441-RA,Eaff05626-RA,Eaff11639-RA,Egulf07470-RA,Eaff12097-RA,Egulf13205-RA,Eaff13601-RA,Eaff13502-RA,Eaff16598-RA,Eaff16787-RA,Eaffi10278-RA,Eaff12475-RA,Egulf07265-RA,Eaffi1…
Cellular component	astral microtubule	GO:0000235	9	0.00322518	2.01759	15	35	2737	12885	Eaff11035-RA,Egulf13954-RA,Eaff14106-RA,Egulf02238-RA,Egulf03789-RA,Eaffi11705-RA,Eaff16146-RA,Eaff12924-RA,Eaffi05303-RA,Eaff14104-RA,Egulf02242-RA,Eaffi11709-RA,Egulf02243-RA,Eaffi05302-RA,Eaffi11707-RA,
Cellular component	ionotropic glutamate receptor complex	GO:0008328	7	0.00348975	2.05962	14	32	2737	12885	Egulf13360-RA,Eaff16598-RA,Eaff03120-RA,Egulf09416-RA,Eaffi15959-RA,Egulf05049-RA,Egulf01294-RA,Egulf01081-RA,Eaffi04227-RA,Eaff16597-RA,Eaffi03621-RA,Egulf08016-RA,Eaffi15958-RA,Eaff08743-RA,
Cellular component	investment cone	GO:0070865	3	0.00356603	2.69012	8	14	2737	12885	Eaffi18953-RA,Eaffi08671-RA,Eaff15663-RA,Egulf14314-RA,Eaffi08670-RA,Eaff08446-RA,Eaffi18954-RA,Egulf00743-RA,
Cellular component	cytoplasmic vesicle membrane	GO:0030659	6	0.00359511	1.17295	221	887	2737	12885	Eaff06489-RA,Eaffi08361-RA,Eaffi08922-RA,Eaffi15139-RA,Eaffi18953-RA,Egulf01364-RA,Eaff09690-RA,Eaffi00389-RA,Eaff16419-RA,Egulf18372-RA,Eaffi21676-RA,Eaff10441-RA,Eaff05626-RA,Eaff11639-RA,Egulf07470-RA,Eaff10212-RA,Egulf13205-RA,Eaff13502-RA,Eaff16787-RA,Eaffi16810-RA,Eaff16832-RA,Eaff03253-RA,Eaffi22405-RA,Egulf01012-RA,Eaffi08671-RA,Eaffi13587-RA,Eaff01648-RA,Egulf22044-RA,Egulf03616-RA,Egulf…
Cellular component	vesicle membrane	GO:0012506	5	0.00362285	1.17045	226	909	2737	12885	Eaff06489-RA,Eaffi08361-RA,Eaffi09126-RA,Eaffi08922-RA,Eaffi15139-RA,Eaffi18953-RA,Egulf01364-RA,Eaff09690-RA,Eaffi00389-RA,Eaff16419-RA,Egulf18372-RA,Eaffi21676-RA,Eaff10441-RA,Eaff05626-RA,Eaff11639-RA,Egulf07470-RA,Eaff10212-RA,Egulf13205-RA,Eaff13502-RA,Eaff16787-RA,Eaffi16810-RA,Eaff16832-RA,Eaff03253-RA,Eaffi22405-RA,Egulf01012-RA,Eaffi08671-RA,Eaffi13587-RA,Eaff01648-RA,Egulf22044-RA,Egulf…
Cellular component	neurotransmitter receptor complex	GO:0098878	6	0.00364308	1.9055	17	42	2737	12885	Egulf13360-RA,Eaff16598-RA,Eaff03120-RA,Egulf09416-RA,Eaffi15959-RA,Egulf05049-RA,Eaff08114-RA,Egulf00403-RA,Egulf01294-RA,Eaff08115-RA,Egulf01081-RA,Eaffi04227-RA,Eaff16597-RA,Eaffi03621-RA,Egulf08016-RA,Eaffi15958-RA,Eaff08743-RA,
Cellular component	spliceosomal complex	GO:0005681	4	0.00394863	1.2877	93	340	2737	12885	Eaff18703-RA,Egulf07306-RA,Egulf21619-RA,Egulf11219-RA,Egulf11220-RA,Egulf03839-RA,Eaffi16011-RA,Eaff15146-RA,Eaff06068-RA,Egulf01213-RA,Egulf07253-RA,Egulf15955-RA,Eaffi12239-RA,Eaffi01285-RA,Eaffi15933-RA,Egulf21377-RA,Egulf13675-RA,Egulf04607-RA,Egulf19030-RA,Eaffi13243-RA,Egulf04505-RA,Eaffi15366-RA,Eaffi19879-RA,Eaff14371-RA,Egulf17630-RA,Egulf13259-RA,Egulf15956-RA,Eaff12808-RA,Eaff05248-RA…
Cellular component	vacuolar proton-transporting V-type ATPase, V0 domain	GO:0000220	6	0.00396327	2.49232	9	17	2737	12885	Eaffi04572-RA,Eaff12097-RA,Eaffi03763-RA,Eaff11643-RA,Egulf05340-RA,Eaffi03762-RA,Eaff12098-RA,Egulf04652-RA,Eaff12207-RA,
Cellular component	proton-transporting V-type ATPase, V0 domain	GO:0033179	5	0.00396327	2.49232	9	17	2737	12885	Eaffi04572-RA,Eaff12097-RA,Eaffi03763-RA,Eaff11643-RA,Egulf05340-RA,Eaffi03762-RA,Eaff12098-RA,Egulf04652-RA,Eaff12207-RA,
Cellular component	platelet alpha granule lumen	GO:0031093	8	0.00410961	2.35385	10	20	2737	12885	Eaffi11531-RA,Eaff13601-RA,Egulf02757-RA,Eaff02253-RA,Egulf04717-RA,Egulf08450-RA,Eaff12155-RA,Eaffi11532-RA,Eaffi03845-RA,Eaff13602-RA,
Cellular component	tubulobulbar complex	GO:0036284	3	0.0042221	3.13847	6	9	2737	12885	Eaffi03609-RA,Eaffi05191-RA,Eaff19766-RA,Egulf05920-RA,Egulf04513-RA,Eaff11137-RA,
Cellular component	apicomedial cortex	GO:0106037	7	0.0042221	3.13847	6	9	2737	12885	Eaffi23452-RA,Egulf07430-RA,Eaffi01408-RA,Egulf17423-RA,Eaff01253-RA,Eaff15426-RA,
Cellular component	uniplex complex	GO:1990246	8	0.0042221	3.13847	6	9	2737	12885	Egulf19094-RA,Eaffi03328-RA,Egulf04216-RA,Eaff12561-RA,Eaffi06698-RA,Egulf19093-RA,
Cellular component	troponin complex	GO:0005861	3	0.0042221	3.13847	6	9	2737	12885	Eaff17680-RA,Eaff16646-RA,Egulf13362-RA,Eaffi09979-RA,Eaffi15872-RA,Egulf13280-RA,
Cellular component	cardiac Troponin complex	GO:1990584	4	0.0042221	3.13847	6	9	2737	12885	Eaff17680-RA,Eaff16646-RA,Egulf13362-RA,Eaffi09979-RA,Eaffi15872-RA,Egulf13280-RA,
Cellular component	obsolete integral component of organelle membrane	GO:0031301	0	0.00435707	1.35718	64	222	2737	12885	Eaffi21906-RA,Eaffi15139-RA,Egulf07470-RA,Eaff13502-RA,Eaff16787-RA,Eaff16832-RA,Eaff01648-RA,Egulf09059-RA,Eaffi01328-RA,Eaff20005-RA,Egulf04927-RA,Eaffi02212-RA,Egulf07538-RA,Eaff19703-RA,Egulf10849-RA,Eaff03814-RA,Egulf19094-RA,Eaff02834-RA,Eaff05866-RA,Egulf02856-RA,Egulf05093-RA,Eaff11986-RA,Eaffi04079-RA,Eaff02837-RA,Egulf11685-RA,Eaffi01523-RA,Egulf20217-RA,Eaff01292-RA,Eaff09004-RA,Egulf0…
Cellular component	obsolete intrinsic component of synaptic vesicle membrane	GO:0098563	0	0.00437321	1.72616	22	60	2737	12885	Egulf07470-RA,Eaff13502-RA,Eaff16787-RA,Eaff01648-RA,Eaffi01328-RA,Egulf04927-RA,Egulf10849-RA,Egulf02856-RA,Eaff11986-RA,Eaffi04079-RA,Egulf11685-RA,Eaff01292-RA,Egulf04928-RA,Eaff05258-RA,Egulf20678-RA,Eaff11984-RA,Egulf13030-RA,Eaffi16722-RA,Eaff07012-RA,Egulf07844-RA,Eaffi13744-RA,Eaff11985-RA,
Cellular component	obsolete sperm part	GO:0097223	0	0.00442912	1.37903	58	198	2737	12885	Egulf12619-RA,Eaff11931-RA,Eaff09690-RA,Eaffi21676-RA,Eaff19173-RA,Eaff05626-RA,Egulf17829-RA,Eaff17002-RA,Egulf12386-RA,Eaff07643-RA,Eaff14897-RA,Egulf13034-RA,Eaff05741-RA,Eaff00148-RA,Egulf03789-RA,Eaffi16611-RA,Egulf04992-RA,Egulf20133-RA,Eaff08256-RA,Egulf16551-RA,Egulf12491-RA,Eaff12924-RA,Egulf04548-RA,Egulf18312-RA,Eaff13251-RA,Eaffi02733-RA,Eaffi16715-RA,Eaffi03647-RA,Eaffi11117-RA,Eaffi…
Cellular component	pronucleus	GO:0045120	7	0.0048218	1.69183	23	64	2737	12885	Egulf01655-RA,Egulf18552-RA,Eaff19614-RA,Eaffi18129-RA,Eaffi06050-RA,Eaffi02155-RA,Egulf09394-RA,Eaff09269-RA,Eaffi08776-RA,Eaff08341-RA,Eaff16174-RA,Egulf18551-RA,Eaffi18131-RA,Egulf03283-RA,Egulf13913-RA,Eaff09890-RA,Eaff02984-RA,Egulf00635-RA,Eaff10371-RA,Eaff03108-RA,Eaffi06051-RA,Eaff08366-RA,Egulf19056-RA,
Cellular component	cortical actin cytoskeleton	GO:0030864	8	0.00538076	1.4998	36	113	2737	12885	Eaff14226-RA,Eaff17998-RA,Egulf14305-RA,Eaff12184-RA,Egulf22296-RA,Egulf22158-RA,Egulf05016-RA,Eaffi02034-RA,Egulf04685-RA,Egulf04219-RA,Egulf02111-RA,Eaffi03332-RA,Eaffi18458-RA,Egulf22300-RA,Eaff03567-RA,Egulf11257-RA,Eaff10821-RA,Eaff01814-RA,Eaff15658-RA,Eaff16902-RA,Egulf08128-RA,Eaffi10227-RA,Eaff12558-RA,Eaff04879-RA,Egulf12875-RA,Egulf19704-RA,Eaff11905-RA,Egulf14360-RA,Eaff05579-RA,Egulf…
Cellular component	obsolete telomeric heterochromatin	GO:0031933	0	0.00555332	2.74616	7	12	2737	12885	Eaff12209-RA,Egulf04503-RA,Eaff12096-RA,Egulf04469-RA,Eaff12062-RA,Eaffi03598-RA,Eaffi03425-RA,
Cellular component	chromosome	GO:0005694	6	0.00557723	1.12447	343	1436	2737	12885	Eaffi21345-RA,Eaff01580-RA,Egulf16993-RA,Egulf18131-RA,Eaff19521-RA,Egulf01364-RA,Eaff18703-RA,Eaff14062-RA,Egulf01655-RA,Egulf15820-RA,Eaffi19653-RA,Eaff08622-RA,Eaffi12832-RA,Eaff13293-RA,Eaff11676-RA,Egulf03251-RA,Egulf07727-RA,Eaff12655-RA,Egulf14468-RA,Eaffi12946-RA,Eaff11688-RA,Egulf15807-RA,Eaffi15418-RA,Eaff03916-RA,Eaff19058-RA,Egulf22131-RA,Egulf05137-RA,Egulf20429-RA,Eaff02890-RA,Eaff1…
Cellular component	sperm flagellum	GO:0036126	8	0.00613723	1.49791	35	110	2737	12885	Eaff11931-RA,Eaffi21676-RA,Eaff19173-RA,Eaff05626-RA,Eaff17002-RA,Egulf12386-RA,Eaff07643-RA,Egulf13034-RA,Eaff00148-RA,Egulf03789-RA,Eaffi16611-RA,Egulf04992-RA,Egulf20133-RA,Eaff08256-RA,Egulf16551-RA,Egulf12491-RA,Eaff12924-RA,Eaff13251-RA,Eaffi16715-RA,Eaffi16653-RA,Eaffi00120-RA,Egulf10359-RA,Eaffi21675-RA,Egulf10386-RA,Eaff04063-RA,Egulf03416-RA,Egulf22101-RA,Eaff14711-RA,Eaff17198-RA,Egulf…
Cellular component	ribose phosphate diphosphokinase complex	GO:0002189	6	0.00614525	3.36265	5	7	2737	12885	Eaff07714-RA,Egulf19787-RA,Eaffi04384-RA,Egulf05176-RA,Eaff11752-RA,
Cellular component	laminin complex	GO:0043256	3	0.00614525	3.36265	5	7	2737	12885	Eaff13427-RA,Eaffi11348-RA,Egulf02925-RA,Eaff17586-RA,Eaff13425-RA,
Cellular component	junctional sarcoplasmic reticulum membrane	GO:0014701	7	0.00614525	3.36265	5	7	2737	12885	Eaff20005-RA,Egulf05093-RA,Eaff11833-RA,Eaffi04288-RA,Eaffi04286-RA,
Cellular component	phenylalanine-tRNA ligase complex	GO:0009328	4	0.00614525	3.36265	5	7	2737	12885	Egulf14522-RA,Egulf12625-RA,Eaff15751-RA,Eaff17083-RA,Eaffi16864-RA,
Cellular component	phosphatidylinositol 3-kinase complex, class I	GO:0097651	7	0.00614525	3.36265	5	7	2737	12885	Egulf05895-RA,Egulf07821-RA,Eaff11164-RA,Eaffi01808-RA,Eaff01630-RA,
Cellular component	junctional membrane complex	GO:0030314	3	0.00614525	3.36265	5	7	2737	12885	Eaff20005-RA,Egulf05093-RA,Eaff11833-RA,Eaffi04288-RA,Eaffi04286-RA,
Cellular component	activin responsive factor complex	GO:0032444	5	0.00614525	3.36265	5	7	2737	12885	Eaff01580-RA,Eaffi17950-RA,Eaff01581-RA,Egulf07766-RA,Eaffi01745-RA,
Cellular component	type II terminal bouton	GO:0061175	5	0.00614525	3.36265	5	7	2737	12885	Eaffi09126-RA,Eaff08079-RA,Eaff08081-RA,Egulf00376-RA,Egulf00373-RA,
Cellular component	phosphatidylinositol 3-kinase complex, class IA	GO:0005943	8	0.00614525	3.36265	5	7	2737	12885	Egulf05895-RA,Egulf07821-RA,Eaff11164-RA,Eaffi01808-RA,Eaff01630-RA,
Cellular component	MMXD complex	GO:0071817	3	0.00622882	2.51078	8	15	2737	12885	Eaff14062-RA,Egulf02290-RA,Egulf02289-RA,Eaffi12190-RA,Egulf02287-RA,Eaff14063-RA,Eaff14061-RA,Egulf02288-RA,
Cellular component	perinuclear region of cytoplasm	GO:0048471	3	0.00638515	1.15261	237	968	2737	12885	Eaffi21345-RA,Eaff06489-RA,Eaff00291-RA,Eaffi18953-RA,Eaff00623-RA,Egulf03251-RA,Eaff11203-RA,Eaff10441-RA,Eaff16264-RA,Egulf18552-RA,Eaff11035-RA,Egulf13954-RA,Egulf22344-RA,Eaff12475-RA,Eaffi01410-RA,Egulf19416-RA,Eaffi22405-RA,Eaffi08671-RA,Eaff19614-RA,Eaffi13587-RA,Eaff16589-RA,Eaff13289-RA,Egulf22044-RA,Eaff17411-RA,Egulf05924-RA,Eaff05681-RA,Egulf13623-RA,Egulf03182-RA,Eaffi23010-RA,Eaff20…
Cellular component	Cul5-RING ubiquitin ligase complex	GO:0031466	7	0.00644676	2.35385	9	18	2737	12885	Eaff11203-RA,Eaff00669-RA,Eaffi05250-RA,Egulf04634-RA,Eaff12224-RA,Egulf05863-RA,Eaffi00678-RA,Egulf06739-RA,Eaffi03736-RA,
Cellular component	axon	GO:0030424	6	0.00650571	1.14393	260	1070	2737	12885	Eaffi21345-RA,Eaff06489-RA,Egulf21337-RA,Eaff01338-RA,Eaffi09126-RA,Egulf13360-RA,Eaffi23551-RA,Egulf09425-RA,Eaffi18953-RA,Eaffi06041-RA,Eaff17998-RA,Eaff18894-RA,Eaff06515-RA,Egulf18372-RA,Eaffi12423-RA,Eaff03916-RA,Egulf21938-RA,Egulf07470-RA,Eaff16264-RA,Eaff10212-RA,Eaff13502-RA,Egulf07916-RA,Eaff16598-RA,Eaff16787-RA,Eaffi04076-RA,Eaffi16810-RA,Eaff02324-RA,Eaffi01840-RA,Egulf19416-RA,Egulf…
Cellular component	actomyosin	GO:0042641	3	0.00754867	1.5202	31	96	2737	12885	Eaff17998-RA,Egulf21488-RA,Eaffi23452-RA,Eaff19058-RA,Egulf11514-RA,Egulf12386-RA,Egulf16403-RA,Eaff00148-RA,Egulf21483-RA,Egulf16402-RA,Egulf07430-RA,Eaffi22081-RA,Eaffi01408-RA,Egulf16936-RA,Egulf08729-RA,Egulf17423-RA,Eaff20235-RA,Eaff01253-RA,Eaffi00120-RA,Eaff19456-RA,Egulf11257-RA,Egulf10386-RA,Eaff19057-RA,Eaff04063-RA,Eaff06185-RA,Eaffi10227-RA,Eaff04879-RA,Eaff06188-RA,Eaff15426-RA,Egulf…
Cellular component	cytosolic large ribosomal subunit	GO:0022625	6	0.00798541	1.4156	43	143	2737	12885	Eaffi19578-RA,Eaffi17664-RA,Eaff09157-RA,Egulf06941-RA,Eaff00839-RA,Egulf10712-RA,Eaffi19197-RA,Eaff10570-RA,Egulf17103-RA,Eaff19842-RA,Eaff06664-RA,Eaff15406-RA,Eaff16491-RA,Eaff02977-RA,Egulf13558-RA,Eaffi10473-RA,Eaff17891-RA,Eaffi20880-RA,Eaffi12927-RA,Egulf13477-RA,Egulf20956-RA,Egulf08640-RA,Egulf17267-RA,Eaff06584-RA,Eaffi19276-RA,Eaffi10519-RA,Eaff04407-RA,Eaffi14193-RA,Eaff19955-RA,Eaff1…
Cellular component	methyltransferase complex	GO:0034708	5	0.00798541	1.4156	43	143	2737	12885	Eaff11676-RA,Egulf15807-RA,Egulf05279-RA,Eaff17367-RA,Egulf01469-RA,Eaffi18129-RA,Egulf01470-RA,Eaff02506-RA,Eaffi04491-RA,Eaff15853-RA,Eaff15987-RA,Egulf09394-RA,Eaff05248-RA,Egulf21007-RA,Eaff15344-RA,Eaff08341-RA,Eaff16174-RA,Egulf17307-RA,Eaff09093-RA,Eaffi07912-RA,Eaffi00359-RA,Eaffi18131-RA,Eaffi23329-RA,Egulf17308-RA,Eaffi04490-RA,Egulf05542-RA,Egulf13913-RA,Eaffi04825-RA,Eaffi10856-RA,Egu…
Cellular component	HULC complex	GO:0033503	6	0.00866407	2.82463	6	10	2737	12885	Eaff12655-RA,Egulf04205-RA,Eaff12576-RA,Eaffi03195-RA,Eaffi03319-RA,Egulf04106-RA,
Cellular component	alphav-beta3 integrin-PKCalpha complex	GO:0035866	5	0.00866407	2.82463	6	10	2737	12885	Eaff11639-RA,Egulf04030-RA,Egulf05346-RA,Eaffi03115-RA,Eaffi04579-RA,Eaff12726-RA,
Cellular component	apical junction complex	GO:0043296	6	0.00876102	1.30663	68	245	2737	12885	Egulf20802-RA,Eaffi00389-RA,Eaffi13736-RA,Egulf21938-RA,Eaff09599-RA,Egulf18406-RA,Eaffi21837-RA,Eaffi19291-RA,Eaffi05864-RA,Eaff19987-RA,Eaffi19287-RA,Egulf07745-RA,Egulf08360-RA,Eaffi18218-RA,Eaffi07240-RA,Eaffi20926-RA,Eaffi18038-RA,Egulf18400-RA,Eaff09762-RA,Egulf08691-RA,Eaff00400-RA,Egulf11522-RA,Egulf09324-RA,Eaffi05196-RA,Egulf04479-RA,Eaff12348-RA,Eaffi01858-RA,Egulf04548-RA,Eaffi03193-R…
Cellular component	dendrite cytoplasm	GO:0032839	7	0.00904593	1.88308	14	35	2737	12885	Egulf05014-RA,Eaff03120-RA,Egulf09416-RA,Eaffi18659-RA,Egulf05049-RA,Egulf01294-RA,Eaff11907-RA,Egulf01081-RA,Eaffi04227-RA,Eaffi03621-RA,Eaff03400-RA,Eaffi04190-RA,Egulf08016-RA,Eaff08743-RA,
Cellular component	prespliceosome	GO:0071010	5	0.00925735	1.72936	18	49	2737	12885	Egulf07306-RA,Egulf07253-RA,Eaffi12239-RA,Eaffi01285-RA,Egulf04607-RA,Eaff05248-RA,Egulf21007-RA,Eaff08775-RA,Eaffi12409-RA,Eaff14026-RA,Eaffi03706-RA,Egulf04280-RA,Eaff01160-RA,Eaff12509-RA,Eaff13895-RA,Egulf01126-RA,Egulf11677-RA,Egulf02329-RA,
Cellular component	transcription factor TFIIH holo complex	GO:0005675	9	0.00948418	2.13987	10	22	2737	12885	Eaff14062-RA,Egulf02290-RA,Egulf02289-RA,Eaffi12190-RA,Egulf02287-RA,Eaff15389-RA,Egulf17381-RA,Eaff14063-RA,Eaff14061-RA,Egulf02288-RA,
Cellular component	presynaptic cytoskeleton	GO:0099569	7	0.00984309	2.53492	7	13	2737	12885	Eaff01401-RA,Egulf15166-RA,Eaff18616-RA,Eaff01656-RA,Eaffi20262-RA,Eaffi22522-RA,Egulf07576-RA,
Cellular component	signal recognition particle	GO:0048500	4	0.00984309	2.53492	7	13	2737	12885	Eaff11447-RA,Egulf21587-RA,Eaff06101-RA,Egulf05581-RA,Eaff11446-RA,Eaffi04862-RA,Eaffi22335-RA,
Cellular component	cytoskeleton of presynaptic active zone	GO:0048788	8	0.00984309	2.53492	7	13	2737	12885	Eaff01401-RA,Egulf15166-RA,Eaff18616-RA,Eaff01656-RA,Eaffi20262-RA,Eaffi22522-RA,Egulf07576-RA,
Cellular component	signal recognition particle, endoplasmic reticulum targeting	GO:0005786	5	0.00984309	2.53492	7	13	2737	12885	Eaff11447-RA,Egulf21587-RA,Eaff06101-RA,Egulf05581-RA,Eaff11446-RA,Eaffi04862-RA,Eaffi22335-RA,
Cellular component	cluster of actin-based cell projections	GO:0098862	3	0.00990853	1.27366	79	292	2737	12885	Eaffi21345-RA,Eaff17478-RA,Eaffi18953-RA,Eaff17998-RA,Eaff09690-RA,Eaff16419-RA,Egulf21488-RA,Egulf11514-RA,Eaffi19542-RA,Eaffi08671-RA,Eaffi13587-RA,Eaff15663-RA,Eaff13187-RA,Egulf05895-RA,Egulf14314-RA,Eaff18086-RA,Eaffi01325-RA,Egulf21483-RA,Egulf22158-RA,Eaffi14741-RA,Eaffi08670-RA,Eaff00927-RA,Eaffi01177-RA,Egulf05016-RA,Egulf11522-RA,Eaffi18772-RA,Eaff01192-RA,Egulf11950-RA,Egulf07041-RA,Ea…
Cellular component	spindle envelope	GO:0070732	5	0.00996928	2.22997	9	19	2737	12885	Eaffi09412-RA,Egulf14385-RA,Egulf00337-RA,Eaffi18282-RA,Eaff08044-RA,Eaff15894-RA,Eaffi18404-RA,Eaffi09173-RA,Eaffi09411-RA,
Cellular component	trans-Golgi network	GO:0005802	5	0.0100638	1.275	78	288	2737	12885	Eaffi21345-RA,Eaffi21906-RA,Eaffi18953-RA,Eaff08581-RA,Egulf21488-RA,Eaff09911-RA,Egulf11514-RA,Eaffi08671-RA,Eaff13712-RA,Eaffi13587-RA,Egulf22044-RA,Eaff05681-RA,Eaffi19660-RA,Eaff15663-RA,Egulf16553-RA,Egulf14314-RA,Egulf11046-RA,Eaff09367-RA,Egulf21483-RA,Eaffi08670-RA,Egulf08166-RA,Eaff05866-RA,Egulf16620-RA,Eaffi01915-RA,Eaff12436-RA,Egulf06636-RA,Egulf11522-RA,Eaff07764-RA,Egulf20217-RA,Ea…
Cellular component	obsolete intrinsic component of postsynaptic specialization membrane	GO:0098948	0	0.0101629	2.35385	8	16	2737	12885	Egulf04927-RA,Eaff11986-RA,Eaffi04079-RA,Egulf04928-RA,Eaff11984-RA,Egulf01081-RA,Eaff08743-RA,Eaff11985-RA,
Cellular component	obsolete integral component of postsynaptic density membrane	GO:0099061	0	0.0101629	2.35385	8	16	2737	12885	Egulf04927-RA,Eaff11986-RA,Eaffi04079-RA,Egulf04928-RA,Eaff11984-RA,Egulf01081-RA,Eaff08743-RA,Eaff11985-RA,
Cellular component	obsolete integral component of postsynaptic specialization membrane	GO:0099060	0	0.0101629	2.35385	8	16	2737	12885	Egulf04927-RA,Eaff11986-RA,Eaffi04079-RA,Egulf04928-RA,Eaff11984-RA,Egulf01081-RA,Eaff08743-RA,Eaff11985-RA,
Cellular component	obsolete intrinsic component of postsynaptic density membrane	GO:0099146	0	0.0101629	2.35385	8	16	2737	12885	Egulf04927-RA,Eaff11986-RA,Eaffi04079-RA,Egulf04928-RA,Eaff11984-RA,Egulf01081-RA,Eaff08743-RA,Eaff11985-RA,
Cellular component	cellular anatomical entity	GO:0110165	2	0.0106676	1.00148	2737	12866	2737	12885	Egulf04437-RA,Eaffi21345-RA,Eaff12249-RA,Eaffi21906-RA,Eaff06489-RA,Egulf20802-RA,Eaffi14133-RA,Egulf01045-RA,Eaff12123-RA,Eaff15515-RA,Eaff09079-RA,Eaff09080-RA,Egulf21337-RA,Eaff05827-RA,Eaffi04572-RA,Egulf12619-RA,Eaff18587-RA,Eaffi05771-RA,Eaff01580-RA,Eaff07460-RA,Eaff01338-RA,Eaff11702-RA,Eaffi05403-RA,Egulf01708-RA,Egulf06872-RA,Egulf03455-RA,Eaffi07939-RA,Egulf06159-RA,Eaffi16694-RA,Eaffi…		0.035377
Cellular component	pole plasm	GO:0045495	4	0.0116387	1.40529	40	134	2737	12885	Eaff12249-RA,Eaff11203-RA,Eaff12209-RA,Eaff16264-RA,Egulf07228-RA,Egulf18605-RA,Egulf04651-RA,Egulf06144-RA,Eaff07846-RA,Eaff13393-RA,Eaff09789-RA,Eaff00669-RA,Eaff05248-RA,Egulf21007-RA,Eaffi05250-RA,Eaff12096-RA,Eaffi02108-RA,Egulf13797-RA,Eaffi09489-RA,Egulf04469-RA,Egulf04634-RA,Egulf03243-RA,Eaff12224-RA,Eaff12062-RA,Egulf05863-RA,Eaff12208-RA,Eaffi05893-RA,Eaffi00678-RA,Eaffi18746-RA,Eaff01…
Cellular component	non-motile cilium	GO:0097730	6	0.0120952	1.32187	57	203	2737	12885	Eaff04284-RA,Egulf02334-RA,Eaff03916-RA,Egulf02306-RA,Eaffi16810-RA,Eaffi01410-RA,Egulf19416-RA,Egulf16606-RA,Eaff13808-RA,Egulf05895-RA,Eaff12371-RA,Eaff12943-RA,Eaff00148-RA,Egulf09620-RA,Eaff15959-RA,Eaffi04963-RA,Eaff14016-RA,Egulf07821-RA,Eaff11178-RA,Eaff02272-RA,Eaff10921-RA,Eaff18470-RA,Egulf03766-RA,Egulf19665-RA,Eaff12372-RA,Egulf14178-RA,Eaff14045-RA,Eaffi00120-RA,Egulf08159-RA,Eaff111…
Cellular component	cell-cell contact zone	GO:0044291	6	0.0131438	1.40861	38	127	2737	12885	Eaff17998-RA,Egulf21938-RA,Egulf18406-RA,Eaffi21837-RA,Eaffi05864-RA,Eaff19987-RA,Egulf07745-RA,Eaffi07240-RA,Eaffi18038-RA,Egulf18400-RA,Eaff09762-RA,Egulf04479-RA,Eaff09487-RA,Eaff12348-RA,Egulf04548-RA,Eaffi02733-RA,Eaffi03647-RA,Eaff05782-RA,Eaff12957-RA,Eaff18149-RA,Egulf15991-RA,Eaff16080-RA,Eaff01559-RA,Egulf18367-RA,Eaff09732-RA,Egulf15768-RA,Egulf01323-RA,Egulf09502-RA,Eaff09765-RA,Eaffi…
Cellular component	caspase complex	GO:0008303	6	0.0135266	2.94232	5	8	2737	12885	Egulf11154-RA,Eaff04782-RA,Eaff14469-RA,Egulf11155-RA,Egulf13501-RA,
Cellular component	Shc-EGFR complex	GO:0070435	5	0.0135266	2.94232	5	8	2737	12885	Eaff06642-RA,Eaffi14283-RA,Egulf20978-RA,Eaff06644-RA,Eaff06643-RA,
Cellular component	sperm annulus	GO:0097227	3	0.0135266	2.94232	5	8	2737	12885	Egulf12386-RA,Eaff00148-RA,Eaffi00120-RA,Egulf10386-RA,Eaff04063-RA,
Cellular component	type III terminal bouton	GO:0097467	5	0.0135266	2.94232	5	8	2737	12885	Eaffi09126-RA,Eaff08079-RA,Eaff08081-RA,Egulf00376-RA,Egulf00373-RA,
Cellular component	GPI-anchor transamidase complex	GO:0042765	7	0.0135266	2.94232	5	8	2737	12885	Egulf11154-RA,Eaff04782-RA,Eaff14469-RA,Egulf11155-RA,Egulf13501-RA,
Cellular component	obsolete intrinsic component of organelle membrane	GO:0031300	0	0.0135361	1.2931	64	233	2737	12885	Eaffi21906-RA,Eaffi15139-RA,Egulf07470-RA,Eaff13502-RA,Eaff16787-RA,Eaff16832-RA,Eaff01648-RA,Egulf09059-RA,Eaffi01328-RA,Eaff20005-RA,Egulf04927-RA,Eaffi02212-RA,Egulf07538-RA,Eaff19703-RA,Egulf10849-RA,Eaff03814-RA,Egulf19094-RA,Eaff02834-RA,Eaff05866-RA,Egulf02856-RA,Egulf05093-RA,Eaff11986-RA,Eaffi04079-RA,Eaff02837-RA,Egulf11685-RA,Eaffi01523-RA,Egulf20217-RA,Eaff01292-RA,Eaff09004-RA,Egulf0…
Cellular component	ATP-binding cassette (ABC) transporter complex	GO:0043190	6	0.0147635	2.11847	9	20	2737	12885	Eaffi00389-RA,Eaffi19291-RA,Eaffi19287-RA,Eaffi18218-RA,Eaff00400-RA,Egulf09324-RA,Egulf21992-RA,Eaff03044-RA,Eaff05733-RA,
Biological process	monoatomic cation transmembrane transport	GO:0098655	7	0	1.64861	377	1067	2817	13144	Eaffi21345-RA,Eaff06489-RA,Eaff15515-RA,Eaffi04572-RA,Eaff17478-RA,Eaffi08922-RA,Egulf13360-RA,Eaffi06167-RA,Egulf09425-RA,Eaff09398-RA,Eaff17998-RA,Eaff13715-RA,Eaff04677-RA,Egulf02334-RA,Egulf18921-RA,Eaff03123-RA,Eaff16308-RA,Eaff11639-RA,Egulf21938-RA,Egulf07470-RA,Eaffi20233-RA,Eaff12097-RA,Egulf06466-RA,Eaff02648-RA,Eaff16598-RA,Eaff15089-RA,Eaffi16810-RA,Eaffi14067-RA,Eaffi10278-RA,Egulf00…
Biological process	inorganic ion transmembrane transport	GO:0098660	6	0	1.67895	421	1170	2817	13144	Eaffi21345-RA,Eaff06489-RA,Eaffi04572-RA,Eaff07460-RA,Eaff17478-RA,Eaffi09126-RA,Eaffi08922-RA,Egulf13360-RA,Eaffi06167-RA,Eaff10158-RA,Egulf09425-RA,Eaffi15139-RA,Eaff09398-RA,Eaff17998-RA,Eaff13715-RA,Eaff04677-RA,Egulf02334-RA,Egulf18921-RA,Eaff16419-RA,Eaff03123-RA,Eaff16308-RA,Eaff11639-RA,Egulf21938-RA,Egulf07470-RA,Eaffi20233-RA,Eaff12097-RA,Eaff13502-RA,Egulf10934-RA,Egulf06466-RA,Eaff026…
Biological process	inorganic cation transmembrane transport	GO:0098662	7	0	1.65116	379	1071	2817	13144	Eaffi21345-RA,Eaff06489-RA,Eaffi04572-RA,Eaff07460-RA,Eaff17478-RA,Eaffi09126-RA,Eaffi08922-RA,Egulf13360-RA,Eaffi06167-RA,Egulf09425-RA,Eaffi15139-RA,Eaff09398-RA,Eaff17998-RA,Eaff13715-RA,Eaff04677-RA,Egulf02334-RA,Egulf18921-RA,Eaff16419-RA,Eaff03123-RA,Eaff16308-RA,Eaff11639-RA,Egulf21938-RA,Eaffi20233-RA,Eaff12097-RA,Egulf06466-RA,Eaff02648-RA,Eaff16598-RA,Eaff15089-RA,Eaffi16810-RA,Eaffi140…
Biological process	response to oxygen-containing compound	GO:1901700	4	0	1.32717	636	2236	2817	13144	Egulf04437-RA,Eaffi21345-RA,Eaff06489-RA,Egulf20802-RA,Egulf01045-RA,Eaff01580-RA,Eaff07460-RA,Eaffi05403-RA,Egulf16993-RA,Egulf13360-RA,Eaffi23551-RA,Eaff00291-RA,Eaff10158-RA,Egulf09425-RA,Eaff07804-RA,Egulf21783-RA,Eaff19521-RA,Eaff18703-RA,Eaff14226-RA,Egulf13179-RA,Eaff17998-RA,Eaff18894-RA,Eaffi16723-RA,Eaffi18568-RA,Egulf02334-RA,Eaff16419-RA,Eaff11676-RA,Egulf18372-RA,Eaff12655-RA,Egulf09…
Biological process	monoatomic ion transmembrane transport	GO:0034220	6	0	1.62294	464	1334	2817	13144	Eaffi21345-RA,Eaff06489-RA,Eaff15515-RA,Eaffi04572-RA,Eaff07460-RA,Eaff17478-RA,Eaffi08922-RA,Egulf13360-RA,Eaffi06167-RA,Eaff10158-RA,Egulf09425-RA,Eaffi15139-RA,Eaff09398-RA,Eaff17998-RA,Eaff13715-RA,Eaff04677-RA,Eaff09690-RA,Egulf02334-RA,Egulf18921-RA,Eaff16419-RA,Eaff03123-RA,Eaff16308-RA,Eaff11639-RA,Egulf21938-RA,Egulf07470-RA,Eaffi20233-RA,Eaff12097-RA,Eaff13502-RA,Egulf10934-RA,Egulf0646…
Biological process	regulation of synapse structure or activity	GO:0050803	4	0	1.66485	228	639	2817	13144	Eaff01580-RA,Eaff01338-RA,Eaffi08922-RA,Egulf13360-RA,Eaff00291-RA,Egulf09425-RA,Eaff08581-RA,Egulf18704-RA,Eaffi09470-RA,Eaff16534-RA,Eaffi06041-RA,Egulf16154-RA,Eaff01084-RA,Egulf03251-RA,Eaff19734-RA,Eaff10016-RA,Eaff16264-RA,Eaff16598-RA,Egulf22344-RA,Eaff02324-RA,Eaff03977-RA,Eaffi01840-RA,Eaff00486-RA,Eaff11087-RA,Egulf19416-RA,Eaff12603-RA,Eaffi21636-RA,Eaffi17950-RA,Egulf18545-RA,Eaff1658…
Biological process	regulation of cytosolic calcium ion concentration	GO:0051480	8	0	1.98796	121	284	2817	13144	Eaff07460-RA,Eaffi09126-RA,Egulf13360-RA,Eaffi23551-RA,Eaff17998-RA,Eaff18894-RA,Eaffi12423-RA,Eaff11639-RA,Egulf21938-RA,Eaff16598-RA,Eaffi16810-RA,Eaffi14067-RA,Eaffi01410-RA,Eaff11087-RA,Eaff03120-RA,Egulf18406-RA,Eaff20005-RA,Eaff02518-RA,Egulf01295-RA,Eaffi05864-RA,Eaff05947-RA,Eaff07643-RA,Eaff19987-RA,Egulf07745-RA,Eaff08079-RA,Eaffi01325-RA,Eaffi07240-RA,Egulf09416-RA,Eaffi02909-RA,Eaff03…
Biological process	sodium ion transmembrane transport	GO:0035725	9	0	2.23891	119	248	2817	13144	Eaff17478-RA,Eaff09398-RA,Eaff17998-RA,Eaff04677-RA,Egulf21938-RA,Egulf06466-RA,Eaff00486-RA,Eaff10561-RA,Eaff03120-RA,Egulf02095-RA,Egulf18406-RA,Eaffi21837-RA,Egulf01295-RA,Egulf20268-RA,Eaffi05864-RA,Eaff00425-RA,Egulf16610-RA,Eaff19987-RA,Egulf10123-RA,Egulf07745-RA,Eaff10850-RA,Eaffi02118-RA,Eaffi07240-RA,Egulf09416-RA,Egulf11029-RA,Eaffi18038-RA,Egulf18400-RA,Egulf04530-RA,Eaffi06805-RA,Eaf…
Biological process	negative regulation of cation transmembrane transport	GO:1904063	9	0	2.81718	64	106	2817	13144	Eaffi08922-RA,Egulf21938-RA,Eaffi10278-RA,Egulf00279-RA,Eaffi13587-RA,Eaff08383-RA,Egulf18406-RA,Eaff16655-RA,Eaffi05864-RA,Eaff19987-RA,Eaffi13559-RA,Egulf07745-RA,Eaffi07240-RA,Eaff14297-RA,Eaff12317-RA,Eaffi18038-RA,Egulf18400-RA,Eaff09762-RA,Eaff15959-RA,Egulf11522-RA,Eaff07991-RA,Eaff20185-RA,Egulf17769-RA,Egulf04479-RA,Eaff12348-RA,Eaffi01858-RA,Egulf04910-RA,Eaffi10277-RA,Egulf00548-RA,Eaf…
Biological process	calcium ion homeostasis	GO:0055074	6	0	1.86449	197	493	2817	13144	Egulf01045-RA,Eaff07460-RA,Eaffi09126-RA,Egulf13360-RA,Eaffi23551-RA,Eaff17998-RA,Eaff18894-RA,Eaffi12423-RA,Eaff10384-RA,Eaff17680-RA,Eaff11639-RA,Egulf21938-RA,Eaff16598-RA,Eaffi16810-RA,Eaffi14067-RA,Eaffi01410-RA,Eaff11087-RA,Eaff10561-RA,Eaff03120-RA,Eaff08717-RA,Egulf18406-RA,Eaff20005-RA,Eaff02518-RA,Eaff16655-RA,Egulf01295-RA,Eaffi05864-RA,Eaff05947-RA,Eaff07643-RA,Egulf01052-RA,Egulf0589…
Biological process	potassium ion homeostasis	GO:0055075	6	0	3.655	47	60	2817	13144	Egulf01045-RA,Egulf21938-RA,Eaff08717-RA,Egulf18406-RA,Eaffi21837-RA,Eaffi05864-RA,Egulf01052-RA,Eaff19987-RA,Egulf07745-RA,Eaffi07240-RA,Eaffi18038-RA,Egulf18400-RA,Eaff09762-RA,Egulf01049-RA,Egulf04479-RA,Eaff09487-RA,Eaff12348-RA,Eaff08711-RA,Egulf04910-RA,Eaff05782-RA,Eaff08716-RA,Eaff18149-RA,Egulf01041-RA,Eaff16080-RA,Eaff01559-RA,Egulf18367-RA,Eaff09732-RA,Eaff08713-RA,Egulf15768-RA,Egulf0…
Biological process	sodium ion homeostasis	GO:0055078	6	0	3.49947	51	68	2817	13144	Egulf01045-RA,Egulf21938-RA,Eaff08717-RA,Egulf18406-RA,Eaffi21837-RA,Eaffi05864-RA,Eaff07643-RA,Egulf01052-RA,Eaff19987-RA,Egulf07745-RA,Eaffi07240-RA,Eaffi18038-RA,Egulf18400-RA,Eaff09762-RA,Egulf17769-RA,Egulf01049-RA,Egulf04479-RA,Eaff09487-RA,Eaff12348-RA,Eaff08711-RA,Eaff05782-RA,Eaff08716-RA,Eaff18149-RA,Egulf01041-RA,Eaff16080-RA,Eaff01559-RA,Egulf18367-RA,Eaff09732-RA,Eaff08713-RA,Egulf15…
Biological process	intracellular chemical homeostasis	GO:0055082	4	0	1.52625	315	963	2817	13144	Egulf01045-RA,Eaffi04572-RA,Eaff01580-RA,Eaff07460-RA,Eaffi09126-RA,Egulf13360-RA,Eaffi23551-RA,Egulf09425-RA,Egulf21783-RA,Eaff17998-RA,Eaff18894-RA,Egulf18372-RA,Eaffi12423-RA,Eaff10384-RA,Eaff17680-RA,Eaff03916-RA,Eaff11639-RA,Egulf21938-RA,Eaff05926-RA,Eaff12097-RA,Eaff16598-RA,Eaffi16810-RA,Eaffi14067-RA,Eaff02324-RA,Eaffi01410-RA,Eaff11087-RA,Eaffi17950-RA,Eaff10561-RA,Eaffi13587-RA,Egulf03…
Biological process	transmembrane transport	GO:0055085	5	0	1.50435	551	1709	2817	13144	Eaffi21345-RA,Eaff06489-RA,Eaff15515-RA,Eaffi04572-RA,Eaff07460-RA,Eaff17478-RA,Eaffi09126-RA,Eaffi08922-RA,Egulf13360-RA,Eaffi06167-RA,Eaff10158-RA,Egulf09425-RA,Eaffi15139-RA,Eaff09398-RA,Egulf04654-RA,Eaff17998-RA,Eaff13715-RA,Eaff04677-RA,Eaff09690-RA,Eaffi00389-RA,Egulf02334-RA,Egulf18921-RA,Eaff16419-RA,Eaff03123-RA,Eaff16308-RA,Eaff11639-RA,Egulf21938-RA,Egulf07470-RA,Eaffi20233-RA,Eaff120…
Biological process	organic substance transport	GO:0071702	5	0	1.24768	849	3175	2817	13144	Egulf04437-RA,Eaffi21906-RA,Egulf20802-RA,Egulf01045-RA,Eaff15515-RA,Eaff07460-RA,Eaff11702-RA,Eaffi05403-RA,Eaff11931-RA,Eaff17478-RA,Eaffi09126-RA,Eaffi08922-RA,Egulf16993-RA,Egulf13360-RA,Eaffi06167-RA,Egulf09425-RA,Eaffi15139-RA,Eaffi18953-RA,Egulf21783-RA,Eaff19521-RA,Egulf01364-RA,Eaffi09470-RA,Eaff18703-RA,Eaffi06041-RA,Eaff17998-RA,Eaff13715-RA,Egulf07575-RA,Eaff04677-RA,Eaff09690-RA,Eaff…
Biological process	monoatomic ion transport	GO:0006811	5	0	1.49476	543	1695	2817	13144	Eaffi21345-RA,Eaff06489-RA,Eaff15515-RA,Eaffi04572-RA,Eaff07460-RA,Eaff17478-RA,Eaffi09126-RA,Eaffi08922-RA,Egulf13360-RA,Eaffi06167-RA,Eaff10158-RA,Egulf09425-RA,Eaffi15139-RA,Eaffi18953-RA,Eaff09398-RA,Eaff17998-RA,Eaff13715-RA,Eaff04677-RA,Eaff09690-RA,Egulf02334-RA,Egulf18921-RA,Eaff16419-RA,Eaff03123-RA,Egulf21235-RA,Eaff16308-RA,Eaff11639-RA,Egulf21938-RA,Egulf07470-RA,Eaffi20233-RA,Eaff120…
Biological process	potassium ion transport	GO:0006813	8	0	2.29205	140	285	2817	13144	Eaffi21345-RA,Eaff06489-RA,Eaffi08922-RA,Egulf09425-RA,Eaff17998-RA,Eaff16308-RA,Egulf21938-RA,Eaff15089-RA,Eaffi16810-RA,Eaffi10278-RA,Eaff02324-RA,Eaff00486-RA,Eaff10561-RA,Eaff03120-RA,Egulf13623-RA,Egulf18406-RA,Eaffi21837-RA,Egulf01295-RA,Eaff13349-RA,Eaffi05864-RA,Eaff19987-RA,Egulf07745-RA,Eaffi07240-RA,Egulf09416-RA,Eaff19403-RA,Eaff12317-RA,Egulf18099-RA,Egulf19307-RA,Eaffi18104-RA,Eaffi…
Biological process	sodium ion transport	GO:0006814	8	0	2.14202	129	281	2817	13144	Eaff17478-RA,Eaff09398-RA,Eaff17998-RA,Eaff04677-RA,Egulf21938-RA,Egulf06466-RA,Eaff03683-RA,Eaff00486-RA,Eaff10561-RA,Eaff03120-RA,Egulf02095-RA,Egulf18406-RA,Eaffi21837-RA,Egulf01295-RA,Egulf20268-RA,Eaffi05864-RA,Eaff00425-RA,Egulf16610-RA,Eaff19987-RA,Egulf10123-RA,Egulf07745-RA,Egulf02286-RA,Eaff10850-RA,Eaffi02118-RA,Eaffi07240-RA,Egulf09416-RA,Eaff03814-RA,Egulf11029-RA,Eaffi18038-RA,Egulf…
Biological process	obsolete intracellular metal ion homeostasis	GO:0006875	0	0	1.73913	205	550	2817	13144	Eaff01580-RA,Eaff07460-RA,Eaffi09126-RA,Egulf13360-RA,Eaffi23551-RA,Eaff17998-RA,Eaff18894-RA,Eaffi12423-RA,Eaff10384-RA,Eaff17680-RA,Eaff11639-RA,Egulf21938-RA,Eaff16598-RA,Eaffi16810-RA,Eaffi14067-RA,Eaffi01410-RA,Eaff11087-RA,Eaffi17950-RA,Eaff10561-RA,Eaffi13587-RA,Eaff03120-RA,Egulf18406-RA,Eaff20005-RA,Egulf17127-RA,Eaffi21837-RA,Eaff02518-RA,Eaff16655-RA,Egulf01295-RA,Eaffi05864-RA,Eaff059…
Biological process	obsolete movement of cell or subcellular component	GO:0006928	0	0	1.35106	635	2193	2817	13144	Eaffi21345-RA,Egulf20802-RA,Eaff09079-RA,Eaff09080-RA,Eaff18587-RA,Eaff01580-RA,Eaff01338-RA,Eaffi07939-RA,Eaff11931-RA,Eaff04731-RA,Egulf15541-RA,Egulf18131-RA,Eaffi18953-RA,Egulf01364-RA,Eaff10707-RA,Eaff09398-RA,Eaff16534-RA,Eaffi06041-RA,Eaff17998-RA,Egulf14305-RA,Egulf01414-RA,Eaffi00389-RA,Egulf18307-RA,Eaffi19653-RA,Egulf16154-RA,Eaff01084-RA,Eaffi12832-RA,Eaff13293-RA,Eaff11676-RA,Eaffi17…
Biological process	imaginal disc-derived appendage morphogenesis	GO:0035114	5	0	1.64361	242	687	2817	13144	Egulf20802-RA,Egulf01045-RA,Eaff01580-RA,Egulf13179-RA,Eaff17998-RA,Egulf01414-RA,Egulf18307-RA,Egulf16154-RA,Eaff01084-RA,Eaff06515-RA,Eaff19966-RA,Egulf09781-RA,Eaffi13736-RA,Egulf15807-RA,Eaffi23452-RA,Eaff11639-RA,Eaff02589-RA,Eaff09039-RA,Eaff12568-RA,Eaff06378-RA,Eaffi03884-RA,Egulf21098-RA,Eaffi17950-RA,Egulf18569-RA,Eaff01879-RA,Egulf05924-RA,Eaff08717-RA,Eaffi19660-RA,Eaff14233-RA,Egulf1…
Biological process	post-embryonic appendage morphogenesis	GO:0035120	5	0	1.6283	238	682	2817	13144	Egulf20802-RA,Egulf01045-RA,Eaff01580-RA,Egulf13179-RA,Eaff17998-RA,Egulf01414-RA,Egulf18307-RA,Egulf16154-RA,Eaff01084-RA,Eaff06515-RA,Eaff19966-RA,Egulf09781-RA,Eaffi13736-RA,Egulf15807-RA,Eaffi23452-RA,Eaff11639-RA,Eaff02589-RA,Eaff09039-RA,Eaff12568-RA,Eaff06378-RA,Eaffi03884-RA,Egulf21098-RA,Eaffi17950-RA,Egulf18569-RA,Eaff01879-RA,Egulf05924-RA,Eaff08717-RA,Eaffi19660-RA,Eaff14233-RA,Egulf1…
Biological process	ionotropic glutamate receptor signaling pathway	GO:0035235	8	0	3.17544	49	72	2817	13144	Egulf13360-RA,Egulf21938-RA,Eaff16598-RA,Eaff00486-RA,Eaff03120-RA,Egulf18406-RA,Egulf01295-RA,Eaffi05864-RA,Eaff19987-RA,Egulf07745-RA,Eaffi07240-RA,Egulf09416-RA,Eaffi18038-RA,Egulf18400-RA,Egulf04530-RA,Eaff09762-RA,Eaffi15959-RA,Egulf17008-RA,Egulf04479-RA,Eaff12348-RA,Egulf20006-RA,Eaff05782-RA,Egulf20437-RA,Egulf10471-RA,Egulf01294-RA,Eaff01559-RA,Egulf01081-RA,Eaff16050-RA,Eaff04144-RA,Eaf…
Biological process	localization of cell	GO:0051674	3	0	1.53086	459	1399	2817	13144	Eaffi21345-RA,Egulf20802-RA,Eaff18587-RA,Eaff01338-RA,Eaff11931-RA,Egulf15541-RA,Egulf18131-RA,Eaffi18953-RA,Eaff16534-RA,Eaffi06041-RA,Eaff17998-RA,Egulf14305-RA,Eaffi00389-RA,Egulf18307-RA,Eaffi19653-RA,Egulf16154-RA,Eaff01084-RA,Eaffi12832-RA,Eaff13293-RA,Eaffi17676-RA,Egulf21488-RA,Egulf07727-RA,Eaff12655-RA,Eaff11203-RA,Egulf09781-RA,Eaff09911-RA,Eaffi21676-RA,Eaffi12946-RA,Eaff04817-RA,Eaff…
Biological process	membrane depolarization	GO:0051899	5	0	2.96351	94	148	2817	13144	Eaffi23551-RA,Eaffi06167-RA,Eaff09398-RA,Egulf04654-RA,Eaffi12423-RA,Egulf21938-RA,Eaffi20233-RA,Eaffi16810-RA,Eaff11087-RA,Egulf00537-RA,Eaffi03766-RA,Eaff03120-RA,Eaff12204-RA,Egulf18406-RA,Egulf17966-RA,Eaffi05864-RA,Eaff19987-RA,Egulf05598-RA,Egulf07745-RA,Eaffi14977-RA,Eaff12671-RA,Eaffi07240-RA,Egulf09416-RA,Eaff03814-RA,Eaff12203-RA,Eaff15766-RA,Eaffi18038-RA,Egulf18400-RA,Egulf19785-RA,Ea…
Biological process	regulation of actin filament-based process	GO:0032970	5	0	1.71402	198	539	2817	13144	Eaffi21345-RA,Egulf20802-RA,Eaff01580-RA,Egulf18131-RA,Eaffi18953-RA,Eaff16534-RA,Eaff17998-RA,Eaffi19653-RA,Eaff01084-RA,Eaffi12832-RA,Eaff13293-RA,Egulf07727-RA,Eaffi12946-RA,Eaffi13736-RA,Eaff17680-RA,Eaffi23452-RA,Eaff11639-RA,Eaff02890-RA,Egulf21938-RA,Eaffi05569-RA,Eaff09656-RA,Eaffi23121-RA,Egulf07916-RA,Eaff12475-RA,Eaff03977-RA,Eaffi01410-RA,Egulf00432-RA,Eaffi08671-RA,Eaffi17950-RA,Eaff…
Biological process	negative regulation of RNA splicing	GO:0033119	9	0	2.92263	57	91	2817	13144	Eaff18587-RA,Egulf07306-RA,Egulf18552-RA,Eaffi14436-RA,Eaffi16011-RA,Egulf22344-RA,Eaff19614-RA,Eaff13403-RA,Eaffi01285-RA,Eaffi06050-RA,Egulf15213-RA,Eaff12358-RA,Eaffi02155-RA,Egulf17545-RA,Eaffi09601-RA,Egulf13366-RA,Egulf06558-RA,Egulf04607-RA,Egulf02838-RA,Eaffi00536-RA,Eaffi15366-RA,Eaffi19879-RA,Egulf17257-RA,Eaff17428-RA,Eaff13524-RA,Egulf12171-RA,Eaff15509-RA,Egulf15211-RA,Eaffi02095-RA,…
Biological process	startle response	GO:0001964	6	0	3.24025	50	72	2817	13144	Eaff06489-RA,Egulf13360-RA,Eaff10158-RA,Egulf02334-RA,Egulf10934-RA,Eaff16598-RA,Egulf13623-RA,Egulf16606-RA,Eaff04968-RA,Egulf02145-RA,Egulf01899-RA,Eaff12371-RA,Eaff12943-RA,Eaffi13417-RA,Eaff04548-RA,Egulf09620-RA,Eaff01680-RA,Eaff14433-RA,Eaffi15959-RA,Eaffi06391-RA,Eaff14016-RA,Egulf04548-RA,Eaffi02733-RA,Eaffi03647-RA,Eaff04595-RA,Egulf03766-RA,Eaff12957-RA,Egulf15991-RA,Eaffi21202-RA,Eaff1…
Biological process	cilium or flagellum-dependent cell motility	GO:0001539	4	0	2.52473	79	146	2817	13144	Eaff18587-RA,Eaff11931-RA,Eaffi18953-RA,Eaff12655-RA,Eaffi21676-RA,Eaff05626-RA,Eaffi08671-RA,Eaff14476-RA,Egulf20070-RA,Egulf05924-RA,Egulf04205-RA,Eaff15663-RA,Eaff17002-RA,Eaffi05715-RA,Eaff07643-RA,Egulf15213-RA,Eaff09485-RA,Egulf14314-RA,Egulf13034-RA,Eaffi09601-RA,Egulf03789-RA,Egulf18192-RA,Eaff07081-RA,Eaffi08670-RA,Egulf19242-RA,Egulf04992-RA,Eaff10566-RA,Egulf20133-RA,Egulf05152-RA,Eaff…
Biological process	cardiac muscle cell membrane repolarization	GO:0099622	6	0	3.73277	36	45	2817	13144	Eaffi21345-RA,Egulf21938-RA,Egulf18406-RA,Eaffi21837-RA,Eaffi05864-RA,Eaff19987-RA,Egulf07745-RA,Eaffi07240-RA,Eaffi18038-RA,Egulf18400-RA,Eaff09762-RA,Eaff20185-RA,Egulf04479-RA,Eaff09487-RA,Eaff12348-RA,Egulf04910-RA,Eaff05782-RA,Eaff18149-RA,Eaff16080-RA,Eaff01559-RA,Egulf18367-RA,Eaff09732-RA,Eaff13756-RA,Egulf11257-RA,Egulf15768-RA,Egulf01323-RA,Egulf09502-RA,Eaff09765-RA,Eaff04879-RA,Egulf1…
Biological process	anterograde trans-synaptic signaling	GO:0098916	7	0	1.50733	356	1102	2817	13144	Eaffi04572-RA,Eaff18587-RA,Eaff01338-RA,Eaffi09126-RA,Egulf13360-RA,Eaff10158-RA,Egulf09425-RA,Eaffi18953-RA,Egulf18704-RA,Eaff16534-RA,Eaff18894-RA,Egulf16154-RA,Eaff01084-RA,Egulf03251-RA,Egulf18372-RA,Eaff10016-RA,Egulf22131-RA,Egulf21938-RA,Egulf07470-RA,Eaff02589-RA,Eaff16264-RA,Eaff12097-RA,Eaff13502-RA,Egulf10934-RA,Eaff16598-RA,Eaff16787-RA,Egulf19357-RA,Eaff12568-RA,Egulf22344-RA,Eaff023…
Biological process	regulation of trans-synaptic signaling	GO:0099177	6	0	1.74196	252	675	2817	13144	Eaff18587-RA,Eaffi09126-RA,Egulf13360-RA,Egulf09425-RA,Eaffi18953-RA,Eaff16534-RA,Eaff01084-RA,Egulf03251-RA,Egulf18372-RA,Egulf22131-RA,Egulf21938-RA,Eaff02589-RA,Eaff16264-RA,Eaff13502-RA,Eaff16598-RA,Eaff16787-RA,Eaff12568-RA,Eaff02324-RA,Eaff00486-RA,Eaff11087-RA,Egulf19416-RA,Egulf18134-RA,Eaffi08671-RA,Eaff10561-RA,Eaff16589-RA,Egulf15955-RA,Egulf22044-RA,Eaff17411-RA,Eaff03120-RA,Egulf0592…
Biological process	membrane repolarization	GO:0086009	5	0	3.75106	41	51	2817	13144	Eaffi21345-RA,Egulf21938-RA,Egulf18406-RA,Eaffi21837-RA,Eaffi05864-RA,Eaff19987-RA,Egulf07745-RA,Eaffi07240-RA,Eaffi18038-RA,Egulf18400-RA,Eaff09762-RA,Eaff20185-RA,Egulf17769-RA,Egulf04479-RA,Eaff09487-RA,Eaff12348-RA,Egulf04910-RA,Eaff05782-RA,Eaff18149-RA,Eaff16080-RA,Eaff01559-RA,Egulf18367-RA,Eaff09732-RA,Eaff13756-RA,Egulf11257-RA,Egulf15768-RA,Egulf01323-RA,Eaffi22699-RA,Egulf09502-RA,Eaff…
Biological process	striated muscle myosin thick filament assembly	GO:0071688	10	0	3.27878	52	74	2817	13144	Egulf18131-RA,Eaff17998-RA,Eaffi19653-RA,Eaffi12832-RA,Eaff13293-RA,Egulf07727-RA,Eaffi12946-RA,Eaff02890-RA,Eaffi05569-RA,Eaff09656-RA,Eaffi23121-RA,Egulf00432-RA,Eaffi02849-RA,Eaffi21583-RA,Eaffi15214-RA,Eaffi02248-RA,Eaffi24006-RA,Eaffi12661-RA,Eaff04392-RA,Egulf20022-RA,Eaff06505-RA,Egulf18288-RA,Eaffi04589-RA,Eaffi13100-RA,Eaffi13522-RA,Eaffi09054-RA,Eaffi23123-RA,Egulf11145-RA,Egulf11811-RA…
Biological process	muscle contraction	GO:0006936	5	0	2.07989	226	507	2817	13144	Eaffi21345-RA,Eaff06489-RA,Eaff07460-RA,Egulf18131-RA,Eaffi06167-RA,Eaff10158-RA,Egulf09425-RA,Eaff17998-RA,Eaff18894-RA,Eaffi19653-RA,Egulf18921-RA,Eaffi12832-RA,Eaff13293-RA,Eaff11676-RA,Egulf07727-RA,Eaffi12946-RA,Eaff17680-RA,Eaffi23452-RA,Eaff02890-RA,Egulf21938-RA,Eaffi05569-RA,Eaff02589-RA,Eaffi20233-RA,Eaff09656-RA,Eaffi23121-RA,Egulf10934-RA,Egulf05279-RA,Eaff12568-RA,Eaff02324-RA,Egulf0…
Biological process	striated muscle contraction	GO:0006941	6	0	2.19698	105	223	2817	13144	Eaffi21345-RA,Eaffi06167-RA,Eaff17998-RA,Eaff11676-RA,Eaff17680-RA,Egulf21938-RA,Eaffi05569-RA,Eaffi20233-RA,Eaff09656-RA,Egulf05279-RA,Egulf00537-RA,Eaffi02849-RA,Egulf18406-RA,Eaff20005-RA,Eaffi21837-RA,Eaff11504-RA,Eaffi05864-RA,Eaff16196-RA,Eaffi04491-RA,Eaff19987-RA,Egulf07745-RA,Eaff12671-RA,Eaffi07240-RA,Eaff03814-RA,Eaff16646-RA,Egulf13362-RA,Eaffi18038-RA,Egulf18400-RA,Eaff06505-RA,Egulf…
Biological process	obsolete divalent inorganic cation homeostasis	GO:0072507	0	0	1.90025	202	496	2817	13144	Egulf01045-RA,Eaff07460-RA,Eaffi09126-RA,Egulf13360-RA,Eaffi23551-RA,Eaff17998-RA,Eaff18894-RA,Eaffi12423-RA,Eaff10384-RA,Eaff17680-RA,Eaff11639-RA,Egulf21938-RA,Eaff16598-RA,Eaffi16810-RA,Eaffi14067-RA,Eaffi01410-RA,Eaff11087-RA,Eaff10561-RA,Eaff03120-RA,Eaff08717-RA,Egulf18406-RA,Eaff20005-RA,Eaff02518-RA,Eaff16655-RA,Egulf01295-RA,Eaffi05864-RA,Eaff05947-RA,Eaff07643-RA,Egulf01052-RA,Egulf0589…
Biological process	locomotion	GO:0040011	2	0	1.37554	834	2829	2817	13144	Eaffi21345-RA,Eaffi21906-RA,Egulf20802-RA,Egulf01045-RA,Eaff09079-RA,Eaff09080-RA,Eaffi04572-RA,Eaff18587-RA,Eaff01580-RA,Eaff01338-RA,Eaffi07939-RA,Egulf06159-RA,Eaff11931-RA,Eaff04731-RA,Eaff01936-RA,Egulf13360-RA,Egulf15541-RA,Egulf18131-RA,Eaffi06167-RA,Eaff10158-RA,Eaffi15139-RA,Eaffi18953-RA,Eaff10707-RA,Eaff09398-RA,Eaff16534-RA,Eaffi06041-RA,Eaff00635-RA,Eaff17998-RA,Egulf14305-RA,Egulf01…
Biological process	chemical synaptic transmission	GO:0007268	8	0	1.50733	356	1102	2817	13144	Eaffi04572-RA,Eaff18587-RA,Eaff01338-RA,Eaffi09126-RA,Egulf13360-RA,Eaff10158-RA,Egulf09425-RA,Eaffi18953-RA,Egulf18704-RA,Eaff16534-RA,Eaff18894-RA,Egulf16154-RA,Eaff01084-RA,Egulf03251-RA,Egulf18372-RA,Eaff10016-RA,Egulf22131-RA,Egulf21938-RA,Egulf07470-RA,Eaff02589-RA,Eaff16264-RA,Eaff12097-RA,Eaff13502-RA,Egulf10934-RA,Eaff16598-RA,Eaff16787-RA,Egulf19357-RA,Eaff12568-RA,Egulf22344-RA,Eaff023…
Biological process	sensory perception	GO:0007600	5	0	1.72856	296	799	2817	13144	Eaff06489-RA,Egulf01045-RA,Eaff07460-RA,Eaff01338-RA,Eaffi09126-RA,Egulf13360-RA,Eaff10158-RA,Eaffi18953-RA,Eaff18894-RA,Eaff09690-RA,Egulf02334-RA,Eaff18129-RA,Eaff11639-RA,Egulf21938-RA,Egulf07470-RA,Eaffi15970-RA,Egulf10934-RA,Eaff02648-RA,Eaff16598-RA,Eaffi16810-RA,Eaffi01410-RA,Eaffi01840-RA,Eaff11087-RA,Egulf19416-RA,Egulf00537-RA,Eaffi08671-RA,Eaff10561-RA,Eaff01648-RA,Eaffi01328-RA,Egulf2…
Biological process	sensory perception of sound	GO:0007605	7	0	2.02245	127	293	2817	13144	Egulf01045-RA,Eaffi18953-RA,Eaff09690-RA,Egulf02334-RA,Eaff18129-RA,Egulf21938-RA,Egulf07470-RA,Egulf19416-RA,Eaffi08671-RA,Eaff01648-RA,Eaffi01328-RA,Eaff19053-RA,Eaff08717-RA,Egulf18406-RA,Egulf16606-RA,Eaffi21837-RA,Eaff15663-RA,Eaffi05864-RA,Egulf01052-RA,Eaff19987-RA,Egulf14314-RA,Egulf07745-RA,Eaff12371-RA,Eaff12943-RA,Egulf06473-RA,Eaffi07240-RA,Eaffi08670-RA,Eaffi18038-RA,Eaffi01177-RA,Eg…
Biological process	behavior	GO:0007610	3	0	1.49112	689	2156	2817	13144	Eaff06489-RA,Egulf20802-RA,Egulf01045-RA,Eaff07460-RA,Egulf06159-RA,Eaffi09126-RA,Egulf13360-RA,Egulf18131-RA,Eaff00291-RA,Eaffi06167-RA,Eaff10158-RA,Egulf09425-RA,Eaff04284-RA,Eaffi15139-RA,Eaffi18953-RA,Egulf14723-RA,Eaff09398-RA,Egulf04654-RA,Egulf16866-RA,Eaff16534-RA,Egulf01655-RA,Egulf15705-RA,Eaff18894-RA,Eaffi19653-RA,Eaff08622-RA,Egulf02334-RA,Eaffi10725-RA,Eaffi12832-RA,Eaff13293-RA,Egu…
Biological process	locomotory behavior	GO:0007626	4	0	1.68555	302	836	2817	13144	Egulf01045-RA,Eaffi09126-RA,Egulf13360-RA,Egulf18131-RA,Eaff00291-RA,Eaff10158-RA,Egulf09425-RA,Eaffi18953-RA,Egulf04654-RA,Eaff16534-RA,Eaff18894-RA,Eaffi19653-RA,Egulf02334-RA,Eaffi12832-RA,Eaff13293-RA,Egulf07727-RA,Eaffi12946-RA,Eaff10384-RA,Eaff02890-RA,Egulf21938-RA,Eaffi05569-RA,Eaff09656-RA,Eaffi23121-RA,Eaff13502-RA,Egulf10934-RA,Eaffi21005-RA,Eaff16598-RA,Eaff16787-RA,Egulf22344-RA,Eaff…
Biological process	jump response	GO:0007630	6	0	3.85449	38	46	2817	13144	Egulf04654-RA,Egulf21938-RA,Eaffi03766-RA,Eaff12204-RA,Egulf18406-RA,Eaffi21837-RA,Egulf17966-RA,Eaffi05864-RA,Eaff19987-RA,Egulf05598-RA,Egulf07745-RA,Eaffi07240-RA,Eaff12203-RA,Eaffi18038-RA,Egulf19242-RA,Egulf18400-RA,Eaff17232-RA,Eaff09762-RA,Egulf04479-RA,Eaffi05274-RA,Eaff12348-RA,Eaff09795-RA,Eaff14985-RA,Eaff05782-RA,Eaff01559-RA,Eaff12200-RA,Egulf09502-RA,Eaff09765-RA,Eaff11103-RA,Egulf0…
Biological process	feeding behavior	GO:0007631	4	0	1.8619	166	416	2817	13144	Egulf20802-RA,Egulf01045-RA,Eaff07460-RA,Egulf13360-RA,Egulf18131-RA,Eaffi06167-RA,Eaff10158-RA,Eaff18894-RA,Eaffi19653-RA,Eaffi12832-RA,Eaff13293-RA,Egulf18372-RA,Egulf07727-RA,Eaff19734-RA,Eaffi12946-RA,Eaff03216-RA,Eaff02890-RA,Eaffi20233-RA,Egulf18552-RA,Eaffi23121-RA,Egulf10934-RA,Eaff16598-RA,Egulf00432-RA,Eaff19614-RA,Eaff08717-RA,Eaffi21583-RA,Eaff09214-RA,Eaffi15214-RA,Eaff04968-RA,Eaff0…
Biological process	ligand-gated ion channel signaling pathway	GO:1990806	6	0	3.17544	49	72	2817	13144	Egulf13360-RA,Egulf21938-RA,Eaff16598-RA,Eaff00486-RA,Eaff03120-RA,Egulf18406-RA,Egulf01295-RA,Eaffi05864-RA,Eaff19987-RA,Egulf07745-RA,Eaffi07240-RA,Egulf09416-RA,Eaffi18038-RA,Egulf18400-RA,Egulf04530-RA,Eaff09762-RA,Eaffi15959-RA,Egulf17008-RA,Egulf04479-RA,Eaff12348-RA,Egulf20006-RA,Eaff05782-RA,Egulf20437-RA,Egulf10471-RA,Egulf01294-RA,Eaff01559-RA,Egulf01081-RA,Eaff16050-RA,Eaff04144-RA,Eaf…
Biological process	regulation of muscle system process	GO:0090257	6	0	1.8782	159	395	2817	13144	Eaffi21345-RA,Eaff01580-RA,Eaff07460-RA,Eaffi06167-RA,Egulf09425-RA,Egulf13179-RA,Egulf18921-RA,Eaff17680-RA,Eaffi23452-RA,Egulf21938-RA,Eaffi05569-RA,Eaff02589-RA,Eaffi20233-RA,Eaff09656-RA,Eaff12568-RA,Eaff02324-RA,Egulf05955-RA,Eaffi02849-RA,Eaffi17950-RA,Egulf18406-RA,Eaff20005-RA,Eaffi21837-RA,Egulf12268-RA,Eaff13349-RA,Eaff11504-RA,Egulf06586-RA,Eaffi05864-RA,Eaff16196-RA,Eaff07643-RA,Eaff1…
Biological process	negative regulation of peptide hormone secretion	GO:0090278	10	0	2.79957	66	110	2817	13144	Egulf20802-RA,Eaffi05403-RA,Egulf09425-RA,Egulf21783-RA,Eaff05926-RA,Eaff02324-RA,Eaff13349-RA,Eaff05923-RA,Egulf21779-RA,Eaffi01264-RA,Egulf16646-RA,Egulf12869-RA,Eaff01141-RA,Eaffi08650-RA,Eaffi08649-RA,Egulf14376-RA,Eaffi18104-RA,Egulf18177-RA,Egulf14970-RA,Egulf07283-RA,Eaffi02949-RA,Egulf21781-RA,Eaffi18400-RA,Egulf08691-RA,Eaff12848-RA,Egulf03894-RA,Eaff05921-RA,Egulf08386-RA,Eaff08114-RA,E…
Biological process	response to water	GO:0009415	5	0	3.6732	37	47	2817	13144	Egulf01045-RA,Eaff07460-RA,Egulf02334-RA,Eaff08717-RA,Egulf16606-RA,Egulf01052-RA,Eaff12943-RA,Egulf09620-RA,Eaff14016-RA,Egulf01248-RA,Eaff16892-RA,Egulf01049-RA,Eaff08711-RA,Egulf03766-RA,Eaff08716-RA,Egulf01041-RA,Egulf12865-RA,Egulf12881-RA,Egulf02335-RA,Eaff08713-RA,Eaffi08374-RA,Eaff09222-RA,Eaff19204-RA,Egulf01047-RA,Eaff01080-RA,Eaffi08383-RA,Egulf20091-RA,Egulf01051-RA,Egulf01621-RA,Eaff…
Biological process	response to mechanical stimulus	GO:0009612	4	0	1.91733	143	348	2817	13144	Egulf16993-RA,Eaffi23551-RA,Eaff19521-RA,Eaff17998-RA,Egulf02334-RA,Egulf09781-RA,Eaffi12423-RA,Egulf21938-RA,Eaff13502-RA,Eaff16787-RA,Egulf19416-RA,Eaffi02849-RA,Egulf18406-RA,Eaff20005-RA,Egulf16606-RA,Eaffi21837-RA,Eaffi05864-RA,Eaff16196-RA,Eaff07643-RA,Eaff19987-RA,Egulf07745-RA,Eaffi14977-RA,Eaff12371-RA,Eaff12943-RA,Egulf03323-RA,Eaff10850-RA,Eaffi17717-RA,Eaffi07240-RA,Egulf10849-RA,Egul…
Biological process	regulation of membrane potential	GO:0042391	4	0	1.7882	215	561	2817	13144	Eaffi21345-RA,Eaff06489-RA,Eaff18587-RA,Egulf13360-RA,Eaffi23551-RA,Eaffi06167-RA,Eaff10158-RA,Egulf09425-RA,Eaff02918-RA,Eaff09398-RA,Egulf04654-RA,Egulf18372-RA,Eaffi12423-RA,Egulf21938-RA,Egulf07470-RA,Eaffi20233-RA,Eaffi16011-RA,Egulf10934-RA,Eaff16598-RA,Eaffi16810-RA,Eaff02324-RA,Eaff11087-RA,Egulf00537-RA,Eaffi03766-RA,Eaff01648-RA,Eaffi01328-RA,Eaff03120-RA,Egulf13623-RA,Eaff12204-RA,Egul…
Biological process	response to abiotic stimulus	GO:0009628	3	0	1.39751	614	2050	2817	13144	Egulf04437-RA,Egulf20802-RA,Egulf01045-RA,Eaffi04572-RA,Eaff01580-RA,Eaff07460-RA,Eaffi16694-RA,Egulf16993-RA,Egulf13360-RA,Eaffi23551-RA,Eaffi15139-RA,Eaffi18953-RA,Eaff07804-RA,Eaff19521-RA,Egulf14723-RA,Eaff09398-RA,Eaff14062-RA,Egulf04654-RA,Eaff17998-RA,Egulf15705-RA,Eaffi00389-RA,Egulf02334-RA,Eaffi10725-RA,Eaff16419-RA,Eaff11676-RA,Eaff12655-RA,Egulf09781-RA,Eaff18129-RA,Eaff07841-RA,Egulf…
Biological process	establishment or maintenance of transmembrane electrochemical gradient	GO:0010248	7	0	4.26602	32	35	2817	13144	Eaff17998-RA,Egulf21938-RA,Egulf18406-RA,Eaffi21837-RA,Eaffi05864-RA,Eaff19987-RA,Egulf07745-RA,Eaffi07240-RA,Eaffi18038-RA,Egulf18400-RA,Eaff09762-RA,Egulf04479-RA,Eaff09487-RA,Eaff12348-RA,Eaff05782-RA,Eaff18149-RA,Eaff16080-RA,Eaff01559-RA,Egulf18367-RA,Eaff09732-RA,Egulf15768-RA,Egulf01323-RA,Egulf09502-RA,Eaff09765-RA,Egulf14045-RA,Eaffi10227-RA,Egulf18404-RA,Egulf19507-RA,Eaff08954-RA,Eaffi…
Biological process	intercellular transport	GO:0010496	5	0	4.66596	25	25	2817	13144	Egulf04654-RA,Eaffi03766-RA,Eaff12204-RA,Egulf17966-RA,Egulf05598-RA,Eaff12203-RA,Egulf05945-RA,Egulf11353-RA,Eaff17232-RA,Eaff03321-RA,Eaffi05274-RA,Eaff14985-RA,Eaff12200-RA,Eaff16467-RA,Eaff11103-RA,Eaffi13415-RA,Egulf05949-RA,Egulf05597-RA,Eaff14984-RA,Eaffi05782-RA,Egulf21680-RA,Eaff11110-RA,Eaff04966-RA,Egulf18332-RA,Egulf04662-RA,
Biological process	cell communication by electrical coupling	GO:0010644	4	0	3.68761	49	62	2817	13144	Egulf04654-RA,Egulf21938-RA,Eaffi03766-RA,Eaff12204-RA,Egulf18406-RA,Eaff20005-RA,Eaffi21837-RA,Egulf17966-RA,Eaffi05864-RA,Eaff19987-RA,Egulf05598-RA,Egulf07745-RA,Eaffi07240-RA,Eaff12203-RA,Eaffi18038-RA,Egulf18400-RA,Egulf05093-RA,Eaff17232-RA,Eaff09762-RA,Egulf04479-RA,Eaffi05274-RA,Eaff09487-RA,Eaff12348-RA,Eaff14985-RA,Eaff05782-RA,Eaff18149-RA,Eaff16080-RA,Eaff01559-RA,Egulf18367-RA,Eaff09…
Biological process	regulation of myosin II filament assembly	GO:0043520	10	0	4.66596	42	42	2817	13144	Egulf18131-RA,Eaffi19653-RA,Eaffi12832-RA,Eaff13293-RA,Egulf07727-RA,Eaffi12946-RA,Eaff02890-RA,Eaffi23121-RA,Egulf00432-RA,Eaffi21583-RA,Eaffi15214-RA,Eaffi02248-RA,Eaffi24006-RA,Eaffi12661-RA,Eaff04392-RA,Egulf20022-RA,Eaffi04589-RA,Eaffi13100-RA,Eaffi13522-RA,Eaffi09054-RA,Eaffi23123-RA,Egulf11145-RA,Egulf11811-RA,Eaff04775-RA,Eaffi14160-RA,Eaffi13883-RA,Eaffi13831-RA,Eaffi05729-RA,Eaffi17718-…
Biological process	regulation of synaptic activity	GO:0060025	8	0	3.65162	36	46	2817	13144	Egulf09425-RA,Eaff02324-RA,Eaff00486-RA,Eaff03120-RA,Egulf01295-RA,Eaff13349-RA,Egulf09416-RA,Eaff19403-RA,Eaffi18104-RA,Egulf14970-RA,Egulf04530-RA,Egulf17008-RA,Eaff10790-RA,Egulf08386-RA,Egulf19251-RA,Eaff03131-RA,Egulf10471-RA,Egulf01294-RA,Egulf04523-RA,Eaff16050-RA,Eaff04144-RA,Eaff08927-RA,Eaffi09942-RA,Eaff01920-RA,Eaff12302-RA,Egulf09415-RA,Egulf16856-RA,Eaffi03621-RA,Eaff12309-RA,Eaffi2…
Biological process	heart contraction	GO:0060047	6	0	1.95352	139	332	2817	13144	Eaffi21345-RA,Eaff06489-RA,Egulf09425-RA,Eaff17998-RA,Eaff11676-RA,Eaff17680-RA,Egulf21938-RA,Egulf05279-RA,Eaff02324-RA,Eaff11087-RA,Egulf00537-RA,Eaffi02849-RA,Egulf13623-RA,Egulf18406-RA,Eaff20005-RA,Eaffi21837-RA,Eaff13349-RA,Eaff11504-RA,Eaffi05864-RA,Eaff16196-RA,Eaffi04491-RA,Eaff07643-RA,Eaff19987-RA,Egulf07745-RA,Eaff12671-RA,Eaffi07240-RA,Eaff04696-RA,Eaff03814-RA,Egulf18192-RA,Eaff1940…
Biological process	cellular component assembly involved in morphogenesis	GO:0010927	6	0	1.82812	172	439	2817	13144	Eaff01580-RA,Eaff01338-RA,Egulf18131-RA,Eaff14062-RA,Eaff17998-RA,Eaffi19653-RA,Eaffi12832-RA,Eaff13293-RA,Egulf07727-RA,Eaff11203-RA,Eaffi12946-RA,Eaffi15418-RA,Eaff17680-RA,Eaffi23452-RA,Eaff11639-RA,Eaff02890-RA,Eaffi05569-RA,Eaff12209-RA,Eaff02589-RA,Eaff09656-RA,Eaffi23121-RA,Eaff12568-RA,Eaffi14578-RA,Eaffi01840-RA,Egulf02290-RA,Egulf00432-RA,Eaffi02849-RA,Eaffi17950-RA,Egulf02289-RA,Egulf1…
Biological process	cilium-dependent cell motility	GO:0060285	5	0	2.52473	79	146	2817	13144	Eaff18587-RA,Eaff11931-RA,Eaffi18953-RA,Eaff12655-RA,Eaffi21676-RA,Eaff05626-RA,Eaffi08671-RA,Eaff14476-RA,Egulf20070-RA,Egulf05924-RA,Egulf04205-RA,Eaff15663-RA,Eaff17002-RA,Eaffi05715-RA,Eaff07643-RA,Egulf15213-RA,Eaff09485-RA,Egulf14314-RA,Egulf13034-RA,Eaffi09601-RA,Egulf03789-RA,Egulf18192-RA,Eaff07081-RA,Eaffi08670-RA,Egulf19242-RA,Egulf04992-RA,Eaff10566-RA,Egulf20133-RA,Egulf05152-RA,Eaff…
Biological process	cilium movement involved in cell motility	GO:0060294	6	0	2.5961	74	133	2817	13144	Eaff18587-RA,Eaff11931-RA,Eaffi18953-RA,Eaff12655-RA,Eaffi21676-RA,Eaff05626-RA,Eaffi08671-RA,Egulf20070-RA,Egulf05924-RA,Egulf04205-RA,Eaff15663-RA,Eaff17002-RA,Eaffi05715-RA,Eaff07643-RA,Egulf15213-RA,Eaff09485-RA,Egulf14314-RA,Egulf13034-RA,Eaffi09601-RA,Egulf03789-RA,Egulf18192-RA,Eaff07081-RA,Eaffi08670-RA,Egulf19242-RA,Egulf04992-RA,Eaff10566-RA,Egulf20133-RA,Egulf05152-RA,Eaffi05184-RA,Egu…
Biological process	flight	GO:0060361	3	0	4.4287	56	59	2817	13144	Egulf18131-RA,Eaffi19653-RA,Eaffi12832-RA,Eaff13293-RA,Egulf07727-RA,Eaffi12946-RA,Eaff02890-RA,Eaffi23121-RA,Eaffi14578-RA,Egulf00432-RA,Egulf07071-RA,Eaffi21583-RA,Eaffi15214-RA,Eaffi02248-RA,Eaff04083-RA,Eaffi24006-RA,Eaffi12661-RA,Eaffi17624-RA,Eaff04392-RA,Egulf20022-RA,Egulf17724-RA,Eaffi04589-RA,Eaffi01137-RA,Eaffi13100-RA,Eaffi13522-RA,Eaffi09054-RA,Egulf09870-RA,Eaffi23123-RA,Egulf11145-…
Biological process	regulation of system process	GO:0044057	5	0	1.61856	273	787	2817	13144	Eaffi21345-RA,Eaff06489-RA,Eaff18587-RA,Eaff01580-RA,Eaff07460-RA,Eaff01338-RA,Egulf13360-RA,Eaffi06167-RA,Eaff10158-RA,Egulf09425-RA,Egulf13179-RA,Eaff17998-RA,Eaff18894-RA,Egulf18921-RA,Eaff16419-RA,Egulf18372-RA,Eaff17680-RA,Eaffi23452-RA,Egulf21938-RA,Eaffi05569-RA,Egulf07470-RA,Eaff02589-RA,Eaffi20233-RA,Eaff09656-RA,Eaff13502-RA,Egulf10934-RA,Eaff16598-RA,Eaff16787-RA,Eaff12568-RA,Eaff02324…
Biological process	skeletal muscle myosin thick filament assembly	GO:0030241	11	0	3.63786	46	59	2817	13144	Egulf18131-RA,Eaff17998-RA,Eaffi19653-RA,Eaffi12832-RA,Eaff13293-RA,Egulf07727-RA,Eaffi12946-RA,Eaff02890-RA,Eaffi23121-RA,Egulf00432-RA,Eaffi02849-RA,Eaffi21583-RA,Eaffi15214-RA,Eaffi02248-RA,Eaffi24006-RA,Eaffi12661-RA,Eaff04392-RA,Egulf20022-RA,Eaffi04589-RA,Eaffi13100-RA,Eaffi13522-RA,Eaffi09054-RA,Eaffi23123-RA,Egulf11145-RA,Egulf11811-RA,Eaff04775-RA,Eaffi14160-RA,Eaffi13883-RA,Eaffi13831-R…
Biological process	flagellated sperm motility	GO:0030317	7	0	2.65601	74	130	2817	13144	Eaff18587-RA,Eaff11931-RA,Eaffi18953-RA,Eaff12655-RA,Eaffi21676-RA,Eaff05626-RA,Eaffi08671-RA,Egulf20070-RA,Egulf05924-RA,Egulf04205-RA,Eaff15663-RA,Eaff17002-RA,Eaffi05715-RA,Eaff07643-RA,Egulf15213-RA,Eaff09485-RA,Egulf14314-RA,Egulf13034-RA,Eaffi09601-RA,Egulf03789-RA,Egulf18192-RA,Eaff07081-RA,Eaffi08670-RA,Egulf19242-RA,Egulf04992-RA,Eaff10566-RA,Egulf20133-RA,Egulf05152-RA,Eaffi05184-RA,Egu…
Biological process	negative regulation of hormone secretion	GO:0046888	9	0	2.65111	75	132	2817	13144	Egulf20802-RA,Eaffi05403-RA,Egulf09425-RA,Egulf21783-RA,Eaff18894-RA,Eaff05926-RA,Eaff02324-RA,Eaff13349-RA,Eaff05923-RA,Eaff07643-RA,Egulf21779-RA,Eaffi01264-RA,Egulf16646-RA,Egulf12869-RA,Eaff01141-RA,Eaffi08650-RA,Eaffi08649-RA,Eaff16995-RA,Egulf14376-RA,Eaffi18104-RA,Egulf18177-RA,Egulf14970-RA,Egulf07283-RA,Eaffi02949-RA,Egulf01239-RA,Egulf21781-RA,Egulf20133-RA,Eaffi18400-RA,Egulf08691-RA,E…
Biological process	actomyosin structure organization	GO:0031032	8	0	1.83906	175	444	2817	13144	Egulf20802-RA,Eaff01580-RA,Egulf06159-RA,Egulf18131-RA,Eaff17998-RA,Eaffi19653-RA,Eaff01084-RA,Eaffi12832-RA,Eaff13293-RA,Egulf21488-RA,Egulf07727-RA,Eaffi12946-RA,Eaffi13736-RA,Eaffi15418-RA,Eaff17680-RA,Eaffi23452-RA,Eaff11639-RA,Eaff02890-RA,Eaffi05569-RA,Eaff02589-RA,Eaff09656-RA,Eaffi23121-RA,Egulf11514-RA,Eaff12568-RA,Eaffi11711-RA,Eaffi14578-RA,Egulf00432-RA,Eaffi02849-RA,Eaffi17950-RA,Eaf…
Biological process	myosin filament organization	GO:0031033	8	0	2.99954	63	98	2817	13144	Egulf18131-RA,Eaff17998-RA,Eaffi19653-RA,Eaffi12832-RA,Eaff13293-RA,Egulf07727-RA,Eaffi12946-RA,Eaffi23452-RA,Eaff02890-RA,Eaffi05569-RA,Eaff09656-RA,Eaffi23121-RA,Eaffi01410-RA,Egulf00432-RA,Eaffi02849-RA,Eaffi21583-RA,Eaffi15214-RA,Eaffi02248-RA,Eaffi24006-RA,Eaffi12661-RA,Eaff04392-RA,Egulf20022-RA,Egulf07438-RA,Eaff01258-RA,Eaff06505-RA,Egulf18288-RA,Eaffi04589-RA,Eaffi13100-RA,Eaffi13522-RA,…
Biological process	myosin filament assembly	GO:0031034	9	0	3.26055	58	83	2817	13144	Egulf18131-RA,Eaff17998-RA,Eaffi19653-RA,Eaffi12832-RA,Eaff13293-RA,Egulf07727-RA,Eaffi12946-RA,Eaffi23452-RA,Eaff02890-RA,Eaffi05569-RA,Eaff09656-RA,Eaffi23121-RA,Egulf00432-RA,Eaffi02849-RA,Eaffi21583-RA,Eaffi15214-RA,Eaffi02248-RA,Eaffi24006-RA,Eaffi12661-RA,Eaff04392-RA,Egulf20022-RA,Eaff06505-RA,Egulf18288-RA,Eaffi04589-RA,Eaffi13100-RA,Eaffi13522-RA,Egulf07430-RA,Eaffi09054-RA,Eaffi23123-RA…
Biological process	myosin II filament assembly	GO:0031036	10	0	4.66596	51	51	2817	13144	Egulf18131-RA,Eaff17998-RA,Eaffi19653-RA,Eaffi12832-RA,Eaff13293-RA,Egulf07727-RA,Eaffi12946-RA,Eaffi23452-RA,Eaff02890-RA,Eaffi23121-RA,Egulf00432-RA,Eaffi21583-RA,Eaffi15214-RA,Eaffi02248-RA,Eaffi24006-RA,Eaffi12661-RA,Eaff04392-RA,Egulf20022-RA,Eaffi04589-RA,Eaffi13100-RA,Eaffi13522-RA,Egulf07430-RA,Eaffi09054-RA,Eaffi23123-RA,Egulf11145-RA,Egulf11811-RA,Eaff04775-RA,Eaffi14160-RA,Eaffi01408-R…
Biological process	myosin II filament organization	GO:0031038	9	0	3.95899	56	66	2817	13144	Egulf18131-RA,Eaff17998-RA,Eaffi19653-RA,Eaffi12832-RA,Eaff13293-RA,Egulf07727-RA,Eaffi12946-RA,Eaffi23452-RA,Eaff02890-RA,Eaffi23121-RA,Eaffi01410-RA,Egulf00432-RA,Eaffi21583-RA,Eaffi15214-RA,Eaffi02248-RA,Eaffi24006-RA,Eaffi12661-RA,Eaff04392-RA,Egulf20022-RA,Egulf07438-RA,Eaff01258-RA,Eaffi04589-RA,Eaffi13100-RA,Eaffi13522-RA,Egulf07430-RA,Eaffi09054-RA,Eaffi23123-RA,Egulf11145-RA,Egulf11811-R…
Biological process	skeletal myofibril assembly	GO:0014866	10	0	3.64172	64	82	2817	13144	Egulf18131-RA,Eaff17998-RA,Eaffi19653-RA,Eaffi12832-RA,Eaff13293-RA,Egulf07727-RA,Eaffi12946-RA,Eaff17680-RA,Eaff02890-RA,Eaffi23121-RA,Egulf00432-RA,Eaffi02849-RA,Eaffi21583-RA,Eaffi15214-RA,Eaffi02248-RA,Eaff12184-RA,Eaffi24006-RA,Eaffi12661-RA,Eaff04392-RA,Eaff16646-RA,Egulf13362-RA,Egulf20022-RA,Eaffi04589-RA,Eaffi13100-RA,Eaffi13522-RA,Eaffi02034-RA,Eaffi09054-RA,Egulf04685-RA,Eaffi23123-RA,…
Biological process	sperm motility	GO:0097722	4	0	2.61576	74	132	2817	13144	Eaff18587-RA,Eaff11931-RA,Eaffi18953-RA,Eaff12655-RA,Eaffi21676-RA,Eaff05626-RA,Eaffi08671-RA,Egulf20070-RA,Egulf05924-RA,Egulf04205-RA,Eaff15663-RA,Eaff17002-RA,Eaffi05715-RA,Eaff07643-RA,Egulf15213-RA,Eaff09485-RA,Egulf14314-RA,Egulf13034-RA,Eaffi09601-RA,Egulf03789-RA,Egulf18192-RA,Eaff07081-RA,Eaffi08670-RA,Egulf19242-RA,Egulf04992-RA,Eaff10566-RA,Egulf20133-RA,Egulf05152-RA,Eaffi05184-RA,Egu…
Biological process	multicellular organismal reproductive process	GO:0048609	3	0	1.26621	746	2749	2817	13144	Egulf04437-RA,Eaff12249-RA,Eaff06489-RA,Egulf20802-RA,Egulf01045-RA,Eaff18587-RA,Eaff01580-RA,Eaff01338-RA,Egulf06159-RA,Eaff11931-RA,Eaff04731-RA,Egulf13360-RA,Egulf15541-RA,Egulf18131-RA,Eaff04284-RA,Eaffi15139-RA,Eaffi18953-RA,Egulf01364-RA,Eaff16534-RA,Egulf01655-RA,Eaff17998-RA,Egulf14305-RA,Eaffi00389-RA,Eaffi19653-RA,Egulf16154-RA,Eaff08622-RA,Egulf18921-RA,Eaffi12832-RA,Eaff06515-RA,Egulf…
Biological process	regulation of biological quality	GO:0065008	3	0	1.26295	1306	4825	2817	13144	Eaffi21345-RA,Eaff06489-RA,Egulf20802-RA,Egulf01045-RA,Eaffi04572-RA,Eaff18587-RA,Eaff01580-RA,Eaff07460-RA,Eaff01338-RA,Eaffi05403-RA,Egulf01708-RA,Eaffi16694-RA,Eaff11931-RA,Eaffi09126-RA,Eaff01936-RA,Eaffi08922-RA,Egulf16993-RA,Egulf13360-RA,Egulf15541-RA,Eaffi23551-RA,Egulf18131-RA,Eaff00291-RA,Eaffi06167-RA,Eaff10158-RA,Egulf09425-RA,Eaff04284-RA,Eaffi15139-RA,Eaffi18953-RA,Eaff07804-RA,Eaff…
Biological process	cell motility	GO:0048870	3	0	1.38139	548	1851	2817	13144	Eaffi21345-RA,Egulf20802-RA,Egulf01045-RA,Eaff18587-RA,Eaff01338-RA,Eaff11931-RA,Egulf15541-RA,Egulf18131-RA,Eaffi18953-RA,Eaff16534-RA,Eaffi06041-RA,Eaff17998-RA,Egulf14305-RA,Eaffi00389-RA,Egulf18307-RA,Eaffi19653-RA,Egulf16154-RA,Eaff01084-RA,Eaffi12832-RA,Eaff13293-RA,Eaffi17676-RA,Egulf21488-RA,Egulf07727-RA,Eaff12655-RA,Eaff11203-RA,Egulf09781-RA,Eaff09911-RA,Eaffi21676-RA,Eaffi12946-RA,Eaf…
Biological process	multicellular organismal process	GO:0032501	2	0	1.1538	2114	8549	2817	13144	Egulf04437-RA,Eaffi21345-RA,Eaff12249-RA,Eaffi21906-RA,Eaff06489-RA,Egulf20802-RA,Egulf01045-RA,Eaff09079-RA,Eaff09080-RA,Egulf21337-RA,Eaff05827-RA,Eaffi04572-RA,Egulf12619-RA,Eaff18587-RA,Eaffi05771-RA,Eaff01580-RA,Eaff07460-RA,Eaff01338-RA,Eaff11702-RA,Egulf01708-RA,Eaffi07939-RA,Egulf06159-RA,Eaffi16694-RA,Eaffi08361-RA,Eaff11931-RA,Eaff04731-RA,Eaffi09126-RA,Eaff01936-RA,Eaffi08922-RA,Egulf1…
Biological process	establishment or maintenance of polarity of follicular epithelium	GO:0016334	4	0	2.99954	54	84	2817	13144	Eaffi14436-RA,Egulf20135-RA,Eaff09599-RA,Eaffi15323-RA,Eaff13403-RA,Eaff17411-RA,Eaffi08714-RA,Egulf06558-RA,Eaffi00536-RA,Egulf14376-RA,Eaff03354-RA,Eaff07155-RA,Eaffi18400-RA,Eaff07908-RA,Eaffi08302-RA,Eaff19959-RA,Eaffi05196-RA,Eaffi02095-RA,Egulf09650-RA,Egulf15904-RA,Eaff06642-RA,Egulf20871-RA,Eaff00516-RA,Eaff11771-RA,Eaffi03951-RA,Egulf12193-RA,Eaff06776-RA,Egulf12196-RA,Egulf03237-RA,Eaff…
Biological process	synaptic signaling	GO:0099536	5	1.11022e-16	1.5026	361	1121	2817	13144	Eaffi04572-RA,Eaff18587-RA,Eaff01338-RA,Eaffi09126-RA,Egulf13360-RA,Eaff10158-RA,Egulf09425-RA,Eaffi18953-RA,Egulf18704-RA,Eaff16534-RA,Eaff18894-RA,Egulf16154-RA,Eaff01084-RA,Egulf03251-RA,Egulf18372-RA,Eaff10016-RA,Egulf22131-RA,Egulf21938-RA,Egulf07470-RA,Eaff02589-RA,Eaff16264-RA,Eaff12097-RA,Eaff13502-RA,Egulf10934-RA,Eaff16598-RA,Eaff16787-RA,Egulf19357-RA,Eaff12568-RA,Egulf22344-RA,Eaff023…
Biological process	modulation of chemical synaptic transmission	GO:0050804	7	1.11022e-16	1.76285	252	667	2817	13144	Eaff18587-RA,Eaffi09126-RA,Egulf13360-RA,Egulf09425-RA,Eaffi18953-RA,Eaff16534-RA,Eaff01084-RA,Egulf03251-RA,Egulf18372-RA,Egulf22131-RA,Egulf21938-RA,Eaff02589-RA,Eaff16264-RA,Eaff13502-RA,Eaff16598-RA,Eaff16787-RA,Eaff12568-RA,Eaff02324-RA,Eaff00486-RA,Eaff11087-RA,Egulf19416-RA,Egulf18134-RA,Eaffi08671-RA,Eaff10561-RA,Eaff16589-RA,Egulf15955-RA,Egulf22044-RA,Eaff17411-RA,Eaff03120-RA,Egulf0592…
Biological process	nervous system process	GO:0050877	4	1.11022e-16	1.45176	500	1607	2817	13144	Eaff06489-RA,Egulf01045-RA,Eaff18587-RA,Eaff07460-RA,Eaff01338-RA,Eaffi09126-RA,Egulf13360-RA,Eaff10158-RA,Eaffi15139-RA,Eaffi18953-RA,Egulf16866-RA,Egulf01655-RA,Eaff17998-RA,Eaff18894-RA,Eaff09690-RA,Egulf02334-RA,Egulf18372-RA,Eaff18129-RA,Eaff18959-RA,Eaff17680-RA,Eaff11639-RA,Egulf22131-RA,Egulf21938-RA,Egulf07470-RA,Eaff02589-RA,Eaff16264-RA,Eaffi15970-RA,Egulf02306-RA,Eaff13502-RA,Egulf109…
Biological process	regulation of sodium ion transmembrane transport	GO:1902305	9	1.11022e-16	3.06803	48	73	2817	13144	Eaff09398-RA,Egulf21938-RA,Egulf18406-RA,Eaffi05864-RA,Eaff19987-RA,Egulf07745-RA,Eaffi07240-RA,Eaffi18038-RA,Egulf18400-RA,Eaff09762-RA,Egulf17769-RA,Eaff19401-RA,Egulf04479-RA,Eaff09487-RA,Eaff12348-RA,Eaff05782-RA,Eaff18149-RA,Eaff16080-RA,Egulf17820-RA,Egulf17227-RA,Eaff01559-RA,Egulf18367-RA,Eaff09732-RA,Eaff14890-RA,Eaff09399-RA,Egulf15768-RA,Egulf01323-RA,Eaffi22699-RA,Egulf20876-RA,Egulf0…
Biological process	muscle system process	GO:0003012	4	1.11022e-16	1.99863	269	628	2817	13144	Eaffi21345-RA,Eaff06489-RA,Eaff01580-RA,Eaff07460-RA,Egulf18131-RA,Eaffi06167-RA,Eaff10158-RA,Egulf09425-RA,Eaff01363-RA,Egulf13179-RA,Eaff17998-RA,Eaff18894-RA,Eaffi19653-RA,Egulf18921-RA,Eaffi12832-RA,Eaff13293-RA,Eaff11676-RA,Egulf07727-RA,Eaffi12946-RA,Egulf14595-RA,Eaff17680-RA,Eaffi23452-RA,Eaff02890-RA,Egulf21938-RA,Eaffi05569-RA,Eaff02589-RA,Eaffi20233-RA,Eaff09656-RA,Eaffi23121-RA,Egulf1…
Biological process	cilium movement	GO:0003341	5	1.11022e-16	2.29344	87	177	2817	13144	Eaff18587-RA,Eaff11931-RA,Eaffi18953-RA,Eaff16534-RA,Eaff12655-RA,Eaffi21676-RA,Eaff05626-RA,Eaffi08671-RA,Egulf20070-RA,Egulf05924-RA,Egulf04205-RA,Eaff15663-RA,Eaff17002-RA,Eaffi05715-RA,Eaff07643-RA,Egulf15213-RA,Eaff09485-RA,Egulf14314-RA,Egulf13034-RA,Eaffi09601-RA,Egulf13427-RA,Egulf03789-RA,Egulf18192-RA,Eaff07081-RA,Eaffi08670-RA,Eaffi03599-RA,Egulf19242-RA,Egulf04992-RA,Eaff10566-RA,Egul…
Biological process	regulation of monoatomic cation transmembrane transport	GO:1904062	8	1.11022e-16	1.93602	139	335	2817	13144	Eaffi21345-RA,Eaffi08922-RA,Egulf13360-RA,Eaff09398-RA,Egulf18921-RA,Egulf21938-RA,Eaff16598-RA,Eaffi10278-RA,Egulf05955-RA,Eaff11087-RA,Egulf18134-RA,Egulf00537-RA,Egulf00279-RA,Eaffi13587-RA,Eaff08383-RA,Egulf18406-RA,Eaff20005-RA,Eaff16655-RA,Eaffi05740-RA,Egulf06586-RA,Eaffi05864-RA,Eaff19987-RA,Eaffi13559-RA,Egulf07745-RA,Eaff12671-RA,Eaffi07240-RA,Eaff03814-RA,Eaff14297-RA,Eaff12317-RA,Eaff…
Biological process	muscle cell development	GO:0055001	5	1.11022e-16	1.86437	185	463	2817	13144	Eaff01580-RA,Egulf18131-RA,Egulf13179-RA,Eaff17998-RA,Eaffi19653-RA,Eaffi12832-RA,Eaff13293-RA,Egulf07727-RA,Egulf09781-RA,Eaffi12946-RA,Eaffi15418-RA,Eaff17680-RA,Eaffi23452-RA,Eaff11639-RA,Eaff02890-RA,Eaffi05569-RA,Eaff02589-RA,Eaff09656-RA,Eaffi23121-RA,Eaff12568-RA,Eaffi14578-RA,Egulf00537-RA,Eaff12603-RA,Egulf00432-RA,Eaffi02849-RA,Eaffi17950-RA,Egulf05615-RA,Eaff20005-RA,Eaffi21583-RA,Egul…
Biological process	striated muscle cell development	GO:0055002	6	1.11022e-16	1.97537	174	411	2817	13144	Eaff01580-RA,Egulf18131-RA,Egulf13179-RA,Eaff17998-RA,Eaffi19653-RA,Eaffi12832-RA,Eaff13293-RA,Egulf07727-RA,Egulf09781-RA,Eaffi12946-RA,Eaffi15418-RA,Eaff17680-RA,Eaffi23452-RA,Eaff11639-RA,Eaff02890-RA,Eaffi05569-RA,Eaff02589-RA,Eaff09656-RA,Eaffi23121-RA,Eaff12568-RA,Eaffi14578-RA,Egulf00537-RA,Eaff12603-RA,Egulf00432-RA,Eaffi02849-RA,Eaffi17950-RA,Egulf05615-RA,Eaff20005-RA,Eaffi21583-RA,Egul…
Biological process	obsolete metal ion homeostasis	GO:0055065	0	1.11022e-16	1.76003	235	623	2817	13144	Egulf01045-RA,Eaff01580-RA,Eaff07460-RA,Eaffi09126-RA,Egulf13360-RA,Eaffi23551-RA,Eaff17998-RA,Eaff18894-RA,Eaffi12423-RA,Eaff10384-RA,Eaff17680-RA,Eaff11639-RA,Egulf21938-RA,Eaff16598-RA,Eaffi16810-RA,Eaffi14067-RA,Eaffi01410-RA,Eaff11087-RA,Eaffi17950-RA,Eaff10561-RA,Eaffi13587-RA,Egulf03616-RA,Eaff03120-RA,Eaff08717-RA,Egulf18406-RA,Eaff20005-RA,Egulf17127-RA,Eaffi21837-RA,Eaff02518-RA,Eaff166…
Biological process	muscle thin filament assembly	GO:0071689	7	1.11022e-16	3.94306	60	71	2817	13144	Egulf18131-RA,Eaffi19653-RA,Eaffi12832-RA,Eaff13293-RA,Egulf07727-RA,Eaffi12946-RA,Eaff02890-RA,Eaffi05569-RA,Eaff09656-RA,Eaffi23121-RA,Egulf00432-RA,Eaffi02849-RA,Eaffi21583-RA,Eaffi15214-RA,Eaffi02248-RA,Eaff12184-RA,Eaffi24006-RA,Eaffi12661-RA,Eaff04392-RA,Egulf20022-RA,Egulf18288-RA,Eaffi04589-RA,Eaffi13100-RA,Eaffi13522-RA,Eaffi02034-RA,Eaffi09054-RA,Egulf04685-RA,Eaffi23123-RA,Egulf04219-R…
Biological process	obsolete cellular divalent inorganic cation homeostasis	GO:0072503	0	1.11022e-16	1.85206	181	456	2817	13144	Eaff07460-RA,Eaffi09126-RA,Egulf13360-RA,Eaffi23551-RA,Eaff17998-RA,Eaff18894-RA,Eaffi12423-RA,Eaff10384-RA,Eaff17680-RA,Eaff11639-RA,Egulf21938-RA,Eaff16598-RA,Eaffi16810-RA,Eaffi14067-RA,Eaffi01410-RA,Eaff11087-RA,Eaff10561-RA,Eaff03120-RA,Egulf18406-RA,Eaff20005-RA,Eaff02518-RA,Eaff16655-RA,Egulf01295-RA,Eaffi05864-RA,Eaff05947-RA,Eaff07643-RA,Egulf05895-RA,Eaff19987-RA,Eaffi13559-RA,Egulf0774…
Biological process	adult somatic muscle development	GO:0007527	6	1.11022e-16	3.54876	54	71	2817	13144	Egulf18131-RA,Eaffi19653-RA,Eaffi12832-RA,Eaff13293-RA,Egulf07727-RA,Eaffi12946-RA,Eaff02890-RA,Eaffi23121-RA,Egulf00432-RA,Eaffi21583-RA,Eaffi15214-RA,Eaffi02248-RA,Eaffi24006-RA,Eaffi12661-RA,Eaff04392-RA,Egulf20022-RA,Eaff00927-RA,Eaffi04589-RA,Eaffi13100-RA,Eaff10861-RA,Eaffi13522-RA,Eaffi09054-RA,Eaffi23123-RA,Egulf11145-RA,Egulf11811-RA,Egulf07041-RA,Eaffi11935-RA,Eaffi14119-RA,Egulf19567-R…
Biological process	imaginal disc morphogenesis	GO:0007560	6	1.11022e-16	1.60268	282	821	2817	13144	Egulf20802-RA,Egulf01045-RA,Eaff01580-RA,Eaffi18953-RA,Egulf13179-RA,Eaff17998-RA,Egulf01414-RA,Egulf18307-RA,Egulf16154-RA,Eaff01084-RA,Eaff06515-RA,Eaff19966-RA,Eaff11203-RA,Egulf09781-RA,Eaffi13736-RA,Egulf15807-RA,Eaff17989-RA,Eaffi23452-RA,Eaff11639-RA,Eaff02589-RA,Eaff09039-RA,Eaff12568-RA,Eaff06378-RA,Eaffi03884-RA,Egulf21098-RA,Eaffi08671-RA,Eaffi17950-RA,Eaff13289-RA,Egulf18569-RA,Eaff01…
Biological process	regulation of heart contraction	GO:0008016	7	1.11022e-16	1.98099	121	285	2817	13144	Eaffi21345-RA,Eaff06489-RA,Egulf09425-RA,Eaff17998-RA,Eaff17680-RA,Egulf21938-RA,Eaff02324-RA,Eaff11087-RA,Egulf00537-RA,Egulf13623-RA,Egulf18406-RA,Eaff20005-RA,Eaffi21837-RA,Eaff13349-RA,Eaff11504-RA,Eaffi05864-RA,Eaff16196-RA,Eaff07643-RA,Eaff19987-RA,Egulf07745-RA,Eaff12671-RA,Eaffi07240-RA,Eaff04696-RA,Eaff03814-RA,Egulf18192-RA,Eaff19403-RA,Eaff16646-RA,Egulf13362-RA,Eaffi18104-RA,Eaff15766…
Biological process	metal ion transport	GO:0030001	7	1.11022e-16	1.59384	331	969	2817	13144	Eaffi21345-RA,Eaff06489-RA,Eaff07460-RA,Eaff17478-RA,Eaffi09126-RA,Eaffi08922-RA,Egulf13360-RA,Eaffi06167-RA,Egulf09425-RA,Eaff09398-RA,Eaff17998-RA,Eaff04677-RA,Egulf02334-RA,Eaff16308-RA,Eaff11639-RA,Egulf21938-RA,Eaffi20233-RA,Egulf06466-RA,Eaff16598-RA,Eaff15089-RA,Eaffi16810-RA,Eaffi14067-RA,Eaffi10278-RA,Eaff02324-RA,Eaff03683-RA,Eaff00486-RA,Eaff11087-RA,Egulf00537-RA,Egulf00279-RA,Eaff105…
Biological process	trans-synaptic signaling	GO:0099537	6	2.22045e-16	1.49512	356	1111	2817	13144	Eaffi04572-RA,Eaff18587-RA,Eaff01338-RA,Eaffi09126-RA,Egulf13360-RA,Eaff10158-RA,Egulf09425-RA,Eaffi18953-RA,Egulf18704-RA,Eaff16534-RA,Eaff18894-RA,Egulf16154-RA,Eaff01084-RA,Egulf03251-RA,Egulf18372-RA,Eaff10016-RA,Egulf22131-RA,Egulf21938-RA,Egulf07470-RA,Eaff02589-RA,Eaff16264-RA,Eaff12097-RA,Eaff13502-RA,Egulf10934-RA,Eaff16598-RA,Eaff16787-RA,Egulf19357-RA,Eaff12568-RA,Egulf22344-RA,Eaff023…
Biological process	glutamate receptor signaling pathway	GO:0007215	7	2.22045e-16	2.41127	77	149	2817	13144	Egulf13360-RA,Egulf09425-RA,Egulf18372-RA,Egulf21938-RA,Eaff16598-RA,Eaff02324-RA,Eaff00486-RA,Egulf18134-RA,Eaff03120-RA,Egulf18406-RA,Egulf01295-RA,Eaffi05740-RA,Eaff13349-RA,Eaff09736-RA,Eaffi05864-RA,Eaff19987-RA,Egulf07745-RA,Eaffi07240-RA,Egulf09416-RA,Eaffi18104-RA,Eaffi18038-RA,Egulf14970-RA,Egulf18400-RA,Egulf04530-RA,Eaff09762-RA,Egulf18370-RA,Eaffi15959-RA,Egulf17008-RA,Eaff10790-RA,Eg…
Biological process	metamorphosis	GO:0007552	5	2.22045e-16	1.50899	304	940	2817	13144	Egulf20802-RA,Egulf01045-RA,Eaff01580-RA,Eaff04284-RA,Eaffi18953-RA,Egulf13179-RA,Eaff17998-RA,Egulf01414-RA,Egulf18307-RA,Egulf16154-RA,Eaff01084-RA,Eaff06515-RA,Eaff11676-RA,Eaff19966-RA,Eaff11203-RA,Egulf09781-RA,Eaffi13736-RA,Egulf15807-RA,Eaff17989-RA,Eaffi23452-RA,Eaff11639-RA,Eaff02589-RA,Eaff09039-RA,Egulf05279-RA,Eaff17367-RA,Eaff12568-RA,Eaff06378-RA,Eaffi03884-RA,Egulf21098-RA,Eaffi086…
Biological process	myofibril assembly	GO:0030239	9	2.22045e-16	2.36	131	259	2817	13144	Eaff01580-RA,Egulf18131-RA,Eaff17998-RA,Eaffi19653-RA,Eaffi12832-RA,Eaff13293-RA,Egulf07727-RA,Eaffi12946-RA,Eaffi15418-RA,Eaff17680-RA,Eaffi23452-RA,Eaff11639-RA,Eaff02890-RA,Eaffi05569-RA,Eaff02589-RA,Eaff09656-RA,Eaffi23121-RA,Eaff12568-RA,Eaffi14578-RA,Egulf00432-RA,Eaffi02849-RA,Eaffi17950-RA,Eaffi21583-RA,Eaffi15214-RA,Eaffi02248-RA,Eaff04083-RA,Eaff12184-RA,Eaffi24006-RA,Eaffi12661-RA,Eaff…
Biological process	ammonium homeostasis	GO:0097272	5	2.22045e-16	4.66596	23	23	2817	13144	Egulf01045-RA,Egulf03616-RA,Eaff08717-RA,Egulf14236-RA,Egulf01052-RA,Eaffi24131-RA,Egulf00082-RA,Egulf01049-RA,Eaff08711-RA,Eaff13076-RA,Eaff15916-RA,Eaff08716-RA,Egulf01041-RA,Eaff08713-RA,Eaffi08374-RA,Eaff07830-RA,Egulf01047-RA,Eaffi08383-RA,Egulf01051-RA,Eaff08715-RA,Eaffi08376-RA,Eaff08718-RA,Eaffi08380-RA,
Biological process	imaginal disc-derived appendage development	GO:0048737	5	2.22045e-16	1.62906	243	696	2817	13144	Egulf20802-RA,Egulf01045-RA,Eaff01580-RA,Egulf13179-RA,Eaff17998-RA,Egulf01414-RA,Egulf18307-RA,Egulf16154-RA,Eaff01084-RA,Eaff06515-RA,Eaff19966-RA,Egulf09781-RA,Eaffi13736-RA,Egulf15807-RA,Eaffi23452-RA,Eaff11639-RA,Eaff02589-RA,Eaff09039-RA,Eaff12568-RA,Eaff06378-RA,Eaffi03884-RA,Egulf21098-RA,Eaffi17950-RA,Egulf18569-RA,Eaff01879-RA,Egulf05924-RA,Eaff08717-RA,Eaffi19660-RA,Eaff14233-RA,Egulf1…
Biological process	chemical homeostasis	GO:0048878	3	2.22045e-16	1.42842	424	1385	2817	13144	Egulf01045-RA,Eaffi04572-RA,Eaff01580-RA,Eaff07460-RA,Egulf01708-RA,Eaff11931-RA,Eaffi09126-RA,Egulf13360-RA,Eaffi23551-RA,Egulf09425-RA,Egulf21783-RA,Eaff09398-RA,Egulf04654-RA,Egulf21133-RA,Eaff17998-RA,Eaff18894-RA,Eaffi16723-RA,Eaff16419-RA,Egulf18372-RA,Eaffi12423-RA,Eaff10384-RA,Eaff17680-RA,Eaff03916-RA,Eaff11639-RA,Egulf21938-RA,Eaff02589-RA,Eaff05926-RA,Eaff12097-RA,Eaff16598-RA,Eaffi168…
Biological process	localization	GO:0051179	2	3.33067e-16	1.17751	1683	6669	2817	13144	Egulf04437-RA,Eaffi21345-RA,Eaffi21906-RA,Eaff06489-RA,Egulf20802-RA,Egulf01045-RA,Eaff15515-RA,Eaff09079-RA,Eaff09080-RA,Egulf21337-RA,Eaffi04572-RA,Eaff18587-RA,Eaff01580-RA,Eaff07460-RA,Eaff01338-RA,Eaff11702-RA,Eaffi05403-RA,Eaffi07939-RA,Eaffi16694-RA,Eaffi08361-RA,Eaff11931-RA,Eaff17478-RA,Eaffi09126-RA,Eaff01936-RA,Eaffi08922-RA,Egulf16993-RA,Egulf13360-RA,Egulf15541-RA,Egulf18131-RA,Eaffi…
Biological process	establishment of localization	GO:0051234	3	3.33067e-16	1.18189	1343	5302	2817	13144	Egulf04437-RA,Eaffi21345-RA,Eaffi21906-RA,Eaff06489-RA,Egulf20802-RA,Egulf01045-RA,Eaff15515-RA,Eaff09079-RA,Eaff09080-RA,Egulf21337-RA,Eaffi04572-RA,Eaff01580-RA,Eaff07460-RA,Eaff11702-RA,Eaffi05403-RA,Eaffi07939-RA,Eaffi08361-RA,Eaff11931-RA,Eaff17478-RA,Eaffi09126-RA,Eaff01936-RA,Eaffi08922-RA,Egulf16993-RA,Egulf13360-RA,Eaffi06167-RA,Eaff10158-RA,Egulf09425-RA,Eaffi15139-RA,Eaffi18953-RA,Eaff…
Biological process	aggressive behavior	GO:0002118	4	3.33067e-16	3.54613	38	50	2817	13144	Egulf01045-RA,Eaff07423-RA,Eaff13502-RA,Eaff16787-RA,Egulf10298-RA,Eaff08717-RA,Eaff07643-RA,Egulf01052-RA,Egulf10849-RA,Eaff04008-RA,Egulf15932-RA,Egulf02856-RA,Eaff18675-RA,Eaff03795-RA,Egulf10392-RA,Egulf11685-RA,Egulf01049-RA,Eaff08711-RA,Eaff08716-RA,Eaff05258-RA,Egulf01041-RA,Egulf13030-RA,Eaff08713-RA,Eaffi08374-RA,Eaffi16722-RA,Egulf01047-RA,Eaffi08383-RA,Egulf01051-RA,Eaff05216-RA,Egulf1…
Biological process	obsolete multi-organism process	GO:0051704	0	3.33067e-16	1.23324	933	3530	2817	13144	Egulf04437-RA,Eaff12249-RA,Eaffi21906-RA,Eaff06489-RA,Egulf20802-RA,Egulf01045-RA,Eaff15515-RA,Eaffi04572-RA,Eaff18587-RA,Eaff01580-RA,Eaff01338-RA,Eaff11931-RA,Eaff04731-RA,Egulf13360-RA,Egulf15541-RA,Egulf18131-RA,Eaff10158-RA,Eaff04284-RA,Eaffi15139-RA,Eaffi18953-RA,Egulf07740-RA,Egulf01364-RA,Egulf14723-RA,Eaff16534-RA,Egulf01655-RA,Egulf13179-RA,Eaff17998-RA,Egulf14305-RA,Egulf15705-RA,Eaffi…
Biological process	potassium ion transmembrane transport	GO:0071805	9	3.33067e-16	2.65782	135	237	2817	13144	Eaffi21345-RA,Eaff06489-RA,Eaffi08922-RA,Egulf09425-RA,Eaff17998-RA,Eaff16308-RA,Egulf21938-RA,Eaff15089-RA,Eaffi16810-RA,Eaffi10278-RA,Eaff02324-RA,Eaff00486-RA,Eaff10561-RA,Eaff03120-RA,Egulf13623-RA,Egulf18406-RA,Eaffi21837-RA,Egulf01295-RA,Eaff13349-RA,Eaffi05864-RA,Eaff19987-RA,Egulf07745-RA,Eaffi07240-RA,Egulf09416-RA,Eaff19403-RA,Eaff12317-RA,Egulf18099-RA,Egulf19307-RA,Eaffi18104-RA,Eaffi…
Biological process	monoatomic cation transport	GO:0006812	6	3.33067e-16	1.5713	426	1265	2817	13144	Eaffi21345-RA,Eaff06489-RA,Eaff15515-RA,Eaffi04572-RA,Eaff07460-RA,Eaff17478-RA,Eaffi09126-RA,Eaffi08922-RA,Egulf13360-RA,Eaffi06167-RA,Egulf09425-RA,Eaffi15139-RA,Eaff09398-RA,Eaff17998-RA,Eaff13715-RA,Eaff04677-RA,Egulf02334-RA,Egulf18921-RA,Eaff16419-RA,Eaff03123-RA,Eaff16308-RA,Eaff11639-RA,Egulf21938-RA,Egulf07470-RA,Eaffi20233-RA,Eaff12097-RA,Egulf06466-RA,Eaff02648-RA,Eaff16598-RA,Eaff1508…
Biological process	post-embryonic animal organ morphogenesis	GO:0048563	5	3.33067e-16	1.602	286	833	2817	13144	Egulf20802-RA,Egulf01045-RA,Eaff01580-RA,Eaff01338-RA,Eaffi18953-RA,Egulf13179-RA,Eaff17998-RA,Egulf01414-RA,Egulf18307-RA,Egulf16154-RA,Eaff01084-RA,Eaff06515-RA,Eaff19966-RA,Eaff11203-RA,Egulf09781-RA,Eaffi13736-RA,Egulf15807-RA,Eaff17989-RA,Eaffi23452-RA,Eaff11639-RA,Eaff02589-RA,Eaff09039-RA,Eaff12568-RA,Eaff06378-RA,Eaffi01840-RA,Eaffi03884-RA,Egulf21098-RA,Eaffi08671-RA,Eaffi17950-RA,Eaff13…
Biological process	action potential	GO:0001508	5	4.44089e-16	2.65202	133	234	2817	13144	Eaffi21345-RA,Eaffi06167-RA,Eaff10158-RA,Egulf09425-RA,Eaff09398-RA,Egulf21938-RA,Egulf07470-RA,Eaffi20233-RA,Eaffi16011-RA,Egulf10934-RA,Eaff02324-RA,Eaff11087-RA,Egulf00537-RA,Eaff03120-RA,Egulf18406-RA,Eaff20005-RA,Eaffi21837-RA,Eaff13349-RA,Eaff04968-RA,Eaffi05864-RA,Egulf02145-RA,Eaff07643-RA,Egulf01899-RA,Eaff19987-RA,Egulf07745-RA,Eaffi13417-RA,Eaff12671-RA,Eaffi01325-RA,Eaffi07240-RA,Egul…
Biological process	system process	GO:0003008	3	4.44089e-16	1.47028	755	2396	2817	13144	Eaffi21345-RA,Eaff06489-RA,Egulf01045-RA,Eaff18587-RA,Eaff01580-RA,Eaff07460-RA,Eaff01338-RA,Eaffi09126-RA,Egulf13360-RA,Egulf18131-RA,Eaffi06167-RA,Eaff10158-RA,Egulf09425-RA,Eaff12454-RA,Eaffi15139-RA,Eaffi18953-RA,Eaff01363-RA,Egulf16866-RA,Egulf01655-RA,Egulf13179-RA,Eaff17998-RA,Eaff18894-RA,Eaff09690-RA,Eaffi00389-RA,Eaffi19653-RA,Egulf02334-RA,Egulf18921-RA,Eaff16419-RA,Eaffi12832-RA,Eaff1…
Biological process	heart process	GO:0003015	5	4.44089e-16	1.88706	146	361	2817	13144	Eaffi21345-RA,Eaff06489-RA,Egulf09425-RA,Eaff17998-RA,Eaff11676-RA,Eaff17680-RA,Egulf21938-RA,Egulf05279-RA,Eaff02324-RA,Eaff11087-RA,Egulf00537-RA,Eaffi02849-RA,Egulf13623-RA,Egulf18406-RA,Eaff20005-RA,Eaffi21837-RA,Eaff13349-RA,Eaff11504-RA,Eaffi05864-RA,Eaff16196-RA,Eaffi04491-RA,Eaff07643-RA,Eaffi08714-RA,Eaff19987-RA,Egulf07745-RA,Eaff12671-RA,Eaffi07240-RA,Eaff04696-RA,Eaff03814-RA,Egulf181…
Biological process	regulation of myosin II filament organization	GO:0043519	9	4.44089e-16	3.84737	47	57	2817	13144	Egulf18131-RA,Eaffi19653-RA,Eaffi12832-RA,Eaff13293-RA,Egulf07727-RA,Eaffi12946-RA,Eaff02890-RA,Eaffi23121-RA,Eaffi01410-RA,Egulf00432-RA,Eaffi21583-RA,Eaffi15214-RA,Eaffi02248-RA,Eaffi24006-RA,Eaffi12661-RA,Eaff04392-RA,Egulf20022-RA,Egulf07438-RA,Eaff01258-RA,Eaffi04589-RA,Eaffi13100-RA,Eaffi13522-RA,Eaffi09054-RA,Eaffi23123-RA,Egulf11145-RA,Egulf11811-RA,Eaff11178-RA,Eaff04775-RA,Eaffi14160-RA…
Biological process	regulation of transport	GO:0051049	5	5.55112e-16	1.3266	580	2040	2817	13144	Eaffi21345-RA,Egulf20802-RA,Egulf01045-RA,Eaff01580-RA,Eaff07460-RA,Eaffi05403-RA,Eaff11931-RA,Eaffi08922-RA,Egulf16993-RA,Egulf13360-RA,Egulf09425-RA,Eaffi18953-RA,Egulf21783-RA,Eaff19521-RA,Eaffi06179-RA,Eaff09398-RA,Egulf11560-RA,Eaff16534-RA,Eaffi06041-RA,Eaff17998-RA,Egulf07575-RA,Eaff18894-RA,Eaffi14783-RA,Egulf18921-RA,Eaff01084-RA,Eaff16419-RA,Egulf07306-RA,Egulf18372-RA,Egulf21488-RA,Egu…
Biological process	intracellular calcium ion homeostasis	GO:0006874	7	5.55112e-16	1.80457	181	468	2817	13144	Eaff07460-RA,Eaffi09126-RA,Egulf13360-RA,Eaffi23551-RA,Eaff17998-RA,Eaff18894-RA,Eaffi12423-RA,Eaff10384-RA,Eaff17680-RA,Eaff11639-RA,Egulf21938-RA,Eaff16598-RA,Eaffi16810-RA,Eaffi14067-RA,Eaffi01410-RA,Eaff11087-RA,Eaff10561-RA,Eaff03120-RA,Egulf18406-RA,Eaff20005-RA,Eaff02518-RA,Eaff16655-RA,Egulf01295-RA,Eaffi05864-RA,Eaff05947-RA,Eaff07643-RA,Egulf05895-RA,Eaff19987-RA,Eaffi13559-RA,Egulf0774…
Biological process	intracellular sodium ion homeostasis	GO:0006883	7	5.55112e-16	3.75553	33	41	2817	13144	Egulf21938-RA,Egulf18406-RA,Eaffi21837-RA,Eaffi05864-RA,Eaff19987-RA,Egulf07745-RA,Eaffi07240-RA,Eaffi18038-RA,Egulf18400-RA,Eaff09762-RA,Egulf17769-RA,Egulf04479-RA,Eaff09487-RA,Eaff12348-RA,Eaff05782-RA,Eaff18149-RA,Eaff16080-RA,Eaff01559-RA,Egulf18367-RA,Eaff09732-RA,Egulf15768-RA,Egulf01323-RA,Eaffi22699-RA,Egulf09502-RA,Eaff09765-RA,Egulf14045-RA,Egulf18404-RA,Egulf19507-RA,Eaffi03012-RA,Eaf…
Biological process	regulation of RNA splicing	GO:0043484	8	5.55112e-16	1.87991	139	345	2817	13144	Egulf04437-RA,Eaff18587-RA,Egulf14723-RA,Eaff18703-RA,Egulf15705-RA,Eaff08622-RA,Eaffi10725-RA,Egulf07306-RA,Eaff11688-RA,Eaffi03550-RA,Egulf18552-RA,Eaffi14436-RA,Eaffi16011-RA,Eaff15146-RA,Egulf22344-RA,Eaff19614-RA,Eaff13403-RA,Egulf20070-RA,Egulf04939-RA,Egulf16111-RA,Eaffi01285-RA,Eaffi06050-RA,Eaff17712-RA,Egulf15213-RA,Eaff12358-RA,Eaff05959-RA,Eaffi02751-RA,Eaffi02155-RA,Egulf21377-RA,Egu…
Biological process	relaxation of cardiac muscle	GO:0055119	6	6.66134e-16	3.52327	37	49	2817	13144	Egulf21938-RA,Eaffi02849-RA,Egulf18406-RA,Eaffi21837-RA,Eaff11504-RA,Eaffi05864-RA,Eaff19987-RA,Egulf07745-RA,Eaffi07240-RA,Eaff03814-RA,Eaffi18038-RA,Egulf18400-RA,Eaff09762-RA,Eaff07985-RA,Egulf04479-RA,Eaff11503-RA,Eaff09487-RA,Eaff12348-RA,Eaffi04814-RA,Eaff05782-RA,Eaff18149-RA,Eaff16080-RA,Eaff01559-RA,Egulf18367-RA,Eaff09732-RA,Egulf15768-RA,Egulf01323-RA,Egulf09502-RA,Egulf05514-RA,Eaff09…
Biological process	positive regulation of ovulation	GO:0060279	6	6.66134e-16	3.26617	42	60	2817	13144	Egulf18131-RA,Eaffi19653-RA,Eaffi12832-RA,Eaff13293-RA,Egulf07727-RA,Eaffi12946-RA,Eaff02890-RA,Eaffi23121-RA,Egulf00432-RA,Eaffi21583-RA,Eaffi15214-RA,Eaffi02248-RA,Eaffi24006-RA,Eaffi12661-RA,Eaff04392-RA,Egulf20022-RA,Eaffi04589-RA,Eaffi13100-RA,Eaffi13522-RA,Eaffi09054-RA,Eaffi23123-RA,Egulf11145-RA,Egulf11811-RA,Eaff04775-RA,Eaffi14160-RA,Eaffi13883-RA,Eaffi13831-RA,Eaffi05729-RA,Eaffi17718-…
Biological process	striated muscle cell differentiation	GO:0051146	6	7.77156e-16	1.61821	223	643	2817	13144	Eaff06489-RA,Eaff01580-RA,Eaff11931-RA,Egulf16993-RA,Egulf18131-RA,Eaff19521-RA,Egulf13179-RA,Eaff17998-RA,Eaffi19653-RA,Eaffi12832-RA,Eaff13293-RA,Egulf07727-RA,Egulf09781-RA,Eaff19734-RA,Eaffi12946-RA,Eaffi15418-RA,Eaff17680-RA,Eaffi23452-RA,Eaff11639-RA,Eaff02890-RA,Eaffi05569-RA,Eaff02589-RA,Eaff09656-RA,Eaffi23121-RA,Eaff12568-RA,Eaffi14578-RA,Egulf00537-RA,Eaff12603-RA,Egulf00432-RA,Eaffi02…
Biological process	membrane repolarization during cardiac muscle cell action potential	GO:0086013	7	7.77156e-16	3.68936	34	43	2817	13144	Eaffi21345-RA,Egulf21938-RA,Egulf18406-RA,Eaffi21837-RA,Eaffi05864-RA,Eaff19987-RA,Egulf07745-RA,Eaffi07240-RA,Eaffi18038-RA,Egulf18400-RA,Eaff09762-RA,Eaff20185-RA,Egulf04479-RA,Eaff09487-RA,Eaff12348-RA,Egulf04910-RA,Eaff05782-RA,Eaff18149-RA,Eaff16080-RA,Eaff01559-RA,Egulf18367-RA,Eaff09732-RA,Eaff13756-RA,Egulf15768-RA,Egulf01323-RA,Egulf09502-RA,Eaff09765-RA,Egulf18404-RA,Egulf19507-RA,Eaff0…
Biological process	transport	GO:0006810	4	7.77156e-16	1.19104	1310	5132	2817	13144	Egulf04437-RA,Eaffi21345-RA,Eaffi21906-RA,Eaff06489-RA,Egulf20802-RA,Egulf01045-RA,Eaff15515-RA,Eaff09079-RA,Eaff09080-RA,Egulf21337-RA,Eaffi04572-RA,Eaff01580-RA,Eaff07460-RA,Eaff11702-RA,Eaffi05403-RA,Eaffi07939-RA,Eaffi08361-RA,Eaff11931-RA,Eaff17478-RA,Eaffi09126-RA,Eaffi08922-RA,Egulf16993-RA,Egulf13360-RA,Eaffi06167-RA,Eaff10158-RA,Egulf09425-RA,Eaffi15139-RA,Eaffi18953-RA,Eaff02918-RA,Eaff…
Biological process	calcium ion transport	GO:0006816	8	7.77156e-16	1.74973	177	472	2817	13144	Eaff07460-RA,Eaffi09126-RA,Egulf13360-RA,Eaffi06167-RA,Egulf02334-RA,Eaff11639-RA,Egulf21938-RA,Eaffi20233-RA,Eaff16598-RA,Eaffi14067-RA,Eaff11087-RA,Egulf00537-RA,Egulf00279-RA,Eaff10561-RA,Eaff03120-RA,Eaff08383-RA,Egulf18406-RA,Eaff20005-RA,Egulf16606-RA,Eaff16655-RA,Egulf01295-RA,Eaffi05864-RA,Eaff05947-RA,Eaff19987-RA,Eaffi13559-RA,Egulf07745-RA,Eaff12371-RA,Eaff12943-RA,Eaff08079-RA,Eaff126…
Biological process	adult locomotory behavior	GO:0008344	5	7.77156e-16	1.84116	146	370	2817	13144	Egulf01045-RA,Egulf13360-RA,Eaff00291-RA,Eaff10158-RA,Egulf04654-RA,Egulf02334-RA,Egulf21938-RA,Eaffi05569-RA,Eaff09656-RA,Egulf10934-RA,Eaff16598-RA,Egulf22344-RA,Eaff11087-RA,Egulf00537-RA,Eaffi03766-RA,Eaff08717-RA,Eaff12204-RA,Egulf18406-RA,Egulf16606-RA,Eaffi21837-RA,Eaff10037-RA,Egulf17966-RA,Eaff04968-RA,Eaffi05864-RA,Egulf02145-RA,Egulf01052-RA,Egulf01899-RA,Eaff19987-RA,Egulf05598-RA,Egu…
Biological process	system development	GO:0048731	4	7.77156e-16	1.16428	1447	5799	2817	13144	Egulf04437-RA,Eaffi21345-RA,Eaff06489-RA,Egulf20802-RA,Egulf01045-RA,Eaff09079-RA,Eaff09080-RA,Egulf21337-RA,Eaff05827-RA,Eaffi04572-RA,Egulf12619-RA,Eaff18587-RA,Eaffi05771-RA,Eaff01580-RA,Eaff07460-RA,Eaff01338-RA,Eaff11702-RA,Egulf01708-RA,Eaffi07939-RA,Eaffi16694-RA,Eaff04731-RA,Eaffi09126-RA,Eaffi08922-RA,Egulf16993-RA,Egulf13360-RA,Egulf15541-RA,Egulf18131-RA,Eaff00291-RA,Eaffi06167-RA,Eaff…
Biological process	multicellular organism development	GO:0007275	4	8.88178e-16	1.1277	1679	6947	2817	13144	Egulf04437-RA,Eaffi21345-RA,Eaffi21906-RA,Eaff06489-RA,Egulf20802-RA,Egulf01045-RA,Eaff09079-RA,Eaff09080-RA,Egulf21337-RA,Eaff05827-RA,Eaffi04572-RA,Egulf12619-RA,Eaff18587-RA,Eaffi05771-RA,Eaff01580-RA,Eaff07460-RA,Eaff01338-RA,Eaff11702-RA,Egulf01708-RA,Eaffi07939-RA,Egulf06159-RA,Eaffi16694-RA,Eaff11931-RA,Eaff04731-RA,Eaffi09126-RA,Eaff01936-RA,Eaffi08922-RA,Egulf16993-RA,Egulf13360-RA,Egulf…
Biological process	sarcomere organization	GO:0045214	9	8.88178e-16	2.19014	92	196	2817	13144	Egulf18131-RA,Eaff17998-RA,Eaffi19653-RA,Eaffi12832-RA,Eaff13293-RA,Egulf07727-RA,Eaffi12946-RA,Eaffi15418-RA,Eaff17680-RA,Eaff11639-RA,Eaff02890-RA,Eaffi05569-RA,Eaff02589-RA,Eaff09656-RA,Eaffi23121-RA,Eaff12568-RA,Eaffi14578-RA,Egulf00432-RA,Eaffi02849-RA,Eaffi21583-RA,Eaffi15214-RA,Eaffi02248-RA,Eaffi24006-RA,Eaffi12661-RA,Eaff04392-RA,Eaff16646-RA,Egulf13362-RA,Egulf20022-RA,Egulf20214-RA,Eaf…
Biological process	cardiac muscle contraction	GO:0060048	7	9.99201e-16	2.30487	82	166	2817	13144	Eaffi21345-RA,Eaff17998-RA,Eaff11676-RA,Eaff17680-RA,Egulf21938-RA,Egulf05279-RA,Egulf00537-RA,Eaffi02849-RA,Egulf18406-RA,Eaff20005-RA,Eaffi21837-RA,Eaff11504-RA,Eaffi05864-RA,Eaff16196-RA,Eaffi04491-RA,Eaff19987-RA,Egulf07745-RA,Eaff12671-RA,Eaffi07240-RA,Eaff03814-RA,Eaff16646-RA,Egulf13362-RA,Eaffi18038-RA,Egulf18400-RA,Egulf05093-RA,Eaff09762-RA,Egulf13893-RA,Eaff07985-RA,Egulf07821-RA,Eaffi…
Biological process	multi-organism reproductive process	GO:0044703	3	9.99201e-16	1.26531	733	2703	2817	13144	Egulf04437-RA,Eaff12249-RA,Eaffi21906-RA,Eaff06489-RA,Egulf20802-RA,Egulf01045-RA,Eaff18587-RA,Eaff01580-RA,Eaff01338-RA,Eaff11931-RA,Eaff04731-RA,Egulf13360-RA,Egulf15541-RA,Egulf18131-RA,Eaff10158-RA,Eaff04284-RA,Eaffi15139-RA,Eaffi18953-RA,Egulf01364-RA,Eaff16534-RA,Egulf01655-RA,Egulf13179-RA,Eaff17998-RA,Egulf14305-RA,Eaffi00389-RA,Eaffi19653-RA,Egulf16154-RA,Eaff08622-RA,Egulf18921-RA,Eaffi…
Biological process	regulation of sodium ion transmembrane transporter activity	GO:2000649	10	1.11022e-15	3.04583	47	72	2817	13144	Eaff09398-RA,Egulf21938-RA,Egulf18406-RA,Eaffi05864-RA,Eaff19987-RA,Egulf07745-RA,Eaffi07240-RA,Eaffi18038-RA,Egulf18400-RA,Eaff09762-RA,Egulf17769-RA,Eaff19401-RA,Egulf04479-RA,Eaff09487-RA,Eaff12348-RA,Eaff05782-RA,Eaff18149-RA,Eaff16080-RA,Egulf17820-RA,Egulf17227-RA,Eaff01559-RA,Egulf18367-RA,Eaff09732-RA,Eaff14890-RA,Eaff09399-RA,Egulf15768-RA,Egulf01323-RA,Eaffi22699-RA,Egulf20876-RA,Egulf0…
Biological process	cellular homeostasis	GO:0019725	3	1.11022e-15	1.43568	368	1196	2817	13144	Egulf01045-RA,Eaffi04572-RA,Eaff01580-RA,Eaff07460-RA,Eaffi09126-RA,Eaff01936-RA,Egulf13360-RA,Eaffi23551-RA,Egulf09425-RA,Egulf21783-RA,Egulf21133-RA,Eaff00635-RA,Eaff17998-RA,Egulf14305-RA,Eaff18894-RA,Egulf18372-RA,Eaffi12423-RA,Eaff10384-RA,Eaff17680-RA,Eaff03916-RA,Eaff11639-RA,Egulf21938-RA,Eaff02589-RA,Eaff05926-RA,Eaff12097-RA,Eaffi04334-RA,Eaff16598-RA,Eaffi16810-RA,Eaffi14067-RA,Eaff125…
Biological process	response to BMP	GO:0071772	5	1.22125e-15	1.96461	120	285	2817	13144	Egulf20802-RA,Egulf01045-RA,Eaff01580-RA,Eaff17998-RA,Egulf16154-RA,Eaff12209-RA,Egulf04503-RA,Eaffi17950-RA,Eaffi21782-RA,Eaff03120-RA,Egulf05615-RA,Eaff08717-RA,Eaff20005-RA,Egulf17127-RA,Eaff02518-RA,Eaff10037-RA,Eaffi09259-RA,Eaff16196-RA,Eaff05947-RA,Egulf01052-RA,Eaff18857-RA,Egulf22016-RA,Egulf03323-RA,Eaff18521-RA,Egulf18719-RA,Egulf09416-RA,Eaffi23554-RA,Eaff13951-RA,Eaffi20926-RA,Egulf0…
Biological process	sensory organ morphogenesis	GO:0090596	5	1.22125e-15	1.49771	312	972	2817	13144	Egulf04437-RA,Egulf01045-RA,Eaff09079-RA,Eaff09080-RA,Eaff01338-RA,Egulf01708-RA,Eaffi07939-RA,Eaffi09126-RA,Eaffi18953-RA,Eaff10707-RA,Eaff16534-RA,Egulf13179-RA,Egulf11154-RA,Eaff17998-RA,Egulf14305-RA,Egulf16154-RA,Eaff06515-RA,Egulf09781-RA,Eaffi03550-RA,Eaff11639-RA,Egulf02306-RA,Eaffi16011-RA,Eaffi16810-RA,Egulf19357-RA,Eaffi01840-RA,Eaff00651-RA,Egulf21098-RA,Eaffi08671-RA,Eaffi16624-RA,Ea…
Biological process	ovulation	GO:0030728	4	1.55431e-15	2.70625	58	100	2817	13144	Egulf18131-RA,Eaffi19653-RA,Egulf18921-RA,Eaffi12832-RA,Eaff13293-RA,Egulf07727-RA,Eaffi12946-RA,Eaff02890-RA,Eaffi23121-RA,Egulf05955-RA,Egulf00432-RA,Eaffi21583-RA,Eaffi15214-RA,Egulf06586-RA,Eaffi02248-RA,Eaffi24006-RA,Eaffi12661-RA,Eaff04392-RA,Egulf20022-RA,Eaff00543-RA,Eaff08702-RA,Eaffi04589-RA,Eaffi13100-RA,Eaffi13522-RA,Eaffi09054-RA,Eaffi23123-RA,Egulf11145-RA,Egulf11811-RA,Eaffi05271-R…
Biological process	response to glycoside	GO:1903416	5	1.66533e-15	4.66596	22	22	2817	13144	Eaff16419-RA,Egulf21938-RA,Egulf18406-RA,Eaffi21837-RA,Eaffi05864-RA,Eaff19987-RA,Egulf07745-RA,Eaffi07240-RA,Eaffi18038-RA,Egulf18400-RA,Eaff09762-RA,Egulf04479-RA,Eaff12348-RA,Eaff05782-RA,Eaff01559-RA,Egulf09502-RA,Eaff09765-RA,Egulf18404-RA,Egulf19507-RA,Eaffi23876-RA,Eaff18076-RA,Eaffi01721-RA,
Biological process	regulation of blood circulation	GO:1903522	6	1.66533e-15	1.89199	133	328	2817	13144	Eaffi21345-RA,Eaff06489-RA,Egulf09425-RA,Eaff17998-RA,Eaff18894-RA,Eaff17680-RA,Egulf21938-RA,Eaff02324-RA,Eaff11087-RA,Egulf00537-RA,Egulf13623-RA,Egulf18406-RA,Eaff20005-RA,Eaffi21837-RA,Eaff13349-RA,Eaff11504-RA,Eaffi05864-RA,Eaff16196-RA,Eaff07643-RA,Eaff19987-RA,Egulf07745-RA,Eaff12671-RA,Eaffi07240-RA,Eaff04696-RA,Eaff03814-RA,Egulf18192-RA,Eaff19403-RA,Eaff16995-RA,Eaff16646-RA,Egulf13362-…
Biological process	instar larval or pupal morphogenesis	GO:0048707	5	1.66533e-15	1.50597	295	914	2817	13144	Egulf20802-RA,Egulf01045-RA,Eaff01580-RA,Eaff04284-RA,Eaffi18953-RA,Egulf13179-RA,Eaff17998-RA,Egulf01414-RA,Egulf18307-RA,Egulf16154-RA,Eaff01084-RA,Eaff06515-RA,Eaff11676-RA,Eaff19966-RA,Eaff11203-RA,Egulf09781-RA,Eaffi13736-RA,Egulf15807-RA,Eaff17989-RA,Eaffi23452-RA,Eaff11639-RA,Eaff02589-RA,Eaff09039-RA,Egulf05279-RA,Eaff12568-RA,Eaff06378-RA,Eaffi03884-RA,Egulf21098-RA,Eaffi08671-RA,Eaffi17…
Biological process	response to acid chemical	GO:0001101	4	1.88738e-15	1.70523	182	498	2817	13144	Egulf04437-RA,Egulf20802-RA,Egulf01045-RA,Eaff07460-RA,Egulf13360-RA,Eaff10158-RA,Egulf13179-RA,Eaff17998-RA,Egulf02334-RA,Eaff16419-RA,Eaff19173-RA,Eaffi03550-RA,Eaff03916-RA,Egulf21938-RA,Egulf10934-RA,Eaff16598-RA,Eaffi01410-RA,Eaffi13587-RA,Eaff17411-RA,Egulf05924-RA,Egulf02644-RA,Eaff08717-RA,Egulf18406-RA,Egulf04939-RA,Egulf16111-RA,Egulf16606-RA,Egulf12268-RA,Eaff04968-RA,Eaffi05864-RA,Eaf…
Biological process	appendage development	GO:0048736	4	1.88738e-15	1.52116	282	865	2817	13144	Egulf20802-RA,Egulf01045-RA,Eaff01580-RA,Egulf01708-RA,Egulf13179-RA,Eaff17998-RA,Egulf01414-RA,Egulf18307-RA,Egulf16154-RA,Eaff01084-RA,Eaff06515-RA,Eaff19966-RA,Egulf09781-RA,Eaffi13736-RA,Egulf15807-RA,Eaffi23452-RA,Eaff11639-RA,Eaff19058-RA,Eaff02589-RA,Egulf02306-RA,Eaff09039-RA,Egulf19357-RA,Eaff12568-RA,Eaff06378-RA,Eaffi03884-RA,Eaff00651-RA,Egulf21098-RA,Eaffi17950-RA,Egulf18569-RA,Eaff0…
Biological process	membrane depolarization during action potential	GO:0086010	6	2.10942e-15	2.96925	49	77	2817	13144	Eaffi06167-RA,Eaff09398-RA,Egulf21938-RA,Eaffi20233-RA,Eaff11087-RA,Egulf00537-RA,Egulf18406-RA,Eaffi05864-RA,Eaff19987-RA,Egulf07745-RA,Eaff12671-RA,Eaffi07240-RA,Eaff15766-RA,Eaffi18038-RA,Egulf18400-RA,Eaffi18296-RA,Eaff09762-RA,Egulf14908-RA,Egulf04479-RA,Eaff12348-RA,Eaffi05023-RA,Egulf04910-RA,Eaff05782-RA,Eaff08233-RA,Eaffi03176-RA,Eaff15736-RA,Eaff06204-RA,Egulf05959-RA,Egulf08312-RA,Eaff…
Biological process	appendage morphogenesis	GO:0035107	4	2.44249e-15	1.53253	269	819	2817	13144	Egulf20802-RA,Egulf01045-RA,Eaff01580-RA,Egulf01708-RA,Egulf13179-RA,Eaff17998-RA,Egulf01414-RA,Egulf18307-RA,Egulf16154-RA,Eaff01084-RA,Eaff06515-RA,Eaff19966-RA,Egulf09781-RA,Eaffi13736-RA,Egulf15807-RA,Eaffi23452-RA,Eaff11639-RA,Eaff02589-RA,Egulf02306-RA,Eaff09039-RA,Eaff12568-RA,Eaff06378-RA,Eaffi03884-RA,Eaff00651-RA,Egulf21098-RA,Eaffi17950-RA,Egulf18569-RA,Eaff01879-RA,Egulf05924-RA,Egulf…
Biological process	regulation of tube length, open tracheal system	GO:0035159	7	2.66454e-15	2.57856	63	114	2817	13144	Egulf01708-RA,Eaff16534-RA,Eaff17998-RA,Eaff09911-RA,Eaffi23452-RA,Egulf21938-RA,Eaff00651-RA,Eaffi11384-RA,Egulf18406-RA,Eaffi21837-RA,Eaffi05864-RA,Eaff19987-RA,Egulf07745-RA,Eaffi07605-RA,Egulf13427-RA,Eaffi07240-RA,Eaffi18038-RA,Egulf18400-RA,Eaff15702-RA,Eaff09762-RA,Eaffi18448-RA,Egulf13428-RA,Egulf07430-RA,Eaff16547-RA,Egulf14348-RA,Egulf04479-RA,Eaff12348-RA,Eaffi14184-RA,Eaffi06080-RA,Ea…
Biological process	regulation of alternative mRNA splicing, via spliceosome	GO:0000381	11	3.33067e-15	2.1229	96	211	2817	13144	Eaff18587-RA,Egulf14723-RA,Eaff18703-RA,Egulf15705-RA,Eaffi10725-RA,Egulf07306-RA,Eaff11688-RA,Egulf18552-RA,Eaffi16011-RA,Eaff15146-RA,Eaff19614-RA,Egulf20070-RA,Eaffi01285-RA,Eaffi06050-RA,Eaff17712-RA,Egulf15213-RA,Eaff12358-RA,Eaff05959-RA,Eaffi02751-RA,Eaffi02155-RA,Egulf21377-RA,Egulf13675-RA,Eaffi09601-RA,Egulf13366-RA,Egulf04607-RA,Egulf19030-RA,Egulf04505-RA,Eaff07081-RA,Eaffi15366-RA,Ea…
Biological process	regulation of muscle contraction	GO:0006937	7	3.44169e-15	1.94014	121	291	2817	13144	Eaffi21345-RA,Eaff07460-RA,Eaffi06167-RA,Egulf09425-RA,Egulf18921-RA,Eaff17680-RA,Eaffi23452-RA,Egulf21938-RA,Eaffi05569-RA,Eaff02589-RA,Eaffi20233-RA,Eaff09656-RA,Eaff12568-RA,Eaff02324-RA,Egulf05955-RA,Egulf18406-RA,Eaff20005-RA,Eaffi21837-RA,Eaff13349-RA,Eaff11504-RA,Egulf06586-RA,Eaffi05864-RA,Eaff16196-RA,Eaff07643-RA,Eaff19987-RA,Egulf07745-RA,Eaffi07240-RA,Eaff03814-RA,Eaff19403-RA,Eaff166…
Biological process	second-messenger-mediated signaling	GO:0019932	7	3.55271e-15	1.75647	163	433	2817	13144	Eaff07460-RA,Eaff01338-RA,Egulf13360-RA,Eaffi06167-RA,Egulf18921-RA,Eaff12655-RA,Eaff10384-RA,Egulf21938-RA,Eaffi20233-RA,Eaff18318-RA,Eaff16598-RA,Eaffi16810-RA,Egulf05955-RA,Eaffi01410-RA,Eaffi01840-RA,Eaff11087-RA,Egulf00537-RA,Eaff03120-RA,Egulf18406-RA,Eaff20005-RA,Egulf01295-RA,Egulf04205-RA,Egulf06586-RA,Eaffi05864-RA,Eaff19987-RA,Egulf07745-RA,Eaff12671-RA,Eaff07846-RA,Eaffi07240-RA,Egulf…
Biological process	sexual reproduction	GO:0019953	3	3.66374e-15	1.26484	717	2645	2817	13144	Egulf04437-RA,Eaff12249-RA,Eaffi21906-RA,Eaff06489-RA,Egulf20802-RA,Egulf01045-RA,Egulf12619-RA,Eaff18587-RA,Eaff01580-RA,Eaff01338-RA,Eaff11931-RA,Eaff04731-RA,Egulf13360-RA,Egulf15541-RA,Egulf18131-RA,Eaff10158-RA,Eaff04284-RA,Eaffi15139-RA,Eaffi18953-RA,Egulf01364-RA,Eaff16534-RA,Egulf01655-RA,Eaff17998-RA,Egulf14305-RA,Eaffi00389-RA,Eaffi19653-RA,Egulf16154-RA,Eaff08622-RA,Egulf18921-RA,Eaffi…
Biological process	membrane repolarization during action potential	GO:0086011	6	3.88578e-15	3.60551	34	44	2817	13144	Eaffi21345-RA,Egulf21938-RA,Egulf18406-RA,Eaffi21837-RA,Eaffi05864-RA,Eaff19987-RA,Egulf07745-RA,Eaffi07240-RA,Eaffi18038-RA,Egulf18400-RA,Eaff09762-RA,Eaff20185-RA,Egulf04479-RA,Eaff09487-RA,Eaff12348-RA,Egulf04910-RA,Eaff05782-RA,Eaff18149-RA,Eaff16080-RA,Eaff01559-RA,Egulf18367-RA,Eaff09732-RA,Eaff13756-RA,Egulf15768-RA,Egulf01323-RA,Egulf09502-RA,Eaff09765-RA,Egulf18404-RA,Egulf19507-RA,Eaff0…
Biological process	cardiac muscle cell action potential involved in contraction	GO:0086002	7	4.21885e-15	3.27436	40	57	2817	13144	Eaffi21345-RA,Egulf21938-RA,Egulf00537-RA,Egulf18406-RA,Eaff20005-RA,Eaffi21837-RA,Eaffi05864-RA,Eaff19987-RA,Egulf07745-RA,Eaff12671-RA,Eaffi07240-RA,Eaffi18038-RA,Egulf18400-RA,Egulf05093-RA,Eaff09762-RA,Egulf17769-RA,Egulf04479-RA,Eaff12348-RA,Egulf04910-RA,Eaff05782-RA,Eaff08233-RA,Eaffi03176-RA,Eaff15736-RA,Eaffi08938-RA,Eaff01559-RA,Eaffi22699-RA,Egulf09502-RA,Eaff11833-RA,Eaffi04288-RA,Eaf…
Biological process	cardiac muscle cell action potential	GO:0086001	6	5.9952e-15	2.8329	51	84	2817	13144	Eaffi21345-RA,Egulf21938-RA,Egulf00537-RA,Egulf18406-RA,Eaff20005-RA,Eaffi21837-RA,Eaffi05864-RA,Eaff19987-RA,Egulf07745-RA,Eaff12671-RA,Eaffi07240-RA,Eaffi18038-RA,Egulf18400-RA,Egulf05093-RA,Eaff09762-RA,Eaff20185-RA,Egulf17769-RA,Egulf04479-RA,Eaff09487-RA,Eaff12348-RA,Egulf04910-RA,Eaff05782-RA,Eaff08233-RA,Eaffi03176-RA,Eaff15736-RA,Eaff18149-RA,Eaff16080-RA,Eaffi08938-RA,Eaff01559-RA,Egulf1…
Biological process	response to amyloid-beta	GO:1904645	7	5.9952e-15	2.96351	47	74	2817	13144	Egulf21938-RA,Egulf00537-RA,Egulf18406-RA,Eaffi05864-RA,Eaff19987-RA,Egulf07745-RA,Eaff12671-RA,Eaffi07240-RA,Egulf18192-RA,Eaffi18038-RA,Egulf19242-RA,Egulf18400-RA,Eaff10566-RA,Eaff09762-RA,Egulf18239-RA,Eaff01192-RA,Egulf11950-RA,Egulf04479-RA,Eaff12348-RA,Eaff09795-RA,Eaff09544-RA,Eaff05782-RA,Eaff08233-RA,Eaffi03176-RA,Eaff10560-RA,Eaff15736-RA,Eaff09600-RA,Eaffi05420-RA,Eaffi08938-RA,Eaffi0…
Biological process	sensory organ development	GO:0007423	5	5.9952e-15	1.36239	459	1572	2817	13144	Egulf04437-RA,Egulf20802-RA,Egulf01045-RA,Eaff09079-RA,Eaff09080-RA,Eaffi04572-RA,Eaff18587-RA,Eaff01338-RA,Egulf01708-RA,Eaffi07939-RA,Eaffi09126-RA,Eaff00291-RA,Eaffi18953-RA,Eaff10707-RA,Eaff16534-RA,Egulf13179-RA,Egulf11154-RA,Eaff17998-RA,Egulf14305-RA,Eaff09690-RA,Egulf18307-RA,Egulf16154-RA,Eaff01084-RA,Eaff06515-RA,Eaff11676-RA,Egulf09781-RA,Eaffi03550-RA,Eaff11639-RA,Egulf07470-RA,Eaff02…
Biological process	muscle cell differentiation	GO:0042692	5	6.21725e-15	1.53211	264	804	2817	13144	Eaff06489-RA,Eaff01580-RA,Eaff11931-RA,Egulf16993-RA,Egulf18131-RA,Eaff19521-RA,Egulf13179-RA,Eaff17998-RA,Eaffi19653-RA,Eaff08622-RA,Eaffi12832-RA,Eaff13293-RA,Egulf07727-RA,Egulf09781-RA,Eaff19734-RA,Eaffi12946-RA,Eaffi15418-RA,Eaff17680-RA,Eaffi23452-RA,Eaff11639-RA,Eaff02890-RA,Eaffi05569-RA,Eaff02589-RA,Eaff09656-RA,Eaffi23121-RA,Eaff12568-RA,Eaffi14578-RA,Egulf00537-RA,Eaff12603-RA,Egulf004…
Biological process	germ-line stem cell population maintenance	GO:0030718	5	8.54872e-15	2.17251	88	189	2817	13144	Egulf01045-RA,Eaff01580-RA,Egulf16154-RA,Egulf03251-RA,Eaff12209-RA,Egulf18605-RA,Eaffi14578-RA,Egulf04503-RA,Eaffi17950-RA,Eaff16589-RA,Eaff13289-RA,Egulf05924-RA,Eaff08717-RA,Eaffi23010-RA,Eaffi05715-RA,Egulf01052-RA,Eaff09485-RA,Eaff18857-RA,Eaffi06013-RA,Eaffi19879-RA,Eaffi18325-RA,Egulf10874-RA,Egulf05945-RA,Eaff09789-RA,Egulf11353-RA,Eaff17428-RA,Eaffi05184-RA,Egulf12171-RA,Egulf13353-RA,Ea…
Biological process	synaptic transmission, glycinergic	GO:0060012	9	8.65974e-15	4.66596	21	21	2817	13144	Eaff10158-RA,Egulf07470-RA,Egulf10934-RA,Eaff04968-RA,Egulf20268-RA,Egulf02145-RA,Egulf01899-RA,Eaffi13417-RA,Eaff04548-RA,Eaff14433-RA,Eaffi06391-RA,Eaff19211-RA,Eaff04595-RA,Egulf20678-RA,Egulf11354-RA,Eaff07294-RA,Egulf10869-RA,Eaff07012-RA,Egulf20267-RA,Egulf18832-RA,Egulf21404-RA,
Biological process	calcium ion transmembrane transport	GO:0070588	9	8.88178e-15	1.78369	151	395	2817	13144	Egulf13360-RA,Eaffi06167-RA,Egulf02334-RA,Eaff11639-RA,Egulf21938-RA,Eaffi20233-RA,Eaff16598-RA,Eaffi14067-RA,Eaff11087-RA,Egulf00537-RA,Egulf00279-RA,Eaff10561-RA,Eaff03120-RA,Eaff08383-RA,Egulf18406-RA,Eaff20005-RA,Egulf16606-RA,Egulf01295-RA,Eaffi05864-RA,Eaff05947-RA,Eaff19987-RA,Egulf07745-RA,Eaff12371-RA,Eaff12943-RA,Eaff12671-RA,Eaffi07240-RA,Egulf09416-RA,Eaff03814-RA,Egulf18192-RA,Eaff14…
Biological process	response to stimulus	GO:0050896	2	1.04361e-14	1.09754	1942	8256	2817	13144	Egulf04437-RA,Eaffi21345-RA,Eaffi21906-RA,Eaff06489-RA,Egulf20802-RA,Egulf01045-RA,Eaff15515-RA,Eaff09079-RA,Eaff09080-RA,Egulf21337-RA,Eaff05827-RA,Eaffi04572-RA,Eaff18587-RA,Eaffi05771-RA,Eaff01580-RA,Eaff07460-RA,Eaff01338-RA,Eaff11702-RA,Eaffi05403-RA,Egulf01708-RA,Egulf03455-RA,Eaffi07939-RA,Eaffi16694-RA,Eaffi08361-RA,Eaff11931-RA,Eaff04731-RA,Eaffi09126-RA,Eaffi08922-RA,Egulf16993-RA,Egulf…
Biological process	cell communication by electrical coupling involved in cardiac conduction	GO:0086064	5	1.19904e-14	3.52539	34	45	2817	13144	Egulf21938-RA,Egulf18406-RA,Eaff20005-RA,Eaffi21837-RA,Eaffi05864-RA,Eaff19987-RA,Egulf07745-RA,Eaffi07240-RA,Eaffi18038-RA,Egulf18400-RA,Egulf05093-RA,Eaff09762-RA,Egulf04479-RA,Eaff09487-RA,Eaff12348-RA,Eaff05782-RA,Eaff18149-RA,Eaff16080-RA,Eaff01559-RA,Egulf18367-RA,Eaff09732-RA,Egulf15768-RA,Egulf01323-RA,Egulf09502-RA,Eaff11833-RA,Eaffi04288-RA,Eaff09765-RA,Egulf14045-RA,Egulf18404-RA,Egulf…
Biological process	inter-male aggressive behavior	GO:0002121	5	1.35447e-14	3.58085	33	43	2817	13144	Egulf01045-RA,Eaff07423-RA,Eaff13502-RA,Eaff16787-RA,Egulf10298-RA,Eaff08717-RA,Egulf01052-RA,Egulf10849-RA,Eaff04008-RA,Egulf15932-RA,Egulf02856-RA,Eaff18675-RA,Egulf10392-RA,Egulf11685-RA,Egulf01049-RA,Eaff08711-RA,Eaff08716-RA,Eaff05258-RA,Egulf01041-RA,Egulf13030-RA,Eaff08713-RA,Eaffi08374-RA,Eaffi16722-RA,Egulf01047-RA,Eaffi08383-RA,Egulf01051-RA,Eaff08715-RA,Eaffi08376-RA,Eaff03983-RA,Eaffi…
Biological process	gamma-aminobutyric acid signaling pathway	GO:0007214	5	1.44329e-14	3.86608	29	35	2817	13144	Egulf07470-RA,Eaff13502-RA,Eaff16787-RA,Egulf00537-RA,Eaff01648-RA,Eaffi01328-RA,Eaff12671-RA,Egulf10849-RA,Egulf02856-RA,Egulf11685-RA,Eaff01292-RA,Eaff08114-RA,Eaff08233-RA,Eaffi03176-RA,Eaff05258-RA,Eaff15736-RA,Egulf00403-RA,Egulf20678-RA,Eaff08115-RA,Eaffi08938-RA,Egulf13030-RA,Egulf16155-RA,Eaffi16722-RA,Eaff07012-RA,Egulf07844-RA,Egulf14503-RA,Eaffi18487-RA,Eaffi13744-RA,Egulf04090-RA,
Biological process	sodium ion export across plasma membrane	GO:0036376	10	1.5099e-14	3.70884	31	39	2817	13144	Egulf21938-RA,Egulf18406-RA,Eaffi21837-RA,Eaffi05864-RA,Eaff19987-RA,Egulf07745-RA,Eaffi07240-RA,Eaffi18038-RA,Egulf18400-RA,Eaff09762-RA,Egulf04479-RA,Eaff09487-RA,Eaff12348-RA,Eaff05782-RA,Eaff18149-RA,Eaff16080-RA,Eaff01559-RA,Egulf18367-RA,Eaff09732-RA,Egulf15768-RA,Egulf01323-RA,Egulf20876-RA,Egulf09502-RA,Eaff09765-RA,Egulf14045-RA,Egulf18404-RA,Egulf19507-RA,Eaff08954-RA,Eaffi23876-RA,Eaff…
Biological process	post-embryonic animal organ development	GO:0048569	5	1.5099e-14	1.42549	355	1162	2817	13144	Egulf20802-RA,Egulf01045-RA,Eaff01580-RA,Eaff01338-RA,Eaff04731-RA,Eaffi18953-RA,Egulf01655-RA,Egulf13179-RA,Eaff17998-RA,Egulf01414-RA,Egulf18307-RA,Egulf16154-RA,Eaff01084-RA,Eaff06515-RA,Eaff19966-RA,Eaff11203-RA,Egulf09781-RA,Eaffi13736-RA,Egulf15807-RA,Eaff17989-RA,Eaffi23452-RA,Eaff11639-RA,Eaff02589-RA,Eaff09039-RA,Eaff18318-RA,Eaff12568-RA,Eaff06378-RA,Egulf20135-RA,Eaffi01840-RA,Eaffi038…
Biological process	developmental process	GO:0032502	2	1.68754e-14	1.10649	1821	7679	2817	13144	Egulf04437-RA,Eaffi21345-RA,Eaff12249-RA,Eaffi21906-RA,Eaff06489-RA,Egulf20802-RA,Egulf01045-RA,Eaff09079-RA,Eaff09080-RA,Egulf21337-RA,Eaff05827-RA,Eaffi04572-RA,Egulf12619-RA,Eaff18587-RA,Eaffi05771-RA,Eaff01580-RA,Eaff07460-RA,Eaff01338-RA,Eaff11702-RA,Egulf01708-RA,Eaffi07939-RA,Egulf06159-RA,Eaffi16694-RA,Eaff11931-RA,Eaff04731-RA,Eaffi09126-RA,Eaff01936-RA,Eaffi08922-RA,Egulf16993-RA,Egulf1…
Biological process	negative regulation of transport	GO:0051051	6	1.72085e-14	1.59997	215	627	2817	13144	Egulf20802-RA,Eaffi05403-RA,Eaffi08922-RA,Egulf16993-RA,Egulf09425-RA,Egulf21783-RA,Eaff19521-RA,Eaffi06179-RA,Egulf11560-RA,Egulf07575-RA,Eaff18894-RA,Egulf05051-RA,Egulf14898-RA,Egulf21235-RA,Eaff03916-RA,Eaff11639-RA,Egulf21938-RA,Eaff05926-RA,Eaffi10278-RA,Eaff02324-RA,Egulf19416-RA,Egulf00279-RA,Eaffi13587-RA,Egulf22044-RA,Eaffi16624-RA,Eaff05681-RA,Eaff08383-RA,Egulf18406-RA,Eaff16655-RA,Ea…
Biological process	actin filament-based movement	GO:0030048	4	1.73195e-14	2.12301	91	200	2817	13144	Eaffi21345-RA,Eaffi18953-RA,Eaff17998-RA,Eaff11676-RA,Eaff17680-RA,Eaffi23452-RA,Egulf21938-RA,Egulf05279-RA,Egulf00537-RA,Eaffi02849-RA,Eaffi08671-RA,Egulf18406-RA,Eaff20005-RA,Eaffi21837-RA,Eaff15663-RA,Eaffi05864-RA,Eaff16196-RA,Eaffi04491-RA,Eaff19987-RA,Egulf14314-RA,Egulf07745-RA,Eaff12671-RA,Eaffi07240-RA,Eaff16646-RA,Egulf13362-RA,Eaffi08670-RA,Eaffi18038-RA,Egulf18400-RA,Egulf05093-RA,Ea…
Biological process	cardiac muscle cell contraction	GO:0086003	6	1.78746e-14	2.81082	50	83	2817	13144	Eaffi21345-RA,Eaff11676-RA,Egulf21938-RA,Egulf05279-RA,Egulf00537-RA,Egulf18406-RA,Eaff20005-RA,Eaffi21837-RA,Eaffi05864-RA,Eaff16196-RA,Eaffi04491-RA,Eaff19987-RA,Egulf07745-RA,Eaff12671-RA,Eaffi07240-RA,Eaffi18038-RA,Egulf18400-RA,Egulf05093-RA,Eaff09762-RA,Egulf13893-RA,Egulf17769-RA,Egulf04479-RA,Eaff12348-RA,Egulf04910-RA,Eaff05782-RA,Eaff08233-RA,Eaffi03176-RA,Eaff15736-RA,Eaffi04490-RA,Eaf…
Biological process	nervous system development	GO:0007399	5	1.80966e-14	1.20312	969	3758	2817	13144	Egulf04437-RA,Eaffi21345-RA,Eaff06489-RA,Egulf20802-RA,Egulf01045-RA,Eaff09079-RA,Eaff09080-RA,Egulf21337-RA,Eaff18587-RA,Eaff01580-RA,Eaff07460-RA,Eaff01338-RA,Egulf01708-RA,Eaffi07939-RA,Eaffi16694-RA,Eaff04731-RA,Eaffi08922-RA,Egulf16993-RA,Egulf13360-RA,Egulf15541-RA,Eaff00291-RA,Eaffi06167-RA,Eaff10158-RA,Eaffi18953-RA,Eaff08581-RA,Egulf02293-RA,Eaff19521-RA,Egulf18704-RA,Egulf01364-RA,Eaff1…
Biological process	regulation of synaptic plasticity	GO:0048167	8	1.85407e-14	1.8941	123	303	2817	13144	Eaffi09126-RA,Egulf13360-RA,Egulf09425-RA,Eaffi18953-RA,Egulf03251-RA,Egulf18372-RA,Egulf22131-RA,Eaff02589-RA,Eaff16598-RA,Eaff12568-RA,Eaff02324-RA,Egulf19416-RA,Egulf18134-RA,Eaffi08671-RA,Eaff10561-RA,Eaff16589-RA,Eaff17411-RA,Eaff03120-RA,Egulf05924-RA,Eaffi23010-RA,Eaffi05740-RA,Eaff13349-RA,Eaff15663-RA,Eaff09736-RA,Eaffi05715-RA,Egulf05895-RA,Egulf16403-RA,Eaff01401-RA,Eaff09485-RA,Egulf1…
Biological process	homeostatic process	GO:0042592	2	2.06501e-14	1.29429	595	2145	2817	13144	Egulf20802-RA,Egulf01045-RA,Eaffi04572-RA,Eaff01580-RA,Eaff07460-RA,Egulf01708-RA,Eaff11931-RA,Eaffi09126-RA,Eaff01936-RA,Egulf13360-RA,Eaffi23551-RA,Egulf09425-RA,Egulf21783-RA,Eaff09398-RA,Eaff14062-RA,Egulf04654-RA,Egulf21133-RA,Eaff00635-RA,Eaff17998-RA,Egulf14305-RA,Eaff18894-RA,Eaffi16723-RA,Eaff16419-RA,Egulf18372-RA,Egulf09781-RA,Eaff18129-RA,Eaffi12423-RA,Eaff10384-RA,Eaff17680-RA,Eaffi2…
Biological process	regulation of cellular component organization	GO:0051128	5	2.24265e-14	1.21428	902	3466	2817	13144	Eaffi21345-RA,Egulf20802-RA,Eaff01580-RA,Eaff01338-RA,Egulf01708-RA,Eaffi08361-RA,Eaff04731-RA,Eaffi08922-RA,Egulf16993-RA,Egulf13360-RA,Egulf15541-RA,Egulf18131-RA,Eaff00291-RA,Eaff04284-RA,Eaffi18953-RA,Eaff08581-RA,Egulf02293-RA,Eaff19521-RA,Eaffi06179-RA,Egulf18704-RA,Egulf01364-RA,Eaffi09470-RA,Eaff10707-RA,Eaff18703-RA,Egulf11560-RA,Eaff14062-RA,Eaff16534-RA,Eaffi06041-RA,Egulf13179-RA,Eaff…
Biological process	cellular response to BMP stimulus	GO:0071773	6	2.60902e-14	1.92616	116	281	2817	13144	Egulf20802-RA,Egulf01045-RA,Eaff01580-RA,Eaff17998-RA,Egulf16154-RA,Eaff12209-RA,Egulf04503-RA,Eaffi17950-RA,Eaffi21782-RA,Eaff03120-RA,Egulf05615-RA,Eaff08717-RA,Eaff20005-RA,Egulf17127-RA,Eaff02518-RA,Eaff10037-RA,Eaffi09259-RA,Eaff16196-RA,Eaff05947-RA,Egulf01052-RA,Eaff18857-RA,Egulf22016-RA,Egulf03323-RA,Eaff18521-RA,Egulf18719-RA,Egulf09416-RA,Eaffi23554-RA,Eaff13951-RA,Eaffi20926-RA,Egulf0…
Biological process	sensory system development	GO:0048880	5	2.77556e-14	1.40428	375	1246	2817	13144	Egulf04437-RA,Egulf20802-RA,Egulf01045-RA,Eaff09079-RA,Eaff09080-RA,Eaffi04572-RA,Eaff18587-RA,Eaff01338-RA,Egulf01708-RA,Eaffi07939-RA,Eaffi09126-RA,Egulf16993-RA,Eaff00291-RA,Eaff19521-RA,Eaff16534-RA,Egulf13179-RA,Egulf11154-RA,Eaff17998-RA,Egulf14305-RA,Egulf16154-RA,Eaff01084-RA,Eaff06515-RA,Egulf09781-RA,Eaffi03550-RA,Eaff02589-RA,Eaff12097-RA,Egulf02306-RA,Eaffi16011-RA,Egulf07916-RA,Eaffi…
Biological process	sensory perception of mechanical stimulus	GO:0050954	6	3.0087e-14	1.82581	135	345	2817	13144	Egulf01045-RA,Egulf13360-RA,Eaffi18953-RA,Eaff09690-RA,Egulf02334-RA,Eaff18129-RA,Egulf21938-RA,Egulf07470-RA,Eaff16598-RA,Egulf19416-RA,Eaffi08671-RA,Eaff01648-RA,Eaffi01328-RA,Eaff19053-RA,Eaff08717-RA,Egulf18406-RA,Egulf16606-RA,Eaffi21837-RA,Eaff15663-RA,Eaffi05864-RA,Egulf01052-RA,Eaff19987-RA,Egulf14314-RA,Egulf07745-RA,Eaff12371-RA,Eaff12943-RA,Egulf06473-RA,Eaffi07240-RA,Eaff03814-RA,Eaff…
Biological process	regulation of sodium ion transport	GO:0002028	8	3.18634e-14	2.57739	58	105	2817	13144	Eaff09398-RA,Egulf21938-RA,Eaff03683-RA,Egulf18406-RA,Eaffi21837-RA,Eaffi05864-RA,Eaff19987-RA,Egulf10123-RA,Egulf07745-RA,Egulf02286-RA,Eaffi07240-RA,Eaff03814-RA,Eaffi18038-RA,Egulf18400-RA,Eaff09762-RA,Egulf17769-RA,Eaff19401-RA,Egulf04479-RA,Eaff09487-RA,Eaff12348-RA,Eaff05782-RA,Eaff18149-RA,Egulf09610-RA,Eaff16080-RA,Egulf04135-RA,Egulf17820-RA,Egulf17227-RA,Eaff01559-RA,Egulf18367-RA,Eaff0…
Biological process	regulation of striated muscle contraction	GO:0006942	8	3.45279e-14	2.3856	68	133	2817	13144	Eaffi21345-RA,Eaffi06167-RA,Eaff17680-RA,Egulf21938-RA,Eaffi05569-RA,Eaffi20233-RA,Eaff09656-RA,Egulf18406-RA,Eaff20005-RA,Eaffi21837-RA,Eaff11504-RA,Eaffi05864-RA,Eaff16196-RA,Eaff19987-RA,Egulf07745-RA,Eaffi07240-RA,Eaff03814-RA,Eaff16646-RA,Egulf13362-RA,Eaffi18038-RA,Egulf18400-RA,Egulf05093-RA,Egulf18288-RA,Eaff09762-RA,Egulf13893-RA,Eaff07985-RA,Eaffi00404-RA,Eaffi09979-RA,Egulf14908-RA,Egu…
Biological process	eye development	GO:0001654	6	3.53051e-14	1.40587	370	1228	2817	13144	Egulf04437-RA,Egulf20802-RA,Egulf01045-RA,Eaff09079-RA,Eaff09080-RA,Eaffi04572-RA,Eaff18587-RA,Eaff01338-RA,Egulf01708-RA,Eaffi07939-RA,Eaffi09126-RA,Eaff00291-RA,Eaff16534-RA,Egulf13179-RA,Egulf11154-RA,Eaff17998-RA,Egulf14305-RA,Egulf16154-RA,Eaff01084-RA,Eaff06515-RA,Egulf09781-RA,Eaffi03550-RA,Eaff02589-RA,Eaff12097-RA,Egulf02306-RA,Eaffi16011-RA,Egulf07916-RA,Eaffi16810-RA,Egulf19357-RA,Eaff…
Biological process	visual system development	GO:0150063	6	3.53051e-14	1.40587	370	1228	2817	13144	Egulf04437-RA,Egulf20802-RA,Egulf01045-RA,Eaff09079-RA,Eaff09080-RA,Eaffi04572-RA,Eaff18587-RA,Eaff01338-RA,Egulf01708-RA,Eaffi07939-RA,Eaffi09126-RA,Eaff00291-RA,Eaff16534-RA,Egulf13179-RA,Egulf11154-RA,Eaff17998-RA,Egulf14305-RA,Egulf16154-RA,Eaff01084-RA,Eaff06515-RA,Egulf09781-RA,Eaffi03550-RA,Eaff02589-RA,Eaff12097-RA,Egulf02306-RA,Eaffi16011-RA,Egulf07916-RA,Eaffi16810-RA,Egulf19357-RA,Eaff…
Biological process	positive regulation of blood circulation	GO:1903524	7	3.81917e-14	2.54899	59	108	2817	13144	Eaff18894-RA,Egulf21938-RA,Egulf18406-RA,Eaff20005-RA,Eaffi21837-RA,Eaff11504-RA,Eaffi05864-RA,Eaff07643-RA,Eaff19987-RA,Egulf07745-RA,Eaffi07240-RA,Egulf18192-RA,Eaff16995-RA,Eaffi18038-RA,Egulf19242-RA,Egulf18400-RA,Egulf01239-RA,Egulf05093-RA,Eaff10566-RA,Eaff09762-RA,Eaff07985-RA,Egulf18239-RA,Eaff06642-RA,Egulf04479-RA,Eaff11503-RA,Eaff12348-RA,Eaff09795-RA,Eaffi04814-RA,Eaff09544-RA,Eaff057…
Biological process	response to external stimulus	GO:0009605	3	4.32987e-14	1.2219	849	3242	2817	13144	Egulf04437-RA,Eaffi21345-RA,Eaff06489-RA,Egulf20802-RA,Egulf01045-RA,Eaff15515-RA,Eaff09079-RA,Eaff09080-RA,Eaffi04572-RA,Eaff01580-RA,Eaff07460-RA,Eaff01338-RA,Eaffi07939-RA,Eaffi16694-RA,Eaff11931-RA,Eaff04731-RA,Egulf16993-RA,Egulf13360-RA,Eaffi23551-RA,Eaff10158-RA,Egulf09425-RA,Eaffi15139-RA,Egulf07740-RA,Eaff19521-RA,Eaff10707-RA,Egulf14723-RA,Eaff18703-RA,Eaff09398-RA,Eaff14226-RA,Egulf046…
Biological process	eating behavior	GO:0042755	5	4.42979e-14	2.01394	101	234	2817	13144	Egulf20802-RA,Eaff07460-RA,Egulf18131-RA,Eaffi06167-RA,Eaff10158-RA,Eaffi19653-RA,Eaffi12832-RA,Eaff13293-RA,Egulf18372-RA,Egulf07727-RA,Eaffi12946-RA,Eaff02890-RA,Eaffi20233-RA,Eaffi23121-RA,Egulf10934-RA,Egulf00432-RA,Eaffi21583-RA,Eaff09214-RA,Eaffi15214-RA,Eaff04968-RA,Eaff09736-RA,Eaffi02248-RA,Egulf02145-RA,Eaff07643-RA,Egulf01899-RA,Eaff01401-RA,Eaffi13417-RA,Eaffi24006-RA,Eaffi12661-RA,Ea…
Biological process	regulation of calcium:sodium antiporter activity	GO:1903279	11	5.02931e-14	3.9369	27	32	2817	13144	Egulf21938-RA,Egulf18406-RA,Eaffi05864-RA,Eaff19987-RA,Egulf07745-RA,Eaffi07240-RA,Eaffi18038-RA,Egulf18400-RA,Eaff09762-RA,Egulf04479-RA,Eaff09487-RA,Eaff12348-RA,Eaff05782-RA,Eaff18149-RA,Eaff16080-RA,Eaff01559-RA,Egulf18367-RA,Eaff09732-RA,Egulf15768-RA,Egulf01323-RA,Egulf09502-RA,Eaff09765-RA,Egulf18404-RA,Egulf19507-RA,Eaff08954-RA,Eaffi23876-RA,Eaffi01721-RA,
Biological process	regulation of biological process	GO:0050789	3	6.19504e-14	1.08347	2085	8979	2817	13144	Egulf04437-RA,Eaffi21345-RA,Eaff12249-RA,Eaffi21906-RA,Eaff06489-RA,Egulf20802-RA,Egulf01045-RA,Eaff15515-RA,Eaff09079-RA,Eaff09080-RA,Egulf21337-RA,Eaff05827-RA,Eaffi04572-RA,Egulf12619-RA,Eaff18587-RA,Eaff01580-RA,Eaff07460-RA,Eaff01338-RA,Eaff11702-RA,Eaffi05403-RA,Egulf01708-RA,Eaffi07939-RA,Egulf06159-RA,Eaffi16694-RA,Eaffi08361-RA,Eaff11931-RA,Eaff04731-RA,Eaffi09126-RA,Eaff01936-RA,Eaffi08…
Biological process	adult behavior	GO:0030534	4	6.20615e-14	1.61797	198	571	2817	13144	Eaff06489-RA,Egulf01045-RA,Egulf13360-RA,Eaff00291-RA,Eaff10158-RA,Egulf04654-RA,Egulf02334-RA,Egulf21938-RA,Eaffi05569-RA,Eaff16264-RA,Eaff09656-RA,Egulf18552-RA,Egulf10934-RA,Eaff16598-RA,Egulf22344-RA,Eaff11087-RA,Egulf00537-RA,Eaffi03766-RA,Eaff19614-RA,Eaff03120-RA,Egulf13623-RA,Eaff08717-RA,Eaff12204-RA,Egulf18406-RA,Egulf16606-RA,Eaffi21837-RA,Eaff14233-RA,Eaff10037-RA,Egulf17966-RA,Eaff04…
Biological process	regulation of actin filament-based movement	GO:1903115	6	6.92779e-14	3.29362	36	51	2817	13144	Eaffi21345-RA,Eaff17680-RA,Egulf21938-RA,Egulf18406-RA,Eaff20005-RA,Eaffi21837-RA,Eaffi05864-RA,Eaff16196-RA,Eaff19987-RA,Egulf07745-RA,Eaffi07240-RA,Eaff16646-RA,Egulf13362-RA,Eaffi18038-RA,Egulf18400-RA,Egulf05093-RA,Eaff09762-RA,Egulf13893-RA,Eaffi09979-RA,Egulf04479-RA,Eaff12348-RA,Eaff05782-RA,Eaffi15872-RA,Eaff01559-RA,Eaff05712-RA,Egulf09502-RA,Eaff11833-RA,Eaffi04288-RA,Eaff09765-RA,Egulf…
Biological process	inositol lipid-mediated signaling	GO:0048017	7	6.95e-14	2.06635	93	210	2817	13144	Eaff06489-RA,Egulf18131-RA,Eaffi19653-RA,Eaffi12832-RA,Eaff13293-RA,Egulf07727-RA,Eaffi12946-RA,Eaffi13736-RA,Eaff02890-RA,Eaffi23121-RA,Egulf00432-RA,Eaffi21782-RA,Egulf13623-RA,Eaff02518-RA,Eaffi21583-RA,Eaffi15214-RA,Egulf19943-RA,Eaffi02248-RA,Egulf05895-RA,Egulf22016-RA,Egulf08360-RA,Eaffi24006-RA,Eaffi12661-RA,Eaff04392-RA,Egulf20022-RA,Eaffi04589-RA,Eaffi13100-RA,Eaffi21784-RA,Eaffi13522-R…
Biological process	cell communication involved in cardiac conduction	GO:0086065	4	1.07581e-13	2.95053	43	68	2817	13144	Eaffi21345-RA,Egulf21938-RA,Egulf00537-RA,Egulf18406-RA,Eaff20005-RA,Eaffi21837-RA,Eaffi05864-RA,Eaff19987-RA,Egulf07745-RA,Eaff12671-RA,Eaffi07240-RA,Eaffi18038-RA,Egulf18400-RA,Egulf05093-RA,Eaff09762-RA,Egulf04479-RA,Eaff09487-RA,Eaff12348-RA,Eaff05782-RA,Eaff08233-RA,Eaffi03176-RA,Eaff15736-RA,Eaff18149-RA,Eaff16080-RA,Eaffi08938-RA,Eaff01559-RA,Egulf18367-RA,Eaff09732-RA,Egulf15768-RA,Egulf0…
Biological process	calcium-mediated signaling	GO:0019722	8	1.12355e-13	1.91034	113	276	2817	13144	Eaff07460-RA,Eaff01338-RA,Egulf13360-RA,Eaffi06167-RA,Egulf18921-RA,Egulf21938-RA,Eaffi20233-RA,Eaff16598-RA,Egulf05955-RA,Eaffi01840-RA,Eaff11087-RA,Egulf00537-RA,Eaff03120-RA,Egulf18406-RA,Eaff20005-RA,Egulf01295-RA,Egulf06586-RA,Eaffi05864-RA,Eaff19987-RA,Egulf07745-RA,Eaff12671-RA,Eaffi07240-RA,Egulf09416-RA,Eaff03814-RA,Eaff15766-RA,Eaffi18038-RA,Eaff00543-RA,Egulf18400-RA,Eaff08702-RA,Egulf…
[truncated: 8,035 more rows]

## Sheet: Table S7
Table S7. GO enrichment of contracted genes in the Eurytemora affinis complex.
Class	GO name	GO ID	GO level	P-value	Enrichment score	Hits genes counts in selected set	Hits genes counts in background	All genes counts in selected set	All genes counts in background	Genes of selected set in GO term
[truncated: 1,370 more rows]

## Sheet: Table S8
Table S8. GO enrichment of unique genes in the Eurytemora affinis complex.
[truncated: 21,594 more rows]

## Sheet: Table S9
Table S9. GO enrichment of lost genes in the Eurytemora affinis complex.
[truncated: 2,790 more rows]

[truncated: 9 more sheets: Table S10, Table S11, Table S12, Table S13, Table S14, Table S15, Table S16, Table S17, Table S18]
